# Supplementary material
Source: publisher figshare collection journal article supplement (https://diabetesjournals.figshare.com/ndownloader/files/35209738)
Supplement: Supplementary file 1 [file 35209738]

## Sheet: Legends
Legends for all tables in this supplementary file
Supplemental Table 1. Data description of contributing GWAS summary-level data.
Supplemental Table 2. Applied datasets in the MR analyses of different exposure(s)-outcome pairs.
Supplemental Table 3. Estimated Mean and SD for FI and log-FI in contributing cohort of MAGIC study.
Supplemental Table 4. The pleiotropic SNPs by searching PhenoScanner.
Supplement Table 5-7. Final IV set used in the multivariable MR analysis between lipids.
Supplement Table 8. Final IV set used in the multivariable MR analysis for lipids on FI.
Supplement Table 9. Final IV set used in the multivariable MR analysis for lipids on HbA1c.
Supplemental Table 10. Final IV set used in the multivariable MR analysis for FI on HbA1c adjusting lipids.
Supplemental Table 11. Final IV set used in the multivariable MR analysis for HbA1c on FI adjusting lipids.
Supplemental Table 12. Final IV set used in the multivariable MR analysis for FI on HDL-C adjusting TG.
Supplemental Table 13. Final IV set used in the multivariable MR analysis for FI on TG adjusting HDL-C.
Supplemental Table 14. Final IV set used in the multivariable MR analysis for HbA1c on LDL-C adjusting TG.
Supplemental Table 15. Final IV set used in the multivariable MR analysis for HbA1c on TG adjusting LDL-C.
Supplemental Table 16-18. Final IV set used in the univariable MR analysis for FI on lipid.
Supplemental Table 19-21. Final IV set used in the univariable MR analysis for HbA1c on lipid.
Supplemental Table 22. Phenotypic correlations between lipid traits and glycemic traits.
Supplemental Table 23. Genetic correlations between lipid traits and glycemic traits.
Supplemental Table 24. MVMR analyses between lipids.
Supplemental Table 25. Bidirectional MR analyses between lipids on FI.
Supplemental Table 26. Bidirectional MR analyses between lipids on HbA1c
Supplemental Table 27. Bidirectional MVMR analyses between HbA1c and FI adjusting lipids

## Sheet: S1
Supplemental Table 1. Data description of contributing GWAS summary-level data.
Trait	Consortia	Description	Sample size	Unit	Mean (SD)	Transformation	Normalization	No.variants	PMID
HDL-C	GLGC	A multi-ancestry genome-wide genetic discovery meta-analysis of lipid levels in ~1.65 million individuals, including 1.3million European ancestries	1320016	mg/dl		-	Inverse normalization	47M	34887591
	GLGC (excluding UKB participants)	A study from GLGC without participants from UK Biobank (n = 389,344)	930672	mg/dl		-	Inverse normalization	47M	34887591
	UKB	A large population-based prospective study, recruiting ~500,000 participants of middle and old age	315133	mmol/L	1.45 (0.38)	-	Inverse normalization	13M	Neale Lab
LDL-C	GLGC	-	1320016	mg/dl		-	Inverse normalization	47M	34887591
	GLGC (excluding UKB participants)	-	930672	mg/dl		-	Inverse normalization	47M	34887591
	UKB	-	343621	mmol/L	3.57 (0.87)	-	Inverse normalization	13M	Neale Lab
TG	GLGC	-	1320016	mg/dl		Natural log-transformation	Inverse normalization	47M	34887591
	GLGC (excluding UKB participants)	-	930672	mg/dl		Natural log-transformation	Inverse normalization	47M	34887591
	UKB	-	343992	mmol/L	0.42 (0.52) for log-TG	Natural log-transformation	Inverse normalization	13M	Neale Lab
FI	MAGIC	A large study aggregated GWAS studies to include up to 281,416 individuals without diabetes	151,013	pmol/L	3.73 (0.63) for log-FI *	Adjustment of BMI; natural log-transformation †	Inverse normalization	33M	34059833
HbA1c	UKB	-	344182	mmol/mol	3.27 (0.59) % (36.0 [6.52] mmol/mol)	-	Inverse normalization	13M	Neale Lab
*: The mean and SD of log-FI for each contributing cohort were calculated by assuming a lognormal distribution of FI, and then averaged across cohorts weighted by the sample size.
†: The MAGIC study reported the SNP effect estimates based on the natural log-transformed FI, but without normalization

## Sheet: S2
Supplemental Table 2. Applied datasets in the MR analyses of different exposure(s)-outcome pairs.
Exposure	Outcome	MR method	Datasets for exposure	Datasets for outcome	Sample overlap	Result table	Reason
Between lipids
Lipids	The other lipid fraction	MVMR	GLGC without UKB participants	UKB	No	S24
Between lipids and glycemic traits
Lipids	FI	MVMR	UKB	MAGIC	No	S25	-
Lipids	HbA1c	MVMR	GLGC without UKB participants	UKB	No	S26	-
FI	Lipids	UVMR	MAGIC	UKB	No	S25	-
HbA1c	Lipids	UVMR	UKB	GLGC without UKB participants	No	S26	-
Between glycemic traits
FI and lipids	HbA1c	MVMR	MAGIC (FI) + GLGC without UKB participants (lipids)	UKB	No	S27
HbA1c and lipids	FI	MVMR	UKB (HbA1c) + UKB (lipids)	GLGC without UKB participants	No	S27
Supplementary MR analyses
FI and TG	HDL-C	MVMR	MAGIC (FI) + GLGC without UKB participants (TG)	UKB		S25	Validation of the effect of FI on HDL-C and TG, independent each other
FI and HDL-C	TG	MVMR	MAGIC (FI) + GLGC without UKB participants (HDL-C)	UKB	No	S25	Validation of the effect of FI on HDL-C and TG, independent each other
HbA1c and TG	LDL-C	MVMR	UKB (HbA1c) + UKB (TG)	GLGC without UKB participants	No	S26	Validation of the effect of HbA1c on LDL-C and TG, independent each other
HbA1c and LDL-C	TG	MVMR	UKB (HbA1c) + UKB (LDL-C)	GLGC without UKB participants	No	S26	Validation of the effect of HbA1c on LDL-C and TG, independent each other

## Sheet: S3
Supplemental Table 3. Estimated Mean and SD for FI and log-FI in contributing cohort of MAGIC study.
Cohort	N	Mean (FI)	SD (FI)	Mean (log-FI)	SD (log-FI)
AGES	2850	64.7111	43.7283	3.98187	0.613293
AMISH	1617	57.5912	29.6473	3.93583	0.484849
Athersclerosis Risk in Communities (ARIC)	7885	72.0062	52.1465	4.06593	0.649337
Avon Longitudinal Study of Parents and Children (ALSPAC) Children	1409	63.7363	40.6684	3.98398	0.584428
Avon Longitudinal Study of Parents and Children (ALSPAC) Mothers	2833	33.7	28.9	3.24187	0.742462
Birth Cohort 1936 (BC 1936)	591	42.5848	23.8	3.61559	0.521365
Cardiovascular Health Study (CHS)	2854	4.4377	0.402857	1.48603	0.0905943
Cooperative Health Research in the Augsburg Region (KORA) F4	2307	52.0021	238.978	2.40307	1.75967
CROATIA-Korcula	755	36.4957	23.8615	3.41924	0.59658
CROATIA-Vis	815	47.182	46.693	3.51262	0.826307
Diabetes Genetics (DGI)	1379	35.5116	32.6037	3.26418	0.781894
DIAGEN	950	78.3942	43.0877	4.22976	0.513782
DPS	322	84.0048	41.5269	4.32156	0.467579
DRSEXTRA	1126	42.5452	27.3672	3.57744	0.588438
Ely	1254	55.6189	34.6656	3.85442	0.572886
Erasmus Rucphen Family Study (ERF)	2022	77.9131	42.6358	4.22462	0.511804
Estonian Genome Centre, University of Tartu (EGCUT)	721	64.7445	64.8836	3.8228	0.833844
Family Heart Study (FamHS)	3380	71.042	47.4248	4.079	0.607083
Fenland	1316	45.6073	31.0805	3.62934	0.617621
Fenland-OMICS	7433	47.412	38.2017	3.60873	0.707318
FIN-D2D2007	2203	42.2051	23.5182	3.60733	0.520017
Finland-United States Investigation of NIDDM Genetics (FUSION)	1142	56.0298	34.619	3.86421	0.568646
Framingham Heart Study (FHS)	5981	29.8239	16.4993	3.2618	0.516731
French Adult Control	730	33.7273	15.1795	3.42608	0.429478
French Adult Obese	445	95.2427	67.4237	4.35331	0.637359
French Young Obese	580	91.8779	75.1024	4.2646	0.71535
Genetic Epidemiology Network of Arteriopathy (GENOA)	1150	57.184	41.1536	3.8376	0.646021
Genetic Study of Athersclerosis Risk (GeneSTAR)	650	54.06	44.468	3.73171	0.718873
Genetics of Diabetes Audit and Research in Tayside Scotland (GoDARTS)	473	51.8668	3.30444	3.94665	0.0636457
Genetics of Overweight Young Adults (GOYA) Males	258	39.05	28.7	3.4489	0.65718
Genetics of Overweight Young Adults (GOYA) Males	167	67.39	47.19	4.01099	0.631675
Health2006	2515	42.3835	31.1917	3.53035	0.657895
Hellenic Isolated Cohorts (HELIC) Manolis	556	73.5949	53.1356	4.0888	0.647731
Hellenic Isolated Cohorts (HELIC) Pomak	155	78.1812	47.2841	4.20316	0.558328
IMPROVE	2476	44.6456	61.8035	3.26359	1.03456
Inter99	5222	42.938	29.6853	3.56442	0.625034
Invecchiare in Chianti (INCHIANTI)	921	61.9762	28.8023	4.02898	0.442207
Leiden Longevity Study	228	45.6693	32.2759	3.61887	0.636483
LEIPZIG-adults	452	112.984	142.252	4.25235	0.974576
LEIPZIG-kids	833	89.6922	63.958	4.29083	0.641177
London Life Science Prospective Population Study (LOLIPO) EWP	528	72.83	82.64	3.87439	0.909657
London Life Science Prospective Population Study (LOLIPOP) EW610	841	61.9526	50.5137	3.87151	0.713941
London Life Science Prospective Population Study (LOLIPOP) EWA	492	64.176	47.8741	3.94041	0.665156
Ludwigshafen Risk and Cardiovascular Health (LURIC)	1776	62.5895	49.4588	3.89402	0.696532
Metabolic Sydrome in Met (METSIM)	8518	49.31	35.147	3.69272	0.64095
Multi-Ethnic Study of Atherosclerosis (MESA)	2456	53.0392	30.5866	3.82748	0.535817
Netherlands Epidemiology of Obesity (NEO)	5149	70.4988	45.2604	4.08303	0.587473
Netherlands Twin Register (NTR)	6368	54.1489	36.2879	3.80627	0.609051
Northern Finland Birth Cohort 1966 (NFBC1966)	5240	46.1118	15.0085	3.78072	0.317323
Northern Finland Birth Cohort 1986 (NFBC1986)	4525	57.3631	1.64816	4.04899	0.0287261
Orkey Complex Disease Study (ORCADES)	1672	42.5404	26.4304	3.58724	0.571343
Oxford Biobank	6954	83.56	45.86	4.29392	0.513123
Pharmacogenetic Study of Statins in the Eldery at Risk for Vascular Disease (PROSPER)	4490	59.2679	63.2546	3.70188	0.871989
Precocious Coronary Artery Disease Study (PROCARDIS)	3264	56.3172	48.9247	3.74985	0.749865
Prevend	3402	71.1152	57.9142	4.00993	0.713263
Prospectve Investigation of the Vasculature in Uppsala Seniors (PIVUS)	838	55.2949	42.4457	3.78105	0.680632
Relationship Between Insulin Sensitivity and Cardiovascular Disease Risk (RISC)	999	34.5778	18.8637	3.41295	0.510422
Rotterdam Study (RS) 1	2733	72.7062	41.6262	4.14467	0.53246
Rotterdam Study (RS) 2	1781	77.1469	42.0678	4.21555	0.510217
Rotterdam Study (RS) 3	2681	90.2959	56.732	4.33673	0.576814
SardiNIA	5666	55.1911	45.9816	3.74722	0.726057
SORBS	754	38.6198	23.9313	3.49128	0.570059
Stockhold Coronary Artery Risk Factor study/Stockholm Heart Epidemiology Programme (SCARFSHEEP)	2446	58.5616	45.2369	3.83611	0.684064
Tracking Adolescents' Individual Lives Survey (TRAILS)	949	77.2713	36.1004	4.24861	0.44433
TwinsUK	1650	52.3	40.1	3.7258	0.679998
Uppsala Longitudinal Study of Adult Men (ULSAM)	929	77.9	49.75	4.18439	0.584868
Viking Health Study (VIKING)	2073	49.8906	219.467	2.40327	1.73583
The Raine Study	1011	64.3484	72.5207	3.75439	0.905449
The Raine Study	567	29.7348	31.0345	3.02389	0.858396
Whitehall II	2649	37.3836	30.4487	3.3668	0.713346

## Sheet: S4
Supplemental Table 4. The pleiotropic SNPs by searching PhenoScanner
Catalog	SNP	Pos	A1	A2	Trait	PMID	Beta	P	N	Unit
Blood pressure	rs6090040	chr20:62692060	A	C	Systolic blood pressure	UKBB	0.01349	4.95e-08	317754	IVNT
	rs1799945	chr6:26091179	C	G	Diastolic blood pressure	21909115	NA	4.78e-08	69395	mmHg
	rs1799945	chr6:26091179	C	G	Diastolic blood pressure	21909115	NA	4.78e-08	69395	mmHg
	rs7451008	chr6:20673880	C	T	Vascular or heart problems diagnosed by doctor: high blood pressure	UKBB	0.006717	4.51e-08	336683	risk diff
	rs6807945	chr3:138052754	C	T	Vascular or heart problems diagnosed by doctor: high blood pressure	UKBB	0.008085	4.25e-08	336683	risk diff
	rs35895680	chr17:47060322	A	C	Vascular or heart problems diagnosed by doctor: high blood pressure	UKBB	-0.006367	4.05e-08	336683	risk diff
	rs35895680	chr17:47060322	A	C	Vascular or heart problems diagnosed by doctor: high blood pressure	UKBB	-0.006367	4.05e-08	336683	risk diff
	rs35895680	chr17:47060322	A	C	Vascular or heart problems diagnosed by doctor: high blood pressure	UKBB	-0.006367	4.05e-08	336683	risk diff
	rs72681698	chr14:51207741	C	T	Vascular or heart problems diagnosed by doctor: high blood pressure	UKBB	-0.02859	3.92e-08	336683	risk diff
	rs7692995	chr4:17936634	C	T	Vascular or heart problems diagnosed by doctor: high blood pressure	UKBB	0.008186	3.6e-08	336683	risk diff
	rs7766070	chr6:20686573	A	C	Vascular or heart problems diagnosed by doctor: high blood pressure	UKBB	0.006762	3.31e-08	336683	risk diff
	rs9273379	chr6:32626881	G	C	Diastolic blood pressure	UKBB	-0.01536	2.96e-08	317756	IVNT
	rs11079868	chr17:47357969	A	G	Vascular or heart problems diagnosed by doctor: high blood pressure	UKBB	0.006029	2.96e-08	336683	risk diff
	rs56823429	chr16:81533789	A	C	Vascular or heart problems diagnosed by doctor: high blood pressure	UKBB	-0.006562	2.95e-08	336683	risk diff
	rs9496567	chr6:100602753	A	G	Diastolic blood pressure	UKBB	-0.01595	2.9e-08	317756	IVNT
	rs940904	chr12:123491572	A	G	Diastolic blood pressure	UKBB	0.01555	2.89e-08	317756	IVNT
	rs1799945	chr6:26091179	C	G	Hypertension	22100073	NA	2.89e-08	25118	-
	rs1799945	chr6:26091179	C	G	Hypertension	22100073	NA	2.89e-08	25118	-
	rs11039154	chr11:47278502	C	T	Diastolic blood pressure	UKBB	-0.01527	2.8e-08	317756	IVNT
	rs7208918	chr17:76767803	C	T	Systolic blood pressure	UKBB	-0.01377	2.66e-08	317754	IVNT
	rs17789218	chr6:100600097	C	T	Diastolic blood pressure	UKBB	-0.01593	2.6e-08	317756	IVNT
	rs17789218	chr6:100600097	C	T	Diastolic blood pressure	UKBB	-0.01593	2.6e-08	317756	IVNT
	rs34811474	chr4:25408838	A	G	Diastolic blood pressure	UKBB	-0.01621	2.59e-08	317756	IVNT
	rs10838782	chr11:47877800	A	G	Systolic blood pressure	UKBB	-0.01375	2.56e-08	317754	IVNT
	rs651007	chr9:136153875	T	C	Vascular or heart problems diagnosed by doctor: high blood pressure	UKBB	-0.007431	2.33e-08	336683	risk diff
	rs13109272	chr4:103292422	C	T	Diastolic blood pressure	UKBB	-0.02612	2.3e-08	317756	IVNT
	rs4889603	chr16:30982225	A	G	Vascular or heart problems diagnosed by doctor: high blood pressure	UKBB	0.006184	2.21e-08	336683	risk diff
	rs6090040	chr20:62692060	A	C	Vascular or heart problems diagnosed by doctor: high blood pressure	UKBB	0.006088	2.13e-08	336683	risk diff
	rs1277763	chr10:18495885	C	T	Vascular or heart problems diagnosed by doctor: high blood pressure	UKBB	-0.007551	2.07e-08	336683	risk diff
	rs11146456	chr10:134477720	A	G	Systolic blood pressure	UKBB	-0.02176	1.89e-08	317754	IVNT
	rs4729598	chr7:100221867	C	T	Diastolic blood pressure	UKBB	-0.02078	1.88e-08	317756	IVNT
	rs2160994	chr12:50650057	C	T	Diastolic blood pressure	UKBB	-0.01451	1.76e-08	317756	IVNT
	rs3184504	chr12:111884608	C	T	Systolic blood pressure and diastolic blood pressure	19862010	NA	1.7e-08	24167	-
	rs3184504	chr12:111884608	C	T	Systolic blood pressure and diastolic blood pressure	19862010	NA	1.7e-08	24167	-
	rs3184504	chr12:111884608	C	T	Systolic blood pressure and diastolic blood pressure	19862010	NA	1.7e-08	24167	-
	rs13107325	chr4:103188709	T	C	Vascular or heart problems diagnosed by doctor: high blood pressure	UKBB	-0.0116	1.69e-08	336683	risk diff
	rs13107325	chr4:103188709	T	C	Vascular or heart problems diagnosed by doctor: high blood pressure	UKBB	-0.0116	1.69e-08	336683	risk diff
	rs13107325	chr4:103188709	T	C	Vascular or heart problems diagnosed by doctor: high blood pressure	UKBB	-0.0116	1.69e-08	336683	risk diff
	rs13107325	chr4:103188709	T	C	Vascular or heart problems diagnosed by doctor: high blood pressure	UKBB	-0.0116	1.69e-08	336683	risk diff
	rs13107325	chr4:103188709	T	C	Vascular or heart problems diagnosed by doctor: high blood pressure	UKBB	-0.0116	1.69e-08	336683	risk diff
	rs13107325	chr4:103188709	T	C	Vascular or heart problems diagnosed by doctor: high blood pressure	UKBB	-0.0116	1.69e-08	336683	risk diff
	rs10518739	chr15:68014971	C	T	Vascular or heart problems diagnosed by doctor: high blood pressure	UKBB	-0.006103	1.68e-08	336683	risk diff
	rs72971192	chr6:127088318	C	T	Systolic blood pressure	UKBB	0.01655	1.6e-08	317754	IVNT
	rs4897193	chr6:127208390	A	G	Diastolic blood pressure	27618447	NA	1.6e-08	192763	INVT
	rs2934849	chr6:166162335	T	C	Diastolic blood pressure	UKBB	0.01442	1.58e-08	317756	IVNT
	rs12946454	chr17:43208121	A	T	Systolic blood pressure	21909115	NA	1.49e-08	69395	-
	rs7196161	chr16:31110981	A	G	Vascular or heart problems diagnosed by doctor: high blood pressure	UKBB	0.006352	1.47e-08	336683	risk diff
	rs7196161	chr16:31110981	A	G	Vascular or heart problems diagnosed by doctor: high blood pressure	UKBB	0.006352	1.47e-08	336683	risk diff
	rs6062343	chr20:62695931	A	G	Vascular or heart problems diagnosed by doctor: high blood pressure	UKBB	-0.006196	1.39e-08	336683	risk diff
	rs73802707	chr4:17932319	C	T	Vascular or heart problems diagnosed by doctor: high blood pressure	UKBB	-0.008571	1.37e-08	336683	risk diff
	rs2250751	chr12:51106178	G	A	Diastolic blood pressure	UKBB	-0.0147	1.3e-08	317756	IVNT
	rs6122049	chr20:62692789	C	T	Systolic blood pressure	UKBB	-0.0167	1.24e-08	317754	IVNT
	rs17185536	chr6:100620931	C	T	Diastolic blood pressure	UKBB	0.01634	1.24e-08	317756	IVNT
	rs2251024	chr12:51103633	T	C	Diastolic blood pressure	UKBB	0.01474	1.2e-08	317756	IVNT
	rs9385404	chr6:127088591	A	G	Systolic blood pressure	UKBB	-0.01661	1.19e-08	317754	IVNT
	rs12449758	chr17:3884026	A	G	Diastolic blood pressure	UKBB	-0.01517	1.17e-08	317756	IVNT
	rs6122049	chr20:62692789	C	T	Diastolic blood pressure	UKBB	-0.01675	1.15e-08	317756	IVNT
	rs6564892	chr16:81630535	C	T	Vascular or heart problems diagnosed by doctor: high blood pressure	UKBB	0.006574	1.13e-08	336683	risk diff
	rs1799945	chr6:26091179	C	G	Mean arterial pressure	22100073	NA	1.1e-08	25118	-
	rs1799945	chr6:26091179	C	G	Mean arterial pressure	22100073	NA	1.1e-08	25118	-
	rs1799945	chr6:26091179	C	G	Systolic blood pressure	UKBB	-0.01967	1.02e-08	317754	IVNT
	rs1799945	chr6:26091179	C	G	Systolic blood pressure	UKBB	-0.01967	1.02e-08	317754	IVNT
	rs12946454	chr17:43208121	A	T	Systolic blood pressure	19430483	-0.57	1e-08	-	mmHg increase
	rs12946454	chr17:43208121	A	T	Hypertension	21347282	NA	1e-08	8090	-
	rs12946454	chr17:43208121	A	T	Systolic blood pressure	19430483	NA	1e-08	34433	-
	rs12946454	chr17:43208121	A	T	Systolic blood pressure	21378095	NA	1e-08	7473	-
	rs12946454	chr17:43208121	A	T	Blood pressure	19430483	NA	1e-08	-	-
	rs7167078	chr15:41972392	C	G	Diastolic blood pressure	UKBB	0.01523	9.76e-09	317756	IVNT
	rs198851	chr6:26104632	G	T	Systolic blood pressure	UKBB	-0.01971	9.64e-09	317754	IVNT
	rs6953344	chr7:69789374	A	G	Diastolic blood pressure	UKBB	-0.01642	9.63e-09	317756	IVNT
	rs160838	chr19:11526759	G	A	Systolic blood pressure	UKBB	-0.01481	9.26e-09	317754	IVNT
	rs8126001	chr20:62711459	C	T	Vascular or heart problems diagnosed by doctor: high blood pressure	UKBB	0.006234	8.86e-09	336683	risk diff
	rs8126001	chr20:62711459	C	T	Vascular or heart problems diagnosed by doctor: high blood pressure	UKBB	0.006234	8.86e-09	336683	risk diff
	rs8126001	chr20:62711459	C	T	Vascular or heart problems diagnosed by doctor: high blood pressure	UKBB	0.006234	8.86e-09	336683	risk diff
	rs8126001	chr20:62711459	C	T	Vascular or heart problems diagnosed by doctor: high blood pressure	UKBB	0.006234	8.86e-09	336683	risk diff
	rs8126001	chr20:62711459	C	T	Vascular or heart problems diagnosed by doctor: high blood pressure	UKBB	0.006234	8.86e-09	336683	risk diff
	rs8126001	chr20:62711459	C	T	Vascular or heart problems diagnosed by doctor: high blood pressure	UKBB	0.006234	8.86e-09	336683	risk diff
	rs10995554	chr10:65295110	A	G	Diastolic blood pressure	UKBB	-0.01488	8.45e-09	317756	IVNT
	rs4639796	chr1:197126649	A	G	Systolic blood pressure	UKBB	0.01933	8.44e-09	317754	IVNT
	rs1549293	chr16:31141993	T	C	Vascular or heart problems diagnosed by doctor: high blood pressure	UKBB	-0.00652	7.63e-09	336683	risk diff
	rs550057	chr9:136146597	C	T	Diastolic blood pressure	UKBB	0.01628	7.47e-09	317756	IVNT
	rs550057	chr9:136146597	C	T	Diastolic blood pressure	UKBB	0.01628	7.47e-09	317756	IVNT
	rs1800562	chr6:26093141	A	G	Diastolic blood pressure	27618447	NA	6.66e-09	192763	INVT
	rs1800562	chr6:26093141	A	G	Diastolic blood pressure	27618447	NA	6.66e-09	192763	INVT
	rs1800562	chr6:26093141	A	G	Diastolic blood pressure	27618447	NA	6.66e-09	192763	INVT
	rs1800562	chr6:26093141	A	G	Diastolic blood pressure	27618447	NA	6.66e-09	192763	INVT
	rs80215559	chr6:25918225	C	T	Vascular or heart problems diagnosed by doctor: high blood pressure	UKBB	0.01178	6.52e-09	336683	risk diff
	rs2306363	chr11:65405600	G	T	Systolic blood pressure	UKBB	0.01765	6.48e-09	317754	IVNT
	rs6062343	chr20:62695931	A	G	Systolic blood pressure	UKBB	-0.01448	5.71e-09	317754	IVNT
	rs4766502	chr12:111769641	T	G	Vascular or heart problems diagnosed by doctor: high blood pressure	UKBB	-0.007489	5.18e-09	336683	risk diff
	rs3184504	chr12:111884608	C	T	Systolic blood pressure	19430479	-0.58	5e-09	-	mmHg increase
	rs3184504	chr12:111884608	C	T	Systolic blood pressure	19430479	-0.58	5e-09	-	mmHg increase
	rs3184504	chr12:111884608	C	T	Systolic blood pressure	19430479	-0.58	5e-09	-	mmHg increase
	rs3184504	chr12:111884608	C	T	Systolic blood pressure	19430479	NA	4.52e-09	29136	-
	rs3184504	chr12:111884608	C	T	Systolic blood pressure	21378095	NA	4.52e-09	7473	-
	rs3184504	chr12:111884608	C	T	Systolic blood pressure	19430479	NA	4.52e-09	29136	-
	rs3184504	chr12:111884608	C	T	Systolic blood pressure	21378095	NA	4.52e-09	7473	-
	rs3184504	chr12:111884608	C	T	Systolic blood pressure	19430479	NA	4.52e-09	29136	-
	rs3184504	chr12:111884608	C	T	Systolic blood pressure	21378095	NA	4.52e-09	7473	-
	rs2519093	chr9:136141870	C	T	Vascular or heart problems diagnosed by doctor: high blood pressure	UKBB	0.008158	4.43e-09	336683	risk diff
	rs2519093	chr9:136141870	C	T	Vascular or heart problems diagnosed by doctor: high blood pressure	UKBB	0.008158	4.43e-09	336683	risk diff
	rs2519093	chr9:136141870	C	T	Vascular or heart problems diagnosed by doctor: high blood pressure	UKBB	0.008158	4.43e-09	336683	risk diff
	rs2519093	chr9:136141870	C	T	Vascular or heart problems diagnosed by doctor: high blood pressure	UKBB	0.008158	4.43e-09	336683	risk diff
	rs2519093	chr9:136141870	C	T	Vascular or heart problems diagnosed by doctor: high blood pressure	UKBB	0.008158	4.43e-09	336683	risk diff
	rs2427531	chr20:62362116	C	G	Diastolic blood pressure	UKBB	-0.01679	4.28e-09	317756	IVNT
	rs10750766	chr11:65473798	A	C	Vascular or heart problems diagnosed by doctor: high blood pressure	UKBB	0.007018	4.06e-09	336683	risk diff
	rs10750766	chr11:65473798	A	C	Vascular or heart problems diagnosed by doctor: high blood pressure	UKBB	0.007018	4.06e-09	336683	risk diff
	rs10750766	chr11:65473798	A	C	Vascular or heart problems diagnosed by doctor: high blood pressure	UKBB	0.007018	4.06e-09	336683	risk diff
	rs10750766	chr11:65473798	A	C	Vascular or heart problems diagnosed by doctor: high blood pressure	UKBB	0.007018	4.06e-09	336683	risk diff
	rs10750766	chr11:65473798	A	C	Vascular or heart problems diagnosed by doctor: high blood pressure	UKBB	0.007018	4.06e-09	336683	risk diff
	rs2499787	chr6:96841762	C	G	Systolic blood pressure	UKBB	-0.01966	3.9e-09	317754	IVNT
	rs8081417	chr17:3902650	A	T	Diastolic blood pressure	UKBB	0.01561	3.83e-09	317756	IVNT
	rs8126001	chr20:62711459	C	T	Systolic blood pressure	UKBB	0.01455	3.7e-09	317754	IVNT
	rs8126001	chr20:62711459	C	T	Systolic blood pressure	UKBB	0.01455	3.7e-09	317754	IVNT
	rs8126001	chr20:62711459	C	T	Systolic blood pressure	UKBB	0.01455	3.7e-09	317754	IVNT
	rs8126001	chr20:62711459	C	T	Systolic blood pressure	UKBB	0.01455	3.7e-09	317754	IVNT
	rs8126001	chr20:62711459	C	T	Systolic blood pressure	UKBB	0.01455	3.7e-09	317754	IVNT
	rs8126001	chr20:62711459	C	T	Systolic blood pressure	UKBB	0.01455	3.7e-09	317754	IVNT
	rs1151624	chr20:62369895	A	G	Diastolic blood pressure	UKBB	-0.01686	3.61e-09	317756	IVNT
	rs1151624	chr20:62369895	A	G	Diastolic blood pressure	UKBB	-0.01686	3.61e-09	317756	IVNT
	rs17698176	chr17:44819595	G	T	Systolic blood pressure	UKBB	0.01745	3.48e-09	317754	IVNT
	rs72971192	chr6:127088318	C	T	Diastolic blood pressure	UKBB	0.01733	3.35e-09	317756	IVNT
	rs9385404	chr6:127088591	A	G	Diastolic blood pressure	UKBB	-0.01727	3.15e-09	317756	IVNT
	rs532436	chr9:136149830	A	G	Vascular or heart problems diagnosed by doctor: high blood pressure	UKBB	-0.008254	2.8e-09	336683	risk diff
	rs13039439	chr20:62703490	C	T	Systolic blood pressure	UKBB	-0.01695	2.49e-09	317754	IVNT
	rs1458038	chr4:81164723	T	C	Systolic blood pressure	21909115	NA	2.12e-09	69395	mmHg
	rs1799945	chr6:26091179	C	G	Systolic blood pressure	21909110	NA	2.04e-09	74064	-
	rs1799945	chr6:26091179	C	G	Systolic blood pressure	21909110	NA	2.04e-09	74064	-
	rs1799945	chr6:26091179	C	G	Diastolic blood pressure	22100073	NA	1.97e-09	25118	-
	rs1799945	chr6:26091179	C	G	Diastolic blood pressure	22100073	NA	1.97e-09	25118	-
	rs194505	chr7:89841307	A	G	Diastolic blood pressure	UKBB	-0.01487	1.81e-09	317756	IVNT
	rs12421055	chr11:122528352	A	C	Diastolic blood pressure	UKBB	-0.01716	1.8e-09	317756	IVNT
	rs72681698	chr14:51207741	C	T	Diastolic blood pressure	UKBB	-0.07171	1.76e-09	317756	IVNT
	rs12319419	chr12:54420776	C	G	Vascular or heart problems diagnosed by doctor: high blood pressure	UKBB	-0.006774	1.76e-09	336683	risk diff
	rs3184504	chr12:111884608	C	T	Systolic blood pressure	23202125	NA	1.69e-09	194427	-
	rs3184504	chr12:111884608	C	T	Systolic blood pressure	21909115	NA	1.69e-09	69395	mmHg
	rs3184504	chr12:111884608	C	T	Systolic blood pressure	23202125	NA	1.69e-09	194427	-
	rs3184504	chr12:111884608	C	T	Systolic blood pressure	21909115	NA	1.69e-09	69395	mmHg
	rs3184504	chr12:111884608	C	T	Systolic blood pressure	23202125	NA	1.69e-09	194427	-
	rs3184504	chr12:111884608	C	T	Systolic blood pressure	21909115	NA	1.69e-09	69395	mmHg
	rs10409243	chr19:10332988	C	T	Systolic blood pressure	UKBB	0.01536	1.58e-09	317754	IVNT
	rs8057044	chr16:53812614	A	G	Vascular or heart problems diagnosed by doctor: high blood pressure	UKBB	0.00655	1.44e-09	336683	risk diff
	rs12442901	chr15:75083912	A	G	Systolic blood pressure	21909115	NA	1.41e-09	69395	-
	rs12442901	chr15:75083912	A	G	Systolic blood pressure	21909115	NA	1.41e-09	69395	mmHg
	rs1799945	chr6:26091179	C	G	Diastolic blood pressure	27618447	NA	1.26e-09	192763	INVT
	rs1799945	chr6:26091179	C	G	Diastolic blood pressure	27618447	NA	1.26e-09	192763	INVT
	rs2925979	chr16:81534790	T	C	Vascular or heart problems diagnosed by doctor: high blood pressure	UKBB	0.007161	1.18e-09	336683	risk diff
	rs2925979	chr16:81534790	T	C	Vascular or heart problems diagnosed by doctor: high blood pressure	UKBB	0.007161	1.18e-09	336683	risk diff
	rs2925979	chr16:81534790	T	C	Vascular or heart problems diagnosed by doctor: high blood pressure	UKBB	0.007161	1.18e-09	336683	risk diff
	rs2925979	chr16:81534790	T	C	Vascular or heart problems diagnosed by doctor: high blood pressure	UKBB	0.007161	1.18e-09	336683	risk diff
	rs2925979	chr16:81534790	T	C	Vascular or heart problems diagnosed by doctor: high blood pressure	UKBB	0.007161	1.18e-09	336683	risk diff
	rs2925979	chr16:81534790	T	C	Vascular or heart problems diagnosed by doctor: high blood pressure	UKBB	0.007161	1.18e-09	336683	risk diff
	rs9943712	chr12:51160715	C	T	Diastolic blood pressure	UKBB	0.01524	1.11e-09	317756	IVNT
	rs9943712	chr12:51160715	C	T	Diastolic blood pressure	UKBB	0.01524	1.11e-09	317756	IVNT
	rs1047891	chr2:211540507	A	C	Systolic blood pressure	UKBB	-0.01612	1.1e-09	317754	IVNT
	rs1047891	chr2:211540507	A	C	Systolic blood pressure	UKBB	-0.01612	1.1e-09	317754	IVNT
	rs1047891	chr2:211540507	A	C	Systolic blood pressure	UKBB	-0.01612	1.1e-09	317754	IVNT
	rs10017313	chr4:103861380	G	A	Vascular or heart problems diagnosed by doctor: high blood pressure	UKBB	-0.006609	9.49e-10	336683	risk diff
	rs10017313	chr4:103861380	G	A	Vascular or heart problems diagnosed by doctor: high blood pressure	UKBB	-0.006609	9.49e-10	336683	risk diff
	rs12962548	chr18:42599167	A	G	Systolic blood pressure	UKBB	0.01644	9.16e-10	317754	IVNT
	rs9844972	chr3:150097635	C	G	Vascular or heart problems diagnosed by doctor: high blood pressure	UKBB	0.01312	8.49e-10	336683	risk diff
	rs1799945	chr6:26091179	C	G	Systolic blood pressure	28739976	-0.627	8e-10	-	unit increase
	rs1799945	chr6:26091179	C	G	Systolic blood pressure	28739976	-0.627	8e-10	-	unit increase
	rs35675346	chr16:30936081	G	A	Diastolic blood pressure	UKBB	-0.01774	7.92e-10	317756	IVNT
	rs72683923	chr14:50735947	C	T	Diastolic blood pressure	UKBB	-0.05446	7.91e-10	317756	IVNT
	rs1800562	chr6:26093141	A	G	Vascular or heart problems diagnosed by doctor: high blood pressure	UKBB	0.01241	7.58e-10	336683	risk diff
	rs1800562	chr6:26093141	A	G	Vascular or heart problems diagnosed by doctor: high blood pressure	UKBB	0.01241	7.58e-10	336683	risk diff
	rs1800562	chr6:26093141	A	G	Vascular or heart problems diagnosed by doctor: high blood pressure	UKBB	0.01241	7.58e-10	336683	risk diff
	rs1800562	chr6:26093141	A	G	Vascular or heart problems diagnosed by doctor: high blood pressure	UKBB	0.01241	7.58e-10	336683	risk diff
	rs10231941	chr7:100532540	C	T	Diastolic blood pressure	UKBB	0.0198	7.37e-10	317756	IVNT
	rs13107325	chr4:103188709	T	C	Systolic blood pressure	28739976	0.933	6e-10	-	unit decrease
	rs13107325	chr4:103188709	T	C	Systolic blood pressure	28739976	0.933	6e-10	-	unit decrease
	rs13107325	chr4:103188709	T	C	Systolic blood pressure	28739976	0.933	6e-10	-	unit decrease
	rs13107325	chr4:103188709	T	C	Systolic blood pressure	28739976	0.933	6e-10	-	unit decrease
	rs13107325	chr4:103188709	T	C	Systolic blood pressure	28739976	0.933	6e-10	-	unit decrease
	rs13107325	chr4:103188709	T	C	Systolic blood pressure	28739976	0.933	6e-10	-	unit decrease
	rs72681869	chr14:50655357	C	G	Vascular or heart problems diagnosed by doctor: high blood pressure	UKBB	-0.03202	5.92e-10	336683	risk diff
	rs72681869	chr14:50655357	C	G	Vascular or heart problems diagnosed by doctor: high blood pressure	UKBB	-0.03202	5.92e-10	336683	risk diff
	rs4889603	chr16:30982225	A	G	Diastolic blood pressure	UKBB	0.01571	4.41e-10	317756	IVNT
	rs35030155	chr8:11799091	A	T	Diastolic blood pressure	UKBB	0.017	4.15e-10	317756	IVNT
	rs7896783	chr10:65162153	A	G	Diastolic blood pressure	UKBB	-0.01542	4.12e-10	317756	IVNT
	rs12925668	chr16:81577016	A	G	Vascular or heart problems diagnosed by doctor: high blood pressure	UKBB	0.006822	4.07e-10	336683	risk diff
	rs7412	chr19:45412079	C	T	Pulse pressure	28135244	-0.3826	4e-10	-	unit decrease
	rs7412	chr19:45412079	C	T	Pulse pressure	28135244	-0.3826	4e-10	-	unit decrease
	rs3184504	chr12:111884608	C	T	Hypertension	27618447	NA	3.92e-10	183273	log OR
	rs3184504	chr12:111884608	C	T	Hypertension	27618447	NA	3.92e-10	183273	log OR
	rs3184504	chr12:111884608	C	T	Hypertension	27618447	NA	3.92e-10	183273	log OR
	rs12442901	chr15:75083912	A	G	Diastolic blood pressure	21909115	NA	3.9e-10	69395	-
	rs12442901	chr15:75083912	A	G	Diastolic blood pressure	21909115	NA	3.9e-10	69395	mmHg
	rs564449	chr7:100321138	G	T	Diastolic blood pressure	UKBB	-0.024	3.61e-10	317756	IVNT
	rs564449	chr7:100321138	G	T	Diastolic blood pressure	UKBB	-0.024	3.61e-10	317756	IVNT
	rs35722851	chr7:130434500	C	T	Vascular or heart problems diagnosed by doctor: high blood pressure	UKBB	-0.006799	3.35e-10	336683	risk diff
	rs2306363	chr11:65405600	G	T	Vascular or heart problems diagnosed by doctor: high blood pressure	UKBB	0.008405	3.11e-10	336683	risk diff
	rs972283	chr7:130466854	A	G	Vascular or heart problems diagnosed by doctor: high blood pressure	UKBB	-0.006811	2.86e-10	336683	risk diff
	rs972283	chr7:130466854	A	G	Vascular or heart problems diagnosed by doctor: high blood pressure	UKBB	-0.006811	2.86e-10	336683	risk diff
	rs62052828	chr16:69624689	A	G	Systolic blood pressure	UKBB	0.03558	2.46e-10	317754	IVNT
	rs4731701	chr7:130430930	C	T	Vascular or heart problems diagnosed by doctor: high blood pressure	UKBB	0.006861	2.37e-10	336683	risk diff
	rs651007	chr9:136153875	T	C	Diastolic blood pressure	UKBB	-0.01918	2.34e-10	317756	IVNT
	rs4766502	chr12:111769641	T	G	Systolic blood pressure	UKBB	-0.0185	2.28e-10	317754	IVNT
	rs13107325	chr4:103188709	T	C	Systolic blood pressure	21909110	NA	2.16e-10	74064	-
	rs13107325	chr4:103188709	T	C	Systolic blood pressure	21909110	NA	2.16e-10	74064	-
	rs13107325	chr4:103188709	T	C	Systolic blood pressure	21909110	NA	2.16e-10	74064	-
	rs13107325	chr4:103188709	T	C	Systolic blood pressure	21909110	NA	2.16e-10	74064	-
	rs13107325	chr4:103188709	T	C	Systolic blood pressure	21909110	NA	2.16e-10	74064	-
	rs13107325	chr4:103188709	T	C	Systolic blood pressure	21909110	NA	2.16e-10	74064	-
	rs3184504	chr12:111884608	C	T	Diastolic blood pressure	26390057	-0.5387	2e-10	-	mmHg increase
	rs3184504	chr12:111884608	C	T	Diastolic blood pressure	26390057	-0.5387	2e-10	-	mmHg increase
	rs3184504	chr12:111884608	C	T	Diastolic blood pressure	26390057	-0.5387	2e-10	-	mmHg increase
	rs1799945	chr6:26091179	C	G	Hypertension	21909115	-0.095	2e-10	-	unit increase
	rs1799945	chr6:26091179	C	G	Hypertension	21909115	-0.095	2e-10	-	unit increase
	rs1799945	chr6:26091179	C	G	Hypertension	21909115	NA	2e-10	-	-
	rs1799945	chr6:26091179	C	G	Hypertension	21909115	NA	2e-10	-	-
	rs2773469	chr10:115798895	G	A	Systolic blood pressure	UKBB	0.01778	1.99e-10	317754	IVNT
	rs1799945	chr6:26091179	C	G	Hypertension	21909115	NA	1.8e-10	69395	-
	rs1799945	chr6:26091179	C	G	Hypertension	21909115	NA	1.8e-10	69395	-
	rs13039439	chr20:62703490	C	T	Diastolic blood pressure	UKBB	-0.01821	1.53e-10	317756	IVNT
	rs4897193	chr6:127208390	A	G	Diastolic blood pressure	UKBB	0.01587	1.43e-10	317756	IVNT
	rs10849943	chr12:111819589	C	T	Vascular or heart problems diagnosed by doctor: high blood pressure	UKBB	0.008531	1.34e-10	336683	risk diff
	rs10865959	chr3:49891002	C	G	Diastolic blood pressure	UKBB	0.01695	1.31e-10	317756	IVNT
	rs10865959	chr3:49891002	C	G	Diastolic blood pressure	UKBB	0.01695	1.31e-10	317756	IVNT
	rs10865959	chr3:49891002	C	G	Diastolic blood pressure	UKBB	0.01695	1.31e-10	317756	IVNT
	rs10865959	chr3:49891002	C	G	Diastolic blood pressure	UKBB	0.01695	1.31e-10	317756	IVNT
	rs13107325	chr4:103188709	T	C	Mean arterial pressure	21909110	NA	1.3e-10	74064	-
	rs13107325	chr4:103188709	T	C	Mean arterial pressure	21909110	NA	1.3e-10	74064	-
	rs13107325	chr4:103188709	T	C	Mean arterial pressure	21909110	NA	1.3e-10	74064	-
	rs13107325	chr4:103188709	T	C	Mean arterial pressure	21909110	NA	1.3e-10	74064	-
	rs13107325	chr4:103188709	T	C	Mean arterial pressure	21909110	NA	1.3e-10	74064	-
	rs13107325	chr4:103188709	T	C	Mean arterial pressure	21909110	NA	1.3e-10	74064	-
	rs7076938	chr10:115789375	C	T	Systolic blood pressure	UKBB	-0.01797	1.28e-10	317754	IVNT
	rs6974400	chr7:130424075	A	G	Vascular or heart problems diagnosed by doctor: high blood pressure	UKBB	-0.007031	1.24e-10	336683	risk diff
	rs11762784	chr7:130424646	A	G	Vascular or heart problems diagnosed by doctor: high blood pressure	UKBB	-0.007039	1.16e-10	336683	risk diff
	rs11762784	chr7:130424646	A	G	Vascular or heart problems diagnosed by doctor: high blood pressure	UKBB	-0.007039	1.16e-10	336683	risk diff
	rs8065527	chr17:45024027	A	G	Systolic blood pressure	UKBB	0.01664	1.15e-10	317754	IVNT
	rs2519093	chr9:136141870	C	T	Diastolic blood pressure	UKBB	0.02042	1.04e-10	317756	IVNT
	rs2519093	chr9:136141870	C	T	Diastolic blood pressure	UKBB	0.02042	1.04e-10	317756	IVNT
	rs2519093	chr9:136141870	C	T	Diastolic blood pressure	UKBB	0.02042	1.04e-10	317756	IVNT
	rs2519093	chr9:136141870	C	T	Diastolic blood pressure	UKBB	0.02042	1.04e-10	317756	IVNT
	rs2519093	chr9:136141870	C	T	Diastolic blood pressure	UKBB	0.02042	1.04e-10	317756	IVNT
	rs13107325	chr4:103188709	T	C	Blood pressure	21909110	0.633	1e-10	-	mmHg decrease
	rs13107325	chr4:103188709	T	C	Blood pressure	21909110	0.633	1e-10	-	mmHg decrease
	rs13107325	chr4:103188709	T	C	Blood pressure	21909110	0.633	1e-10	-	mmHg decrease
	rs13107325	chr4:103188709	T	C	Blood pressure	21909110	0.633	1e-10	-	mmHg decrease
	rs13107325	chr4:103188709	T	C	Blood pressure	21909110	0.633	1e-10	-	mmHg decrease
	rs13107325	chr4:103188709	T	C	Blood pressure	21909110	0.633	1e-10	-	mmHg decrease
	rs13107325	chr4:103188709	T	C	Blood pressure	21909110	NA	1e-10	-	-
	rs13107325	chr4:103188709	T	C	Blood pressure	21909110	NA	1e-10	-	-
	rs13107325	chr4:103188709	T	C	Blood pressure	21909110	NA	1e-10	-	-
	rs13107325	chr4:103188709	T	C	Blood pressure	21909110	NA	1e-10	-	-
	rs13107325	chr4:103188709	T	C	Blood pressure	21909110	NA	1e-10	-	-
	rs13107325	chr4:103188709	T	C	Blood pressure	21909110	NA	1e-10	-	-
	rs13107325	chr4:103188709	T	C	Diastolic blood pressure	27618447	NA	7.94e-11	192763	INVT
	rs13107325	chr4:103188709	T	C	Diastolic blood pressure	27618447	NA	7.94e-11	192763	INVT
	rs13107325	chr4:103188709	T	C	Diastolic blood pressure	27618447	NA	7.94e-11	192763	INVT
	rs13107325	chr4:103188709	T	C	Diastolic blood pressure	27618447	NA	7.94e-11	192763	INVT
	rs13107325	chr4:103188709	T	C	Diastolic blood pressure	27618447	NA	7.94e-11	192763	INVT
	rs13107325	chr4:103188709	T	C	Diastolic blood pressure	27618447	NA	7.94e-11	192763	INVT
	rs13263821	chr8:105982209	C	G	Vascular or heart problems diagnosed by doctor: high blood pressure	UKBB	-0.009227	6.45e-11	336683	risk diff
	rs532436	chr9:136149830	A	G	Diastolic blood pressure	UKBB	-0.02067	5.98e-11	317756	IVNT
	rs13263073	chr8:105982216	A	C	Vascular or heart problems diagnosed by doctor: high blood pressure	UKBB	0.009249	5.77e-11	336683	risk diff
	rs10750766	chr11:65473798	A	C	Diastolic blood pressure	UKBB	0.01782	5.55e-11	317756	IVNT
	rs10750766	chr11:65473798	A	C	Diastolic blood pressure	UKBB	0.01782	5.55e-11	317756	IVNT
	rs10750766	chr11:65473798	A	C	Diastolic blood pressure	UKBB	0.01782	5.55e-11	317756	IVNT
	rs10750766	chr11:65473798	A	C	Diastolic blood pressure	UKBB	0.01782	5.55e-11	317756	IVNT
	rs10750766	chr11:65473798	A	C	Diastolic blood pressure	UKBB	0.01782	5.55e-11	317756	IVNT
	rs2249741	chr6:31240712	A	C	Diastolic blood pressure	UKBB	-0.01614	5.07e-11	317756	IVNT
	rs2249741	chr6:31240712	A	C	Diastolic blood pressure	UKBB	-0.01614	5.07e-11	317756	IVNT
	rs72681869	chr14:50655357	C	G	Diastolic blood pressure	UKBB	-0.07789	4.98e-11	317756	IVNT
	rs72681869	chr14:50655357	C	G	Diastolic blood pressure	UKBB	-0.07789	4.98e-11	317756	IVNT
	rs28394864	chr17:47450775	A	G	Vascular or heart problems diagnosed by doctor: high blood pressure	UKBB	0.007161	4.61e-11	336683	risk diff
	rs28394864	chr17:47450775	A	G	Vascular or heart problems diagnosed by doctor: high blood pressure	UKBB	0.007161	4.61e-11	336683	risk diff
	rs80215559	chr6:25918225	C	T	Diastolic blood pressure	UKBB	0.03069	3.61e-11	317756	IVNT
	rs28383314	chr6:32587213	C	T	Diastolic blood pressure	UKBB	0.01686	3.19e-11	317756	IVNT
	rs12953014	chr17:47453444	A	G	Diastolic blood pressure	UKBB	-0.01703	2.39e-11	317756	IVNT
	rs1800562	chr6:26093141	A	G	Diastolic blood pressure	UKBB	0.03082	2.26e-11	317756	IVNT
	rs1800562	chr6:26093141	A	G	Diastolic blood pressure	UKBB	0.03082	2.26e-11	317756	IVNT
	rs1800562	chr6:26093141	A	G	Diastolic blood pressure	UKBB	0.03082	2.26e-11	317756	IVNT
	rs1800562	chr6:26093141	A	G	Diastolic blood pressure	UKBB	0.03082	2.26e-11	317756	IVNT
	rs10849943	chr12:111819589	C	T	Systolic blood pressure	UKBB	0.02021	2.23e-11	317754	IVNT
	rs13107325	chr4:103188709	T	C	Diastolic blood pressure	21909110	NA	2.11e-11	74064	-
	rs13107325	chr4:103188709	T	C	Diastolic blood pressure	21909110	NA	2.11e-11	74064	-
	rs13107325	chr4:103188709	T	C	Diastolic blood pressure	21909110	NA	2.11e-11	74064	-
	rs13107325	chr4:103188709	T	C	Diastolic blood pressure	21909110	NA	2.11e-11	74064	-
	rs13107325	chr4:103188709	T	C	Diastolic blood pressure	21909110	NA	2.11e-11	74064	-
	rs13107325	chr4:103188709	T	C	Diastolic blood pressure	21909110	NA	2.11e-11	74064	-
	rs28394864	chr17:47450775	A	G	Diastolic blood pressure	UKBB	0.0166	2.07e-11	317756	IVNT
	rs28394864	chr17:47450775	A	G	Diastolic blood pressure	UKBB	0.0166	2.07e-11	317756	IVNT
	rs1250259	chr2:216300482	A	T	Systolic blood pressure	UKBB	-0.01885	1.57e-11	317754	IVNT
	rs1250259	chr2:216300482	A	T	Systolic blood pressure	UKBB	-0.01885	1.57e-11	317754	IVNT
	rs35225200	chr4:103146888	A	C	Diastolic blood pressure	UKBB	0.03107	1.39e-11	317756	IVNT
	rs7924036	chr10:65191645	G	T	Diastolic blood pressure	UKBB	0.01668	1.28e-11	317756	IVNT
	rs7924036	chr10:65191645	G	T	Diastolic blood pressure	UKBB	0.01668	1.28e-11	317756	IVNT
	rs4897193	chr6:127208390	A	G	Systolic blood pressure	UKBB	0.01676	1.21e-11	317754	IVNT
	rs360140	chr11:9776567	A	C	Vascular or heart problems diagnosed by doctor: high blood pressure	UKBB	0.00766	1.2e-11	336683	risk diff
	rs55901622	chr6:127157438	A	G	Vascular or heart problems diagnosed by doctor: high blood pressure	UKBB	0.008264	9.94e-12	336683	risk diff
	rs7315519	chr12:113192927	A	G	Diastolic blood pressure	UKBB	0.01702	8.86e-12	317756	IVNT
	rs1799945	chr6:26091179	C	G	Diastolic blood pressure	21909110	NA	8.05e-12	74064	-
	rs1799945	chr6:26091179	C	G	Diastolic blood pressure	21909110	NA	8.05e-12	74064	-
	rs1799945	chr6:26091179	C	G	Systolic blood pressure	21909115	-0.627	8e-12	-	mmHg increase
	rs1799945	chr6:26091179	C	G	Systolic blood pressure	21909115	-0.627	8e-12	-	mmHg increase
	rs1799945	chr6:26091179	C	G	Systolic blood pressure	21909115	NA	7.7e-12	69395	-
	rs1799945	chr6:26091179	C	G	Systolic blood pressure	21909115	NA	7.7e-12	69395	-
	rs1799945	chr6:26091179	C	G	Mean arterial pressure	21909110	NA	6.55e-12	74064	-
	rs1799945	chr6:26091179	C	G	Mean arterial pressure	21909110	NA	6.55e-12	74064	-
	rs34071855	chr1:10798489	C	G	Diastolic blood pressure	UKBB	-0.01791	6.27e-12	317756	IVNT
	rs12628032	chr22:19967980	C	T	Pulse pressure	28135244	-0.24	6e-12	-	unit increase
	rs2596544	chr6:31329291	A	T	Diastolic blood pressure	UKBB	-0.02055	5.92e-12	317756	IVNT
	rs28526689	chr15:41927330	A	G	Diastolic blood pressure	UKBB	0.01794	4.77e-12	317756	IVNT
	rs2540949	chr2:65284231	T	A	Systolic blood pressure	UKBB	-0.01757	4.67e-12	317754	IVNT
	rs2540949	chr2:65284231	T	A	Systolic blood pressure	UKBB	-0.01757	4.67e-12	317754	IVNT
	rs7076938	chr10:115789375	C	T	Systolic blood pressure	27618447	NA	3.76e-12	192763	INVT
	rs11042906	chr11:10665235	C	T	Systolic blood pressure	UKBB	-0.01889	3.38e-12	317754	IVNT
	rs2306363	chr11:65405600	G	T	Diastolic blood pressure	UKBB	0.02157	1.34e-12	317756	IVNT
	rs12928974	chr16:75304957	C	T	Systolic blood pressure	UKBB	-0.01772	1.21e-12	317754	IVNT
	rs598710	chr12:111973141	C	A	Vascular or heart problems diagnosed by doctor: high blood pressure	UKBB	-0.009586	1.07e-12	336683	risk diff
	rs598711	chr12:111973140	G	A	Vascular or heart problems diagnosed by doctor: high blood pressure	UKBB	-0.009595	1.02e-12	336683	risk diff
	rs598711	chr12:111973140	G	A	Systolic blood pressure	UKBB	-0.02193	8.24e-13	317754	IVNT
	rs598710	chr12:111973141	C	A	Systolic blood pressure	UKBB	-0.02193	8.19e-13	317754	IVNT
	rs1458038	chr4:81164723	T	C	Diastolic blood pressure	21909115	NA	7.91e-13	69395	mmHg
	rs4841638	chr8:11796023	C	T	Diastolic blood pressure	UKBB	0.0178	7.23e-13	317756	IVNT
	rs9923544	chr16:53801985	C	T	Vascular or heart problems diagnosed by doctor: high blood pressure	UKBB	-0.007919	4.53e-13	336683	risk diff
	rs7196195	chr16:81609598	G	T	Vascular or heart problems diagnosed by doctor: high blood pressure	UKBB	0.007947	4.48e-13	336683	risk diff
	rs1121980	chr16:53809247	G	A	Vascular or heart problems diagnosed by doctor: high blood pressure	UKBB	-0.007942	3.83e-13	336683	risk diff
	rs11042906	chr11:10665235	C	T	Diastolic blood pressure	UKBB	-0.01986	2.56e-13	317756	IVNT
	rs72971192	chr6:127088318	C	T	Vascular or heart problems diagnosed by doctor: high blood pressure	UKBB	0.009446	2.1e-13	336683	risk diff
	rs12442901	chr15:75083912	A	G	Systolic blood pressure	UKBB	0.02069	1.38e-13	317754	IVNT
	rs901746	chr11:47260319	A	G	Vascular or heart problems diagnosed by doctor: high blood pressure	UKBB	0.008713	1.15e-13	336683	risk diff
	rs11039154	chr11:47278502	C	T	Vascular or heart problems diagnosed by doctor: high blood pressure	UKBB	-0.008975	1.04e-13	336683	risk diff
	rs3758669	chr11:47272579	A	G	Vascular or heart problems diagnosed by doctor: high blood pressure	UKBB	0.008729	1.04e-13	336683	risk diff
	rs13107325	chr4:103188709	T	C	Diastolic blood pressure	28739976	0.686	1e-13	-	unit decrease
	rs13107325	chr4:103188709	T	C	Diastolic blood pressure	28739976	0.686	1e-13	-	unit decrease
	rs13107325	chr4:103188709	T	C	Diastolic blood pressure	28739976	0.686	1e-13	-	unit decrease
	rs13107325	chr4:103188709	T	C	Diastolic blood pressure	28739976	0.686	1e-13	-	unit decrease
	rs13107325	chr4:103188709	T	C	Diastolic blood pressure	28739976	0.686	1e-13	-	unit decrease
	rs13107325	chr4:103188709	T	C	Diastolic blood pressure	28739976	0.686	1e-13	-	unit decrease
	rs1458038	chr4:81164723	T	C	Systolic blood pressure	21909110	NA	9.42e-14	74064	-
	rs1799945	chr6:26091179	C	G	Diastolic blood pressure	28739976	-0.465	9e-14	-	unit increase
	rs1799945	chr6:26091179	C	G	Diastolic blood pressure	28739976	-0.465	9e-14	-	unit increase
	rs10838684	chr11:47283862	A	G	Vascular or heart problems diagnosed by doctor: high blood pressure	UKBB	0.008763	8.27e-14	336683	risk diff
	rs10838684	chr11:47283862	A	G	Vascular or heart problems diagnosed by doctor: high blood pressure	UKBB	0.008763	8.27e-14	336683	risk diff
	rs8050136	chr16:53816275	A	C	Vascular or heart problems diagnosed by doctor: high blood pressure	UKBB	0.008279	6.99e-14	336683	risk diff
	rs9385404	chr6:127088591	A	G	Vascular or heart problems diagnosed by doctor: high blood pressure	UKBB	-0.009615	5.75e-14	336683	risk diff
	rs62033400	chr16:53811788	A	G	Vascular or heart problems diagnosed by doctor: high blood pressure	UKBB	-0.008345	4.48e-14	336683	risk diff
	rs62033400	chr16:53811788	A	G	Vascular or heart problems diagnosed by doctor: high blood pressure	UKBB	-0.008345	4.48e-14	336683	risk diff
	rs13107325	chr4:103188709	T	C	Systolic blood pressure	21909115	NA	3.27e-14	69395	-
	rs13107325	chr4:103188709	T	C	Systolic blood pressure	21909115	NA	3.27e-14	69395	-
	rs13107325	chr4:103188709	T	C	Systolic blood pressure	21909115	NA	3.27e-14	69395	-
	rs13107325	chr4:103188709	T	C	Systolic blood pressure	21909115	NA	3.27e-14	69395	-
	rs13107325	chr4:103188709	T	C	Systolic blood pressure	21909115	NA	3.27e-14	69395	-
	rs13107325	chr4:103188709	T	C	Systolic blood pressure	21909115	NA	3.27e-14	69395	-
	rs3184504	chr12:111884608	C	T	Diastolic blood pressure	19430479	-0.48	3e-14	-	mmHg increase
	rs3184504	chr12:111884608	C	T	Diastolic blood pressure	19430479	-0.48	3e-14	-	mmHg increase
	rs3184504	chr12:111884608	C	T	Diastolic blood pressure	19430479	-0.48	3e-14	-	mmHg increase
	rs1458038	chr4:81164723	T	C	Blood pressure	21909110	0.403	3e-14	-	mmHg increase
	rs13107325	chr4:103188709	T	C	Systolic blood pressure	21909115	0.981	3e-14	-	mmHg decrease
	rs13107325	chr4:103188709	T	C	Systolic blood pressure	21909115	0.981	3e-14	-	mmHg decrease
	rs13107325	chr4:103188709	T	C	Systolic blood pressure	21909115	0.981	3e-14	-	mmHg decrease
	rs13107325	chr4:103188709	T	C	Systolic blood pressure	21909115	0.981	3e-14	-	mmHg decrease
	rs13107325	chr4:103188709	T	C	Systolic blood pressure	21909115	0.981	3e-14	-	mmHg decrease
	rs13107325	chr4:103188709	T	C	Systolic blood pressure	21909115	0.981	3e-14	-	mmHg decrease
	rs3184504	chr12:111884608	C	T	Hypertension	21347282	NA	3e-14	8090	-
	rs3184504	chr12:111884608	C	T	Blood pressure	19430479	NA	3e-14	-	-
	rs1458038	chr4:81164723	T	C	Blood pressure	21909110	NA	3e-14	-	-
	rs3184504	chr12:111884608	C	T	Hypertension	21347282	NA	3e-14	8090	-
	rs3184504	chr12:111884608	C	T	Blood pressure	19430479	NA	3e-14	-	-
	rs3184504	chr12:111884608	C	T	Hypertension	21347282	NA	3e-14	8090	-
	rs3184504	chr12:111884608	C	T	Blood pressure	19430479	NA	3e-14	-	-
	rs1458038	chr4:81164723	T	C	Mean arterial pressure	21909110	NA	2.88e-14	74064	-
	rs3184504	chr12:111884608	C	T	Diastolic blood pressure	19430479	NA	2.58e-14	29136	-
	rs3184504	chr12:111884608	C	T	Diastolic blood pressure	21378095	NA	2.58e-14	7473	-
	rs3184504	chr12:111884608	C	T	Diastolic blood pressure	19430479	NA	2.58e-14	29136	-
	rs3184504	chr12:111884608	C	T	Diastolic blood pressure	21378095	NA	2.58e-14	7473	-
	rs3184504	chr12:111884608	C	T	Diastolic blood pressure	19430479	NA	2.58e-14	29136	-
	rs3184504	chr12:111884608	C	T	Diastolic blood pressure	21378095	NA	2.58e-14	7473	-
	rs3184504	chr12:111884608	C	T	Diastolic blood pressure	23202125	NA	2.33e-14	194427	-
	rs3184504	chr12:111884608	C	T	Diastolic blood pressure	21909115	NA	2.33e-14	69395	mmHg
	rs3184504	chr12:111884608	C	T	Diastolic blood pressure	23202125	NA	2.33e-14	194427	-
	rs3184504	chr12:111884608	C	T	Diastolic blood pressure	21909115	NA	2.33e-14	69395	mmHg
	rs3184504	chr12:111884608	C	T	Diastolic blood pressure	23202125	NA	2.33e-14	194427	-
	rs3184504	chr12:111884608	C	T	Diastolic blood pressure	21909115	NA	2.33e-14	69395	mmHg
	rs1458038	chr4:81164723	T	C	Diastolic blood pressure	26390057	0.4717	2e-14	-	mmHg increase
	rs12953014	chr17:47453444	A	G	Vascular or heart problems diagnosed by doctor: high blood pressure	UKBB	-0.00862	1.37e-14	336683	risk diff
	rs4480845	chr17:1958609	C	T	Systolic blood pressure	UKBB	-0.01994	1.06e-14	317754	IVNT
	rs10501320	chr11:47293799	C	G	Vascular or heart problems diagnosed by doctor: high blood pressure	UKBB	0.009483	9.61e-15	336683	risk diff
	rs10838681	chr11:47275064	A	G	Vascular or heart problems diagnosed by doctor: high blood pressure	UKBB	-0.009465	7.74e-15	336683	risk diff
	rs34071855	chr1:10798489	C	G	Systolic blood pressure	UKBB	-0.02031	6.42e-15	317754	IVNT
	rs1052373	chr11:47354787	T	C	Vascular or heart problems diagnosed by doctor: high blood pressure	UKBB	-0.009	6.34e-15	336683	risk diff
	rs56094641	chr16:53806453	A	G	Vascular or heart problems diagnosed by doctor: high blood pressure	UKBB	-0.008659	3.77e-15	336683	risk diff
	rs1799945	chr6:26091179	C	G	Diastolic blood pressure	21909115	-0.457	2e-15	-	mmHg increase
	rs1799945	chr6:26091179	C	G	Diastolic blood pressure	21909115	-0.457	2e-15	-	mmHg increase
	rs1799945	chr6:26091179	C	G	Blood pressure	21909115	NA	2e-15	-	-
	rs1799945	chr6:26091179	C	G	Blood pressure	21909115	NA	2e-15	-	-
	rs1458038	chr4:81164723	T	C	Diastolic blood pressure	21909110	NA	1.71e-15	74064	-
	rs9273453	chr6:32627812	C	G	Diastolic blood pressure	UKBB	0.03156	1.63e-15	317756	IVNT
	rs1799945	chr6:26091179	C	G	Diastolic blood pressure	21909115	NA	1.5e-15	69395	-
	rs1799945	chr6:26091179	C	G	Diastolic blood pressure	21909115	NA	1.5e-15	69395	-
	rs11065979	chr12:112059557	C	T	Systolic blood pressure	UKBB	-0.01987	1.29e-15	317754	IVNT
	rs3184504	chr12:111884608	C	T	Systolic blood pressure	21909110	NA	9.92e-16	74064	-
	rs3184504	chr12:111884608	C	T	Systolic blood pressure	21909110	NA	9.92e-16	74064	-
	rs3184504	chr12:111884608	C	T	Systolic blood pressure	21909110	NA	9.92e-16	74064	-
	rs4766502	chr12:111769641	T	G	Diastolic blood pressure	UKBB	-0.02344	9.47e-16	317756	IVNT
	rs1799945	chr6:26091179	C	G	Diastolic blood pressure	UKBB	-0.02764	8.75e-16	317756	IVNT
	rs1799945	chr6:26091179	C	G	Diastolic blood pressure	UKBB	-0.02764	8.75e-16	317756	IVNT
	rs198851	chr6:26104632	G	T	Diastolic blood pressure	UKBB	-0.02779	6.29e-16	317756	IVNT
	rs160838	chr19:11526759	G	A	Vascular or heart problems diagnosed by doctor: high blood pressure	UKBB	-0.009303	2.14e-16	336683	risk diff
	rs1458038	chr4:81164723	T	C	Systolic blood pressure	28739976	0.66	1e-16	-	unit increase
	rs1800562	chr6:26093141	A	G	Diastolic blood pressure	28739976	0.394	9e-17	-	unit increase
	rs1800562	chr6:26093141	A	G	Diastolic blood pressure	28739976	0.394	9e-17	-	unit increase
	rs1800562	chr6:26093141	A	G	Diastolic blood pressure	28739976	0.394	9e-17	-	unit increase
	rs1800562	chr6:26093141	A	G	Diastolic blood pressure	28739976	0.394	9e-17	-	unit increase
	rs10774624	chr12:111833788	A	G	Systolic blood pressure	UKBB	-0.0207	8.01e-17	317754	IVNT
	rs1458038	chr4:81164723	T	C	Diastolic blood pressure	28739976	0.403	8e-17	-	unit increase
	rs7076938	chr10:115789375	C	T	Diastolic blood pressure	27618447	NA	4.91e-17	192763	INVT
	rs12946454	chr17:43208121	A	T	Systolic blood pressure	UKBB	-0.02346	3.18e-17	317754	IVNT
	rs13107325	chr4:103188709	T	C	Diastolic blood pressure	21909115	NA	2.3e-17	69395	-
	rs13107325	chr4:103188709	T	C	Diastolic blood pressure	21909115	NA	2.3e-17	69395	-
	rs13107325	chr4:103188709	T	C	Diastolic blood pressure	21909115	NA	2.3e-17	69395	-
	rs13107325	chr4:103188709	T	C	Diastolic blood pressure	21909115	NA	2.3e-17	69395	-
	rs13107325	chr4:103188709	T	C	Diastolic blood pressure	21909115	NA	2.3e-17	69395	-
	rs13107325	chr4:103188709	T	C	Diastolic blood pressure	21909115	NA	2.3e-17	69395	-
	rs3184504	chr12:111884608	C	T	Systolic blood pressure	28739976	0.629	2e-17	-	unit decrease
	rs3184504	chr12:111884608	C	T	Systolic blood pressure	28739976	0.629	2e-17	-	unit decrease
	rs3184504	chr12:111884608	C	T	Systolic blood pressure	28739976	0.629	2e-17	-	unit decrease
	rs13107325	chr4:103188709	T	C	Diastolic blood pressure	21909115	0.684	2e-17	-	mmHg decrease
	rs13107325	chr4:103188709	T	C	Diastolic blood pressure	21909115	0.684	2e-17	-	mmHg decrease
	rs13107325	chr4:103188709	T	C	Diastolic blood pressure	21909115	0.684	2e-17	-	mmHg decrease
	rs13107325	chr4:103188709	T	C	Diastolic blood pressure	21909115	0.684	2e-17	-	mmHg decrease
	rs13107325	chr4:103188709	T	C	Diastolic blood pressure	21909115	0.684	2e-17	-	mmHg decrease
	rs13107325	chr4:103188709	T	C	Diastolic blood pressure	21909115	0.684	2e-17	-	mmHg decrease
	rs13107325	chr4:103188709	T	C	Blood pressure	21909115	NA	2e-17	-	-
	rs13107325	chr4:103188709	T	C	Blood pressure	21909115	NA	2e-17	-	-
	rs13107325	chr4:103188709	T	C	Blood pressure	21909115	NA	2e-17	-	-
	rs13107325	chr4:103188709	T	C	Blood pressure	21909115	NA	2e-17	-	-
	rs13107325	chr4:103188709	T	C	Blood pressure	21909115	NA	2e-17	-	-
	rs13107325	chr4:103188709	T	C	Blood pressure	21909115	NA	2e-17	-	-
	rs72812817	chr5:173356748	A	G	Diastolic blood pressure	UKBB	0.02294	1e-17	317756	IVNT
	rs72812817	chr5:173356748	A	G	Diastolic blood pressure	UKBB	0.02294	1e-17	317756	IVNT
	rs2773469	chr10:115798895	G	A	Diastolic blood pressure	UKBB	0.02399	9.55e-18	317756	IVNT
	rs598711	chr12:111973140	G	A	Diastolic blood pressure	UKBB	-0.02635	8.29e-18	317756	IVNT
	rs598710	chr12:111973141	C	A	Diastolic blood pressure	UKBB	-0.02636	8.06e-18	317756	IVNT
	rs7076938	chr10:115789375	C	T	Diastolic blood pressure	UKBB	-0.0241	6.75e-18	317756	IVNT
	rs3184504	chr12:111884608	C	T	Systolic blood pressure	21909115	NA	3.8e-18	69395	-
	rs3184504	chr12:111884608	C	T	Systolic blood pressure	21909115	NA	3.8e-18	69395	-
	rs3184504	chr12:111884608	C	T	Systolic blood pressure	21909115	NA	3.8e-18	69395	-
	rs597808	chr12:111973358	G	A	Systolic blood pressure	UKBB	-0.02144	3.74e-18	317754	IVNT
	rs3184504	chr12:111884608	C	T	Mean arterial pressure	21909110	NA	3.64e-18	74064	-
	rs3184504	chr12:111884608	C	T	Mean arterial pressure	21909110	NA	3.64e-18	74064	-
	rs3184504	chr12:111884608	C	T	Mean arterial pressure	21909110	NA	3.64e-18	74064	-
	rs9398815	chr6:127097775	C	T	Systolic blood pressure	UKBB	0.02157	3.1e-18	317754	IVNT
	rs9398815	chr6:127097775	C	T	Systolic blood pressure	UKBB	0.02157	3.1e-18	317754	IVNT
	rs9398815	chr6:127097775	C	T	Systolic blood pressure	UKBB	0.02157	3.1e-18	317754	IVNT
	rs3184504	chr12:111884608	C	T	Systolic blood pressure	UKBB	-0.02148	2.54e-18	317754	IVNT
	rs3184504	chr12:111884608	C	T	Systolic blood pressure	UKBB	-0.02148	2.54e-18	317754	IVNT
	rs3184504	chr12:111884608	C	T	Systolic blood pressure	UKBB	-0.02148	2.54e-18	317754	IVNT
	rs10849943	chr12:111819589	C	T	Diastolic blood pressure	UKBB	0.02651	1.77e-18	317756	IVNT
	rs9398815	chr6:127097775	C	T	Diastolic blood pressure	UKBB	0.0218	1.42e-18	317756	IVNT
	rs9398815	chr6:127097775	C	T	Diastolic blood pressure	UKBB	0.0218	1.42e-18	317756	IVNT
	rs9398815	chr6:127097775	C	T	Diastolic blood pressure	UKBB	0.0218	1.42e-18	317756	IVNT
	rs1250259	chr2:216300482	A	T	Pulse pressure	28135244	0.314	9e-19	-	unit decrease
	rs1250259	chr2:216300482	A	T	Pulse pressure	28135244	0.314	9e-19	-	unit decrease
	rs13107325	chr4:103188709	T	C	Diastolic blood pressure	UKBB	-0.04232	1.65e-19	317756	IVNT
	rs13107325	chr4:103188709	T	C	Diastolic blood pressure	UKBB	-0.04232	1.65e-19	317756	IVNT
	rs13107325	chr4:103188709	T	C	Diastolic blood pressure	UKBB	-0.04232	1.65e-19	317756	IVNT
	rs13107325	chr4:103188709	T	C	Diastolic blood pressure	UKBB	-0.04232	1.65e-19	317756	IVNT
	rs13107325	chr4:103188709	T	C	Diastolic blood pressure	UKBB	-0.04232	1.65e-19	317756	IVNT
	rs13107325	chr4:103188709	T	C	Diastolic blood pressure	UKBB	-0.04232	1.65e-19	317756	IVNT
	rs4897193	chr6:127208390	A	G	Vascular or heart problems diagnosed by doctor: high blood pressure	UKBB	0.009982	3.99e-20	336683	risk diff
	rs11065979	chr12:112059557	C	T	Vascular or heart problems diagnosed by doctor: high blood pressure	UKBB	-0.01003	3.93e-20	336683	risk diff
	rs3184504	chr12:111884608	C	T	Diastolic blood pressure	27618447	NA	2.95e-20	192763	INVT
	rs3184504	chr12:111884608	C	T	Diastolic blood pressure	27618447	NA	2.95e-20	192763	INVT
	rs3184504	chr12:111884608	C	T	Diastolic blood pressure	27618447	NA	2.95e-20	192763	INVT
	rs11187838	chr10:96038686	A	G	Diastolic blood pressure	UKBB	-0.02345	3.77e-21	317756	IVNT
	rs2773469	chr10:115798895	G	A	Vascular or heart problems diagnosed by doctor: high blood pressure	UKBB	0.01163	2.59e-21	336683	risk diff
	rs7076938	chr10:115789375	C	T	Vascular or heart problems diagnosed by doctor: high blood pressure	UKBB	-0.01165	2.34e-21	336683	risk diff
	rs1799945	chr6:26091179	C	G	Vascular or heart problems diagnosed by doctor: high blood pressure	UKBB	-0.0144	1.33e-21	336683	risk diff
	rs1799945	chr6:26091179	C	G	Vascular or heart problems diagnosed by doctor: high blood pressure	UKBB	-0.0144	1.33e-21	336683	risk diff
	rs198851	chr6:26104632	G	T	Vascular or heart problems diagnosed by doctor: high blood pressure	UKBB	-0.01446	9.53e-22	336683	risk diff
	rs12442901	chr15:75083912	A	G	Vascular or heart problems diagnosed by doctor: high blood pressure	UKBB	0.01193	2.78e-22	336683	risk diff
	rs11187838	chr10:96038686	A	G	Vascular or heart problems diagnosed by doctor: high blood pressure	UKBB	-0.01071	9.11e-23	336683	risk diff
	rs3184504	chr12:111884608	C	T	Diastolic blood pressure	21909110	NA	7.22e-23	74064	-
	rs3184504	chr12:111884608	C	T	Diastolic blood pressure	21909110	NA	7.22e-23	74064	-
	rs3184504	chr12:111884608	C	T	Diastolic blood pressure	21909110	NA	7.22e-23	74064	-
	rs11187838	chr10:96038686	A	G	Systolic blood pressure	UKBB	-0.02464	3.32e-23	317754	IVNT
	rs1458038	chr4:81164723	T	C	Systolic blood pressure	21909115	0.706	2e-23	-	mmHg increase
	rs1458038	chr4:81164723	T	C	Blood pressure	21909115	NA	2e-23	-	-
	rs1458038	chr4:81164723	T	C	Systolic blood pressure	21909115	NA	1.5e-23	69395	-
	rs10774624	chr12:111833788	A	G	Vascular or heart problems diagnosed by doctor: high blood pressure	UKBB	-0.01104	4.71e-24	336683	risk diff
	rs3184504	chr12:111884608	C	T	Diastolic blood pressure	28739976	0.457	3e-24	-	unit decrease
	rs3184504	chr12:111884608	C	T	Diastolic blood pressure	28739976	0.457	3e-24	-	unit decrease
	rs3184504	chr12:111884608	C	T	Diastolic blood pressure	28739976	0.457	3e-24	-	unit decrease
	rs1458038	chr4:81164723	T	C	Diastolic blood pressure	21909115	0.457	9e-25	-	mmHg increase
	rs1458038	chr4:81164723	T	C	Diastolic blood pressure	21909115	NA	8.5e-25	69395	-
	rs3184504	chr12:111884608	C	T	Diastolic blood pressure	21909115	-0.448	4e-25	-	mmHg increase
	rs3184504	chr12:111884608	C	T	Diastolic blood pressure	21909115	-0.448	4e-25	-	mmHg increase
	rs3184504	chr12:111884608	C	T	Diastolic blood pressure	21909115	-0.448	4e-25	-	mmHg increase
	rs3184504	chr12:111884608	C	T	Blood pressure	21909115	NA	4e-25	-	-
	rs3184504	chr12:111884608	C	T	Blood pressure	21909115	NA	4e-25	-	-
	rs3184504	chr12:111884608	C	T	Blood pressure	21909115	NA	4e-25	-	-
	rs3184504	chr12:111884608	C	T	Diastolic blood pressure	21909115	NA	3.6e-25	69395	-
	rs3184504	chr12:111884608	C	T	Diastolic blood pressure	21909115	NA	3.6e-25	69395	-
	rs3184504	chr12:111884608	C	T	Diastolic blood pressure	21909115	NA	3.6e-25	69395	-
	rs12442901	chr15:75083912	A	G	Diastolic blood pressure	UKBB	0.02978	1.86e-26	317756	IVNT
	rs9398815	chr6:127097775	C	T	Vascular or heart problems diagnosed by doctor: high blood pressure	UKBB	0.01193	5.99e-28	336683	risk diff
	rs9398815	chr6:127097775	C	T	Vascular or heart problems diagnosed by doctor: high blood pressure	UKBB	0.01193	5.99e-28	336683	risk diff
	rs9398815	chr6:127097775	C	T	Vascular or heart problems diagnosed by doctor: high blood pressure	UKBB	0.01193	5.99e-28	336683	risk diff
	rs597808	chr12:111973358	G	A	Vascular or heart problems diagnosed by doctor: high blood pressure	UKBB	-0.012	1.8e-28	336683	risk diff
	rs3184504	chr12:111884608	C	T	Vascular or heart problems diagnosed by doctor: high blood pressure	UKBB	-0.01205	7.3e-29	336683	risk diff
	rs3184504	chr12:111884608	C	T	Vascular or heart problems diagnosed by doctor: high blood pressure	UKBB	-0.01205	7.3e-29	336683	risk diff
	rs3184504	chr12:111884608	C	T	Vascular or heart problems diagnosed by doctor: high blood pressure	UKBB	-0.01205	7.3e-29	336683	risk diff
	rs34071855	chr1:10798489	C	G	Vascular or heart problems diagnosed by doctor: high blood pressure	UKBB	-0.01313	1.86e-30	336683	risk diff
	rs1458038	chr4:81164723	T	C	Diastolic blood pressure	UKBB	0.03315	2.33e-34	317756	IVNT
	rs11065979	chr12:112059557	C	T	Diastolic blood pressure	UKBB	-0.03313	1.66e-40	317756	IVNT
	rs1458038	chr4:81164723	T	C	Systolic blood pressure	UKBB	0.03648	2.62e-41	317754	IVNT
	rs10774624	chr12:111833788	A	G	Diastolic blood pressure	UKBB	-0.03682	1.27e-49	317756	IVNT
	rs3184504	chr12:111884608	C	T	Diastolic blood pressure	UKBB	-0.03826	1.74e-54	317756	IVNT
	rs3184504	chr12:111884608	C	T	Diastolic blood pressure	UKBB	-0.03826	1.74e-54	317756	IVNT
	rs3184504	chr12:111884608	C	T	Diastolic blood pressure	UKBB	-0.03826	1.74e-54	317756	IVNT
	rs597808	chr12:111973358	G	A	Diastolic blood pressure	UKBB	-0.03839	1.71e-54	317756	IVNT
	rs1458038	chr4:81164723	T	C	Vascular or heart problems diagnosed by doctor: high blood pressure	UKBB	0.02038	1.11e-65	336683	risk diff
BMI	rs1412234	chr9:28410683	C	T	Body mass index in non-smokers	28443625	0.0262	4.97e-08	128884	IVNT
	rs1412234	chr9:28410683	C	T	Body mass index in non-smokers	28443625	0.0262	4.97e-08	128884	IVNT
	rs2613505	chr1:72835410	T	C	Body mass index in physically active indivdiuals	28448500	0.0287	4.94e-08	149250	IVNT
	rs55936433	chr17:47036042	A	C	Body mass index	UKBB	-0.01454	4.93e-08	336107	IVNT
	rs2613505	chr1:72835410	T	C	Body mass index adjsuted for physical activity in males	28448500	0.038	4.89e-08	84010	IVNT
	rs10811660	chr9:22134068	A	G	Body mass index females	28892062	0.03196	4.83e-08	82438	IVNT
	rs1412234	chr9:28410683	C	T	Body mass index in non-smokers	28443625	0.0247	4.82e-08	147418	IVNT
	rs1412234	chr9:28410683	C	T	Body mass index in non-smokers	28443625	0.0247	4.82e-08	147418	IVNT
	rs1861410	chr2:58933591	T	C	Body mass index	28892062	-0.01976	4.81e-08	173430	IVNT
	rs1861410	chr2:58933591	T	C	Body mass index	28892062	-0.01976	4.81e-08	173430	IVNT
	rs2510344	chr18:21113285	T	C	Body mass index	25673413	0.0202	4.78e-08	233832	IVNT
	rs2112347	chr5:75015242	G	T	Body mass index	20935630	NA	4.76e-08	123863	IVNT
	rs8081714	chr17:66001130	A	G	Body mass index	UKBB	0.01582	4.74e-08	336107	IVNT
	rs7141420	chr14:79899454	C	T	Body mass index	23754948	-0.02394	4.55e-08	126487	IVNT
	rs2229616	chr18:58039276	T	C	Body mass index in physically active females	28448500	-0.1036	4.52e-08	83688	IVNT
	rs7132908	chr12:50263148	A	G	Body mass index in physically active indivdiuals	28448500	0.0284	4.45e-08	96872	IVNT
	rs7132908	chr12:50263148	A	G	Body mass index in physically active indivdiuals	28448500	0.0284	4.45e-08	96872	IVNT
	rs1652343	chr18:21131929	T	C	Body mass index	25673413	0.0197	4.44e-08	236132	IVNT
	rs7575523	chr2:59335104	G	T	Body mass index ajusted for physical activity in females	28448500	-0.0293	4.42e-08	87418	IVNT
	rs8050136	chr16:53816275	A	C	Body mass index	21037115	NA	4.14e-08	3205	-
	rs2531995	chr16:4013467	T	C	Body mass index 30 kgm2	23563607	NA	4.04e-08	16068	-
	rs1516725	chr3:185824004	C	T	Body mass index	23563607	NA	4e-08	-	-
	rs7903146	chr10:114758349	C	T	Body mass index joint analysis main effects and smoking interaction	28443625	NA	4e-08	-	-
	rs7903146	chr10:114758349	C	T	Body mass index joint analysis main effects and smoking interaction	28443625	NA	4e-08	-	-
	rs7903146	chr10:114758349	C	T	Body mass index joint analysis main effects and smoking interaction	28443625	NA	4e-08	-	-
	rs7903146	chr10:114758349	C	T	Body mass index joint analysis main effects and smoking interaction	28443625	NA	4e-08	-	-
	rs7903146	chr10:114758349	C	T	Body mass index joint analysis main effects and smoking interaction	28443625	NA	4e-08	-	-
	rs1121980	chr16:53809247	G	A	Body mass index	18454148	NA	4e-08	-	-
	rs1121980	chr16:53809247	G	A	Body mass index	18454148	NA	4e-08	-	-
	rs1516725	chr3:185824004	C	T	Body mass index	23563607	NA	4e-08	-	-
	rs17309930	chr11:27748493	A	C	Body mass index adjusted for smoking in females	28443625	0.03	3.98e-08	135774	IVNT
	rs12641981	chr4:45179883	C	T	Body mass index in physically active females	28448500	-0.0287	3.85e-08	88716	IVNT
	rs12641981	chr4:45179883	C	T	Body mass index in physically active females	28448500	-0.0287	3.85e-08	88716	IVNT
	rs1652344	chr18:21128857	T	C	Body mass index	25673413	0.0198	3.8e-08	236142	IVNT
	rs13192618	chr6:163132822	C	T	Body mass index adjusted for physical activity	28448500	-0.0295	3.74e-08	198667	IVNT
	rs2531995	chr16:4013467	T	C	Body mass index adjusted for smoking	28443625	0.0244	3.66e-08	139301	IVNT
	rs2303108	chr19:47589895	C	T	Body mass index adjusted for physical activity	28448500	0.0211	3.61e-08	193853	IVNT
	rs10513801	chr3:185822353	G	T	Body mass index tails	23563607	-0.25	3.6e-08	10502	log OR
	rs1037169	chr11:13361005	T	C	Body mass index	UKBB	-0.01432	3.6e-08	336107	IVNT
	rs1037169	chr11:13361005	T	C	Body mass index	UKBB	-0.01432	3.6e-08	336107	IVNT
	rs7548184	chr1:209531600	C	T	Body mass index	UKBB	-0.01955	3.59e-08	336107	IVNT
	rs12790913	chr11:27511998	A	G	Body mass index adjusted for smoking in males	28443625	0.0303	3.48e-08	102193	IVNT
	rs17419291	chr5:87780432	C	T	Body mass index	UKBB	-0.0235	3.46e-08	336107	IVNT
	rs12577586	chr11:27600435	C	T	Body mass index in females greater than 50 years of age	26426971	0.03	3.4e-08	104954	IVNT
	rs1457489	chr18:57861961	A	G	Body mass index	21935397	NA	3.34e-08	5373	-
	rs2112347	chr5:75015242	G	T	Body mass index in females greater than 50 years of age	26426971	-0.026	3.3e-08	104963	IVNT
	rs34348	chr5:75041946	A	G	Body mass index	UKBB	-0.01344	3.3e-08	336107	IVNT
	rs7941030	chr11:122522375	C	T	Body mass index	UKBB	0.01362	3.3e-08	336107	IVNT
	rs2112347	chr5:75015242	G	T	Body mass index in male non-smokers	28443625	-0.03	3.26e-08	77635	IVNT
	rs7613875	chr3:49971514	A	C	Body mass index adjusted for smoking	28443625	0.0182	3.26e-08	230128	IVNT
	rs11030107	chr11:27694835	A	G	Body mass index in females greater than 50 years of age	26426971	-0.029	3.2e-08	104969	IVNT
	rs10892870	chr11:122517803	A	G	Body mass index	UKBB	-0.01364	3.16e-08	336107	IVNT
	rs10892870	chr11:122517803	A	G	Body mass index	UKBB	-0.01364	3.16e-08	336107	IVNT
	rs2307111	chr5:75003678	T	C	Body mass index in physically active indivdiuals	28448500	0.0233	3.13e-08	136714	IVNT
	rs2307111	chr5:75003678	T	C	Body mass index in physically active indivdiuals	28448500	0.0233	3.13e-08	136714	IVNT
	rs2307111	chr5:75003678	T	C	Body mass index in physically active indivdiuals	28448500	0.0233	3.13e-08	136714	IVNT
	rs1873449	chr10:122931652	T	G	Body mass index	28892062	0.02267	3.11e-08	173430	IVNT
	rs13192618	chr6:163132822	C	T	Body mass index	25673413	-0.0247	3.09e-08	339174	IVNT
	rs2229616	chr18:58039276	T	C	Body mass index in non-smokers	28443625	-0.0898	3.07e-08	124817	IVNT
	rs1613599	chr2:58966760	T	C	Body mass index	25673413	0.0205	3.02e-08	233920	IVNT
	rs1613599	chr2:58966760	T	C	Body mass index	25673413	0.0205	3.02e-08	233920	IVNT
	rs7132908	chr12:50263148	A	G	Body mass index adjusted for smoking in females	28443625	0.0294	3e-08	98488	IVNT
	rs7132908	chr12:50263148	A	G	Body mass index adjusted for smoking in females	28443625	0.0294	3e-08	98488	IVNT
	rs7141420	chr14:79899454	C	T	Body mass index in females less than or equal to 50 years of age	26426971	-0.033	2.8e-08	63716	IVNT
	rs1613599	chr2:58966760	T	C	Body mass index	25673413	0.02	2.77e-08	236082	IVNT
	rs1613599	chr2:58966760	T	C	Body mass index	25673413	0.02	2.77e-08	236082	IVNT
	rs2510344	chr18:21113285	T	C	Body mass index	25673413	0.02	2.77e-08	235994	IVNT
	rs7580777	chr2:50695601	G	T	Body mass index	UKBB	0.01358	2.73e-08	336107	IVNT
	rs661311	chr5:88034867	C	T	Body mass index	UKBB	0.01625	2.69e-08	336107	IVNT
	rs11030107	chr11:27694835	A	G	Body mass index	23754948	-0.02813	2.6e-08	126576	IVNT
	rs11727676	chr4:145659064	C	T	Body mass index	25673413	-0.0358	2.55e-08	296401	IVNT
	rs11727676	chr4:145659064	C	T	Body mass index	25673413	-0.0358	2.55e-08	296401	IVNT
	rs11727676	chr4:145659064	C	T	Body mass index	25673413	-0.0358	2.55e-08	296401	IVNT
	rs11727676	chr4:145659064	C	T	Body mass index	25673413	-0.0358	2.55e-08	296401	IVNT
	rs55931203	chr17:65854602	C	T	Body mass index	28892062	-0.02303	2.51e-08	173430	IVNT
	rs7684939	chr4:55509189	A	G	Body mass index	UKBB	-0.01338	2.51e-08	336107	IVNT
	rs7684939	chr4:55509189	A	G	Body mass index	UKBB	-0.01338	2.51e-08	336107	IVNT
	rs1519480	chr11:27675712	C	T	Body mass index in male non-smokers	28443625	0.0318	2.51e-08	78094	IVNT
	rs979525	chr9:28480661	A	C	Body mass index	UKBB	0.01607	2.48e-08	336107	IVNT
	rs2112347	chr5:75015242	G	T	Body mass index in physically active indivdiuals	28448500	-0.024	2.4e-08	138152	IVNT
	rs17066842	chr18:58040624	A	G	Body mass index in males	25673413	-0.0614	2.39e-08	142629	IVNT
	rs6507720	chr18:21119291	A	G	Body mass index in females	25673413	0.0257	2.31e-08	132083	IVNT
	rs2307111	chr5:75003678	T	C	Body mass index in male non-smokers	28443625	0.0302	2.25e-08	76598	IVNT
	rs2307111	chr5:75003678	T	C	Body mass index in male non-smokers	28443625	0.0302	2.25e-08	76598	IVNT
	rs2307111	chr5:75003678	T	C	Body mass index in male non-smokers	28443625	0.0302	2.25e-08	76598	IVNT
	rs28421137	chr5:139037130	A	G	Body mass index	UKBB	-0.01401	2.24e-08	336107	IVNT
	rs7825052	chr8:64838178	A	G	Body mass index	UKBB	0.01349	2.24e-08	336107	IVNT
	rs9268686	chr6:32415522	C	T	Body mass index	28892062	0.02016	2.14e-08	173430	IVNT
	rs6486122	chr11:13361524	C	T	Body mass index	UKBB	-0.01455	2.12e-08	336107	IVNT
	rs7542974	chr1:72544704	A	G	Body mass index	23754948	0.0301	2.1e-08	126384	IVNT
	rs1516725	chr3:185824004	C	T	Body mass index tails	23563607	0.26	2.1e-08	10502	log OR
	rs1516725	chr3:185824004	C	T	Body mass index tails	23563607	0.26	2.1e-08	10502	log OR
	rs2431109	chr5:103945126	G	A	Body mass index	UKBB	0.01356	2.08e-08	336107	IVNT
	rs11171739	chr12:56470625	C	T	Body mass index	UKBB	-0.01358	2.07e-08	336107	IVNT
	rs288159	chr5:107364363	T	C	Body mass index	UKBB	-0.01431	2.06e-08	336107	IVNT
	rs1516725	chr3:185824004	C	T	BMI tails upper and lower 5th percentiles	23563607	NA	2.06e-08	16068	-
	rs1516725	chr3:185824004	C	T	BMI tails upper and lower 5th percentiles	23563607	NA	2.06e-08	16068	-
	rs2112347	chr5:75015242	G	T	Body mass index in physically active individuals	28448500	-0.024	2e-08	-	kg/m
	rs11708067	chr3:123065778	A	G	Body mass index	29273807	-0.014	2e-08	526508	IVNT
	rs11708067	chr3:123065778	A	G	Body mass index	29273807	-0.014	2e-08	526508	IVNT
	rs11708067	chr3:123065778	A	G	Body mass index	29273807	-0.014	2e-08	526508	IVNT
	rs11708067	chr3:123065778	A	G	Body mass index	29273807	-0.014	2e-08	526508	IVNT
	rs11708067	chr3:123065778	A	G	Body mass index	29273807	-0.014	2e-08	526508	IVNT
	rs11708067	chr3:123065778	A	G	Body mass index	29273807	-0.014	2e-08	526508	IVNT
	rs11708067	chr3:123065778	A	G	Body mass index	29273807	-0.014	2e-08	526508	IVNT
	rs11083779	chr19:46204878	C	T	Body mass index	UKBB	-0.03392	1.99e-08	336107	IVNT
	rs147935170	chr12:123882462	C	T	Body mass index	UKBB	0.03171	1.98e-08	336107	IVNT
	rs2943652	chr2:227108446	C	T	Body mass index in males	25673413	0.0236	1.97e-08	150934	IVNT
	rs2307111	chr5:75003678	T	C	Body mass index in non-smokers	28443625	0.0237	1.94e-08	142132	IVNT
	rs2307111	chr5:75003678	T	C	Body mass index in non-smokers	28443625	0.0237	1.94e-08	142132	IVNT
	rs2307111	chr5:75003678	T	C	Body mass index in non-smokers	28443625	0.0237	1.94e-08	142132	IVNT
	rs34149579	chr12:123345509	G	T	Body mass index	29273807	0.027	1.9e-08	526508	IVNT
	rs1516725	chr3:185824004	C	T	Body mass index in males greater than 50 years of age	26426971	0.042	1.9e-08	90469	IVNT
	rs1516725	chr3:185824004	C	T	Body mass index in males greater than 50 years of age	26426971	0.042	1.9e-08	90469	IVNT
	rs1554622	chr2:219606218	T	G	Body mass index in males	25673413	-0.0227	1.86e-08	152768	IVNT
	rs17066842	chr18:58040624	A	G	Body mass index in physically active indivdiuals	28448500	-0.0615	1.84e-08	134204	IVNT
	rs7132908	chr12:50263148	A	G	Body mass index	21935397	NA	1.83e-08	5373	-
	rs7132908	chr12:50263148	A	G	Body mass index	21935397	NA	1.83e-08	5373	-
	rs11635675	chr15:63793238	G	T	Body mass index	UKBB	-0.01423	1.82e-08	336107	IVNT
	rs11635675	chr15:63793238	G	T	Body mass index	UKBB	-0.01423	1.82e-08	336107	IVNT
	rs11635675	chr15:63793238	G	T	Body mass index	UKBB	-0.01423	1.82e-08	336107	IVNT
	rs12641981	chr4:45179883	C	T	Body mass index in males	23754948	-0.038	1.81e-08	58610	IVNT
	rs12641981	chr4:45179883	C	T	Body mass index in males	23754948	-0.038	1.81e-08	58610	IVNT
	rs3822072	chr4:89741269	G	A	Body mass index	22885924	NA	1.8e-08	133010	-
	rs2112347	chr5:75015242	G	T	Body mass index in physically active indivdiuals	28448500	-0.0231	1.71e-08	149857	IVNT
	rs12577586	chr11:27600435	C	T	Body mass index in males greater than 50 years of age	26426971	0.033	1.7e-08	91965	IVNT
	rs2112653	chr5:74562564	T	C	Body mass index	28892062	0.02043	1.66e-08	173430	IVNT
	rs8182243	chr17:66018505	C	T	Body mass index	UKBB	-0.01559	1.63e-08	336107	IVNT
	rs6445541	chr3:52880128	G	T	Body mass index	UKBB	-0.01396	1.63e-08	336107	IVNT
	rs76438740	chr1:209539726	A	G	Body mass index	UKBB	0.02018	1.63e-08	336107	IVNT
	rs10457180	chr6:108965039	A	G	Body mass index	UKBB	0.0149	1.6e-08	336107	IVNT
	rs2510344	chr18:21113285	T	C	Body mass index in females	25673413	0.026	1.58e-08	132026	IVNT
	rs7132908	chr12:50263148	A	G	Body mass index 35 kgm2	23563607	NA	1.49e-08	16068	-
	rs7132908	chr12:50263148	A	G	Body mass index 35 kgm2	23563607	NA	1.49e-08	16068	-
	rs2112347	chr5:75015242	G	T	Body mass index	23754948	-0.02603	1.47e-08	126574	IVNT
	rs1516725	chr3:185824004	C	T	Body mass index in female non-smokers	28443625	0.0382	1.44e-08	111734	IVNT
	rs1516725	chr3:185824004	C	T	Body mass index in female non-smokers	28443625	0.0382	1.44e-08	111734	IVNT
	rs1861410	chr2:58933591	T	C	Body mass index	25673413	-0.021	1.38e-08	233873	IVNT
	rs1861410	chr2:58933591	T	C	Body mass index	25673413	-0.021	1.38e-08	233873	IVNT
	rs12916	chr5:74656539	C	T	Body mass index	25673413	-0.0172	1.34e-08	332649	IVNT
	rs2943646	chr2:227099534	A	G	Body mass index in males	25673413	0.0237	1.31e-08	152795	IVNT
	rs2943646	chr2:227099534	A	G	Body mass index in males	25673413	0.0237	1.31e-08	152795	IVNT
	rs2943646	chr2:227099534	A	G	Body mass index in males	25673413	0.0237	1.31e-08	152795	IVNT
	rs2943646	chr2:227099534	A	G	Body mass index in males	25673413	0.0237	1.31e-08	152795	IVNT
	rs10513801	chr3:185822353	G	T	Body mass index in males greater than 50 years of age	26426971	-0.042	1.3e-08	89698	IVNT
	rs11030107	chr11:27694835	A	G	Body mass index in males greater than 50 years of age	26426971	-0.032	1.3e-08	91972	IVNT
	rs11711421	chr3:52561779	C	T	Body mass index	28892062	-0.02051	1.3e-08	173430	IVNT
	rs2307111	chr5:75003678	T	C	Body mass index in physically active indivdiuals	28448500	0.0231	1.29e-08	148700	IVNT
	rs2307111	chr5:75003678	T	C	Body mass index in physically active indivdiuals	28448500	0.0231	1.29e-08	148700	IVNT
	rs2307111	chr5:75003678	T	C	Body mass index in physically active indivdiuals	28448500	0.0231	1.29e-08	148700	IVNT
	rs676387	chr17:40706273	C	A	Body mass index	UKBB	-0.0151	1.27e-08	336107	IVNT
	rs646123	chr17:40720632	G	A	Body mass index	UKBB	-0.01512	1.26e-08	336107	IVNT
	rs2112347	chr5:75015242	G	T	Body mass index 25 kgm2	23563607	NA	1.25e-08	16068	-
	rs12641981	chr4:45179883	C	T	Body mass index in male non-smokers	28443625	-0.0312	1.24e-08	78072	IVNT
	rs12641981	chr4:45179883	C	T	Body mass index in male non-smokers	28443625	-0.0312	1.24e-08	78072	IVNT
	rs2943645	chr2:227099180	C	T	Body mass index in males	25673413	0.0238	1.24e-08	152856	IVNT
	rs8101091	chr19:47600601	A	G	Body mass index	25673413	-0.0262	1.23e-08	221401	IVNT
	rs769449	chr19:45410002	A	G	Body mass index	UKBB	-0.02054	1.2e-08	336107	IVNT
	rs11554159	chr19:18285944	A	G	Body mass index	UKBB	0.01543	1.2e-08	336107	IVNT
	rs7141420	chr14:79899454	C	T	Body mass index in female non-smokers	28443625	-0.0263	1.19e-08	110310	IVNT
	rs2303108	chr19:47589895	C	T	Body mass index in non-smokers	28443625	0.0236	1.18e-08	165497	IVNT
	rs10199876	chr2:283794	A	T	Body mass index	UKBB	-0.01521	1.16e-08	336107	IVNT
	rs62246311	chr3:9498143	A	G	Body mass index	UKBB	0.02272	1.16e-08	336107	IVNT
	rs62246311	chr3:9498143	A	G	Body mass index	UKBB	0.02272	1.16e-08	336107	IVNT
	rs7132908	chr12:50263148	A	G	Body mass index	20935630	NA	1.16e-08	67240	IVNT
	rs7132908	chr12:50263148	A	G	Body mass index	20935630	NA	1.16e-08	123865	-
	rs7132908	chr12:50263148	A	G	Body mass index	20935630	NA	1.16e-08	67240	IVNT
	rs7132908	chr12:50263148	A	G	Body mass index	20935630	NA	1.16e-08	123865	-
	rs2613505	chr1:72835410	T	C	Body mass index in males greater than 50 years of age	26426971	0.037	1.1e-08	91755	IVNT
	rs1652343	chr18:21131929	T	C	Body mass index in females	25673413	0.0263	1.08e-08	132090	IVNT
	rs12577586	chr11:27600435	C	T	Body mass index in non-smokers	28443625	0.024	1.07e-08	189599	IVNT
	rs12790913	chr11:27511998	A	G	Body mass index in non-smokers	28443625	0.0242	1.07e-08	189454	IVNT
	rs1412234	chr9:28410683	C	T	Body mass index	23754948	0.02754	1e-08	126558	IVNT
	rs1412234	chr9:28410683	C	T	Body mass index	23754948	0.02754	1e-08	126558	IVNT
	rs2112347	chr5:75015242	G	T	Body mass index joint analysis main effects and physical activity interaction	28448500	NA	1e-08	-	-
	rs1412234	chr9:28410683	C	T	Body mass index	25673413	0.0235	9.94e-09	233020	IVNT
	rs1412234	chr9:28410683	C	T	Body mass index	25673413	0.0235	9.94e-09	233020	IVNT
	rs34138141	chr17:40781561	G	T	Body mass index	UKBB	-0.01529	9.87e-09	336107	IVNT
	rs34855406	chr17:40731411	C	G	Body mass index	UKBB	0.01529	9.79e-09	336107	IVNT
	rs7656088	chr4:55499537	C	T	Body mass index	UKBB	0.01377	9.75e-09	336107	IVNT
	rs4818008	chr21:40611442	A	T	Body mass index	UKBB	0.0144	9.53e-09	336107	IVNT
	rs34149579	chr12:123345509	G	T	Body mass index	29273807	0.028	9.4e-09	449889	IVNT
	rs1427445	chr2:219555573	A	C	Body mass index in males	25673413	0.0232	8.98e-09	152862	IVNT
	rs11708067	chr3:123065778	A	G	Body mass index	29273807	-0.016	8.9e-09	449889	IVNT
	rs11708067	chr3:123065778	A	G	Body mass index	29273807	-0.016	8.9e-09	449889	IVNT
	rs11708067	chr3:123065778	A	G	Body mass index	29273807	-0.016	8.9e-09	449889	IVNT
	rs11708067	chr3:123065778	A	G	Body mass index	29273807	-0.016	8.9e-09	449889	IVNT
	rs11708067	chr3:123065778	A	G	Body mass index	29273807	-0.016	8.9e-09	449889	IVNT
	rs11708067	chr3:123065778	A	G	Body mass index	29273807	-0.016	8.9e-09	449889	IVNT
	rs11708067	chr3:123065778	A	G	Body mass index	29273807	-0.016	8.9e-09	449889	IVNT
	rs12916	chr5:74656539	C	T	Body mass index	28892062	-0.02041	8.87e-09	173430	IVNT
	rs6545714	chr2:59307725	A	G	Body mass index	25673413	-0.018	8.87e-09	322103	IVNT
	rs111789331	chr19:45427125	A	T	Body mass index	UKBB	-0.01926	8.7e-09	336107	IVNT
	rs111789331	chr19:45427125	A	T	Body mass index	UKBB	-0.01926	8.7e-09	336107	IVNT
	rs10459574	chr14:104083042	C	G	Body mass index	UKBB	-0.01562	8.61e-09	336107	IVNT
	rs67868323	chr19:4048561	G	T	Body mass index	UKBB	-0.01557	8.61e-09	336107	IVNT
	rs1519480	chr11:27675712	C	T	Body mass index in females greater than 50 years of age	26426971	0.029	8.6e-09	105168	IVNT
	rs7132908	chr12:50263148	A	G	Body mass index in males	25673413	0.0357	8.51e-09	75667	IVNT
	rs7132908	chr12:50263148	A	G	Body mass index in males	25673413	0.0357	8.51e-09	75667	IVNT
	rs1652344	chr18:21128857	T	C	Body mass index in females	25673413	0.0265	8.37e-09	132095	IVNT
	rs11201985	chr10:88097795	A	G	Body mass index	UKBB	0.01398	8.05e-09	336107	IVNT
	rs12454712	chr18:60845884	C	T	Body mass index	UKBB	0.01432	7.62e-09	336107	IVNT
	rs12454712	chr18:60845884	C	T	Body mass index	UKBB	0.01432	7.62e-09	336107	IVNT
	rs12454712	chr18:60845884	C	T	Body mass index	UKBB	0.01432	7.62e-09	336107	IVNT
	rs12454712	chr18:60845884	C	T	Body mass index	UKBB	0.01432	7.62e-09	336107	IVNT
	rs12454712	chr18:60845884	C	T	Body mass index	UKBB	0.01432	7.62e-09	336107	IVNT
	rs12454712	chr18:60845884	C	T	Body mass index	UKBB	0.01432	7.62e-09	336107	IVNT
	rs791399	chr8:64706538	T	C	Body mass index	UKBB	0.01391	7.58e-09	336107	IVNT
	rs8101091	chr19:47600601	A	G	Body mass index	25673413	-0.026	7.57e-09	223563	IVNT
	rs12916	chr5:74656539	C	T	Body mass index	25673413	-0.0182	7.3e-09	315585	IVNT
	rs1516725	chr3:185824004	C	T	Body mass index in smokers	28443625	0.058	7.27e-09	50318	IVNT
	rs1516725	chr3:185824004	C	T	Body mass index in smokers	28443625	0.058	7.27e-09	50318	IVNT
	rs11624759	chr14:29746964	A	C	Body mass index	UKBB	-0.01451	7.25e-09	336107	IVNT
	rs1519480	chr11:27675712	C	T	Body mass index in female non-smokers	28443625	0.0284	7.16e-09	112059	IVNT
	rs7132908	chr12:50263148	A	G	Body mass index in females less than or equal to 50 years of age	26426971	0.044	7.1e-09	46677	IVNT
	rs7132908	chr12:50263148	A	G	Body mass index in females less than or equal to 50 years of age	26426971	0.044	7.1e-09	46677	IVNT
	rs1457489	chr18:57861961	A	G	Body mass index in female smokers	28443625	0.0594	7.09e-09	26308	IVNT
	rs1516725	chr3:185824004	C	T	BMI in smokers	28443625	-0.058	7e-09	-	kg/m
	rs1516725	chr3:185824004	C	T	BMI in smokers	28443625	-0.058	7e-09	-	kg/m
	rs11257655	chr10:12307894	C	T	Body mass index	28892062	-0.015	7e-09	-	kg/m
	rs11257655	chr10:12307894	C	T	Body mass index	28892062	-0.015	7e-09	-	kg/m
	rs2229616	chr18:58039276	T	C	Body mass index in physically active indivdiuals	28448500	-0.0916	6.75e-09	128230	IVNT
	rs7903146	chr10:114758349	C	T	Body mass index in male non-smokers	28443625	0.0341	6.75e-09	78079	IVNT
	rs7903146	chr10:114758349	C	T	Body mass index in male non-smokers	28443625	0.0341	6.75e-09	78079	IVNT
	rs7903146	chr10:114758349	C	T	Body mass index in male non-smokers	28443625	0.0341	6.75e-09	78079	IVNT
	rs7903146	chr10:114758349	C	T	Body mass index in male non-smokers	28443625	0.0341	6.75e-09	78079	IVNT
	rs7903146	chr10:114758349	C	T	Body mass index in male non-smokers	28443625	0.0341	6.75e-09	78079	IVNT
	rs559623	chr18:57843875	C	A	Body mass index adjusted for smoking in females	28443625	0.0277	6.69e-09	108669	IVNT
	rs6499240	chr16:69686912	A	G	Body mass index in non-smokers	28443625	-0.0258	6.64e-09	131521	IVNT
	rs6499240	chr16:69686912	A	G	Body mass index in non-smokers	28443625	-0.0258	6.64e-09	131521	IVNT
	rs7998275	chr13:31010344	C	G	Body mass index	UKBB	-0.01448	6.59e-09	336107	IVNT
	rs10513801	chr3:185822353	G	T	Body mass index in female non-smokers	28443625	-0.0425	6.52e-09	106765	IVNT
	rs16826087	chr1:39812518	C	T	Body mass index	UKBB	-0.01708	6.49e-09	336107	IVNT
	rs1861410	chr2:58933591	T	C	Body mass index	25673413	-0.0209	6.41e-09	236035	IVNT
	rs1861410	chr2:58933591	T	C	Body mass index	25673413	-0.0209	6.41e-09	236035	IVNT
	rs8107376	chr19:46163769	C	T	Body mass index males	28892062	-0.02958	6.35e-09	90992	IVNT
	rs11727676	chr4:145659064	C	T	Body mass index	25673413	-0.0365	6.25e-09	311073	IVNT
	rs11727676	chr4:145659064	C	T	Body mass index	25673413	-0.0365	6.25e-09	311073	IVNT
	rs11727676	chr4:145659064	C	T	Body mass index	25673413	-0.0365	6.25e-09	311073	IVNT
	rs11727676	chr4:145659064	C	T	Body mass index	25673413	-0.0365	6.25e-09	311073	IVNT
	rs8076753	chr17:66022841	A	G	Body mass index	UKBB	0.01718	6.18e-09	336107	IVNT
	rs1519480	chr11:27675712	C	T	Body mass index ajusted for physical activity in females	28448500	0.0281	6.11e-09	115949	IVNT
	rs17066842	chr18:58040624	A	G	Body mass index adjusted for smoking	28443625	-0.0495	6.09e-09	184451	IVNT
	rs2112347	chr5:75015242	G	T	Body mass index males	28892062	-0.02831	6.06e-09	90992	IVNT
	rs11727676	chr4:145659064	C	T	Body mass index	25673413	-0.037	6e-09	-	kg/m2 increase
	rs11727676	chr4:145659064	C	T	Body mass index	25673413	-0.037	6e-09	-	kg/m2 increase
	rs11727676	chr4:145659064	C	T	Body mass index	25673413	-0.037	6e-09	-	kg/m2 increase
	rs11727676	chr4:145659064	C	T	Body mass index	25673413	-0.037	6e-09	-	kg/m2 increase
	rs1899951	chr3:12394840	T	C	Body mass index	28892062	0.024	6e-09	-	kg/m
	rs373687	chr21:46558780	C	T	Body mass index	UKBB	0.0146	5.98e-09	336107	IVNT
	rs11030107	chr11:27694835	A	G	Body mass index adjusted for smoking in males	28443625	-0.0317	5.83e-09	102219	IVNT
	rs17309930	chr11:27748493	A	C	Body mass index adjusted for physical activity	28448500	0.0263	5.83e-09	200351	IVNT
	rs2613505	chr1:72835410	T	C	Body mass index adjusted for physical activity	28448500	0.0285	5.78e-09	179212	IVNT
	rs35468353	chr16:31056433	G	A	Body mass index	UKBB	0.01443	5.77e-09	336107	IVNT
	rs17055001	chr9:92195246	A	G	Body mass index	UKBB	0.01512	5.77e-09	336107	IVNT
	rs2307111	chr5:75003678	T	C	Body mass index males	28892062	0.02816	5.56e-09	90992	IVNT
	rs2307111	chr5:75003678	T	C	Body mass index males	28892062	0.02816	5.56e-09	90992	IVNT
	rs2307111	chr5:75003678	T	C	Body mass index males	28892062	0.02816	5.56e-09	90992	IVNT
	rs34872471	chr10:114754071	C	T	Body mass index	UKBB	-0.01543	5.44e-09	336107	IVNT
	rs559623	chr18:57843875	C	A	Body mass index in males greater than 50 years of age	26426971	0.031	5.4e-09	73860	IVNT
	rs2307111	chr5:75003678	T	C	Body mass index adjusted for smoking	28443625	0.0213	5.27e-09	186317	IVNT
	rs2307111	chr5:75003678	T	C	Body mass index adjusted for smoking	28443625	0.0213	5.27e-09	186317	IVNT
	rs2307111	chr5:75003678	T	C	Body mass index adjusted for smoking	28443625	0.0213	5.27e-09	186317	IVNT
	rs2307111	chr5:75003678	T	C	Body mass index adjusted for physical activity	28448500	0.0226	5.1e-09	175036	IVNT
	rs2307111	chr5:75003678	T	C	Body mass index adjusted for physical activity	28448500	0.0226	5.1e-09	175036	IVNT
	rs2307111	chr5:75003678	T	C	Body mass index adjusted for physical activity	28448500	0.0226	5.1e-09	175036	IVNT
	rs717684	chr2:181335796	T	G	Body mass index	UKBB	0.0159	4.93e-09	336107	IVNT
	rs1412234	chr9:28410683	C	T	Body mass index	25673413	0.0234	4.92e-09	235182	IVNT
	rs1412234	chr9:28410683	C	T	Body mass index	25673413	0.0234	4.92e-09	235182	IVNT
	rs9273363	chr6:32626272	A	C	Body mass index males	28892062	-0.02866	4.81e-09	90992	IVNT
	rs1457489	chr18:57861961	A	G	Body mass index in physically inactive indivdiuals	28448500	0.0472	4.68e-09	46309	IVNT
	rs13107325	chr4:103188709	T	C	Body mass index	23754948	0.058	4.66e-09	126058	IVNT
	rs13107325	chr4:103188709	T	C	Body mass index	23754948	0.058	4.66e-09	126058	IVNT
	rs13107325	chr4:103188709	T	C	Body mass index	23754948	0.058	4.66e-09	126058	IVNT
	rs13107325	chr4:103188709	T	C	Body mass index	23754948	0.058	4.66e-09	126058	IVNT
	rs13107325	chr4:103188709	T	C	Body mass index	23754948	0.058	4.66e-09	126058	IVNT
	rs13107325	chr4:103188709	T	C	Body mass index	23754948	0.058	4.66e-09	126058	IVNT
	rs4818226	chr21:42633065	A	G	Body mass index	UKBB	-0.01517	4.54e-09	336107	IVNT
	rs4818226	chr21:42633065	A	G	Body mass index	UKBB	-0.01517	4.54e-09	336107	IVNT
	rs17309930	chr11:27748493	A	C	Body mass index adjusted for physical activity	28448500	0.0274	4.51e-09	180335	IVNT
	rs12641981	chr4:45179883	C	T	Body mass index in physically active males	28448500	-0.0364	4.31e-09	60924	IVNT
	rs12641981	chr4:45179883	C	T	Body mass index in physically active males	28448500	-0.0364	4.31e-09	60924	IVNT
	rs13303	chr3:52558008	C	T	Body mass index	28892062	0.02095	4.28e-09	173430	IVNT
	rs7141420	chr14:79899454	C	T	Body mass index in physically active indivdiuals	28448500	-0.0246	4.27e-09	135999	IVNT
	rs12577586	chr11:27600435	C	T	Body mass index adjusted for smoking	28443625	0.0221	4.22e-09	239801	IVNT
	rs1399627	chr2:227083411	G	A	Body mass index in males greater than 50 years of age	26426971	-0.03	4.2e-09	90111	IVNT
	rs13107325	chr4:103188709	T	C	Body mass index in physically active indivdiuals	28448500	0.0508	4.17e-09	142210	IVNT
	rs13107325	chr4:103188709	T	C	Body mass index in physically active indivdiuals	28448500	0.0508	4.17e-09	142210	IVNT
	rs13107325	chr4:103188709	T	C	Body mass index in physically active indivdiuals	28448500	0.0508	4.17e-09	142210	IVNT
	rs13107325	chr4:103188709	T	C	Body mass index in physically active indivdiuals	28448500	0.0508	4.17e-09	142210	IVNT
	rs13107325	chr4:103188709	T	C	Body mass index in physically active indivdiuals	28448500	0.0508	4.17e-09	142210	IVNT
	rs13107325	chr4:103188709	T	C	Body mass index in physically active indivdiuals	28448500	0.0508	4.17e-09	142210	IVNT
	rs1519480	chr11:27675712	C	T	Body mass index adjusted for smoking in females	28443625	0.0263	4.15e-09	137835	IVNT
	rs13107325	chr4:103188709	T	C	Body mass index adjusted for smoking in males	28443625	0.0607	4.05e-09	98978	IVNT
	rs13107325	chr4:103188709	T	C	Body mass index adjusted for smoking in males	28443625	0.0607	4.05e-09	98978	IVNT
	rs13107325	chr4:103188709	T	C	Body mass index adjusted for smoking in males	28443625	0.0607	4.05e-09	98978	IVNT
	rs13107325	chr4:103188709	T	C	Body mass index adjusted for smoking in males	28443625	0.0607	4.05e-09	98978	IVNT
	rs13107325	chr4:103188709	T	C	Body mass index adjusted for smoking in males	28443625	0.0607	4.05e-09	98978	IVNT
	rs13107325	chr4:103188709	T	C	Body mass index adjusted for smoking in males	28443625	0.0607	4.05e-09	98978	IVNT
	rs7132908	chr12:50263148	A	G	Body mass index 25 kgm2	23563607	NA	4.04e-09	16068	-
	rs7132908	chr12:50263148	A	G	Body mass index 25 kgm2	23563607	NA	4.04e-09	16068	-
	rs7141420	chr14:79899454	C	T	Body mass index in physically active individuals	28448500	-0.0246	4e-09	-	kg/m
	rs7613875	chr3:49971514	A	C	Body mass index	28892062	0.016	4e-09	-	kg/m
	rs2112347	chr5:75015242	G	T	Body mass index 35 kgm2	23563607	NA	3.95e-09	16068	-
	rs11257655	chr10:12307894	C	T	Body mass index males	28892062	0.02841	3.91e-09	90992	IVNT
	rs11257655	chr10:12307894	C	T	Body mass index males	28892062	0.02841	3.91e-09	90992	IVNT
	rs1425604	chr8:64796303	C	A	Body mass index	UKBB	0.01421	3.67e-09	336107	IVNT
	rs668799	chr17:40716235	T	C	Body mass index	UKBB	0.01579	3.67e-09	336107	IVNT
	rs2112347	chr5:75015242	G	T	Body mass index adjusted for physical activity	28448500	-0.0215	3.43e-09	199156	IVNT
	rs2838006	chr21:42653567	C	T	Body mass index	UKBB	0.01487	3.43e-09	336107	IVNT
	rs2943646	chr2:227099534	A	G	Body mass index in males greater than 50 years of age	26426971	0.03	3.3e-09	90732	IVNT
	rs2943646	chr2:227099534	A	G	Body mass index in males greater than 50 years of age	26426971	0.03	3.3e-09	90732	IVNT
	rs2943646	chr2:227099534	A	G	Body mass index in males greater than 50 years of age	26426971	0.03	3.3e-09	90732	IVNT
	rs2943646	chr2:227099534	A	G	Body mass index in males greater than 50 years of age	26426971	0.03	3.3e-09	90732	IVNT
	rs523288	chr18:57848369	T	A	Body mass index tails	23563607	0.19	3.3e-09	13016	log OR
	rs8101091	chr19:47600601	A	G	Body mass index adjusted for smoking	28443625	-0.0263	3.29e-09	169437	IVNT
	rs1915792	chr8:64703342	C	T	Body mass index	UKBB	0.01427	3.19e-09	336107	IVNT
	rs2112347	chr5:75015242	G	T	Body mass index adjusted for physical activity	28448500	-0.0229	3.11e-09	179478	IVNT
	rs10167485	chr2:181321102	A	G	Body mass index	UKBB	-0.01617	3.1e-09	336107	IVNT
	rs2303108	chr19:47589895	C	T	Body mass index	28448500	0.0246	3e-09	-	kg/m
	rs13107325	chr4:103188709	T	C	Body mass index	25673413	0.053	3e-09	-	kg/m2 increase
	rs13107325	chr4:103188709	T	C	Body mass index	25673413	0.053	3e-09	-	kg/m2 increase
	rs13107325	chr4:103188709	T	C	Body mass index	25673413	0.053	3e-09	-	kg/m2 increase
	rs13107325	chr4:103188709	T	C	Body mass index	25673413	0.053	3e-09	-	kg/m2 increase
	rs13107325	chr4:103188709	T	C	Body mass index	25673413	0.053	3e-09	-	kg/m2 increase
	rs13107325	chr4:103188709	T	C	Body mass index	25673413	0.053	3e-09	-	kg/m2 increase
	rs7903146	chr10:114758349	C	T	Body mass index	UKBB	0.01569	2.93e-09	336107	IVNT
	rs7903146	chr10:114758349	C	T	Body mass index	UKBB	0.01569	2.93e-09	336107	IVNT
	rs7903146	chr10:114758349	C	T	Body mass index	UKBB	0.01569	2.93e-09	336107	IVNT
	rs7903146	chr10:114758349	C	T	Body mass index	UKBB	0.01569	2.93e-09	336107	IVNT
	rs7903146	chr10:114758349	C	T	Body mass index	UKBB	0.01569	2.93e-09	336107	IVNT
	rs7132908	chr12:50263148	A	G	Body mass index in non-smokers	28443625	0.0277	2.93e-09	133419	IVNT
	rs7132908	chr12:50263148	A	G	Body mass index in non-smokers	28443625	0.0277	2.93e-09	133419	IVNT
	rs2943645	chr2:227099180	C	T	Body mass index in males greater than 50 years of age	26426971	0.03	2.9e-09	91667	IVNT
	rs13107325	chr4:103188709	T	C	Body mass index in males	25673413	0.0525	2.72e-09	152725	IVNT
	rs13107325	chr4:103188709	T	C	Body mass index in males	25673413	0.0525	2.72e-09	152725	IVNT
	rs13107325	chr4:103188709	T	C	Body mass index in males	25673413	0.0525	2.72e-09	152725	IVNT
	rs13107325	chr4:103188709	T	C	Body mass index in males	25673413	0.0525	2.72e-09	152725	IVNT
	rs13107325	chr4:103188709	T	C	Body mass index in males	25673413	0.0525	2.72e-09	152725	IVNT
	rs13107325	chr4:103188709	T	C	Body mass index in males	25673413	0.0525	2.72e-09	152725	IVNT
	rs2303108	chr19:47589895	C	T	Body mass index adjusted for physical activity	28448500	0.0246	2.67e-09	175598	IVNT
	rs13107325	chr4:103188709	T	C	Body mass index in males greater than 50 years of age	26426971	0.065	2.6e-09	90992	IVNT
	rs13107325	chr4:103188709	T	C	Body mass index in males greater than 50 years of age	26426971	0.065	2.6e-09	90992	IVNT
	rs13107325	chr4:103188709	T	C	Body mass index in males greater than 50 years of age	26426971	0.065	2.6e-09	90992	IVNT
	rs13107325	chr4:103188709	T	C	Body mass index in males greater than 50 years of age	26426971	0.065	2.6e-09	90992	IVNT
	rs13107325	chr4:103188709	T	C	Body mass index in males greater than 50 years of age	26426971	0.065	2.6e-09	90992	IVNT
	rs13107325	chr4:103188709	T	C	Body mass index in males greater than 50 years of age	26426971	0.065	2.6e-09	90992	IVNT
	rs7132908	chr12:50263148	A	G	Body mass index	23754948	0.03733	2.52e-09	69950	IVNT
	rs7132908	chr12:50263148	A	G	Body mass index	23754948	0.03733	2.52e-09	69950	IVNT
	rs2613505	chr1:72835410	T	C	Body mass index in males less than or equal to 50 years of age	26426971	0.053	2.5e-09	49764	IVNT
	rs6545714	chr2:59307725	A	G	Body mass index	25673413	-0.0177	2.48e-09	339167	IVNT
	rs7132908	chr12:50263148	A	G	Body mass index in females	25673413	0.0328	2.47e-09	105985	IVNT
	rs7132908	chr12:50263148	A	G	Body mass index in females	25673413	0.0328	2.47e-09	105985	IVNT
	rs12790913	chr11:27511998	A	G	Body mass index adjusted for smoking	28443625	0.0222	2.25e-09	239453	IVNT
	rs216218	chr17:2145329	A	G	Body mass index	UKBB	0.01503	2.2e-09	336107	IVNT
	rs1457231	chr2:161101562	T	C	Body mass index	UKBB	0.01546	2.16e-09	336107	IVNT
	rs1519480	chr11:27675712	C	T	Body mass index	20935630	NA	2.12e-09	123864	IVNT
	rs1519480	chr11:27675712	C	T	Body mass index	20935630	NA	2.12e-09	123865	-
	rs3742305	chr13:31036642	G	C	Body mass index	UKBB	-0.01624	2.11e-09	336107	IVNT
	rs7923837	chr10:94481917	A	G	Body mass index	28892062	0.015	2e-09	-	kg/m
	rs13107325	chr4:103188709	T	C	Body mass index joint analysis main effects and physical activity interaction	28448500	NA	2e-09	-	-
	rs13107325	chr4:103188709	T	C	Body mass index joint analysis main effects and physical activity interaction	28448500	NA	2e-09	-	-
	rs13107325	chr4:103188709	T	C	Body mass index joint analysis main effects and physical activity interaction	28448500	NA	2e-09	-	-
	rs13107325	chr4:103188709	T	C	Body mass index joint analysis main effects and physical activity interaction	28448500	NA	2e-09	-	-
	rs13107325	chr4:103188709	T	C	Body mass index joint analysis main effects and physical activity interaction	28448500	NA	2e-09	-	-
	rs13107325	chr4:103188709	T	C	Body mass index joint analysis main effects and physical activity interaction	28448500	NA	2e-09	-	-
	rs12577586	chr11:27600435	C	T	Body mass index in males	25673413	0.0288	1.97e-09	152867	IVNT
	rs17066842	chr18:58040624	A	G	Body mass index adjusted for smoking	28443625	-0.059	1.93e-09	166114	IVNT
	rs3184504	chr12:111884608	C	T	Body mass index	29273807	0.014	1.9e-09	449889	IVNT
	rs3184504	chr12:111884608	C	T	Body mass index	29273807	0.014	1.9e-09	449889	IVNT
	rs3184504	chr12:111884608	C	T	Body mass index	29273807	0.014	1.9e-09	449889	IVNT
	rs9537803	chr13:58366634	C	T	Body mass index	UKBB	0.0161	1.87e-09	336107	IVNT
	rs72663503	chr1:39969059	C	T	Body mass index	UKBB	-0.01722	1.84e-09	336107	IVNT
	rs2307111	chr5:75003678	T	C	Body mass index adjusted for physical activity	28448500	0.0219	1.72e-09	195064	IVNT
	rs2307111	chr5:75003678	T	C	Body mass index adjusted for physical activity	28448500	0.0219	1.72e-09	195064	IVNT
	rs2307111	chr5:75003678	T	C	Body mass index adjusted for physical activity	28448500	0.0219	1.72e-09	195064	IVNT
	rs17066842	chr18:58040624	A	G	Body mass index in females	25673413	-0.0642	1.7e-09	156638	IVNT
	rs1519480	chr11:27675712	C	T	Body mass index adjsuted for physical activity in males	28448500	0.033	1.7e-09	84486	IVNT
	rs11257655	chr10:12307894	C	T	Body mass index	28892062	0.02142	1.69e-09	173430	IVNT
	rs11257655	chr10:12307894	C	T	Body mass index	28892062	0.02142	1.69e-09	173430	IVNT
	rs2531995	chr16:4013467	T	C	Body mass index	25673413	0.0241	1.69e-09	233987	IVNT
	rs2229616	chr18:58039276	T	C	Body mass index adjusted for smoking in females	28443625	-0.1072	1.66e-09	103464	IVNT
	rs3184504	chr12:111884608	C	T	Body mass index	29273807	0.013	1.6e-09	526508	IVNT
	rs3184504	chr12:111884608	C	T	Body mass index	29273807	0.013	1.6e-09	526508	IVNT
	rs3184504	chr12:111884608	C	T	Body mass index	29273807	0.013	1.6e-09	526508	IVNT
	rs9273526	chr6:32628617	A	C	Body mass index males	28892062	0.03416	1.59e-09	90992	IVNT
	rs9273526	chr6:32628617	A	C	Body mass index males	28892062	0.03416	1.59e-09	90992	IVNT
	rs1457489	chr18:57861961	A	G	Body mass index in physically inactive indivdiuals	28448500	0.0522	1.51e-09	41984	IVNT
	rs11861132	chr16:28871860	A	G	Body mass index	28892062	-0.0305	1.47e-09	173430	IVNT
	rs13107325	chr4:103188709	T	C	Body mass index in physically active indivdiuals	28448500	0.0531	1.46e-09	132755	IVNT
	rs13107325	chr4:103188709	T	C	Body mass index in physically active indivdiuals	28448500	0.0531	1.46e-09	132755	IVNT
	rs13107325	chr4:103188709	T	C	Body mass index in physically active indivdiuals	28448500	0.0531	1.46e-09	132755	IVNT
	rs13107325	chr4:103188709	T	C	Body mass index in physically active indivdiuals	28448500	0.0531	1.46e-09	132755	IVNT
	rs13107325	chr4:103188709	T	C	Body mass index in physically active indivdiuals	28448500	0.0531	1.46e-09	132755	IVNT
	rs13107325	chr4:103188709	T	C	Body mass index in physically active indivdiuals	28448500	0.0531	1.46e-09	132755	IVNT
	rs7766070	chr6:20686573	A	C	Body mass index	22344219	NA	1.42e-09	27715	-
	rs6931514	chr6:20703952	A	G	Body mass index females	28892062	0.0319	1.41e-09	82438	IVNT
	rs1412234	chr9:28410683	C	T	Body mass index in physically active indivdiuals	28448500	0.0299	1.4e-09	116973	IVNT
	rs1412234	chr9:28410683	C	T	Body mass index in physically active indivdiuals	28448500	0.0299	1.4e-09	116973	IVNT
	rs2943652	chr2:227108446	C	T	Body mass index in males greater than 50 years of age	26426971	0.031	1.4e-09	90042	IVNT
	rs6142068	chr20:32557172	C	T	Body mass index	UKBB	0.01482	1.39e-09	336107	IVNT
	rs1412234	chr9:28410683	C	T	Body mass index adjusted for physical activity	28448500	0.027	1.35e-09	154689	IVNT
	rs1412234	chr9:28410683	C	T	Body mass index adjusted for physical activity	28448500	0.027	1.35e-09	154689	IVNT
	rs1519480	chr11:27675712	C	T	Body mass index in physically active indivdiuals	28448500	0.027	1.31e-09	138203	IVNT
	rs10513801	chr3:185822353	G	T	Body mass index in non-smokers	28443625	-0.0346	1.29e-09	180528	IVNT
	rs10838782	chr11:47877800	A	G	Body mass index adjusted for physical activity	28448500	0.0227	1.29e-09	180382	IVNT
	rs12577586	chr11:27600435	C	T	Body mass index in females	25673413	0.0281	1.28e-09	171955	IVNT
	rs13107325	chr4:103188709	T	C	Body mass index adjsuted for physical activity in males	28448500	0.0698	1.28e-09	79783	IVNT
	rs13107325	chr4:103188709	T	C	Body mass index adjsuted for physical activity in males	28448500	0.0698	1.28e-09	79783	IVNT
	rs13107325	chr4:103188709	T	C	Body mass index adjsuted for physical activity in males	28448500	0.0698	1.28e-09	79783	IVNT
	rs13107325	chr4:103188709	T	C	Body mass index adjsuted for physical activity in males	28448500	0.0698	1.28e-09	79783	IVNT
	rs13107325	chr4:103188709	T	C	Body mass index adjsuted for physical activity in males	28448500	0.0698	1.28e-09	79783	IVNT
	rs13107325	chr4:103188709	T	C	Body mass index adjsuted for physical activity in males	28448500	0.0698	1.28e-09	79783	IVNT
	rs28433586	chr5:75146775	A	G	Body mass index	UKBB	0.02438	1.22e-09	336107	IVNT
	rs12641981	chr4:45179883	C	T	Body mass index in males less than or equal to 50 years of age	26426971	-0.042	1.2e-09	49200	IVNT
	rs12641981	chr4:45179883	C	T	Body mass index in males less than or equal to 50 years of age	26426971	-0.042	1.2e-09	49200	IVNT
	rs7132908	chr12:50263148	A	G	Body mass index in females greater than 50 years of age	26426971	0.034	1.2e-09	80527	IVNT
	rs7132908	chr12:50263148	A	G	Body mass index in females greater than 50 years of age	26426971	0.034	1.2e-09	80527	IVNT
	rs1549293	chr16:31141993	T	C	Body mass index	25673413	-0.019	1.14e-09	322060	IVNT
	rs6499240	chr16:69686912	A	G	Body mass index in non-smokers	28443625	-0.0288	1.11e-09	116339	IVNT
	rs6499240	chr16:69686912	A	G	Body mass index in non-smokers	28443625	-0.0288	1.11e-09	116339	IVNT
	rs2836961	chr21:40627020	A	C	Body mass index	UKBB	-0.01512	1.08e-09	336107	IVNT
	rs2229616	chr18:58039276	T	C	Body mass index adjusted for smoking	28443625	-0.085	1e-09	164050	IVNT
	rs10513801	chr3:185822353	G	T	Body mass index in females greater than 50 years of age	26426971	-0.043	1e-09	102221	IVNT
	rs2968856	chr7:150614934	T	C	Body mass index	UKBB	0.01698	1e-09	336107	IVNT
	rs12790913	chr11:27511998	A	G	Body mass index in females	25673413	0.0284	1e-09	171020	IVNT
	rs2303108	chr19:47589895	C	T	Body mass index joint analysis main effects and physical activity interaction	28448500	NA	1e-09	-	-
	rs1412234	chr9:28410683	C	T	Body mass index in physically active indivdiuals	28448500	0.0308	9.95e-10	110058	IVNT
	rs1412234	chr9:28410683	C	T	Body mass index in physically active indivdiuals	28448500	0.0308	9.95e-10	110058	IVNT
	rs2307111	chr5:75003678	T	C	Body mass index in non-smokers	28443625	0.0239	9.81e-10	167971	IVNT
	rs2307111	chr5:75003678	T	C	Body mass index in non-smokers	28443625	0.0239	9.81e-10	167971	IVNT
	rs2307111	chr5:75003678	T	C	Body mass index in non-smokers	28443625	0.0239	9.81e-10	167971	IVNT
	rs62512210	chr8:116623548	C	T	Body mass index	UKBB	-0.02653	9.6e-10	336107	IVNT
	rs559623	chr18:57843875	C	A	Body mass index in males	23754948	0.039	9.39e-10	58617	IVNT
	rs181206	chr16:28513403	G	A	Body mass index	28892062	0.0334	9.3e-10	173430	IVNT
	rs2531995	chr16:4013467	T	C	Body mass index	28892062	0.02308	9.13e-10	173430	IVNT
	rs2531995	chr16:4013467	T	C	Body mass index in physically active indivdiuals	28448500	0.0297	8.89e-10	114898	IVNT
	rs12790913	chr11:27511998	A	G	Body mass index in non-smokers	28443625	0.0284	8.59e-10	163658	IVNT
	rs998584	chr6:43757896	C	A	Body mass index	29273807	0.014	7.9e-10	526508	IVNT
	rs998584	chr6:43757896	C	A	Body mass index	29273807	0.014	7.9e-10	526508	IVNT
	rs998584	chr6:43757896	C	A	Body mass index	29273807	0.014	7.9e-10	526508	IVNT
	rs998584	chr6:43757896	C	A	Body mass index	29273807	0.014	7.9e-10	526508	IVNT
	rs998584	chr6:43757896	C	A	Body mass index	29273807	0.014	7.9e-10	526508	IVNT
	rs998584	chr6:43757896	C	A	Body mass index	29273807	0.014	7.9e-10	526508	IVNT
	rs998584	chr6:43757896	C	A	Body mass index	29273807	0.014	7.9e-10	526508	IVNT
	rs998584	chr6:43757896	C	A	Body mass index	29273807	0.014	7.9e-10	526508	IVNT
	rs1412234	chr9:28410683	C	T	Body mass index adjusted for smoking	28443625	0.0258	7.85e-10	163612	IVNT
	rs1412234	chr9:28410683	C	T	Body mass index adjusted for smoking	28443625	0.0258	7.85e-10	163612	IVNT
	rs2531995	chr16:4013467	T	C	Body mass index in physically active indivdiuals	28448500	0.0306	7.84e-10	109426	IVNT
	rs2613505	chr1:72835410	T	C	Body mass index adjusted for physical activity	28448500	0.029	7.63e-10	199241	IVNT
	rs2531995	chr16:4013467	T	C	Body mass index	25673413	0.024	7.56e-10	236149	IVNT
	rs7604277	chr2:58823770	C	T	Body mass index	UKBB	-0.01555	7.22e-10	336107	IVNT
	rs1516725	chr3:185824004	C	T	Body mass index in non-smokers	28443625	0.0325	7.18e-10	189443	IVNT
	rs1516725	chr3:185824004	C	T	Body mass index in non-smokers	28443625	0.0325	7.18e-10	189443	IVNT
	rs1516725	chr3:185824004	C	T	BMI in non smokers	28443625	-0.0325	7e-10	-	kg/m
	rs1516725	chr3:185824004	C	T	BMI in non smokers	28443625	-0.0325	7e-10	-	kg/m
	rs7903146	chr10:114758349	C	T	BMI in non smokers	28443625	-0.0264	7e-10	-	kg/m
	rs7903146	chr10:114758349	C	T	BMI in non smokers	28443625	-0.0264	7e-10	-	kg/m
	rs7903146	chr10:114758349	C	T	BMI in non smokers	28443625	-0.0264	7e-10	-	kg/m
	rs7903146	chr10:114758349	C	T	BMI in non smokers	28443625	-0.0264	7e-10	-	kg/m
	rs7903146	chr10:114758349	C	T	BMI in non smokers	28443625	-0.0264	7e-10	-	kg/m
	rs7903146	chr10:114758349	C	T	Body mass index in non-smokers	28443625	0.0264	6.54e-10	168264	IVNT
	rs7903146	chr10:114758349	C	T	Body mass index in non-smokers	28443625	0.0264	6.54e-10	168264	IVNT
	rs7903146	chr10:114758349	C	T	Body mass index in non-smokers	28443625	0.0264	6.54e-10	168264	IVNT
	rs7903146	chr10:114758349	C	T	Body mass index in non-smokers	28443625	0.0264	6.54e-10	168264	IVNT
	rs7903146	chr10:114758349	C	T	Body mass index in non-smokers	28443625	0.0264	6.54e-10	168264	IVNT
	rs7451008	chr6:20673880	C	T	Body mass index females	28892062	-0.03303	6.48e-10	82438	IVNT
	rs7141420	chr14:79899454	C	T	Body mass index in non-smokers	28443625	-0.0242	6.46e-10	161556	IVNT
	rs1412234	chr9:28410683	C	T	Body mass index adjusted for physical activity	28448500	0.0286	6.19e-10	141233	IVNT
	rs1412234	chr9:28410683	C	T	Body mass index adjusted for physical activity	28448500	0.0286	6.19e-10	141233	IVNT
	rs7132908	chr12:50263148	A	G	Body mass index adjusted for physical activity	28448500	0.0299	6.02e-10	118438	IVNT
	rs7132908	chr12:50263148	A	G	Body mass index adjusted for physical activity	28448500	0.0299	6.02e-10	118438	IVNT
	rs7141420	chr14:79899454	C	T	Body mass index	28448500	-0.0297	6e-10	-	kg/m
	rs559623	chr18:57843875	C	A	Body mass index in females	25673413	0.0291	5.96e-10	132067	IVNT
	rs9401593	chr6:98549801	A	C	Body mass index	UKBB	0.01494	5.9e-10	336107	IVNT
	rs11030107	chr11:27694835	A	G	Body mass index in males	25673413	-0.0288	5.88e-10	152690	IVNT
	rs7903146	chr10:114758349	C	T	Body mass index adjusted for physical activity	28448500	0.0243	5.09e-10	196840	IVNT
	rs7903146	chr10:114758349	C	T	Body mass index adjusted for physical activity	28448500	0.0243	5.09e-10	196840	IVNT
	rs7903146	chr10:114758349	C	T	Body mass index adjusted for physical activity	28448500	0.0243	5.09e-10	196840	IVNT
	rs7903146	chr10:114758349	C	T	Body mass index adjusted for physical activity	28448500	0.0243	5.09e-10	196840	IVNT
	rs7903146	chr10:114758349	C	T	Body mass index adjusted for physical activity	28448500	0.0243	5.09e-10	196840	IVNT
	rs3802177	chr8:118185025	G	A	Body mass index	28892062	0.021	5e-10	-	kg/m
	rs13107325	chr4:103188709	T	C	Body mass index	28448500	0.0741	5e-10	-	kg/m
	rs13107325	chr4:103188709	T	C	Body mass index	28448500	0.0741	5e-10	-	kg/m
	rs13107325	chr4:103188709	T	C	Body mass index	28448500	0.0741	5e-10	-	kg/m
	rs13107325	chr4:103188709	T	C	Body mass index	28448500	0.0741	5e-10	-	kg/m
	rs13107325	chr4:103188709	T	C	Body mass index	28448500	0.0741	5e-10	-	kg/m
	rs13107325	chr4:103188709	T	C	Body mass index	28448500	0.0741	5e-10	-	kg/m
	rs4808766	chr19:18335715	C	G	Body mass index	UKBB	0.01688	4.55e-10	336107	IVNT
	rs1412234	chr9:28410683	C	T	Body mass index adjusted for smoking	28443625	0.0249	4.54e-10	185626	IVNT
	rs1412234	chr9:28410683	C	T	Body mass index adjusted for smoking	28443625	0.0249	4.54e-10	185626	IVNT
	rs12577586	chr11:27600435	C	T	Body mass index in non-smokers	28443625	0.0289	4.49e-10	163756	IVNT
	rs10838782	chr11:47877800	A	G	Body mass index adjusted for physical activity	28448500	0.0222	4.48e-10	200407	IVNT
	rs1177562	chr11:118949331	T	C	Body mass index	UKBB	0.01526	4.22e-10	336107	IVNT
	rs8057044	chr16:53812614	A	G	Body mass index	21935397	NA	4.2e-10	5373	-
	rs7924036	chr10:65191645	G	T	Body mass index	UKBB	0.01502	4.16e-10	336107	IVNT
	rs7924036	chr10:65191645	G	T	Body mass index	UKBB	0.01502	4.16e-10	336107	IVNT
	rs11619722	chr13:27998600	C	T	Body mass index	UKBB	-0.01639	3.88e-10	336107	IVNT
	rs2613505	chr1:72835410	T	C	Body mass index in non-smokers	28443625	0.0319	3.83e-10	163672	IVNT
	rs11871606	chr17:45732774	A	C	Body mass index	29273807	0.013	3.8e-10	526508	IVNT
	rs2229616	chr18:58039276	T	C	Body mass index in physically active indivdiuals	28448500	-0.0954	3.76e-10	139013	IVNT
	rs17309930	chr11:27748493	A	C	Body mass index in non-smokers	28443625	0.0314	3.72e-10	157852	IVNT
	rs2303108	chr19:47589895	C	T	Body mass index adjusted for smoking in females	28443625	0.0312	3.54e-10	110567	IVNT
	rs2229616	chr18:58039276	T	C	Body mass index in non-smokers	28443625	-0.0937	3.52e-10	150013	IVNT
	rs7141420	chr14:79899454	C	T	Body mass index in physically active indivdiuals	28448500	-0.025	3.5e-10	147975	IVNT
	rs2613505	chr1:72835410	T	C	Body mass index in males	23754948	0.053	3.42e-10	58616	IVNT
	rs1121980	chr16:53809247	G	A	Body mass index	29273807	-0.053	3.4e-10	29398	IVNT
	rs968050	chr6:98574560	T	C	Body mass index	UKBB	-0.01512	3.36e-10	336107	IVNT
	rs2072412	chr7:150647970	G	C	Body mass index	UKBB	-0.01705	3.35e-10	336107	IVNT
	rs12140153	chr1:62579891	T	G	Body mass index	29273807	-0.03	3.3e-10	526508	IVNT
	rs12140153	chr1:62579891	T	G	Body mass index	29273807	-0.03	3.3e-10	526508	IVNT
	rs12140153	chr1:62579891	T	G	Body mass index	29273807	-0.03	3.3e-10	526508	IVNT
	rs12140153	chr1:62579891	T	G	Body mass index	29273807	-0.03	3.3e-10	526508	IVNT
	rs12140153	chr1:62579891	T	G	Body mass index	29273807	-0.03	3.3e-10	526508	IVNT
	rs13107325	chr4:103188709	T	C	Body mass index adjusted for smoking	28443625	0.0469	3.17e-10	207588	IVNT
	rs13107325	chr4:103188709	T	C	Body mass index adjusted for smoking	28443625	0.0469	3.17e-10	207588	IVNT
	rs13107325	chr4:103188709	T	C	Body mass index adjusted for smoking	28443625	0.0469	3.17e-10	207588	IVNT
	rs13107325	chr4:103188709	T	C	Body mass index adjusted for smoking	28443625	0.0469	3.17e-10	207588	IVNT
	rs13107325	chr4:103188709	T	C	Body mass index adjusted for smoking	28443625	0.0469	3.17e-10	207588	IVNT
	rs13107325	chr4:103188709	T	C	Body mass index adjusted for smoking	28443625	0.0469	3.17e-10	207588	IVNT
	rs13107325	chr4:103188709	T	C	Body mass index adjusted for physical activity	28448500	0.0488	3.1e-10	190113	IVNT
	rs13107325	chr4:103188709	T	C	Body mass index adjusted for physical activity	28448500	0.0488	3.1e-10	190113	IVNT
	rs13107325	chr4:103188709	T	C	Body mass index adjusted for physical activity	28448500	0.0488	3.1e-10	190113	IVNT
	rs13107325	chr4:103188709	T	C	Body mass index adjusted for physical activity	28448500	0.0488	3.1e-10	190113	IVNT
	rs13107325	chr4:103188709	T	C	Body mass index adjusted for physical activity	28448500	0.0488	3.1e-10	190113	IVNT
	rs13107325	chr4:103188709	T	C	Body mass index adjusted for physical activity	28448500	0.0488	3.1e-10	190113	IVNT
	rs13107325	chr4:103188709	T	C	BMI adjusted for smoking behaviour	28443625	0.0469	3e-10	-	kg/m
	rs13107325	chr4:103188709	T	C	BMI adjusted for smoking behaviour	28443625	0.0469	3e-10	-	kg/m
	rs13107325	chr4:103188709	T	C	BMI adjusted for smoking behaviour	28443625	0.0469	3e-10	-	kg/m
	rs13107325	chr4:103188709	T	C	BMI adjusted for smoking behaviour	28443625	0.0469	3e-10	-	kg/m
	rs13107325	chr4:103188709	T	C	BMI adjusted for smoking behaviour	28443625	0.0469	3e-10	-	kg/m
	rs13107325	chr4:103188709	T	C	BMI adjusted for smoking behaviour	28443625	0.0469	3e-10	-	kg/m
	rs7141420	chr14:79899454	C	T	Body mass index joint analysis main effects and physical activity interaction	28448500	NA	3e-10	-	-
	rs2223621	chr6:20621238	T	C	Body mass index males	28892062	-0.03334	2.89e-10	90992	IVNT
	rs10838782	chr11:47877800	A	G	Body mass index	20935630	NA	2.81e-10	123824	IVNT
	rs10838782	chr11:47877800	A	G	Body mass index	20935630	NA	2.81e-10	123865	-
	rs7190771	chr16:28590030	G	A	Body mass index	28892062	-0.03379	2.79e-10	173430	IVNT
	rs12972156	chr19:45387459	C	G	Body mass index	UKBB	0.02143	2.78e-10	336107	IVNT
	rs12972156	chr19:45387459	C	G	Body mass index	UKBB	0.02143	2.78e-10	336107	IVNT
	rs11554159	chr19:18285944	A	G	Body mass index	29273807	0.015	2.7e-10	526508	IVNT
	rs13389219	chr2:165528876	C	T	Body mass index	29273807	-0.014	2.6e-10	526508	IVNT
	rs13389219	chr2:165528876	C	T	Body mass index	29273807	-0.014	2.6e-10	526508	IVNT
	rs13389219	chr2:165528876	C	T	Body mass index	29273807	-0.014	2.6e-10	526508	IVNT
	rs13389219	chr2:165528876	C	T	Body mass index	29273807	-0.014	2.6e-10	526508	IVNT
	rs13389219	chr2:165528876	C	T	Body mass index	29273807	-0.014	2.6e-10	526508	IVNT
	rs13389219	chr2:165528876	C	T	Body mass index	29273807	-0.014	2.6e-10	526508	IVNT
	rs12790913	chr11:27511998	A	G	Body mass index adjusted for smoking	28443625	0.0255	2.51e-10	209134	IVNT
	rs12641981	chr4:45179883	C	T	Body mass index in females greater than 50 years of age	26426971	-0.031	2.5e-10	104023	IVNT
	rs12641981	chr4:45179883	C	T	Body mass index in females greater than 50 years of age	26426971	-0.031	2.5e-10	104023	IVNT
	rs6489156	chr12:123100397	C	T	Body mass index	UKBB	-0.01716	2.48e-10	336107	IVNT
	rs34872471	chr10:114754071	C	T	Body mass index males	28892062	-0.07354	2.38e-10	90992	IVNT
	rs10513801	chr3:185822353	G	T	Body mass index in non-smokers	28443625	-0.0378	2.34e-10	154882	IVNT
	rs7141420	chr14:79899454	C	T	Body mass index in physically active females	28448500	-0.0315	2.23e-10	87514	IVNT
	rs9908648	chr17:21255409	A	G	Body mass index	UKBB	0.01657	2.18e-10	336107	IVNT
	rs12140153	chr1:62579891	T	G	Body mass index	29273807	-0.032	2.1e-10	449889	IVNT
	rs12140153	chr1:62579891	T	G	Body mass index	29273807	-0.032	2.1e-10	449889	IVNT
	rs12140153	chr1:62579891	T	G	Body mass index	29273807	-0.032	2.1e-10	449889	IVNT
	rs12140153	chr1:62579891	T	G	Body mass index	29273807	-0.032	2.1e-10	449889	IVNT
	rs12140153	chr1:62579891	T	G	Body mass index	29273807	-0.032	2.1e-10	449889	IVNT
	rs4841638	chr8:11796023	C	T	Body mass index	UKBB	0.01539	2.08e-10	336107	IVNT
	rs13107325	chr4:103188709	T	C	Body mass index adjusted for physical activity	28448500	0.0505	2e-10	173078	IVNT
	rs13107325	chr4:103188709	T	C	Body mass index adjusted for physical activity	28448500	0.0505	2e-10	173078	IVNT
	rs13107325	chr4:103188709	T	C	Body mass index adjusted for physical activity	28448500	0.0505	2e-10	173078	IVNT
	rs13107325	chr4:103188709	T	C	Body mass index adjusted for physical activity	28448500	0.0505	2e-10	173078	IVNT
	rs13107325	chr4:103188709	T	C	Body mass index adjusted for physical activity	28448500	0.0505	2e-10	173078	IVNT
	rs13107325	chr4:103188709	T	C	Body mass index adjusted for physical activity	28448500	0.0505	2e-10	173078	IVNT
	rs13107325	chr4:103188709	T	C	Body mass index joint analysis main effects and smoking interaction	28443625	NA	2e-10	-	-
	rs13107325	chr4:103188709	T	C	Body mass index joint analysis main effects and smoking interaction	28443625	NA	2e-10	-	-
	rs13107325	chr4:103188709	T	C	Body mass index joint analysis main effects and smoking interaction	28443625	NA	2e-10	-	-
	rs13107325	chr4:103188709	T	C	Body mass index joint analysis main effects and smoking interaction	28443625	NA	2e-10	-	-
	rs13107325	chr4:103188709	T	C	Body mass index joint analysis main effects and smoking interaction	28443625	NA	2e-10	-	-
	rs13107325	chr4:103188709	T	C	Body mass index joint analysis main effects and smoking interaction	28443625	NA	2e-10	-	-
	rs12577586	chr11:27600435	C	T	Body mass index adjusted for smoking	28443625	0.0258	1.87e-10	209425	IVNT
	rs2613505	chr1:72835410	T	C	Body mass index	20935630	NA	1.8e-10	123861	IVNT
	rs2613505	chr1:72835410	T	C	Body mass index	20935630	NA	1.8e-10	123865	-
	rs2307111	chr5:75003678	T	C	Body mass index adjusted for smoking	28443625	0.0222	1.79e-10	216688	IVNT
	rs2307111	chr5:75003678	T	C	Body mass index adjusted for smoking	28443625	0.0222	1.79e-10	216688	IVNT
	rs2307111	chr5:75003678	T	C	Body mass index adjusted for smoking	28443625	0.0222	1.79e-10	216688	IVNT
	rs4710938	chr6:20640904	A	G	Body mass index females	28892062	-0.03464	1.72e-10	82438	IVNT
	rs4710938	chr6:20640904	A	G	Body mass index females	28892062	-0.03464	1.72e-10	82438	IVNT
	rs11554159	chr19:18285944	A	G	Body mass index	29273807	0.016	1.7e-10	449889	IVNT
	rs2229616	chr18:58039276	T	C	Body mass index ajusted for physical activity in females	28448500	-0.1082	1.67e-10	112039	IVNT
	rs2968854	chr7:150637834	C	T	Body mass index	UKBB	0.01778	1.62e-10	336107	IVNT
	rs1516725	chr3:185824004	C	T	Body mass index in females greater than 50 years of age	26426971	0.045	1.6e-10	103920	IVNT
	rs1516725	chr3:185824004	C	T	Body mass index in females greater than 50 years of age	26426971	0.045	1.6e-10	103920	IVNT
	rs7903146	chr10:114758349	C	T	Body mass index males	28892062	0.07434	1.53e-10	90992	IVNT
	rs7903146	chr10:114758349	C	T	Body mass index males	28892062	0.07434	1.53e-10	90992	IVNT
	rs7903146	chr10:114758349	C	T	Body mass index males	28892062	0.07434	1.53e-10	90992	IVNT
	rs7903146	chr10:114758349	C	T	Body mass index males	28892062	0.07434	1.53e-10	90992	IVNT
	rs7903146	chr10:114758349	C	T	Body mass index males	28892062	0.07434	1.53e-10	90992	IVNT
	rs10513801	chr3:185822353	G	T	Body mass index in physically active females	28448500	-0.0485	1.52e-10	88336	IVNT
	rs2721961	chr8:116657911	G	T	Body mass index	UKBB	-0.01711	1.48e-10	336107	IVNT
	rs3825061	chr11:118944675	C	T	Body mass index	UKBB	-0.01574	1.46e-10	336107	IVNT
	rs3825061	chr11:118944675	C	T	Body mass index	UKBB	-0.01574	1.46e-10	336107	IVNT
	rs17309930	chr11:27748493	A	C	Body mass index in non-smokers	28443625	0.0305	1.37e-10	183682	IVNT
	rs7141420	chr14:79899454	C	T	Body mass index adjusted for physical activity	28448500	-0.0241	1.34e-10	176789	IVNT
	rs12790913	chr11:27511998	A	G	Body mass index in males	25673413	0.0311	1.34e-10	151766	IVNT
	rs1549293	chr16:31141993	T	C	Body mass index	25673413	-0.0196	1.27e-10	339125	IVNT
	rs1928496	chr13:31012904	T	C	Body mass index	UKBB	0.01766	1.22e-10	336107	IVNT
	rs559623	chr18:57843875	C	A	Body mass index in physically active males	28448500	0.0445	1.21e-10	46383	IVNT
	rs2613505	chr1:72835410	T	C	Body mass index in females	25673413	0.0331	1.2e-10	171870	IVNT
	rs1457489	chr18:57861961	A	G	Body mass index tails	23563607	0.2	1.2e-10	13734	log OR
	rs11665439	chr18:57889651	A	G	Body mass index males	28892062	-0.04531	1.19e-10	90992	IVNT
	rs1457489	chr18:57861961	A	G	Body mass index in males	23754948	0.047	1e-10	58617	IVNT
	rs9647335	chr3:135880410	A	T	Body mass index	UKBB	0.01982	9.47e-11	336107	IVNT
	rs1516725	chr3:185824004	C	T	Body mass index in non-smokers	28443625	0.0378	9.22e-11	163634	IVNT
	rs1516725	chr3:185824004	C	T	Body mass index in non-smokers	28443625	0.0378	9.22e-11	163634	IVNT
	rs13107325	chr4:103188709	T	C	Body mass index adjusted for smoking	28443625	0.0497	8.98e-11	181290	IVNT
	rs13107325	chr4:103188709	T	C	Body mass index adjusted for smoking	28443625	0.0497	8.98e-11	181290	IVNT
	rs13107325	chr4:103188709	T	C	Body mass index adjusted for smoking	28443625	0.0497	8.98e-11	181290	IVNT
	rs13107325	chr4:103188709	T	C	Body mass index adjusted for smoking	28443625	0.0497	8.98e-11	181290	IVNT
	rs13107325	chr4:103188709	T	C	Body mass index adjusted for smoking	28443625	0.0497	8.98e-11	181290	IVNT
	rs13107325	chr4:103188709	T	C	Body mass index adjusted for smoking	28443625	0.0497	8.98e-11	181290	IVNT
	rs2303108	chr19:47589895	C	T	Body mass index in females	25673413	0.0278	8.53e-11	171952	IVNT
	rs9379829	chr6:26172219	C	T	Body mass index	UKBB	0.01895	7.26e-11	336107	IVNT
	rs11656743	chr17:65980289	A	G	Body mass index	UKBB	-0.01943	7.22e-11	336107	IVNT
	rs7036107	chr9:92177897	A	G	Body mass index	UKBB	-0.01598	6.6e-11	336107	IVNT
	rs11030107	chr11:27694835	A	G	Body mass index adjusted for physical activity	28448500	-0.028	6.24e-11	179175	IVNT
	rs2737245	chr8:116658583	G	T	Body mass index	UKBB	0.01749	6.13e-11	336107	IVNT
	rs6857	chr19:45392254	T	C	Body mass index in females greater than 50 years of age	26426971	-0.049	6.1e-11	88133	IVNT
	rs11030107	chr11:27694835	A	G	Body mass index adjusted for physical activity	28448500	-0.027	6.04e-11	199204	IVNT
	rs8057044	chr16:53812614	A	G	Body mass index in physically inactive males	28448500	0.0662	5.82e-11	21942	IVNT
	rs8050136	chr16:53816275	A	C	Body mass index	19056611	NA	5.8e-11	4862	-
	rs34872471	chr10:114754071	C	T	Body mass index	28892062	-0.05634	5.71e-11	173430	IVNT
	rs17066842	chr18:58040624	A	G	Body mass index adjusted for physical activity	28448500	-0.0593	5.47e-11	184606	IVNT
	rs1519480	chr11:27675712	C	T	Body mass index	23754948	0.03106	5.45e-11	126575	IVNT
	rs1519480	chr11:27675712	C	T	Body mass index adjusted for smoking in males	28443625	0.0328	5.29e-11	102731	IVNT
	rs523288	chr18:57848369	T	A	Body mass index in smokers	28443625	0.0514	5.24e-11	50314	IVNT
	rs4710938	chr6:20640904	A	G	Body mass index males	28892062	-0.03271	5.07e-11	90992	IVNT
	rs4710938	chr6:20640904	A	G	Body mass index males	28892062	-0.03271	5.07e-11	90992	IVNT
	rs1519480	chr11:27675712	C	T	Body mass index in physically active indivdiuals	28448500	0.0279	5.07e-11	150190	IVNT
	rs7132908	chr12:50263148	A	G	Body mass index adjusted for smoking	28443625	0.0283	5.07e-11	147521	IVNT
	rs7132908	chr12:50263148	A	G	Body mass index adjusted for smoking	28443625	0.0283	5.07e-11	147521	IVNT
	rs10513801	chr3:185822353	G	T	Body mass index adjusted for smoking in females	28443625	-0.0426	5.04e-11	130732	IVNT
	rs9680376	chr21:46583406	A	G	Body mass index	UKBB	0.01596	4.91e-11	336107	IVNT
	rs7923837	chr10:94481917	A	G	Body mass index	28892062	0.02925	4.86e-11	173430	IVNT
	rs12641981	chr4:45179883	C	T	Body mass index ajusted for physical activity in females	28448500	-0.0311	4.79e-11	114444	IVNT
	rs12641981	chr4:45179883	C	T	Body mass index ajusted for physical activity in females	28448500	-0.0311	4.79e-11	114444	IVNT
	rs7141420	chr14:79899454	C	T	Body mass index in non-smokers	28443625	-0.0237	4.39e-11	187389	IVNT
	rs8050136	chr16:53816275	A	C	Body mass index	29273807	0.058	4.2e-11	29398	IVNT
	rs7141420	chr14:79899454	C	T	BMI in non smokers	28443625	-0.0237	4e-11	-	kg/m
	rs7903146	chr10:114758349	C	T	Body mass index in males	25673413	0.0294	3.89e-11	152877	IVNT
	rs7903146	chr10:114758349	C	T	Body mass index in males	25673413	0.0294	3.89e-11	152877	IVNT
	rs7903146	chr10:114758349	C	T	Body mass index in males	25673413	0.0294	3.89e-11	152877	IVNT
	rs7903146	chr10:114758349	C	T	Body mass index in males	25673413	0.0294	3.89e-11	152877	IVNT
	rs7903146	chr10:114758349	C	T	Body mass index in males	25673413	0.0294	3.89e-11	152877	IVNT
	rs17309930	chr11:27748493	A	C	Body mass index in females	25673413	0.0325	3.86e-11	169873	IVNT
	rs7903146	chr10:114758349	C	T	Body mass index	28892062	0.05685	3.85e-11	173430	IVNT
	rs7903146	chr10:114758349	C	T	Body mass index	28892062	0.05685	3.85e-11	173430	IVNT
	rs7903146	chr10:114758349	C	T	Body mass index	28892062	0.05685	3.85e-11	173430	IVNT
	rs7903146	chr10:114758349	C	T	Body mass index	28892062	0.05685	3.85e-11	173430	IVNT
	rs7903146	chr10:114758349	C	T	Body mass index	28892062	0.05685	3.85e-11	173430	IVNT
	rs2613505	chr1:72835410	T	C	Body mass index in non-smokers	28443625	0.032	3.66e-11	189513	IVNT
	rs6804915	chr3:170627909	A	C	Body mass index	UKBB	0.01754	3.48e-11	336107	IVNT
	rs12454712	chr18:60845884	C	T	Body mass index	28892062	0.018	3e-11	-	kg/m
	rs12454712	chr18:60845884	C	T	Body mass index	28892062	0.018	3e-11	-	kg/m
	rs12454712	chr18:60845884	C	T	Body mass index	28892062	0.018	3e-11	-	kg/m
	rs12454712	chr18:60845884	C	T	Body mass index	28892062	0.018	3e-11	-	kg/m
	rs12454712	chr18:60845884	C	T	Body mass index	28892062	0.018	3e-11	-	kg/m
	rs12454712	chr18:60845884	C	T	Body mass index	28892062	0.018	3e-11	-	kg/m
	rs2112347	chr5:75015242	G	T	Body mass index	28892062	-0.0239	2.91e-11	173430	IVNT
	rs4985451	chr16:69945092	C	T	Body mass index	UKBB	-0.01699	2.68e-11	336107	IVNT
	rs2112347	chr5:75015242	G	T	Body mass index in non-smokers	28443625	-0.0272	2.62e-11	163682	IVNT
	rs7613875	chr3:49971514	A	C	Body mass index	29273807	0.015	2.6e-11	526508	IVNT
	rs62120394	chr19:18338709	A	G	Body mass index	UKBB	0.01771	2.6e-11	336107	IVNT
	rs1126930	chr12:49399132	C	G	Body mass index	29273807	0.039	2.6e-11	449889	IVNT
	rs1126930	chr12:49399132	C	G	Body mass index	29273807	0.039	2.6e-11	449889	IVNT
	rs1126930	chr12:49399132	C	G	Body mass index	29273807	0.039	2.6e-11	449889	IVNT
	rs1126930	chr12:49399132	C	G	Body mass index	29273807	0.039	2.6e-11	449889	IVNT
	rs10513801	chr3:185822353	G	T	Body mass index	20935630	NA	2.6e-11	123866	IVNT
	rs10513801	chr3:185822353	G	T	Body mass index	20935630	NA	2.6e-11	123865	-
	rs7141420	chr14:79899454	C	T	Body mass index adjusted for smoking in females	28443625	-0.0278	2.58e-11	135820	IVNT
	rs1516725	chr3:185824004	C	T	Body mass index in physically active females	28448500	0.0486	2.45e-11	88572	IVNT
	rs1516725	chr3:185824004	C	T	Body mass index in physically active females	28448500	0.0486	2.45e-11	88572	IVNT
	rs2307111	chr5:75003678	T	C	Body mass index in females	25673413	0.0264	2.44e-11	171827	IVNT
	rs2307111	chr5:75003678	T	C	Body mass index in females	25673413	0.0264	2.44e-11	171827	IVNT
	rs2307111	chr5:75003678	T	C	Body mass index in females	25673413	0.0264	2.44e-11	171827	IVNT
	rs7141420	chr14:79899454	C	T	Body mass index adjusted for smoking	28443625	-0.023	2.21e-11	206880	IVNT
	rs2531995	chr16:4013467	T	C	Body mass index adjusted for physical activity	28448500	0.0291	2.14e-11	149790	IVNT
	rs7012814	chr8:9173358	A	G	Body mass index	UKBB	0.01623	2.11e-11	336107	IVNT
	rs7012814	chr8:9173358	A	G	Body mass index	UKBB	0.01623	2.11e-11	336107	IVNT
	rs7012814	chr8:9173358	A	G	Body mass index	UKBB	0.01623	2.11e-11	336107	IVNT
	rs7012814	chr8:9173358	A	G	Body mass index	UKBB	0.01623	2.11e-11	336107	IVNT
	rs7012637	chr8:9173209	A	G	Body mass index	UKBB	0.01624	2.09e-11	336107	IVNT
	rs17149760	chr8:9183207	A	G	Body mass index	UKBB	0.01872	2.09e-11	336107	IVNT
	rs1516725	chr3:185824004	C	T	Body mass index	20935630	NA	1.99e-11	123866	IVNT
	rs1516725	chr3:185824004	C	T	Body mass index	20935630	NA	1.99e-11	123865	-
	rs1516725	chr3:185824004	C	T	Body mass index	20935630	NA	1.99e-11	123866	IVNT
	rs1516725	chr3:185824004	C	T	Body mass index	20935630	NA	1.99e-11	123865	-
	rs10838782	chr11:47877800	A	G	Body mass index	23754948	0.02987	1.97e-11	126535	IVNT
	rs1519480	chr11:27675712	C	T	Body mass index	28892062	0.0277	1.95e-11	173430	IVNT
	rs34149579	chr12:123345509	G	T	Body mass index	UKBB	0.03613	1.78e-11	336107	IVNT
	rs1457489	chr18:57861961	A	G	Body mass index females	28892062	0.04222	1.78e-11	82438	IVNT
	rs523288	chr18:57848369	T	A	Body mass index in physically inactive indivdiuals	28448500	0.0559	1.65e-11	46324	IVNT
	rs1516725	chr3:185824004	C	T	Body mass index adjusted for smoking in females	28443625	0.0408	1.64e-11	137426	IVNT
	rs1516725	chr3:185824004	C	T	Body mass index adjusted for smoking in females	28443625	0.0408	1.64e-11	137426	IVNT
	rs2303108	chr19:47589895	C	T	Body mass index adjusted for smoking	28443625	0.0267	1.61e-11	184017	IVNT
	rs7903146	chr10:114758349	C	T	Body mass index in males greater than 50 years of age	26426971	0.037	1.5e-11	91689	IVNT
	rs7903146	chr10:114758349	C	T	Body mass index in males greater than 50 years of age	26426971	0.037	1.5e-11	91689	IVNT
	rs7903146	chr10:114758349	C	T	Body mass index in males greater than 50 years of age	26426971	0.037	1.5e-11	91689	IVNT
	rs7903146	chr10:114758349	C	T	Body mass index in males greater than 50 years of age	26426971	0.037	1.5e-11	91689	IVNT
	rs7903146	chr10:114758349	C	T	Body mass index in males greater than 50 years of age	26426971	0.037	1.5e-11	91689	IVNT
	rs7141420	chr14:79899454	C	T	Body mass index ajusted for physical activity in females	28448500	-0.0303	1.47e-11	114491	IVNT
	rs7141420	chr14:79899454	C	T	Body mass index in females	25673413	-0.0262	1.45e-11	171881	IVNT
	rs559623	chr18:57843875	C	A	Body mass index in physically active indivdiuals	28448500	0.0317	1.27e-11	110384	IVNT
	rs10513801	chr3:185822353	G	T	Body mass index in females less than or equal to 50 years of age	26426971	-0.062	1.2e-11	59463	IVNT
	rs1519480	chr11:27675712	C	T	Body mass index in males greater than 50 years of age	26426971	0.035	1.2e-11	92430	IVNT
	rs10513801	chr3:185822353	G	T	Body mass index in physically active indivdiuals	28448500	-0.041	1.13e-11	148688	IVNT
	rs7903146	chr10:114758349	C	T	Body mass index	25673413	0.0234	1.11e-11	322130	IVNT
	rs7903146	chr10:114758349	C	T	Body mass index	25673413	0.0234	1.11e-11	322130	IVNT
	rs7903146	chr10:114758349	C	T	Body mass index	25673413	0.0234	1.11e-11	322130	IVNT
	rs7903146	chr10:114758349	C	T	Body mass index	25673413	0.0234	1.11e-11	322130	IVNT
	rs7903146	chr10:114758349	C	T	Body mass index	25673413	0.0234	1.11e-11	322130	IVNT
	rs1516725	chr3:185824004	C	T	Body mass index in females less than or equal to 50 years of age	26426971	0.06	1.1e-11	64134	IVNT
	rs1516725	chr3:185824004	C	T	Body mass index in females less than or equal to 50 years of age	26426971	0.06	1.1e-11	64134	IVNT
	rs7766070	chr6:20686573	A	C	Body mass index females	28892062	-0.03708	1.09e-11	82438	IVNT
	rs10767659	chr11:27686196	G	T	Body mass index	28892062	0.02868	1.02e-11	173430	IVNT
	rs7903146	chr10:114758349	C	T	Body mass index	25673413	0.023	1e-11	-	kg/m2 increase
	rs7903146	chr10:114758349	C	T	Body mass index	25673413	0.023	1e-11	-	kg/m2 increase
	rs7903146	chr10:114758349	C	T	Body mass index	25673413	0.023	1e-11	-	kg/m2 increase
	rs7903146	chr10:114758349	C	T	Body mass index	25673413	0.023	1e-11	-	kg/m2 increase
	rs7903146	chr10:114758349	C	T	Body mass index	25673413	0.023	1e-11	-	kg/m2 increase
	rs7141420	chr14:79899454	C	T	Body mass index joint analysis main effects and smoking interaction	28443625	NA	1e-11	-	-
	rs17309930	chr11:27748493	A	C	Body mass index adjusted for smoking	28443625	0.0287	9.75e-12	236111	IVNT
	rs2531995	chr16:4013467	T	C	Body mass index adjusted for physical activity	28448500	0.0311	9.54e-12	138141	IVNT
	rs523288	chr18:57848369	T	A	Body mass index in physically inactive indivdiuals	28448500	0.0615	9.2e-12	41999	IVNT
	rs687339	chr3:135932359	C	T	Body mass index	UKBB	-0.01955	9.18e-12	336107	IVNT
	rs10513801	chr3:185822353	G	T	Body mass index in males	25673413	-0.0422	8.67e-12	147533	IVNT
	rs2403102	chr14:103306215	A	G	Body mass index	UKBB	0.02051	8.59e-12	336107	IVNT
	rs17309930	chr11:27748493	A	C	Body mass index adjusted for smoking	28443625	0.0298	8.57e-12	205749	IVNT
	rs2307111	chr5:75003678	T	C	Body mass index	28892062	0.02436	8.34e-12	173430	IVNT
	rs2307111	chr5:75003678	T	C	Body mass index	28892062	0.02436	8.34e-12	173430	IVNT
	rs2307111	chr5:75003678	T	C	Body mass index	28892062	0.02436	8.34e-12	173430	IVNT
	rs559623	chr18:57843875	C	A	Body mass index in male non-smokers	28443625	0.0421	8.16e-12	58942	IVNT
	rs1516725	chr3:185824004	C	T	Body mass index joint analysis main effects and smoking interaction	28443625	NA	8e-12	-	-
	rs1516725	chr3:185824004	C	T	Body mass index joint analysis main effects and smoking interaction	28443625	NA	8e-12	-	-
	rs10513801	chr3:185822353	G	T	Body mass index in physically active indivdiuals	28448500	-0.0424	7.78e-12	136780	IVNT
	rs6555936	chr5:170610273	A	G	Body mass index	UKBB	0.01806	6.91e-12	336107	IVNT
	rs523288	chr18:57848369	T	A	Body mass index in smokers	28443625	0.0576	6.57e-12	45193	IVNT
	rs2112347	chr5:75015242	G	T	Body mass index in non-smokers	28443625	-0.0258	6.49e-12	188294	IVNT
	rs2229616	chr18:58039276	T	C	Body mass index	23001569	NA	6.39e-12	78436	-
	rs2229616	chr18:58039276	T	C	Body mass index in females	25673413	-0.1034	6.17e-12	154126	IVNT
	rs2112347	chr5:75015242	G	T	BMI in non smokers	28443625	-0.0258	6e-12	-	kg/m
	rs1516725	chr3:185824004	C	T	Body mass index in physically active indivdiuals	28448500	0.0426	5.91e-12	137260	IVNT
	rs1516725	chr3:185824004	C	T	Body mass index in physically active indivdiuals	28448500	0.0426	5.91e-12	137260	IVNT
	rs559623	chr18:57843875	C	A	Body mass index in physically active indivdiuals	28448500	0.0312	5.6e-12	117299	IVNT
	rs68033110	chr18:57914679	A	G	Body mass index	28892062	0.03574	5.58e-12	173430	IVNT
	rs731839	chr19:33899065	G	A	Body mass index	22885924	NA	5.13e-12	133010	-
	rs731839	chr19:33899065	G	A	Body mass index	22885924	NA	5.13e-12	133010	-
	rs731839	chr19:33899065	G	A	Body mass index	22885924	NA	5.13e-12	133010	-
	rs731839	chr19:33899065	G	A	Body mass index	22885924	NA	5.13e-12	133010	-
	rs7141420	chr14:79899454	C	T	BMI adjusted for smoking behaviour	28443625	-0.022	5e-12	-	kg/m
	rs2613504	chr1:72835740	G	A	Body mass index	25673413	-0.0388	4.83e-12	160977	IVNT
	rs7141420	chr14:79899454	C	T	Body mass index adjusted for smoking	28443625	-0.022	4.54e-12	237242	IVNT
	rs1457489	chr18:57861961	A	G	Body mass index in females	23754948	0.049	4.43e-12	67956	IVNT
	rs559623	chr18:57843875	C	A	Body mass index adjsuted for physical activity in males	28448500	0.0416	4.33e-12	63723	IVNT
	rs7141420	chr14:79899454	C	T	Body mass index in females greater than 50 years of age	26426971	-0.032	4.3e-12	103002	IVNT
	rs10838782	chr11:47877800	A	G	Body mass index	25673413	0.0211	4.3e-12	322078	IVNT
	rs2613504	chr1:72835740	G	A	Body mass index	25673413	-0.0372	4.09e-12	175881	IVNT
	rs11030107	chr11:27694835	A	G	Body mass index in females	25673413	-0.031	4.08e-12	171650	IVNT
	rs7132908	chr12:50263148	A	G	Body mass index adjusted for physical activity	28448500	0.032	4.07e-12	130121	IVNT
	rs7132908	chr12:50263148	A	G	Body mass index adjusted for physical activity	28448500	0.032	4.07e-12	130121	IVNT
	rs2613505	chr1:72835410	T	C	Body mass index adjusted for smoking in males	28443625	0.0437	4.05e-12	102198	IVNT
	rs559623	chr18:57843875	C	A	Body mass index in males	25673413	0.0347	3.92e-12	104573	IVNT
	rs10797119	chr9:92202495	C	T	Body mass index	UKBB	0.01683	3.64e-12	336107	IVNT
	rs2303108	chr19:47589895	C	T	Body mass index	25673413	0.0223	3.6e-12	339165	IVNT
	rs17066842	chr18:58040624	A	G	Body mass index adjusted for physical activity	28448500	-0.068	3.51e-12	176266	IVNT
	rs2737252	chr8:116663898	A	G	Body mass index	UKBB	-0.01854	3.44e-12	336107	IVNT
	rs2737263	chr8:116667539	G	T	Body mass index	UKBB	0.01853	3.43e-12	336107	IVNT
	rs2737263	chr8:116667539	G	T	Body mass index	UKBB	0.01853	3.43e-12	336107	IVNT
	rs1457489	chr18:57861961	A	G	Body mass index in males greater than 50 years of age	26426971	0.039	3.4e-12	92267	IVNT
	rs7613875	chr3:49971514	A	C	Body mass index	29273807	0.016	3.2e-12	449889	IVNT
	rs4788113	chr16:28992000	A	G	Body mass index	UKBB	-0.01751	2.7e-12	336107	IVNT
	rs1905505	chr3:170695426	G	A	Body mass index	UKBB	-0.01864	2.64e-12	336107	IVNT
	rs1126930	chr12:49399132	C	G	Body mass index	29273807	0.04	2.6e-12	526508	IVNT
	rs1126930	chr12:49399132	C	G	Body mass index	29273807	0.04	2.6e-12	526508	IVNT
	rs1126930	chr12:49399132	C	G	Body mass index	29273807	0.04	2.6e-12	526508	IVNT
	rs1126930	chr12:49399132	C	G	Body mass index	29273807	0.04	2.6e-12	526508	IVNT
	rs12868517	chr13:58727633	G	T	Body mass index	UKBB	-0.01961	2.57e-12	336107	IVNT
	rs1154988	chr3:135925191	A	T	Body mass index	UKBB	0.02011	2.47e-12	336107	IVNT
	rs4867646	chr5:170580152	C	T	Body mass index	UKBB	0.01849	2.35e-12	336107	IVNT
	rs4867646	chr5:170580152	C	T	Body mass index	UKBB	0.01849	2.35e-12	336107	IVNT
	rs111908763	chr14:79932823	C	T	Body mass index	UKBB	-0.02106	2.34e-12	336107	IVNT
	rs12641981	chr4:45179883	C	T	Body mass index in female non-smokers	28443625	-0.034	2.33e-12	111979	IVNT
	rs12641981	chr4:45179883	C	T	Body mass index in female non-smokers	28443625	-0.034	2.33e-12	111979	IVNT
	rs2303108	chr19:47589895	C	T	Body mass index adjusted for smoking	28443625	0.0256	2.14e-12	212600	IVNT
	rs2112347	chr5:75015242	G	T	Body mass index adjusted for smoking	28443625	-0.0249	2.09e-12	209246	IVNT
	rs684773	chr3:135956305	C	A	Body mass index	UKBB	0.01997	2.08e-12	336107	IVNT
	rs684773	chr3:135956305	C	A	Body mass index	UKBB	0.01997	2.08e-12	336107	IVNT
	rs7141420	chr14:79899454	C	T	Body mass index adjusted for physical activity	28448500	-0.0248	2.04e-12	196804	IVNT
	rs1516725	chr3:185824004	C	T	Body mass index in physically active indivdiuals	28448500	0.0414	1.88e-12	149222	IVNT
	rs1516725	chr3:185824004	C	T	Body mass index in physically active indivdiuals	28448500	0.0414	1.88e-12	149222	IVNT
	rs12641981	chr4:45179883	C	T	Body mass index in females	23754948	-0.046	1.83e-12	67945	IVNT
	rs12641981	chr4:45179883	C	T	Body mass index in females	23754948	-0.046	1.83e-12	67945	IVNT
	rs13107325	chr4:103188709	T	C	Body mass index	25673413	0.0477	1.82e-12	321461	IVNT
	rs13107325	chr4:103188709	T	C	Body mass index	25673413	0.0477	1.82e-12	321461	IVNT
	rs13107325	chr4:103188709	T	C	Body mass index	25673413	0.0477	1.82e-12	321461	IVNT
	rs13107325	chr4:103188709	T	C	Body mass index	25673413	0.0477	1.82e-12	321461	IVNT
	rs13107325	chr4:103188709	T	C	Body mass index	25673413	0.0477	1.82e-12	321461	IVNT
	rs13107325	chr4:103188709	T	C	Body mass index	25673413	0.0477	1.82e-12	321461	IVNT
	rs11871606	chr17:45732774	A	C	Body mass index	29273807	0.016	1.8e-12	449889	IVNT
	rs10865959	chr3:49891002	C	G	Body mass index	UKBB	0.01815	1.78e-12	336107	IVNT
	rs10865959	chr3:49891002	C	G	Body mass index	UKBB	0.01815	1.78e-12	336107	IVNT
	rs10865959	chr3:49891002	C	G	Body mass index	UKBB	0.01815	1.78e-12	336107	IVNT
	rs10865959	chr3:49891002	C	G	Body mass index	UKBB	0.01815	1.78e-12	336107	IVNT
	rs11150617	chr16:31372290	C	T	Body mass index	UKBB	-0.01784	1.64e-12	336107	IVNT
	rs559623	chr18:57843875	C	A	Body mass index females	28892062	0.04161	1.59e-12	82438	IVNT
	rs1519480	chr11:27675712	C	T	Body mass index in females	25673413	0.0298	1.58e-12	171959	IVNT
	rs2613505	chr1:72835410	T	C	Body mass index	23754948	0.04094	1.58e-12	126572	IVNT
	rs1279840	chr3:136006576	C	T	Body mass index	UKBB	0.01966	1.56e-12	336107	IVNT
	rs2229616	chr18:58039276	T	C	Body mass index adjusted for smoking	28443625	-0.0924	1.1e-12	193921	IVNT
	rs10838782	chr11:47877800	A	G	Body mass index	25673413	0.0209	1.1e-12	339102	IVNT
	rs7903146	chr10:114758349	C	T	Body mass index	25673413	0.0235	1.1e-12	339198	IVNT
	rs7903146	chr10:114758349	C	T	Body mass index	25673413	0.0235	1.1e-12	339198	IVNT
	rs7903146	chr10:114758349	C	T	Body mass index	25673413	0.0235	1.1e-12	339198	IVNT
	rs7903146	chr10:114758349	C	T	Body mass index	25673413	0.0235	1.1e-12	339198	IVNT
	rs7903146	chr10:114758349	C	T	Body mass index	25673413	0.0235	1.1e-12	339198	IVNT
	rs13107325	chr4:103188709	T	C	Body mass index	25673413	0.0472	1.06e-12	335619	IVNT
	rs13107325	chr4:103188709	T	C	Body mass index	25673413	0.0472	1.06e-12	335619	IVNT
	rs13107325	chr4:103188709	T	C	Body mass index	25673413	0.0472	1.06e-12	335619	IVNT
	rs13107325	chr4:103188709	T	C	Body mass index	25673413	0.0472	1.06e-12	335619	IVNT
	rs13107325	chr4:103188709	T	C	Body mass index	25673413	0.0472	1.06e-12	335619	IVNT
	rs13107325	chr4:103188709	T	C	Body mass index	25673413	0.0472	1.06e-12	335619	IVNT
	rs1516725	chr3:185824004	C	T	Body mass index in males	25673413	0.0439	1.05e-12	152306	IVNT
	rs1516725	chr3:185824004	C	T	Body mass index in males	25673413	0.0439	1.05e-12	152306	IVNT
	rs35895680	chr17:47060322	A	C	Body mass index	UKBB	-0.01839	1.02e-12	336107	IVNT
	rs35895680	chr17:47060322	A	C	Body mass index	UKBB	-0.01839	1.02e-12	336107	IVNT
	rs35895680	chr17:47060322	A	C	Body mass index	UKBB	-0.01839	1.02e-12	336107	IVNT
	rs12641981	chr4:45179883	C	T	Body mass index joint analysis main effects and physical activity interaction	28448500	NA	1e-12	-	-
	rs12641981	chr4:45179883	C	T	Body mass index joint analysis main effects and physical activity interaction	28448500	NA	1e-12	-	-
	rs10513801	chr3:185822353	G	T	Body mass index	23754948	-0.04644	9.13e-13	126577	IVNT
	rs3850986	chr15:73091283	G	T	Body mass index	UKBB	-0.01836	8.41e-13	336107	IVNT
	rs12641981	chr4:45179883	C	T	Body mass index	28892062	-0.02776	7.62e-13	173430	IVNT
	rs12641981	chr4:45179883	C	T	Body mass index	28892062	-0.02776	7.62e-13	173430	IVNT
	rs2303108	chr19:47589895	C	T	Body mass index	25673413	0.024	7.04e-13	322106	IVNT
	rs429358	chr19:45411941	C	T	Body mass index	UKBB	-0.02377	6.62e-13	336107	IVNT
	rs523288	chr18:57848369	T	A	Body mass index in males	23754948	0.054	5.69e-13	58618	IVNT
	rs7132908	chr12:50263148	A	G	Body mass index adjusted for smoking	28443625	0.0293	5.3e-13	167755	IVNT
	rs7132908	chr12:50263148	A	G	Body mass index adjusted for smoking	28443625	0.0293	5.3e-13	167755	IVNT
	rs1516725	chr3:185824004	C	T	Body mass index	23754948	0.04696	5.08e-13	126577	IVNT
	rs1516725	chr3:185824004	C	T	Body mass index	23754948	0.04696	5.08e-13	126577	IVNT
	rs10811661	chr9:22134094	C	T	Body mass index	28892062	0.021	5e-13	-	kg/m
	rs559623	chr18:57843875	C	A	Body mass index	20935630	NA	4.41e-13	123862	IVNT
	rs559623	chr18:57843875	C	A	Body mass index	20935630	NA	4.41e-13	123865	-
	rs12641981	chr4:45179883	C	T	Body mass index adjusted for smoking in females	28443625	-0.0314	4.01e-13	137660	IVNT
	rs12641981	chr4:45179883	C	T	Body mass index adjusted for smoking in females	28443625	-0.0314	4.01e-13	137660	IVNT
	rs145878042	chr12:48143315	A	G	Body mass index	29273807	-0.072	3.4e-13	449889	IVNT
	rs1457489	chr18:57861961	A	G	Body mass index in females greater than 50 years of age	26426971	0.039	3.4e-13	105124	IVNT
	rs10513801	chr3:185822353	G	T	Body mass index ajusted for physical activity in females	28448500	-0.0502	3.24e-13	114767	IVNT
	rs10518739	chr15:68014971	C	T	Body mass index	UKBB	-0.01753	3.19e-13	336107	IVNT
	rs2229616	chr18:58039276	T	C	Body mass index adjusted for physical activity	28448500	-0.1024	3.15e-13	171373	IVNT
	rs2112347	chr5:75015242	G	T	Body mass index in females	25673413	-0.0298	3.15e-13	171899	IVNT
	rs2112347	chr5:75015242	G	T	Body mass index 30 kgm2	23563607	NA	2.88e-13	16068	-
	rs1516725	chr3:185824004	C	T	Body mass index ajusted for physical activity in females	28448500	0.0484	2.78e-13	115213	IVNT
	rs1516725	chr3:185824004	C	T	Body mass index ajusted for physical activity in females	28448500	0.0484	2.78e-13	115213	IVNT
	rs4481184	chr3:185505787	C	T	Body mass index males	28892062	0.03807	2.21e-13	90992	IVNT
	rs11929397	chr3:185510190	C	T	Body mass index males	28892062	-0.03808	2.2e-13	90992	IVNT
	rs2112347	chr5:75015242	G	T	Body mass index	20935630	NA	2.17e-13	123865	-
	rs2112347	chr5:75015242	G	T	Body mass index	23001569	NA	2.17e-13	78436	-
	rs2112347	chr5:75015242	G	T	Body mass index	20935630	-0.1	2e-13	-	kg/m2 increase
	rs13107325	chr4:103188709	T	C	Body mass index	20935630	0.19	2e-13	-	kg/m2 increase
	rs13107325	chr4:103188709	T	C	Body mass index	20935630	0.19	2e-13	-	kg/m2 increase
	rs13107325	chr4:103188709	T	C	Body mass index	20935630	0.19	2e-13	-	kg/m2 increase
	rs13107325	chr4:103188709	T	C	Body mass index	20935630	0.19	2e-13	-	kg/m2 increase
	rs13107325	chr4:103188709	T	C	Body mass index	20935630	0.19	2e-13	-	kg/m2 increase
	rs13107325	chr4:103188709	T	C	Body mass index	20935630	0.19	2e-13	-	kg/m2 increase
	rs13107325	chr4:103188709	T	C	Body mass index	20935630	NA	2e-13	-	-
	rs13107325	chr4:103188709	T	C	Body mass index	20935630	NA	2e-13	-	-
	rs2112347	chr5:75015242	G	T	Body mass index	20935630	NA	2e-13	-	-
	rs13107325	chr4:103188709	T	C	Body mass index	20935630	NA	2e-13	-	-
	rs13107325	chr4:103188709	T	C	Body mass index	20935630	NA	2e-13	-	-
	rs13107325	chr4:103188709	T	C	Body mass index	20935630	NA	2e-13	-	-
	rs13107325	chr4:103188709	T	C	Body mass index	20935630	NA	2e-13	-	-
	rs10811661	chr9:22134094	C	T	Body mass index males	28892062	0.03959	1.82e-13	90992	IVNT
	rs10811660	chr9:22134068	A	G	Body mass index males	28892062	0.03959	1.78e-13	90992	IVNT
	rs6931514	chr6:20703952	A	G	Body mass index males	28892062	0.03557	1.62e-13	90992	IVNT
	rs6857	chr19:45392254	T	C	Body mass index	UKBB	-0.02356	1.5e-13	336107	IVNT
	rs13107325	chr4:103188709	T	C	Body mass index	20935630	NA	1.5e-13	123865	-
	rs13107325	chr4:103188709	T	C	Body mass index	23001569	NA	1.5e-13	78436	-
	rs13107325	chr4:103188709	T	C	Body mass index	20935630	NA	1.5e-13	123865	-
	rs13107325	chr4:103188709	T	C	Body mass index	23001569	NA	1.5e-13	78436	-
	rs13107325	chr4:103188709	T	C	Body mass index	20935630	NA	1.5e-13	123865	-
	rs13107325	chr4:103188709	T	C	Body mass index	23001569	NA	1.5e-13	78436	-
	rs13107325	chr4:103188709	T	C	Body mass index	20935630	NA	1.5e-13	123865	-
	rs13107325	chr4:103188709	T	C	Body mass index	23001569	NA	1.5e-13	78436	-
	rs13107325	chr4:103188709	T	C	Body mass index	20935630	NA	1.5e-13	123865	-
	rs13107325	chr4:103188709	T	C	Body mass index	23001569	NA	1.5e-13	78436	-
	rs13107325	chr4:103188709	T	C	Body mass index	20935630	NA	1.5e-13	123865	-
	rs13107325	chr4:103188709	T	C	Body mass index	23001569	NA	1.5e-13	78436	-
	rs12641981	chr4:45179883	C	T	Body mass index in physically active indivdiuals	28448500	-0.0317	1.31e-13	137138	IVNT
	rs12641981	chr4:45179883	C	T	Body mass index in physically active indivdiuals	28448500	-0.0317	1.31e-13	137138	IVNT
	rs61742688	chr16:19883364	A	G	Body mass index	UKBB	-0.02573	1.27e-13	336107	IVNT
	rs17309930	chr11:27748493	A	C	Body mass index	25673413	0.0288	1.25e-13	317922	IVNT
	rs7132908	chr12:50263148	A	G	Body mass index	25673413	0.0341	1.23e-13	178941	IVNT
	rs7132908	chr12:50263148	A	G	Body mass index	25673413	0.0341	1.23e-13	178941	IVNT
	rs12641981	chr4:45179883	C	T	Body mass index adjsuted for physical activity in males	28448500	-0.0397	1.21e-13	82232	IVNT
	rs12641981	chr4:45179883	C	T	Body mass index adjsuted for physical activity in males	28448500	-0.0397	1.21e-13	82232	IVNT
	rs62136856	chr19:47573527	A	G	Body mass index	29273807	-0.019	1.2e-13	449889	IVNT
	rs2510344	chr18:21113285	T	C	Body mass index	UKBB	0.01783	1.2e-13	336107	IVNT
	rs2229616	chr18:58039276	T	C	Body mass index	25673413	-0.0882	1.09e-13	287276	IVNT
	rs9273363	chr6:32626272	A	C	Body mass index	28892062	-0.02679	1.08e-13	173430	IVNT
	rs140604451	chr1:110216436	A	G	Body mass index	UKBB	0.05795	1.08e-13	336107	IVNT
	rs140604451	chr1:110216436	A	G	Body mass index	UKBB	0.05795	1.08e-13	336107	IVNT
	rs8107376	chr19:46163769	C	T	Body mass index	28892062	-0.02793	1.07e-13	173430	IVNT
	rs2112347	chr5:75015242	G	T	Body mass index adjusted for smoking	28443625	-0.0242	1.04e-13	238204	IVNT
	rs12641981	chr4:45179883	C	T	Body mass index	28448500	-0.0397	1e-13	-	kg/m
	rs12641981	chr4:45179883	C	T	Body mass index	28448500	-0.0397	1e-13	-	kg/m
	rs12150387	chr17:34841669	A	C	Body mass index	UKBB	-0.01803	9.69e-14	336107	IVNT
	rs57440424	chr18:21108614	A	G	Body mass index	UKBB	-0.01796	9.06e-14	336107	IVNT
	rs17066842	chr18:58040624	A	G	Body mass index	25673413	-0.0568	8.99e-14	311465	IVNT
	rs7451008	chr6:20673880	C	T	Body mass index males	28892062	-0.03647	8.67e-14	90992	IVNT
	rs559623	chr18:57843875	C	A	Body mass index adjusted for physical activity	28448500	0.0317	8.17e-14	141731	IVNT
	rs694994	chr11:65653309	C	T	Body mass index	UKBB	0.02243	7.95e-14	336107	IVNT
	rs523288	chr18:57848369	T	A	Body mass index in females	23754948	0.054	7.16e-14	67956	IVNT
	rs17066842	chr18:58040624	A	G	Body mass index	25673413	-0.0626	6.4e-14	296556	IVNT
	rs12641981	chr4:45179883	C	T	Body mass index adjusted for smoking in males	28443625	-0.0357	6.34e-14	102722	IVNT
	rs12641981	chr4:45179883	C	T	Body mass index adjusted for smoking in males	28443625	-0.0357	6.34e-14	102722	IVNT
	rs2306589	chr17:34848874	C	T	Body mass index	UKBB	-0.01807	6.26e-14	336107	IVNT
	rs2306589	chr17:34848874	C	T	Body mass index	UKBB	-0.01807	6.26e-14	336107	IVNT
	rs10513801	chr3:185822353	G	T	Body mass index adjusted for smoking	28443625	-0.0375	5.54e-14	227416	IVNT
	rs6507720	chr18:21119291	A	G	Body mass index	UKBB	0.01808	5.29e-14	336107	IVNT
	rs145878042	chr12:48143315	A	G	Body mass index	29273807	-0.074	5.2e-14	526508	IVNT
	rs8057044	chr16:53812614	A	G	Body mass index in physically inactive females	28448500	0.0713	4.84e-14	26640	IVNT
	rs1519480	chr11:27675712	C	T	Body mass index in males	25673413	0.0323	4.82e-14	152871	IVNT
	rs2613505	chr1:72835410	T	C	Body mass index adjusted for smoking	28443625	0.0335	4.69e-14	209334	IVNT
	rs1652343	chr18:21131929	T	C	Body mass index	UKBB	0.01815	4.17e-14	336107	IVNT
	rs76967117	chr6:34603691	A	G	Body mass index	UKBB	0.0284	4.07e-14	336107	IVNT
	rs76967117	chr6:34603691	A	G	Body mass index	UKBB	0.0284	4.07e-14	336107	IVNT
	rs1652344	chr18:21128857	T	C	Body mass index	UKBB	0.01818	3.97e-14	336107	IVNT
	rs1519480	chr11:27675712	C	T	Body mass index adjusted for physical activity	28448500	0.03	3.8e-14	180408	IVNT
	rs2307111	chr5:75003678	T	C	Body mass index	25673413	0.0235	3.77e-14	321937	IVNT
	rs2307111	chr5:75003678	T	C	Body mass index	25673413	0.0235	3.77e-14	321937	IVNT
	rs2307111	chr5:75003678	T	C	Body mass index	25673413	0.0235	3.77e-14	321937	IVNT
	rs1121980	chr16:53809247	G	A	Body mass index in physically inactive males	28448500	-0.077	3.66e-14	22037	IVNT
	rs2229616	chr18:58039276	T	C	Body mass index adjusted for physical activity	28448500	-0.1005	3.59e-14	191073	IVNT
	rs7132908	chr12:50263148	A	G	Body mass index	25673413	0.0341	3.52e-14	181103	IVNT
	rs7132908	chr12:50263148	A	G	Body mass index	25673413	0.0341	3.52e-14	181103	IVNT
	rs1457489	chr18:57861961	A	G	Body mass index males	28892062	0.04368	3.21e-14	90992	IVNT
	rs1457489	chr18:57861961	A	G	Body mass index in smokers	28443625	0.0608	3e-14	45812	IVNT
	rs8057044	chr16:53812614	A	G	Body mass index in female smokers	28443625	0.071	2.82e-14	26133	IVNT
	rs2303108	chr19:47589895	C	T	Body mass index	29273807	0.019	2.8e-14	449889	IVNT
	rs523288	chr18:57848369	T	A	Body mass index in males greater than 50 years of age	26426971	0.044	2.8e-14	90736	IVNT
	rs12641981	chr4:45179883	C	T	Body mass index in physically active indivdiuals	28448500	-0.0315	2.72e-14	149121	IVNT
	rs12641981	chr4:45179883	C	T	Body mass index in physically active indivdiuals	28448500	-0.0315	2.72e-14	149121	IVNT
	rs8057044	chr16:53812614	A	G	Body mass index	19557197	NA	2.6e-14	31373	-
	rs9273526	chr6:32628617	A	C	Body mass index	28892062	0.03179	2.41e-14	173430	IVNT
	rs9273526	chr6:32628617	A	C	Body mass index	28892062	0.03179	2.41e-14	173430	IVNT
	rs559623	chr18:57843875	C	A	Body mass index adjusted for smoking in males	28443625	0.0411	2.41e-14	77219	IVNT
	rs9923544	chr16:53801985	C	T	Body mass index in physically inactive males	28448500	-0.0779	2.39e-14	21939	IVNT
	rs12140153	chr1:62579891	T	G	Body mass index	UKBB	-0.03182	2.25e-14	336107	IVNT
	rs12140153	chr1:62579891	T	G	Body mass index	UKBB	-0.03182	2.25e-14	336107	IVNT
	rs12140153	chr1:62579891	T	G	Body mass index	UKBB	-0.03182	2.25e-14	336107	IVNT
	rs12140153	chr1:62579891	T	G	Body mass index	UKBB	-0.03182	2.25e-14	336107	IVNT
	rs12140153	chr1:62579891	T	G	Body mass index	UKBB	-0.03182	2.25e-14	336107	IVNT
	rs115454275	chr1:110192045	C	T	Body mass index	UKBB	-0.05897	2.01e-14	336107	IVNT
	rs62033400	chr16:53811788	A	G	Body mass index	24064335	-0.08	2e-14	-	kg/m2 increase
	rs62033400	chr16:53811788	A	G	Body mass index	24064335	-0.08	2e-14	-	kg/m2 increase
	rs559623	chr18:57843875	C	A	Body mass index in non-smokers	28443625	0.0339	1.88e-14	129054	IVNT
	rs17309930	chr11:27748493	A	C	Body mass index	25673413	0.0286	1.77e-14	334989	IVNT
	rs3800461	chr6:34616322	G	C	Body mass index	UKBB	-0.02882	1.76e-14	336107	IVNT
	rs1519480	chr11:27675712	C	T	Body mass index in non-smokers	28443625	0.0297	1.71e-14	190153	IVNT
	rs58653754	chr16:19977601	A	C	Body mass index	UKBB	-0.02673	1.48e-14	336107	IVNT
	rs8050136	chr16:53816275	A	C	Body mass index	21935397	NA	1.38e-14	5373	-
	rs10513801	chr3:185822353	G	T	Body mass index adjusted for smoking	28443625	-0.0402	1.34e-14	197287	IVNT
	rs7141420	chr14:79899454	C	T	Body mass index	25673413	-0.0235	1.23e-14	321970	IVNT
	rs559623	chr18:57843875	C	A	Body mass index	23754948	0.03436	1.21e-14	126573	IVNT
	rs523288	chr18:57848369	T	A	Body mass index females	28892062	0.04872	1.18e-14	82438	IVNT
	rs1613599	chr2:58966760	T	C	Body mass index	UKBB	0.01869	1.14e-14	336107	IVNT
	rs1613599	chr2:58966760	T	C	Body mass index	UKBB	0.01869	1.14e-14	336107	IVNT
	rs1121980	chr16:53809247	G	A	Body mass index	21935397	NA	1.03e-14	5373	-
	rs9923544	chr16:53801985	C	T	Body mass index	21935397	NA	9.7e-15	5373	-
	rs12577586	chr11:27600435	C	T	Body mass index	25673413	0.0281	9.18e-15	322110	IVNT
	rs7141420	chr14:79899454	C	T	Body mass index	25673413	-0.023	9e-15	-	kg/m2 increase
	rs7141420	chr14:79899454	C	T	Body mass index	25673413	-0.0227	8.66e-15	339040	IVNT
	rs12941009	chr17:34961051	C	T	Body mass index	UKBB	0.01916	8.21e-15	336107	IVNT
	rs8057044	chr16:53812614	A	G	Body mass index in male smokers	28443625	0.0769	8e-15	24483	IVNT
	rs7141420	chr14:79899454	C	T	Body mass index	28892062	-0.019	7e-15	-	kg/m
	rs12790913	chr11:27511998	A	G	Body mass index	25673413	0.0272	6.63e-15	335322	IVNT
	rs11665439	chr18:57889651	A	G	Body mass index	28892062	-0.04039	6.35e-15	173430	IVNT
	rs9938120	chr16:19977733	C	T	Body mass index	UKBB	0.02707	6.34e-15	336107	IVNT
	rs1516725	chr3:185824004	C	T	BMI adjusted for smoking behaviour	28443625	-0.0367	6e-15	-	kg/m
	rs1516725	chr3:185824004	C	T	BMI adjusted for smoking behaviour	28443625	-0.0367	6e-15	-	kg/m
	rs1516725	chr3:185824004	C	T	Body mass index adjusted for smoking	28443625	0.0367	5.88e-15	239600	IVNT
	rs1516725	chr3:185824004	C	T	Body mass index adjusted for smoking	28443625	0.0367	5.88e-15	239600	IVNT
	rs1457489	chr18:57861961	A	G	Body mass index in smokers	28443625	0.0586	5.76e-15	50929	IVNT
	rs7132908	chr12:50263148	A	G	Body mass index 30 kgm2	23563607	NA	5.62e-15	16068	-
	rs7132908	chr12:50263148	A	G	Body mass index 30 kgm2	23563607	NA	5.62e-15	16068	-
	rs12887521	chr14:103247844	A	C	Body mass index	UKBB	-0.01995	3.06e-15	336107	IVNT
	rs10513801	chr3:185822353	G	T	Body mass index adjusted for physical activity	28448500	-0.0427	2.27e-15	198299	IVNT
	rs1519480	chr11:27675712	C	T	Body mass index adjusted for physical activity	28448500	0.0298	2.25e-15	200436	IVNT
	rs7700965	chr5:74356857	C	T	Body mass index	UKBB	-0.01991	2.23e-15	336107	IVNT
	rs2229616	chr18:58039276	T	C	Body mass index	25673413	-0.0899	2.07e-15	303757	IVNT
	rs10513801	chr3:185822353	G	T	Body mass index in females	25673413	-0.0475	2.07e-15	165536	IVNT
	rs12888955	chr14:103256877	A	G	Body mass index	UKBB	-0.02006	2.02e-15	336107	IVNT
	rs12888955	chr14:103256877	A	G	Body mass index	UKBB	-0.02006	2.02e-15	336107	IVNT
	rs1516725	chr3:185824004	C	T	Body mass index	25673413	0.047	2e-15	-	kg/m2 increase
	rs1516725	chr3:185824004	C	T	Body mass index	25673413	0.047	2e-15	-	kg/m2 increase
	rs1516725	chr3:185824004	C	T	Body mass index in females	25673413	0.0466	1.91e-15	171049	IVNT
	rs1516725	chr3:185824004	C	T	Body mass index in females	25673413	0.0466	1.91e-15	171049	IVNT
	rs559623	chr18:57843875	C	A	Body mass index adjusted for physical activity	28448500	0.0324	1.64e-15	155187	IVNT
	rs10513801	chr3:185822353	G	T	Body mass index adjusted for physical activity	28448500	-0.0446	1.63e-15	178370	IVNT
	rs12641981	chr4:45179883	C	T	Body mass index in males greater than 50 years of age	26426971	-0.04	1.6e-15	91479	IVNT
	rs12641981	chr4:45179883	C	T	Body mass index in males greater than 50 years of age	26426971	-0.04	1.6e-15	91479	IVNT
	rs523288	chr18:57848369	T	A	Body mass index in females greater than 50 years of age	26426971	0.045	1.5e-15	104276	IVNT
	rs1516725	chr3:185824004	C	T	Body mass index adjusted for physical activity	28448500	0.045	1.39e-15	179200	IVNT
	rs1516725	chr3:185824004	C	T	Body mass index adjusted for physical activity	28448500	0.045	1.39e-15	179200	IVNT
	rs12577586	chr11:27600435	C	T	Body mass index	25673413	0.0275	9.2e-16	339180	IVNT
	rs11929397	chr3:185510190	C	T	Body mass index	28892062	-0.03076	8.72e-16	173430	IVNT
	rs4481184	chr3:185505787	C	T	Body mass index	28892062	0.03078	8.49e-16	173430	IVNT
	rs2613505	chr1:72835410	T	C	Body mass index adjusted for smoking	28443625	0.0338	7.8e-16	239708	IVNT
	rs1516725	chr3:185824004	C	T	Body mass index adjusted for smoking	28443625	0.0408	7.56e-16	209264	IVNT
	rs1516725	chr3:185824004	C	T	Body mass index adjusted for smoking	28443625	0.0408	7.56e-16	209264	IVNT
	rs559623	chr18:57843875	C	A	Body mass index males	28892062	0.04355	7.42e-16	90992	IVNT
	rs2223621	chr6:20621238	T	C	Body mass index	28892062	-0.03145	7.1e-16	173430	IVNT
	rs12790913	chr11:27511998	A	G	Body mass index	25673413	0.0293	6.96e-16	320076	IVNT
	rs1516725	chr3:185824004	C	T	Body mass index adjusted for physical activity	28448500	0.0422	6.07e-16	199196	IVNT
	rs1516725	chr3:185824004	C	T	Body mass index adjusted for physical activity	28448500	0.0422	6.07e-16	199196	IVNT
	rs523288	chr18:57848369	T	A	Body mass index males	28892062	0.04694	5.95e-16	90992	IVNT
	rs12369179	chr12:122963550	C	T	Body mass index	UKBB	0.03379	5.84e-16	336107	IVNT
	rs10136360	chr14:79894046	A	G	Body mass index	UKBB	0.02361	4.59e-16	336107	IVNT
	rs73061095	chr3:185516807	G	T	Body mass index males	28892062	-0.04133	4.54e-16	90992	IVNT
	rs1225056	chr3:131638630	C	A	Body mass index	UKBB	-0.02227	3.45e-16	336107	IVNT
	rs1519480	chr11:27675712	C	T	Body mass index in non-smokers	28443625	0.0342	2.78e-16	164310	IVNT
	rs8050136	chr16:53816275	A	C	Body mass index in female smokers	28443625	0.0805	2.39e-16	23626	IVNT
	rs2307111	chr5:75003678	T	C	Body mass index	25673413	0.0242	1.87e-16	339004	IVNT
	rs2307111	chr5:75003678	T	C	Body mass index	25673413	0.0242	1.87e-16	339004	IVNT
	rs2307111	chr5:75003678	T	C	Body mass index	25673413	0.0242	1.87e-16	339004	IVNT
	rs1457489	chr18:57861961	A	G	Body mass index in males less than or equal to 50 years of age	26426971	0.062	1.7e-16	50088	IVNT
	rs523288	chr18:57848369	T	A	Body mass index in physically active females	28448500	0.0475	1.23e-16	89120	IVNT
	rs13416992	chr2:59298298	A	C	Body mass index	UKBB	0.0204	1.09e-16	336107	IVNT
	rs62136856	chr19:47573527	A	G	Body mass index	29273807	-0.019	9.9e-17	526508	IVNT
	rs2613505	chr1:72835410	T	C	Body mass index in males	25673413	0.0442	9.29e-17	152756	IVNT
	rs559623	chr18:57843875	C	A	Body mass index in non-smokers	28443625	0.0342	7.66e-17	147588	IVNT
	rs523288	chr18:57848369	T	A	Body mass index in female non-smokers	28443625	0.0446	7.56e-17	111363	IVNT
	rs147730268	chr12:123024476	G	T	Body mass index	UKBB	0.03611	7.38e-17	336107	IVNT
	rs12641981	chr4:45179883	C	T	Body mass index	20935630	NA	7.34e-17	123844	IVNT
	rs12641981	chr4:45179883	C	T	Body mass index	20935630	NA	7.34e-17	123865	-
	rs12641981	chr4:45179883	C	T	Body mass index	20935630	NA	7.34e-17	123844	IVNT
	rs12641981	chr4:45179883	C	T	Body mass index	20935630	NA	7.34e-17	123865	-
	rs12641981	chr4:45179883	C	T	Body mass index in non-smokers	28443625	-0.0335	7.31e-17	164213	IVNT
	rs12641981	chr4:45179883	C	T	Body mass index in non-smokers	28443625	-0.0335	7.31e-17	164213	IVNT
	rs769449	chr19:45410002	A	G	Body mass index	29273807	-0.027	6.4e-17	526508	IVNT
	rs2112347	chr5:75015242	G	T	Body mass index	25673413	-0.0261	6.19e-17	322019	IVNT
	rs2112347	chr5:75015242	G	T	Body mass index	25673413	-0.026	6e-17	-	kg/m2 increase
	rs163184	chr11:2847069	G	T	Body mass index	28892062	-0.03004	5.74e-17	173430	IVNT
	rs7575523	chr2:59335104	G	T	Body mass index	UKBB	-0.02072	4.03e-17	336107	IVNT
	rs1519480	chr11:27675712	C	T	Body mass index adjusted for smoking	28443625	0.029	3.53e-17	240566	IVNT
	rs11030107	chr11:27694835	A	G	Body mass index	25673413	-0.0297	3.15e-17	321630	IVNT
	rs7649058	chr3:131753688	C	T	Body mass index	UKBB	0.02181	2.9e-17	336107	IVNT
	rs2112653	chr5:74562564	T	C	Body mass index	UKBB	0.02067	2.71e-17	336107	IVNT
	rs980183	chr2:59311536	G	A	Body mass index	UKBB	0.02079	2.7e-17	336107	IVNT
	rs7645921	chr3:131761781	C	T	Body mass index	UKBB	-0.02191	2.31e-17	336107	IVNT
	rs2303108	chr19:47589895	C	T	Body mass index	29273807	0.019	2.2e-17	526508	IVNT
	rs181206	chr16:28513403	G	A	Body mass index	29273807	0.022	2e-17	449889	IVNT
	rs2112347	chr5:75015242	G	T	Body mass index	25673413	-0.0254	1.96e-17	339082	IVNT
	rs523288	chr18:57848369	T	A	Body mass index in physically active males	28448500	0.0596	1.89e-17	61540	IVNT
	rs6545714	chr2:59307725	A	G	Body mass index	UKBB	-0.02091	1.74e-17	336107	IVNT
	rs7132908	chr12:50263148	A	G	Body mass index	29273807	0.024	1.7e-17	449889	IVNT
	rs7132908	chr12:50263148	A	G	Body mass index	29273807	0.024	1.7e-17	449889	IVNT
	rs12916	chr5:74656539	C	T	Body mass index	UKBB	-0.02086	1.68e-17	336107	IVNT
	rs6739755	chr2:59330227	A	G	Body mass index	UKBB	0.02096	1.62e-17	336107	IVNT
	rs12924872	chr16:69552215	C	T	Body mass index	UKBB	0.02075	1.23e-17	336107	IVNT
	rs559623	chr18:57843875	C	A	Body mass index	25673413	0.0317	1.06e-17	233929	IVNT
	rs7141420	chr14:79899454	C	T	Body mass index	UKBB	-0.02081	7.74e-18	336107	IVNT
	rs559623	chr18:57843875	C	A	Body mass index adjusted for smoking	28443625	0.0333	5.22e-18	163874	IVNT
	rs73061095	chr3:185516807	G	T	Body mass index	28892062	-0.03247	4.82e-18	173430	IVNT
	rs2307111	chr5:75003678	T	C	Body mass index	29273807	0.022	4e-18	449889	IVNT
	rs2307111	chr5:75003678	T	C	Body mass index	29273807	0.022	4e-18	449889	IVNT
	rs2307111	chr5:75003678	T	C	Body mass index	29273807	0.022	4e-18	449889	IVNT
	rs9923544	chr16:53801985	C	T	Body mass index in male smokers	28443625	-0.088	3.64e-18	24496	IVNT
	rs181206	chr16:28513403	G	A	Body mass index	29273807	0.021	3.5e-18	526508	IVNT
	rs1457489	chr18:57861961	A	G	Body mass index in female non-smokers	28443625	0.045	3.49e-18	112006	IVNT
	rs523288	chr18:57848369	T	A	Body mass index in males less than or equal to 50 years of age	26426971	0.068	3e-18	48954	IVNT
	rs12641981	chr4:45179883	C	T	Body mass index in non-smokers	28443625	-0.0325	2.87e-18	190051	IVNT
	rs12641981	chr4:45179883	C	T	Body mass index in non-smokers	28443625	-0.0325	2.87e-18	190051	IVNT
	rs8050136	chr16:53816275	A	C	Body mass index in physically inactive males	28448500	0.0931	2.15e-18	20456	IVNT
	rs11030107	chr11:27694835	A	G	Body mass index	25673413	-0.0295	2.07e-18	338692	IVNT
	rs8050136	chr16:53816275	A	C	Body mass index in physically inactive individuals	28448500	0.0931	2e-18	-	unit increase
	rs181206	chr16:28513403	G	A	Body mass index	UKBB	0.02244	1.72e-18	336107	IVNT
	rs12641981	chr4:45179883	C	T	Body mass index in females less than or equal to 50 years of age	26426971	-0.054	1.7e-18	64368	IVNT
	rs12641981	chr4:45179883	C	T	Body mass index in females less than or equal to 50 years of age	26426971	-0.054	1.7e-18	64368	IVNT
	rs559623	chr18:57843875	C	A	Body mass index	25673413	0.0316	1.67e-18	236091	IVNT
	rs565108	chr10:99772190	T	C	Body mass index	UKBB	-0.02126	1.52e-18	336107	IVNT
	rs7766070	chr6:20686573	A	C	Body mass index males	28892062	-0.04396	1.35e-18	90992	IVNT
	rs563296	chr10:99772404	G	A	Body mass index	UKBB	-0.02131	1.35e-18	336107	IVNT
	rs1861410	chr2:58933591	T	C	Body mass index	UKBB	-0.02141	1.09e-18	336107	IVNT
	rs1861410	chr2:58933591	T	C	Body mass index	UKBB	-0.02141	1.09e-18	336107	IVNT
	rs7903146	chr10:114758349	C	T	Body mass index	28892062	-0.028	1e-18	-	kg/m
	rs7903146	chr10:114758349	C	T	Body mass index	28892062	-0.028	1e-18	-	kg/m
	rs7903146	chr10:114758349	C	T	Body mass index	28892062	-0.028	1e-18	-	kg/m
	rs7903146	chr10:114758349	C	T	Body mass index	28892062	-0.028	1e-18	-	kg/m
	rs7903146	chr10:114758349	C	T	Body mass index	28892062	-0.028	1e-18	-	kg/m
	rs1457489	chr18:57861961	A	G	Body mass index	20935630	NA	6.04e-19	123862	IVNT
	rs1457489	chr18:57861961	A	G	Body mass index	20935630	NA	6.04e-19	123865	-
	rs1519480	chr11:27675712	C	T	Body mass index adjusted for smoking	28443625	0.0325	5.88e-19	210190	IVNT
	rs163184	chr11:2847069	G	T	Body mass index males	28892062	-0.04362	3.14e-19	90992	IVNT
	rs10811661	chr9:22134094	C	T	Body mass index	28892062	0.03554	2.93e-19	173430	IVNT
	rs8050136	chr16:53816275	A	C	Body mass index in male smokers	28443625	0.0893	2.9e-19	24558	IVNT
	rs10811660	chr9:22134068	A	G	Body mass index	28892062	0.03557	2.69e-19	173430	IVNT
	rs12641981	chr4:45179883	C	T	Body mass index adjusted for physical activity	28448500	-0.0349	2.18e-19	176653	IVNT
	rs12641981	chr4:45179883	C	T	Body mass index adjusted for physical activity	28448500	-0.0349	2.18e-19	176653	IVNT
	rs12641981	chr4:45179883	C	T	Body mass index	23754948	-0.04212	1.74e-19	126555	IVNT
	rs12641981	chr4:45179883	C	T	Body mass index	23754948	-0.04212	1.74e-19	126555	IVNT
	rs1121980	chr16:53809247	G	A	Body mass index in male smokers	28443625	-0.089	1.72e-19	24668	IVNT
	rs769449	chr19:45410002	A	G	Body mass index	29273807	-0.031	9.9e-20	449889	IVNT
	rs559623	chr18:57843875	C	A	Body mass index adjusted for smoking	28443625	0.0335	7.75e-20	185888	IVNT
	rs10838782	chr11:47877800	A	G	Body mass index	UKBB	0.02198	7.73e-20	336107	IVNT
	rs1121980	chr16:53809247	G	A	Body mass index in physically inactive females	28448500	-0.0864	6.18e-20	26800	IVNT
	rs1457489	chr18:57861961	A	G	Body mass index in physically active males	28448500	0.0618	5.11e-20	61527	IVNT
	rs34811474	chr4:25408838	A	G	Body mass index	29273807	-0.024	4.4e-20	449889	IVNT
	rs4710938	chr6:20640904	A	G	Body mass index	28892062	-0.03369	4.11e-20	173430	IVNT
	rs4710938	chr6:20640904	A	G	Body mass index	28892062	-0.03369	4.11e-20	173430	IVNT
	rs4930011	chr11:2856658	C	G	Body mass index	28892062	0.03549	3.34e-20	173430	IVNT
	rs6499240	chr16:69686912	A	G	Body mass index	UKBB	-0.02257	3.1e-20	336107	IVNT
	rs6499240	chr16:69686912	A	G	Body mass index	UKBB	-0.02257	3.1e-20	336107	IVNT
	rs1412234	chr9:28410683	C	T	Body mass index	UKBB	0.02367	2.66e-20	336107	IVNT
	rs1412234	chr9:28410683	C	T	Body mass index	UKBB	0.02367	2.66e-20	336107	IVNT
	rs1457489	chr18:57861961	A	G	Body mass index in physically active females	28448500	0.0512	2.57e-20	89118	IVNT
	rs4889603	chr16:30982225	A	G	Body mass index	UKBB	0.02271	2.55e-20	336107	IVNT
	rs2307111	chr5:75003678	T	C	Body mass index	29273807	0.021	2.5e-20	526508	IVNT
	rs2307111	chr5:75003678	T	C	Body mass index	29273807	0.021	2.5e-20	526508	IVNT
	rs2307111	chr5:75003678	T	C	Body mass index	29273807	0.021	2.5e-20	526508	IVNT
	rs244418	chr16:69622762	A	G	Body mass index	UKBB	-0.02275	1.33e-20	336107	IVNT
	rs523288	chr18:57848369	T	A	Body mass index adjusted for smoking in females	28443625	0.0445	9.87e-21	136937	IVNT
	rs8050136	chr16:53816275	A	C	Body mass index in female non-smokers	28443625	0.0482	9.77e-21	91729	IVNT
	rs1519480	chr11:27675712	C	T	Body mass index	25673413	0.0306	9.58e-21	322119	IVNT
	rs8057044	chr16:53812614	A	G	Body mass index in females	23754948	0.058	9.5e-21	67875	IVNT
	rs12641981	chr4:45179883	C	T	Body mass index adjusted for physical activity	28448500	-0.0345	7.26e-21	196676	IVNT
	rs12641981	chr4:45179883	C	T	Body mass index adjusted for physical activity	28448500	-0.0345	7.26e-21	196676	IVNT
	rs10513801	chr3:185822353	G	T	Body mass index	UKBB	-0.03298	5.8e-21	336107	IVNT
	rs6931514	chr6:20703952	A	G	Body mass index	28892062	0.03344	5.5e-21	173430	IVNT
	rs523288	chr18:57848369	T	A	Body mass index ajusted for physical activity in females	28448500	0.0491	5.25e-21	115917	IVNT
	rs1516725	chr3:185824004	C	T	Body mass index	UKBB	0.03306	4.63e-21	336107	IVNT
	rs1516725	chr3:185824004	C	T	Body mass index	UKBB	0.03306	4.63e-21	336107	IVNT
	rs2613505	chr1:72835410	T	C	Body mass index	25673413	0.0379	3.67e-21	321915	IVNT
	rs13109272	chr4:103292422	C	T	Body mass index	UKBB	0.04318	3.18e-21	336107	IVNT
	rs1121980	chr16:53809247	G	A	Body mass index	19557197	NA	2.8e-21	31373	-
	rs12641981	chr4:45179883	C	T	Body mass index adjusted for smoking	28443625	-0.0335	1.93e-21	210013	IVNT
	rs12641981	chr4:45179883	C	T	Body mass index adjusted for smoking	28443625	-0.0335	1.93e-21	210013	IVNT
	rs7132908	chr12:50263148	A	G	Body mass index	29273807	0.024	1.9e-21	526508	IVNT
	rs7132908	chr12:50263148	A	G	Body mass index	29273807	0.024	1.9e-21	526508	IVNT
	rs9923544	chr16:53801985	C	T	Body mass index	19557197	NA	1.5e-21	31373	-
	rs7451008	chr6:20673880	C	T	Body mass index	28892062	-0.03444	1.34e-21	173430	IVNT
	rs34811474	chr4:25408838	A	G	Body mass index	29273807	-0.024	1.3e-21	526508	IVNT
	rs1457489	chr18:57861961	A	G	Body mass index	23754948	0.04803	1.08e-21	126573	IVNT
	rs10513801	chr3:185822353	G	T	Body mass index	25673413	-0.0448	1.07e-21	310358	IVNT
	rs4930011	chr11:2856658	C	G	Body mass index males	28892062	0.05021	8.59e-22	90992	IVNT
	rs8057044	chr16:53812614	A	G	Body mass index in physically inactive indivdiuals	28448500	0.0729	8.18e-22	41762	IVNT
	rs7196161	chr16:31110981	A	G	Body mass index	UKBB	0.02408	4.7e-22	336107	IVNT
	rs7196161	chr16:31110981	A	G	Body mass index	UKBB	0.02408	4.7e-22	336107	IVNT
	rs523288	chr18:57848369	T	A	Body mass index in females less than or equal to 50 years of age	26426971	0.068	4.7e-22	64473	IVNT
	rs523288	chr18:57848369	T	A	Body mass index	20935630	NA	4e-22	123864	IVNT
	rs523288	chr18:57848369	T	A	Body mass index	20935630	NA	4e-22	123865	-
	rs8057044	chr16:53812614	A	G	Body mass index in physically inactive indivdiuals	28448500	0.0705	3.12e-22	46338	IVNT
	rs2613505	chr1:72835410	T	C	Body mass index	25673413	0.0374	2.41e-22	338982	IVNT
	rs1516725	chr3:185824004	C	T	Body mass index	25673413	0.0451	1.89e-22	320644	IVNT
	rs1516725	chr3:185824004	C	T	Body mass index	25673413	0.0451	1.89e-22	320644	IVNT
	rs8101091	chr19:47600601	A	G	Body mass index	UKBB	-0.02608	1.6e-22	336107	IVNT
	rs12641981	chr4:45179883	C	T	Body mass index in males	25673413	-0.0404	1.5e-22	152362	IVNT
	rs12641981	chr4:45179883	C	T	Body mass index in males	25673413	-0.0404	1.5e-22	152362	IVNT
	rs1519480	chr11:27675712	C	T	Body mass index	25673413	0.0309	1.4e-22	339190	IVNT
	rs1457489	chr18:57861961	A	G	Body mass index in male non-smokers	28443625	0.058	1.32e-22	78054	IVNT
	rs12641981	chr4:45179883	C	T	Body mass index in females	25673413	-0.0398	1.26e-22	171451	IVNT
	rs12641981	chr4:45179883	C	T	Body mass index in females	25673413	-0.0398	1.26e-22	171451	IVNT
	rs2303108	chr19:47589895	C	T	Body mass index	UKBB	0.02622	8.53e-23	336107	IVNT
	rs9923544	chr16:53801985	C	T	Body mass index in female smokers	28443625	-0.0942	6.39e-23	26295	IVNT
	rs62136856	chr19:47573527	A	G	Body mass index	UKBB	-0.02628	6.14e-23	336107	IVNT
	rs1457489	chr18:57861961	A	G	Body mass index	28892062	0.04189	5.44e-23	173430	IVNT
	rs1121980	chr16:53809247	G	A	Body mass index in female smokers	28443625	-0.0919	4.44e-23	26361	IVNT
	rs8057044	chr16:53812614	A	G	Body mass index tails	23563607	0.25	4.2e-23	15931	log OR
	rs523288	chr18:57848369	T	A	Body mass index in male non-smokers	28443625	0.0609	3.76e-23	76815	IVNT
	rs8050136	chr16:53816275	A	C	Body mass index in physically inactive females	28448500	0.0952	3.76e-23	25773	IVNT
	rs8057044	chr16:53812614	A	G	Body mass index in physically active females	28448500	0.0499	3.16e-23	88548	IVNT
	rs2531995	chr16:4013467	T	C	Body mass index	UKBB	0.02464	2.76e-23	336107	IVNT
	rs1457489	chr18:57861961	A	G	Body mass index adjsuted for physical activity in males	28448500	0.0578	2.56e-23	84426	IVNT
	rs10513801	chr3:185822353	G	T	Body mass index	25673413	-0.0448	1.94e-23	327289	IVNT
	rs17309930	chr11:27748493	A	C	Body mass index	UKBB	0.02954	1.89e-23	336107	IVNT
	rs1549293	chr16:31141993	T	C	Body mass index	UKBB	-0.02509	1.63e-23	336107	IVNT
	rs12641981	chr4:45179883	C	T	Body mass index	29273807	-0.034	1.3e-23	449889	IVNT
	rs12641981	chr4:45179883	C	T	Body mass index	29273807	-0.034	1.3e-23	449889	IVNT
	rs2613505	chr1:72835410	T	C	Body mass index	UKBB	0.03023	1.11e-23	336107	IVNT
	rs8050136	chr16:53816275	A	C	Body mass index	19557197	NA	1e-23	31373	-
	rs12641981	chr4:45179883	C	T	Body mass index adjusted for smoking	28443625	-0.033	9.79e-24	240382	IVNT
	rs12641981	chr4:45179883	C	T	Body mass index adjusted for smoking	28443625	-0.033	9.79e-24	240382	IVNT
	rs8057044	chr16:53812614	A	G	Body mass index in physically active males	28448500	0.0605	8.7e-24	61137	IVNT
	rs559623	chr18:57843875	C	A	Body mass index	UKBB	0.02438	6.65e-24	336107	IVNT
	rs2613504	chr1:72835740	G	A	Body mass index	UKBB	-0.03045	5.75e-24	336107	IVNT
	rs1457489	chr18:57861961	A	G	Body mass index adjusted for smoking in females	28443625	0.0465	5.72e-24	137769	IVNT
	rs2613496	chr1:72754788	T	C	Body mass index	UKBB	-0.0309	3.41e-24	336107	IVNT
	rs2613496	chr1:72754788	T	C	Body mass index	UKBB	-0.0309	3.41e-24	336107	IVNT
	rs1457489	chr18:57861961	A	G	Body mass index ajusted for physical activity in females	28448500	0.0511	2.68e-24	115906	IVNT
	rs9923544	chr16:53801985	C	T	Body mass index in physically inactive females	28448500	-0.0973	2.4e-24	26641	IVNT
	rs523288	chr18:57848369	T	A	Body mass index adjsuted for physical activity in males	28448500	0.0612	1.45e-24	84450	IVNT
	rs1516725	chr3:185824004	C	T	Body mass index	25673413	0.0448	1.39e-24	337708	IVNT
	rs1516725	chr3:185824004	C	T	Body mass index	25673413	0.0448	1.39e-24	337708	IVNT
	rs523288	chr18:57848369	T	A	Body mass index	23754948	0.054	1.1e-24	126575	IVNT
	rs1516725	chr3:185824004	C	T	Body mass index	28892062	0.045	1e-24	-	kg/m
	rs1516725	chr3:185824004	C	T	Body mass index	28892062	0.045	1e-24	-	kg/m
	rs2237895	chr11:2857194	A	C	Body mass index	28892062	0.03801	7.94e-25	173430	IVNT
	rs1457489	chr18:57861961	A	G	Body mass index in males	25673413	0.0475	6.02e-25	152569	IVNT
	rs8057044	chr16:53812614	A	G	Body mass index females	28892062	0.06562	1.83e-25	82438	IVNT
	rs12641981	chr4:45179883	C	T	Body mass index	29273807	-0.034	8.8e-26	526508	IVNT
	rs12641981	chr4:45179883	C	T	Body mass index	29273807	-0.034	8.8e-26	526508	IVNT
	rs559623	chr18:57843875	C	A	Body mass index	28892062	0.04181	8.34e-26	173430	IVNT
	rs1457489	chr18:57861961	A	G	Body mass index in females less than or equal to 50 years of age	26426971	0.07	6e-26	65190	IVNT
	rs2112347	chr5:75015242	G	T	Body mass index	29273807	-0.025	5.5e-26	449889	IVNT
	rs12577586	chr11:27600435	C	T	Body mass index	UKBB	0.03011	2.73e-26	336107	IVNT
	rs12790913	chr11:27511998	A	G	Body mass index	UKBB	0.02993	2.5e-26	336107	IVNT
	rs8057044	chr16:53812614	A	G	Body mass index in smokers	28443625	0.0729	1.83e-26	50616	IVNT
	rs2237895	chr11:2857194	A	C	Body mass index males	28892062	0.05348	1.56e-26	90992	IVNT
	rs2112347	chr5:75015242	G	T	Body mass index	28892062	0.025	8e-27	-	kg/m
	rs1121980	chr16:53809247	G	A	Body mass index females	28892062	-0.06688	7.65e-27	82438	IVNT
	rs523288	chr18:57848369	T	A	Body mass index adjusted for smoking in males	28443625	0.0584	7.6e-27	100932	IVNT
	rs9923544	chr16:53801985	C	T	Body mass index females	28892062	-0.06688	7.59e-27	82438	IVNT
	rs34811474	chr4:25408838	A	G	Body mass index	UKBB	-0.0306	5.3e-27	336107	IVNT
	rs11861132	chr16:28871860	A	G	Body mass index	UKBB	-0.02636	4.95e-27	336107	IVNT
	rs2263329	chr6:34595543	C	T	Body mass index	UKBB	0.02702	4.84e-27	336107	IVNT
	rs523288	chr18:57848369	T	A	Body mass index in males	25673413	0.0528	3.09e-27	146036	IVNT
	rs9469899	chr6:34793124	A	G	Body mass index	UKBB	0.02717	2.48e-27	336107	IVNT
	rs8057044	chr16:53812614	A	G	Body mass index in smokers	28443625	0.0781	2.47e-27	45526	IVNT
	rs35225200	chr4:103146888	A	C	Body mass index	UKBB	-0.04881	1.48e-27	336107	IVNT
	rs523288	chr18:57848369	T	A	Body mass index	28892062	0.04658	1.1e-27	173430	IVNT
	rs2744944	chr6:34658080	C	A	Body mass index	UKBB	-0.02732	1.08e-27	336107	IVNT
	rs7766070	chr6:20686573	A	C	Body mass index	28892062	-0.04042	5.36e-28	173430	IVNT
	rs1457489	chr18:57861961	A	G	Body mass index adjusted for smoking in males	28443625	0.0572	5.1e-28	102703	IVNT
	rs2112347	chr5:75015242	G	T	Body mass index	29273807	-0.023	2.6e-28	526508	IVNT
	rs8057044	chr16:53812614	A	G	Body mass index in female non-smokers	28443625	0.052	6.8e-29	111116	IVNT
	rs2112347	chr5:75015242	G	T	Body mass index	UKBB	-0.02819	2.78e-29	336107	IVNT
	rs8057044	chr16:53812614	A	G	Body mass index in male non-smokers	28443625	0.0599	1.45e-29	77734	IVNT
	rs1121980	chr16:53809247	G	A	Body mass index in physically inactive indivdiuals	28448500	-0.0831	1.14e-29	46339	IVNT
	rs8057044	chr16:53812614	A	G	Body mass index in males	23754948	0.072	1.13e-29	58556	IVNT
	rs523288	chr18:57848369	T	A	Body mass index in physically active indivdiuals	28448500	0.0521	9.12e-30	150140	IVNT
	rs12367809	chr12:50256063	C	T	Body mass index	UKBB	-0.02857	3.13e-30	336107	IVNT
	rs13107325	chr4:103188709	T	C	Body mass index	UKBB	0.0523	2.66e-30	336107	IVNT
	rs13107325	chr4:103188709	T	C	Body mass index	UKBB	0.0523	2.66e-30	336107	IVNT
	rs13107325	chr4:103188709	T	C	Body mass index	UKBB	0.0523	2.66e-30	336107	IVNT
	rs13107325	chr4:103188709	T	C	Body mass index	UKBB	0.0523	2.66e-30	336107	IVNT
	rs13107325	chr4:103188709	T	C	Body mass index	UKBB	0.0523	2.66e-30	336107	IVNT
	rs13107325	chr4:103188709	T	C	Body mass index	UKBB	0.0523	2.66e-30	336107	IVNT
	rs1121980	chr16:53809247	G	A	Body mass index tails	23563607	-0.3	2.5e-30	15753	log OR
	rs8050136	chr16:53816275	A	C	Body mass index tails	23563607	0.29	1.4e-30	15737	log OR
	rs7132908	chr12:50263148	A	G	Body mass index	UKBB	0.02853	8.27e-31	336107	IVNT
	rs7132908	chr12:50263148	A	G	Body mass index	UKBB	0.02853	8.27e-31	336107	IVNT
	rs1121980	chr16:53809247	G	A	Body mass index in physically inactive indivdiuals	28448500	-0.0888	7.28e-31	42012	IVNT
	rs9923544	chr16:53801985	C	T	Body mass index in physically active males	28448500	-0.07	6.57e-31	61128	IVNT
	rs11030107	chr11:27694835	A	G	Body mass index	UKBB	-0.03168	2.85e-31	336107	IVNT
	rs7903146	chr10:114758349	C	T	Body mass index	29273807	0.029	1.9e-31	449889	IVNT
	rs7903146	chr10:114758349	C	T	Body mass index	29273807	0.029	1.9e-31	449889	IVNT
	rs7903146	chr10:114758349	C	T	Body mass index	29273807	0.029	1.9e-31	449889	IVNT
	rs7903146	chr10:114758349	C	T	Body mass index	29273807	0.029	1.9e-31	449889	IVNT
	rs7903146	chr10:114758349	C	T	Body mass index	29273807	0.029	1.9e-31	449889	IVNT
	rs523288	chr18:57848369	T	A	Body mass index in physically active indivdiuals	28448500	0.0574	9.17e-32	138158	IVNT
	rs1457489	chr18:57861961	A	G	Body mass index in non-smokers	28443625	0.0518	8.21e-32	164231	IVNT
	rs2307111	chr5:75003678	T	C	Body mass index	UKBB	0.02895	6.35e-32	336107	IVNT
	rs2307111	chr5:75003678	T	C	Body mass index	UKBB	0.02895	6.35e-32	336107	IVNT
	rs2307111	chr5:75003678	T	C	Body mass index	UKBB	0.02895	6.35e-32	336107	IVNT
	rs8050136	chr16:53816275	A	C	Body mass index in females	23754948	0.072	6.12e-32	67896	IVNT
	rs1519480	chr11:27675712	C	T	Body mass index	UKBB	0.03019	5.27e-32	336107	IVNT
	rs523288	chr18:57848369	T	A	Body mass index in non-smokers	28443625	0.0547	5.25e-32	162346	IVNT
	rs17066842	chr18:58040624	A	G	Body mass index	UKBB	-0.07355	3.84e-32	336107	IVNT
	rs1121980	chr16:53809247	G	A	Body mass index in females	23754948	-0.074	3.42e-32	67946	IVNT
	rs62033400	chr16:53811788	A	G	Body mass index females	28892062	-0.07736	2.68e-32	82438	IVNT
	rs62033400	chr16:53811788	A	G	Body mass index females	28892062	-0.07736	2.68e-32	82438	IVNT
	rs8050136	chr16:53816275	A	C	Body mass index in smokers	28443625	0.0838	2.43e-32	48184	IVNT
	rs3814883	chr16:29994922	T	C	Body mass index	UKBB	0.02857	2.22e-32	336107	IVNT
	rs3814883	chr16:29994922	T	C	Body mass index	UKBB	0.02857	2.22e-32	336107	IVNT
	rs3814883	chr16:29994922	T	C	Body mass index	UKBB	0.02857	2.22e-32	336107	IVNT
	rs9923544	chr16:53801985	C	T	Body mass index tails	23563607	-0.31	1.9e-32	15749	log OR
	rs8050136	chr16:53816275	A	C	Body mass index females	28892062	0.0775	1.7e-32	82438	IVNT
	rs12641981	chr4:45179883	C	T	Body mass index	UKBB	-0.02885	1.48e-32	336107	IVNT
	rs12641981	chr4:45179883	C	T	Body mass index	UKBB	-0.02885	1.48e-32	336107	IVNT
	rs9923544	chr16:53801985	C	T	Body mass index in females	23754948	-0.075	1.09e-32	67945	IVNT
	rs8050136	chr16:53816275	A	C	Body mass index adjusted for smoking in females	28443625	0.0546	8.92e-33	112782	IVNT
	rs1121980	chr16:53809247	G	A	Body mass index in physically active males	28448500	-0.0714	6.93e-33	61526	IVNT
	rs7613875	chr3:49971514	A	C	Body mass index	UKBB	0.02886	6.9e-33	336107	IVNT
	rs1457489	chr18:57861961	A	G	Body mass index in females	25673413	0.0535	5.36e-33	171668	IVNT
	rs10767659	chr11:27686196	G	T	Body mass index	UKBB	0.03057	4.22e-33	336107	IVNT
	rs56094641	chr16:53806453	A	G	Body mass index females	28892062	-0.07878	2.11e-33	82438	IVNT
	rs8050136	chr16:53816275	A	C	Body mass index in smokers	28443625	0.0904	1.89e-33	43114	IVNT
	rs4402589	chr16:29954654	T	G	Body mass index	UKBB	-0.02915	1.68e-33	336107	IVNT
	rs8057044	chr16:53812614	A	G	Body mass index in females less than or equal to 50 years of age	26426971	0.071	1.1e-33	65050	IVNT
	rs523288	chr18:57848369	T	A	Body mass index in females	25673413	0.0565	1.01e-33	169724	IVNT
	rs1121980	chr16:53809247	G	A	Body mass index	18454148	NA	5.08e-34	16876	-
	rs8057044	chr16:53812614	A	G	Body mass index ajusted for physical activity in females	28448500	0.0554	1.7e-34	115161	IVNT
	rs1457489	chr18:57861961	A	G	Body mass index in physically active indivdiuals	28448500	0.0578	1.39e-34	138143	IVNT
	rs523288	chr18:57848369	T	A	Body mass index in non-smokers	28443625	0.0511	1.24e-34	188178	IVNT
	rs8057044	chr16:53812614	A	G	Body mass index adjsuted for physical activity in males	28448500	0.0631	1.14e-34	83946	IVNT
	rs8057044	chr16:53812614	A	G	Body mass index males	28892062	0.07063	9.45e-35	90992	IVNT
	rs13107325	chr4:103188709	T	C	Body mass index	29273807	0.053	9.1e-35	526508	IVNT
	rs13107325	chr4:103188709	T	C	Body mass index	29273807	0.053	9.1e-35	526508	IVNT
	rs13107325	chr4:103188709	T	C	Body mass index	29273807	0.053	9.1e-35	526508	IVNT
	rs13107325	chr4:103188709	T	C	Body mass index	29273807	0.053	9.1e-35	526508	IVNT
	rs13107325	chr4:103188709	T	C	Body mass index	29273807	0.053	9.1e-35	526508	IVNT
	rs13107325	chr4:103188709	T	C	Body mass index	29273807	0.053	9.1e-35	526508	IVNT
	rs8050136	chr16:53816275	A	C	Body mass index in physically active females	28448500	0.0616	6.37e-35	88735	IVNT
	rs9923544	chr16:53801985	C	T	Body mass index in physically inactive indivdiuals	28448500	-0.0906	6.34e-35	46337	IVNT
	rs9923544	chr16:53801985	C	T	Body mass index in physically inactive indivdiuals	28448500	-0.0953	5.24e-35	41754	IVNT
	rs1121980	chr16:53809247	G	A	Body mass index males	28892062	-0.0704	3.72e-35	90992	IVNT
	rs9923544	chr16:53801985	C	T	Body mass index males	28892062	-0.07045	3.33e-35	90992	IVNT
	rs13107325	chr4:103188709	T	C	Body mass index	29273807	0.055	2.8e-35	449889	IVNT
	rs13107325	chr4:103188709	T	C	Body mass index	29273807	0.055	2.8e-35	449889	IVNT
	rs13107325	chr4:103188709	T	C	Body mass index	29273807	0.055	2.8e-35	449889	IVNT
	rs13107325	chr4:103188709	T	C	Body mass index	29273807	0.055	2.8e-35	449889	IVNT
	rs13107325	chr4:103188709	T	C	Body mass index	29273807	0.055	2.8e-35	449889	IVNT
	rs13107325	chr4:103188709	T	C	Body mass index	29273807	0.055	2.8e-35	449889	IVNT
	rs1457489	chr18:57861961	A	G	Body mass index in physically active indivdiuals	28448500	0.0551	2.8e-35	150125	IVNT
	rs8057044	chr16:53812614	A	G	Body mass index in males greater than 50 years of age	26426971	0.062	1.2e-35	90722	IVNT
	rs1121980	chr16:53809247	G	A	Body mass index in female non-smokers	28443625	-0.0586	8.23e-36	111913	IVNT
	rs1457489	chr18:57861961	A	G	Body mass index in non-smokers	28443625	0.0501	7.87e-36	190060	IVNT
	rs7634917	chr3:50049299	G	T	Body mass index	UKBB	-0.03014	5.19e-36	336107	IVNT
	rs9923544	chr16:53801985	C	T	Body mass index in female non-smokers	28443625	-0.0599	4.37e-36	111809	IVNT
	rs9923544	chr16:53801985	C	T	Body mass index in males	23754948	-0.082	2.9e-36	58610	IVNT
	rs6792892	chr3:49995518	C	T	Body mass index	UKBB	0.03037	1.53e-36	336107	IVNT
	rs8057044	chr16:53812614	A	G	Body mass index in males less than or equal to 50 years of age	26426971	0.084	8.9e-37	49931	IVNT
	rs1121980	chr16:53809247	G	A	Body mass index in physically active females	28448500	-0.0639	8.45e-37	89111	IVNT
	rs1121980	chr16:53809247	G	A	Body mass index in males	23754948	-0.081	6.39e-37	58609	IVNT
	rs8050136	chr16:53816275	A	C	Body mass index in physically inactive indivdiuals	28448500	0.0964	4.28e-37	43730	IVNT
	rs8057044	chr16:53812614	A	G	Body mass index adjusted for smoking in females	28443625	0.0548	3.03e-37	134837	IVNT
	rs9923544	chr16:53801985	C	T	Body mass index in smokers	28443625	-0.0905	1.89e-37	50791	IVNT
	rs8050136	chr16:53816275	A	C	Body mass index in physically inactive indivdiuals	28448500	0.1018	1.11e-37	39402	IVNT
	rs12641981	chr4:45179883	C	T	Body mass index	25673413	-0.0399	9.81e-38	321103	IVNT
	rs12641981	chr4:45179883	C	T	Body mass index	25673413	-0.0399	9.81e-38	321103	IVNT
	rs1121980	chr16:53809247	G	A	Body mass index in smokers	28443625	-0.0943	2.63e-38	45907	IVNT
	rs9923544	chr16:53801985	C	T	Body mass index in smokers	28443625	-0.0968	2.37e-38	45669	IVNT
	rs1121980	chr16:53809247	G	A	Body mass index in smokers	28443625	-0.0898	9.8e-39	51029	IVNT
	rs9923544	chr16:53801985	C	T	Body mass index in physically active females	28448500	-0.0662	6.76e-39	88560	IVNT
	rs8050136	chr16:53816275	A	C	Body mass index in physically active individuals	28448500	0.0792	4e-39	-	kg/m
	rs8050136	chr16:53816275	A	C	Body mass index in males	23754948	0.084	7.51e-40	58536	IVNT
	rs76227980	chr18:58036384	C	T	Body mass index	UKBB	0.1132	2.64e-40	336107	IVNT
	rs2229616	chr18:58039276	T	C	Body mass index	UKBB	-0.1138	2.03e-40	336107	IVNT
	rs75241338	chr18:58074773	A	G	Body mass index	UKBB	-0.1139	1.54e-40	336107	IVNT
	rs75241338	chr18:58074773	A	G	Body mass index	UKBB	-0.1139	1.54e-40	336107	IVNT
	rs523288	chr18:57848369	T	A	Body mass index adjusted for smoking	28443625	0.0543	1.3e-40	207504	IVNT
	rs12641981	chr4:45179883	C	T	Body mass index	25673413	-0.0398	8.65e-41	338172	IVNT
	rs12641981	chr4:45179883	C	T	Body mass index	25673413	-0.0398	8.65e-41	338172	IVNT
	rs8057044	chr16:53812614	A	G	Body mass index	20935630	NA	7.15e-41	123720	IVNT
	rs8057044	chr16:53812614	A	G	Body mass index	20935630	NA	7.15e-41	123865	-
	rs523288	chr18:57848369	T	A	Body mass index adjusted for smoking	28443625	0.0502	5.37e-41	237868	IVNT
	rs62033400	chr16:53811788	A	G	Body mass index males	28892062	-0.08002	5.17e-41	90992	IVNT
	rs62033400	chr16:53811788	A	G	Body mass index males	28892062	-0.08002	5.17e-41	90992	IVNT
	rs8050136	chr16:53816275	A	C	Body mass index males	28892062	0.07999	4.33e-41	90992	IVNT
	rs56094641	chr16:53806453	A	G	Body mass index males	28892062	-0.08017	3.72e-41	90992	IVNT
	rs9923544	chr16:53801985	C	T	Body mass index in male non-smokers	28443625	-0.0724	2.29e-41	77761	IVNT
	rs7903146	chr10:114758349	C	T	Body mass index	29273807	0.031	2.2e-42	526508	IVNT
	rs7903146	chr10:114758349	C	T	Body mass index	29273807	0.031	2.2e-42	526508	IVNT
	rs7903146	chr10:114758349	C	T	Body mass index	29273807	0.031	2.2e-42	526508	IVNT
	rs7903146	chr10:114758349	C	T	Body mass index	29273807	0.031	2.2e-42	526508	IVNT
	rs7903146	chr10:114758349	C	T	Body mass index	29273807	0.031	2.2e-42	526508	IVNT
	rs1121980	chr16:53809247	G	A	Body mass index in male non-smokers	28443625	-0.0722	2.08e-42	78063	IVNT
	rs1457489	chr18:57861961	A	G	Body mass index adjusted for smoking	28443625	0.0526	8.56e-43	210116	IVNT
	rs8050136	chr16:53816275	A	C	Body mass index in females less than or equal to 50 years of age	26426971	0.082	8.3e-43	63840	IVNT
	rs8057044	chr16:53812614	A	G	Body mass index adjusted for smoking in males	28443625	0.064	7.26e-43	102192	IVNT
	rs73455626	chr18:57942192	A	C	Body mass index	UKBB	-0.03619	2.1e-43	336107	IVNT
	rs9923544	chr16:53801985	C	T	Body mass index in females less than or equal to 50 years of age	26426971	-0.086	5.9e-44	65129	IVNT
	rs8050136	chr16:53816275	A	C	Body mass index in males less than or equal to 50 years of age	26426971	0.097	3.1e-44	46604	IVNT
	rs9923544	chr16:53801985	C	T	Body mass index in males less than or equal to 50 years of age	26426971	-0.096	2.4e-44	49952	IVNT
	rs8050136	chr16:53816275	A	C	Body mass index in male non-smokers	28443625	0.0753	1.54e-44	77763	IVNT
	rs8057044	chr16:53812614	A	G	Body mass index in females greater than 50 years of age	26426971	0.066	4.3e-45	104848	IVNT
	rs8050136	chr16:53816275	A	C	Body mass index in males greater than 50 years of age	26426971	0.07	3.3e-45	90762	IVNT
	rs1121980	chr16:53809247	G	A	Body mass index in females less than or equal to 50 years of age	26426971	-0.086	1.3e-46	65179	IVNT
	rs1121980	chr16:53809247	G	A	Body mass index in males less than or equal to 50 years of age	26426971	-0.097	7.4e-47	49881	IVNT
	rs9923544	chr16:53801985	C	T	Body mass index in males greater than 50 years of age	26426971	-0.072	1.4e-47	91832	IVNT
	rs1457489	chr18:57861961	A	G	Body mass index adjusted for smoking	28443625	0.0509	1.33e-47	240473	IVNT
	rs8050136	chr16:53816275	A	C	Body mass index	19079260	NA	1.1e-47	34416	-
	rs8050136	chr16:53816275	A	C	Body mass index	19079260	8.04	1e-47	-	% SD
	rs8050136	chr16:53816275	A	C	Body mass index	19079260	NA	1e-47	-	-
	rs8057044	chr16:53812614	A	G	Body mass index	23754948	0.06478	6.13e-48	126431	IVNT
	rs1121980	chr16:53809247	G	A	Body mass index in males greater than 50 years of age	26426971	-0.071	4.1e-48	91406	IVNT
	rs1457489	chr18:57861961	A	G	Body mass index	25673413	0.0508	7.74e-49	321527	IVNT
	rs8057044	chr16:53812614	A	G	Body mass index in non-smokers	28443625	0.0548	1.96e-49	188851	IVNT
	rs8057044	chr16:53812614	A	G	Body mass index in non-smokers	28443625	0.0589	4.47e-50	163033	IVNT
	rs523288	chr18:57848369	T	A	Body mass index	25673413	0.0549	2.55e-50	313049	IVNT
	rs1121980	chr16:53809247	G	A	Body mass index adjusted for smoking in females	28443625	-0.0626	8.93e-51	137740	IVNT
	rs9923544	chr16:53801985	C	T	Body mass index adjusted for smoking in females	28443625	-0.0657	9.51e-52	135464	IVNT
	rs1457489	chr18:57861961	A	G	Body mass index	25673413	0.0506	3.99e-52	338575	IVNT
	rs523288	chr18:57848369	T	A	Body mass index	25673413	0.054	2.92e-52	326493	IVNT
	rs8050136	chr16:53816275	A	C	Body mass index in females greater than 50 years of age	26426971	0.073	6.9e-53	103148	IVNT
	rs8050136	chr16:53816275	A	C	Body mass index joint analysis main effects and physical activity interaction	28448500	NA	4e-54	-	-
	rs8050136	chr16:53816275	A	C	Body mass index in non-smokers	28443625	0.0605	6.29e-56	169492	IVNT
	rs68033110	chr18:57914679	A	G	Body mass index	UKBB	0.04459	5.43e-56	336107	IVNT
	rs1121980	chr16:53809247	G	A	Body mass index in females greater than 50 years of age	26426971	-0.076	5.4e-56	104069	IVNT
	rs12992672	chr2:632592	A	G	Body mass index	UKBB	0.05078	2.7e-57	336107	IVNT
	rs1121980	chr16:53809247	G	A	Body mass index	20935630	NA	1.78e-57	123845	IVNT
	rs1121980	chr16:53809247	G	A	Body mass index	20935630	NA	1.78e-57	123865	-
	rs8050136	chr16:53816275	A	C	Body mass index in non-smokers	28443625	0.067	1.58e-57	143649	IVNT
	rs8057044	chr16:53812614	A	G	Body mass index	28892062	0.06783	1.51e-57	173430	IVNT
	rs9923544	chr16:53801985	C	T	Body mass index	20935630	NA	1.08e-57	123845	IVNT
	rs9923544	chr16:53801985	C	T	Body mass index	20935630	NA	1.08e-57	123865	-
	rs9923544	chr16:53801985	C	T	Body mass index adjusted for smoking in males	28443625	-0.076	1.02e-57	102232	IVNT
	rs9923544	chr16:53801985	C	T	Body mass index in females greater than 50 years of age	26426971	-0.077	3.6e-58	104849	IVNT
	rs8050136	chr16:53816275	A	C	Body mass index	28448500	0.0844	2e-58	-	kg/m
	rs1121980	chr16:53809247	G	A	Body mass index	28892062	-0.06838	1.63e-59	173430	IVNT
	rs9923544	chr16:53801985	C	T	Body mass index	28892062	-0.0684	1.5e-59	173430	IVNT
	rs8050136	chr16:53816275	A	C	Body mass index	20935630	NA	1.04e-59	123729	IVNT
	rs8050136	chr16:53816275	A	C	Body mass index	20935630	NA	1.04e-59	123865	-
	rs1121980	chr16:53809247	G	A	Body mass index adjusted for smoking in males	28443625	-0.0758	9.74e-60	102705	IVNT
	rs8057044	chr16:53812614	A	G	Body mass index in females	25673413	0.0647	9.1e-61	171353	IVNT
	rs8050136	chr16:53816275	A	C	Body mass index adjusted for smoking in males	28443625	0.0771	1.53e-61	102270	IVNT
	rs11665439	chr18:57889651	A	G	Body mass index	UKBB	-0.04589	6.52e-64	336107	IVNT
	rs8057044	chr16:53812614	A	G	Body mass index in males	25673413	0.0694	1.21e-65	152334	IVNT
	rs1121980	chr16:53809247	G	A	Body mass index	23754948	-0.07744	1.13e-66	126556	IVNT
	rs1457489	chr18:57861961	A	G	Body mass index	UKBB	0.04685	8.62e-67	336107	IVNT
	rs9923544	chr16:53801985	C	T	Body mass index	23754948	-0.07839	2.87e-67	126556	IVNT
	rs1121980	chr16:53809247	G	A	Body mass index in non-smokers	28443625	-0.064	1.41e-67	189976	IVNT
	rs8050136	chr16:53816275	A	C	Body mass index	23754948	0.07781	2.29e-68	126432	IVNT
	rs9923544	chr16:53801985	C	T	Body mass index in non-smokers	28443625	-0.0651	1.28e-69	189571	IVNT
	rs9923544	chr16:53801985	C	T	Body mass index in non-smokers	28443625	-0.0715	7.51e-70	163728	IVNT
	rs62033400	chr16:53811788	A	G	Body mass index	28892062	-0.07835	1.07e-70	173430	IVNT
	rs62033400	chr16:53811788	A	G	Body mass index	28892062	-0.07835	1.07e-70	173430	IVNT
	rs8050136	chr16:53816275	A	C	Body mass index	28892062	0.07842	5.07e-71	173430	IVNT
	rs56094641	chr16:53806453	A	G	Body mass index	28892062	-0.07912	5.06e-72	173430	IVNT
	rs1121980	chr16:53809247	G	A	Body mass index in non-smokers	28443625	-0.0718	3.16e-73	164134	IVNT
	rs523288	chr18:57848369	T	A	Body mass index	UKBB	0.05173	1.09e-74	336107	IVNT
	rs8057044	chr16:53812614	A	G	Body mass index adjusted for smoking	28443625	0.0632	1.17e-75	206691	IVNT
	rs8057044	chr16:53812614	A	G	Body mass index adjusted for smoking	28443625	0.0591	1.3e-76	237030	IVNT
	rs9923544	chr16:53801985	C	T	Body mass index in females	25673413	-0.0772	6.03e-81	171448	IVNT
	rs8050136	chr16:53816275	A	C	Body mass index in females	25673413	0.0753	5.29e-81	171874	IVNT
	rs8050136	chr16:53816275	A	C	Body mass index adjusted for smoking	28443625	0.0652	4.91e-81	215052	IVNT
	rs9923544	chr16:53801985	C	T	Body mass index in males	25673413	-0.0805	1.53e-84	152375	IVNT
	rs8050136	chr16:53816275	A	C	Body mass index adjusted for smoking	28443625	0.0716	2e-85	184677	IVNT
	rs1121980	chr16:53809247	G	A	Body mass index in females	25673413	-0.0774	4.87e-86	171524	IVNT
	rs8050136	chr16:53816275	A	C	Body mass index in males	25673413	0.0807	3.87e-86	152759	IVNT
	rs1121980	chr16:53809247	G	A	Body mass index in males	25673413	-0.0804	2.2e-86	152442	IVNT
	rs1121980	chr16:53809247	G	A	Body mass index adjusted for smoking	28443625	-0.0687	6.25e-104	240445	IVNT
	rs9923544	chr16:53801985	C	T	Body mass index adjusted for smoking	28443625	-0.0707	2.29e-104	237696	IVNT
	rs9923544	chr16:53801985	C	T	Body mass index adjusted for smoking	28443625	-0.0771	5.78e-106	207320	IVNT
	rs1121980	chr16:53809247	G	A	Body mass index adjusted for smoking	28443625	-0.0753	3.51e-106	210070	IVNT
	rs8057044	chr16:53812614	A	G	Body mass index	25673413	0.067	4.56e-108	320976	IVNT
	rs8057044	chr16:53812614	A	G	Body mass index	25673413	0.065	8.28e-110	338044	IVNT
	rs8057044	chr16:53812614	A	G	Body mass index	UKBB	0.05751	3.66e-126	336107	IVNT
	rs1121980	chr16:53809247	G	A	Body mass index	25673413	-0.079	1.8e-142	321255	IVNT
	rs9923544	chr16:53801985	C	T	Body mass index	25673413	-0.079	1.79e-142	321112	IVNT
	rs1121980	chr16:53809247	G	A	Body mass index	25673413	-0.0756	1.49e-142	338325	IVNT
	rs9923544	chr16:53801985	C	T	Body mass index	25673413	-0.0757	8.15e-143	338183	IVNT
	rs8050136	chr16:53816275	A	C	Body mass index	25673413	0.078	4.42e-144	321930	IVNT
	rs8050136	chr16:53816275	A	C	Body mass index	25673413	0.075	1.95e-145	339002	IVNT
	rs1121980	chr16:53809247	G	A	Body mass index	UKBB	-0.06827	1.82e-173	336107	IVNT
	rs9923544	chr16:53801985	C	T	Body mass index	UKBB	-0.06848	1.79e-174	336107	IVNT
	rs8050136	chr16:53816275	A	C	Body mass index	UKBB	0.07009	7.01e-179	336107	IVNT
	rs62033400	chr16:53811788	A	G	Body mass index	UKBB	-0.07054	4.45e-181	336107	IVNT
	rs62033400	chr16:53811788	A	G	Body mass index	UKBB	-0.07054	4.45e-181	336107	IVNT
	rs56094641	chr16:53806453	A	G	Body mass index	UKBB	-0.07229	1.26e-191	336107	IVNT
	rs1121980	chr16:53809247	G	A	Body mass index	29273807	-0.075	6.7e-225	449889	IVNT
	rs1121980	chr16:53809247	G	A	Body mass index	29273807	-0.069	4.2e-228	526508	IVNT
	rs8050136	chr16:53816275	A	C	Body mass index	29273807	0.076	1.3e-229	449889	IVNT
	rs8050136	chr16:53816275	A	C	Body mass index	29273807	0.071	5.2e-235	526508	IVNT
	rs9923544	chr16:53801985	C	T	Body mass index adjusted for physical activity	28448500	-0.0777	0	179079	IVNT
	rs1121980	chr16:53809247	G	A	Body mass index adjusted for physical activity	28448500	-0.076	0	180286	IVNT
	rs1121980	chr16:53809247	G	A	Body mass index adjsuted for physical activity in males	28448500	-0.0753	0	84428	IVNT
	rs9923544	chr16:53801985	C	T	Body mass index adjsuted for physical activity in males	28448500	-0.0744	0	83931	IVNT
	rs9923544	chr16:53801985	C	T	Body mass index adjusted for physical activity	28448500	-0.0741	0	199108	IVNT
	rs9923544	chr16:53801985	C	T	Body mass index ajusted for physical activity in females	28448500	-0.0736	0	115178	IVNT
	rs1121980	chr16:53809247	G	A	Body mass index adjusted for physical activity	28448500	-0.0722	0	200314	IVNT
	rs9923544	chr16:53801985	C	T	Body mass index in physically active indivdiuals	28448500	-0.0715	0	137182	IVNT
	rs1121980	chr16:53809247	G	A	Body mass index in physically active indivdiuals	28448500	-0.071	0	138131	IVNT
	rs1121980	chr16:53809247	G	A	Body mass index ajusted for physical activity in females	28448500	-0.0696	0	115886	IVNT
	rs9923544	chr16:53801985	C	T	Body mass index in physically active indivdiuals	28448500	-0.0682	0	149169	IVNT
	rs1121980	chr16:53809247	G	A	Body mass index in physically active indivdiuals	28448500	-0.0676	0	150118	IVNT
	rs1457489	chr18:57861961	A	G	Body mass index adjusted for physical activity	28448500	0.0536	0	200332	IVNT
	rs523288	chr18:57848369	T	A	Body mass index adjusted for physical activity	28448500	0.0539	0	200367	IVNT
	rs8057044	chr16:53812614	A	G	Body mass index in physically active indivdiuals	28448500	0.0543	0	149166	IVNT
	rs1457489	chr18:57861961	A	G	Body mass index adjusted for physical activity	28448500	0.0565	0	180310	IVNT
	rs8057044	chr16:53812614	A	G	Body mass index in physically active indivdiuals	28448500	0.0573	0	137208	IVNT
	rs523288	chr18:57848369	T	A	Body mass index adjusted for physical activity	28448500	0.0581	0	180345	IVNT
	rs8057044	chr16:53812614	A	G	Body mass index adjusted for physical activity	28448500	0.0587	0	199108	IVNT
	rs8057044	chr16:53812614	A	G	Body mass index adjusted for physical activity	28448500	0.0615	0	179115	IVNT
	rs8050136	chr16:53816275	A	C	Body mass index in physically active indivdiuals	28448500	0.069	0	149169	IVNT
	rs8050136	chr16:53816275	A	C	Body mass index ajusted for physical activity in females	28448500	0.0699	0	114484	IVNT
	rs8050136	chr16:53816275	A	C	Body mass index in physically active indivdiuals	28448500	0.073	0	137184	IVNT
	rs8050136	chr16:53816275	A	C	Body mass index adjusted for physical activity	28448500	0.0758	0	196757	IVNT
	rs8050136	chr16:53816275	A	C	Body mass index in physically active males	28448500	0.0792	0	60953	IVNT
	rs8050136	chr16:53816275	A	C	Body mass index adjusted for physical activity	28448500	0.0799	0	176730	IVNT
	rs8050136	chr16:53816275	A	C	Body mass index adjsuted for physical activity in males	28448500	0.0844	0	82273	IVNT
CRP	rs12624640	chr20:32952125	A	G	Plasma protein C levels	20802025	NA	4.44e-08	8048	-
	rs12624640	chr20:32952125	A	G	Plasma protein C levels	20802025	NA	4.44e-08	8048	-
	rs584007	chr19:45416478	A	G	C-reactive protein	28887542	0.09	3.25e-08	9961	mg/L
	rs10774579	chr12:121405210	C	T	Plasma C reactive protein female	21647738	NA	1.6e-08	1709	-
	rs10832027	chr11:13357183	A	G	C reactive protein levels or triglyceride levels pleiotropy	27286809	NA	9e-09	-	-
	rs1260326	chr2:27730940	C	T	C reactive protein	23505291	NA	5.41e-09	8356	-
	rs1260326	chr2:27730940	C	T	C reactive protein	23505291	NA	5.41e-09	8356	-
[truncated: 8,154 more rows]

## Sheet: S5
Supplemental Table 5. Final IV set used in the multivariable MR analysis for LDL-C and TG on HDL-C.
SNP	EA	NEA	Beta_LDL	Beta_TG	Se_LDL	Se_TG	P_LDL	P_TG	Beta_outcome	Se_outcome	P_outcome
rs10053557	C	T	-0.0117316	-0.00952626	0.00164018	0.00161406	8.51e-13	3.59e-09	-0.00046158	0.0022865	0.84002
rs10069335	T	A	0.0464214	0.00627806	0.00688091	0.00677388	1.52e-11	0.354	0.0018849	0.010365	0.8557
rs10075612	T	G	-0.00135927	0.0148948	0.00183793	0.00180823	0.46	1.76e-16	-0.0057718	0.0025517	0.0237
rs10118089	T	C	0.0218936	0.00132771	0.00233267	0.00229267	6.25e-21	0.563	0.011933	0.0032882	0.00028466
rs10121339	A	G	0.00556531	0.0174045	0.00268302	0.00263704	0.0381	4.11e-11	-0.0021304	0.0037068	0.56547
rs1013710	A	G	0.0304718	0.0117423	0.00165498	0.00162774	1.05e-75	5.44e-13	-0.00054596	0.0022865	0.81128
rs10152458	T	G	0.00604894	-0.0109558	0.00169028	0.00166084	0.000345	4.21e-11	-0.00024455	0.0023443	0.91692
rs10171847	G	C	-0.0137086	-0.00411178	0.00169301	0.00166692	5.62e-16	0.0136	0.0036681	0.0023652	0.12094
rs10184376	T	C	-0.0271297	-0.00232593	0.00310033	0.00304811	2.12e-18	0.445	-0.0049592	0.0043014	0.24894
rs10184673	G	A	0.0195289	0.0045917	0.00168475	0.0016572	4.55e-31	0.00559	0.0084804	0.0023327	0.00027755
rs10199829	C	A	-0.0020949	-0.0151481	0.00175963	0.00172856	0.234	1.89e-18	0.00020151	0.0023177	0.93072
rs10223860	G	T	-0.00592191	0.0109709	0.00176139	0.00173277	0.000774	2.43e-10	0.0024464	0.0024585	0.3197
rs10229853	G	A	0.0176328	0.00710164	0.00298145	0.00293492	3.34e-09	0.0155	0.0073516	0.0043905	0.094049
rs10248717	G	A	0.0139868	-0.00727122	0.0018233	0.00179328	1.7e-14	5.02e-05	-0.0026332	0.002468	0.28599
rs10275549	A	T	-0.00132288	0.0394597	0.00228422	0.00224105	0.562	2.15e-69	-0.013701	0.0028948	2.2118e-06
rs1031101	G	A	0.0130442	-0.00221594	0.00232974	0.00228975	2.16e-08	0.333	0.0022713	0.0032599	0.48596
rs10405944	C	T	-0.0034284	-0.0100312	0.00175222	0.00171137	0.0504	4.59e-09	0.0036505	0.0023149	0.1148
rs10406304	T	G	0.0126705	0.00305867	0.00186464	0.00183408	1.08e-11	0.0954	-0.0036378	0.0025574	0.1549
rs1042023	C	G	0.132414	0.0172654	0.0078864	0.00773155	2.88e-63	0.0255	-0.0077584	0.011387	0.49565
rs10422350	C	A	0.00405176	-0.0146215	0.00188999	0.00185708	0.032	3.45e-15	-0.0025145	0.0025324	0.32074
rs1044573	G	A	0.00985364	0.00356308	0.00167778	0.00164917	4.28e-09	0.0307	0.0011662	0.0022773	0.60857
rs1045279	C	T	-0.00396049	-0.0129117	0.00229238	0.00225427	0.084	1.02e-08	0.00037746	0.0031976	0.90603
rs10503672	T	C	-0.000690819	0.0118141	0.00207549	0.00203989	0.739	6.97e-09	-0.0025884	0.0026256	0.32423
rs10757273	A	C	-0.0161003	-0.0046092	0.00189748	0.00185951	2.16e-17	0.0132	-0.00086389	0.0023258	0.71031
rs10775406	A	G	0.00464574	-0.0150475	0.00189836	0.00186769	0.0144	7.84e-16	0.0059148	0.0026663	0.026532
rs10784771	G	A	0.000122864	-0.00992532	0.00170376	0.00167328	0.943	3e-09	0.0014799	0.0022919	0.51848
rs10797566	T	G	0.0153235	0.004248	0.00172046	0.00168151	5.26e-19	0.0115	0.001692	0.0023196	0.46574
rs1081106	C	T	0.0565516	-0.00145798	0.00311725	0.0030656	1.5e-73	0.634	-0.0019277	0.0043562	0.65812
rs10814052	A	C	0.0121709	0.00748821	0.00223167	0.00219415	4.93e-08	0.000643	0.0010589	0.0030315	0.72686
rs10832956	T	C	-0.0211529	-0.00898383	0.00182597	0.00179439	4.94e-31	5.54e-07	-0.0066577	0.0026047	0.010586
rs10853981	A	G	0.00459314	0.0162377	0.00175664	0.00172875	0.00893	5.85e-21	-0.0069969	0.0024198	0.0038336
rs10863816	A	G	-0.00603694	-0.00999662	0.00179232	0.00176395	0.000757	1.45e-08	0.0037917	0.0025337	0.13453
rs10888898	A	G	-0.0400746	0.000794428	0.00178719	0.00176777	2.34e-111	0.653	-0.0017498	0.0023887	0.46384
rs10908475	G	C	0.00195128	0.0140598	0.00176259	0.00173454	0.268	5.24e-16	-0.0052617	0.0023885	0.027604
rs10932008	G	A	-0.0245058	-0.00585304	0.00220784	0.00216931	1.26e-28	0.00697	-0.0073045	0.0029133	0.012167
rs10936349	T	C	0.0111891	-0.00421268	0.00179982	0.00176887	5.07e-10	0.0172	0.0023847	0.0023865	0.31769
rs10944134	A	C	0.00146733	0.0128358	0.00193437	0.00189609	0.448	1.29e-11	-0.0057217	0.0024257	0.018338
rs10972078	A	G	-0.0019755	-0.0121381	0.00166115	0.00163489	0.234	1.13e-13	0.0048469	0.0022836	0.033796
rs10985875	G	T	-0.00407129	-0.0179293	0.00309302	0.00302479	0.188	3.08e-09	0.0046656	0.0036695	0.20357
rs11029265	A	G	0.00981821	0.0193722	0.00361806	0.00353893	0.00665	4.4e-08	-0.006874	0.0041291	0.095956
rs11046481	G	T	-0.00376553	-0.0170781	0.0020292	0.00198668	0.0635	8.23e-18	0.00060632	0.0026882	0.82156
rs11077553	A	G	-0.0128614	0.00153583	0.00201384	0.00197816	1.7e-10	0.438	0.0044831	0.0027242	0.099837
rs11078597	C	T	0.00469395	0.0159508	0.00213103	0.002093	0.0276	2.52e-14	0.0021394	0.0029193	0.46365
rs11096681	G	A	-0.0135628	-0.00412651	0.00197032	0.00192327	5.84e-12	0.0319	0.00015293	0.0023727	0.94861
rs11105294	A	G	0.0123242	0.000898878	0.00175727	0.00172711	2.33e-12	0.603	-0.004505	0.002394	0.059865
rs111232683	C	G	0.0140383	-0.00301885	0.00199078	0.00193578	1.77e-12	0.119	-0.0050923	0.0024029	0.03407
rs111243475	T	C	0.0343093	0.0155549	0.00478139	0.00469171	7.2e-13	0.000915	0.0082935	0.0066353	0.21134
rs11126031	A	T	0.00166542	-0.0181139	0.0021513	0.00210665	0.439	8.08e-18	0.0095693	0.0026119	0.00024856
rs111358663	A	T	-0.16152	0.033885	0.00720223	0.00708622	2.18e-111	1.74e-06	0.0094846	0.0093234	0.30902
rs111579799	T	A	0.00957351	0.0326575	0.00591843	0.00578107	0.106	1.61e-08	0.0081187	0.0072466	0.26257
rs111656050	A	G	-0.0174188	-0.0107234	0.00243058	0.00238281	7.69e-13	6.79e-06	0.0038548	0.0030078	0.19998
rs111732554	C	G	-0.0114854	-0.0716221	0.00729576	0.00713892	0.115	1.1e-23	0.0039794	0.0080078	0.61923
rs111740474	A	G	0.105515	0.0215586	0.00941102	0.00918477	3.57e-29	0.0189	-0.024213	0.0098558	0.014019
rs11175540	A	T	0.0261065	0.00218436	0.00341478	0.00335318	2.09e-14	0.515	0.0010337	0.0045054	0.81853
rs111953593	T	C	-0.011558	-0.0302709	0.00495104	0.00486326	0.0196	4.83e-10	-0.0057419	0.0065765	0.38261
rs11196149	A	G	-0.00864845	-0.014355	0.00258799	0.00254718	0.000832	1.74e-08	-0.00057903	0.0032119	0.85693
rs111981233	G	T	0.0113797	0.0271233	0.00318128	0.0031268	0.000347	4.16e-18	0.011388	0.0042034	0.006742
rs112125426	T	G	0.0941675	0.0363472	0.0101896	0.0100368	2.43e-20	0.000293	-0.018631	0.011754	0.11293
rs112146339	C	T	0.113377	0.0163399	0.00959359	0.00943162	3.15e-32	0.0832	-0.013792	0.01228	0.2614
rs112159161	T	C	-0.178601	-0.0114271	0.00718349	0.00709596	1.88e-136	0.107	-0.0099487	0.0091134	0.27498
rs1121985	A	C	-0.0110476	-0.00533386	0.00173061	0.00170078	1.73e-10	0.00171	-0.0016064	0.0023669	0.49733
rs112201728	T	C	0.0589085	0.0428348	0.00317459	0.00312635	7.26e-77	9.98e-43	-0.020797	0.0044811	3.469e-06
rs112299859	C	T	0.0111277	-0.090456	0.0111438	0.0109029	0.318	1.07e-16	0.021079	0.013459	0.11732
rs11230813	T	C	-0.0201392	0.011501	0.0036249	0.00355663	2.76e-08	0.00122	-0.0068042	0.0052254	0.19287
rs112319461	A	G	-0.00435084	-0.0320266	0.00406291	0.00399662	0.284	1.12e-15	0.01411	0.0055283	0.010699
rs112400003	C	A	-0.0219767	-0.0610694	0.00972893	0.00955927	0.0239	1.68e-10	-0.0080694	0.010905	0.45933
rs11242227	G	A	0.000919613	0.0176259	0.00261746	0.00257603	0.725	7.79e-12	-0.0071476	0.003707	0.053837
rs112557500	G	A	0.00453129	0.0412747	0.00756384	0.00745428	0.549	3.08e-08	-0.0083136	0.0094198	0.37747
rs112575086	T	C	-0.0154593	0.00615579	0.00250629	0.00246213	6.91e-10	0.0124	-0.002432	0.0035473	0.49296
rs112670287	C	A	0.0416306	0.0114351	0.00700547	0.00691458	2.81e-09	0.0982	0.0022378	0.010226	0.82677
rs112682351	C	A	0.0416797	-0.000172284	0.00693789	0.00681372	1.88e-09	0.98	0.0020212	0.0093937	0.82964
rs112847776	G	C	0.028805	-0.00821187	0.00300112	0.0029509	8.14e-22	0.00539	-0.00060852	0.0039891	0.87876
rs112939274	A	T	-0.0634701	-0.00848427	0.00972055	0.00946528	6.6e-11	0.37	0.0023505	0.013558	0.86237
rs113235777	G	C	-0.0255005	-0.0428487	0.00755599	0.00741617	0.000738	7.57e-09	0.0083127	0.010751	0.43939
rs113548930	A	T	0.0267463	0.00254201	0.00451139	0.00442088	3.05e-09	0.565	0.005282	0.0057864	0.36133
rs113565903	T	C	0.0388906	0.0254842	0.00545837	0.00538492	1.04e-12	2.22e-06	-0.016284	0.0067138	0.015289
rs113847133	A	G	-0.0327015	-0.0253358	0.00390533	0.00383803	5.59e-17	4.08e-11	-0.005645	0.0054348	0.29895
rs114040256	G	A	-0.0708882	-0.0706827	0.0101755	0.0100071	3.25e-12	1.63e-12	0.024614	0.010986	0.025061
rs114118094	T	A	-0.000961563	-0.018772	0.00317682	0.00312777	0.762	1.95e-09	0.0071544	0.0043675	0.1014
rs114382562	G	A	0.00887725	0.100657	0.00946615	0.0092918	0.348	2.4e-27	-0.0059495	0.01427	0.67673
rs114529418	A	T	-0.0125887	-0.0889042	0.00948121	0.00934166	0.184	1.78e-21	0.0091522	0.011453	0.42425
rs114634431	G	T	0.0194076	0.0151138	0.00255206	0.00251227	2.86e-14	1.79e-09	-0.0064287	0.0035435	0.069642
rs114703824	G	A	-0.0208117	0.0391522	0.00718883	0.00703945	0.00379	2.67e-08	-0.011284	0.010478	0.28154
rs114760478	A	G	0.00591945	-0.0689332	0.0106567	0.0104031	0.579	3.44e-11	0.022613	0.010917	0.038314
rs114872747	C	T	0.0951254	0.00791041	0.0152054	0.0149935	3.95e-10	0.598	0.018478	0.020633	0.3705
rs115288106	C	G	0.058144	0.0673366	0.0117471	0.0114095	7.43e-07	3.6e-09	-0.010054	0.013013	0.43976
rs115358989	T	C	0.0162005	-0.0507754	0.00843888	0.00831784	0.0549	1.03e-09	0.014585	0.010363	0.1593
rs11541461	C	T	-0.0519539	0.0326785	0.00933414	0.00920902	2.61e-08	0.000387	-0.0042374	0.014868	0.77565
rs115426759	G	A	-0.0852953	-0.00399523	0.0148216	0.0146606	8.67e-09	0.785	0.0036077	0.013787	0.79358
rs115590407	A	G	0.0739636	0.0225921	0.00977703	0.0096063	3.88e-14	0.0187	0.0073784	0.012803	0.5644
rs115692156	G	A	-0.0754246	-0.00754222	0.0085091	0.00837786	7.72e-19	0.368	0.0065523	0.012935	0.61247
rs115717608	C	T	0.0439742	-5.84014e-05	0.00671509	0.00660524	5.81e-11	0.993	-0.004829	0.0067654	0.47537
rs11580946	A	G	-0.0231915	-0.043354	0.00696583	0.00686796	0.000871	2.75e-10	0.0079232	0.0089382	0.37538
rs11591026	T	G	0.0279066	0.00189823	0.00412003	0.00405868	1.26e-11	0.64	-0.0046973	0.0055968	0.40131
rs11620731	T	C	-0.0249009	-0.000219471	0.00232814	0.0022903	1.07e-26	0.924	0.0057482	0.0032529	0.077211
rs11621792	T	C	0.0207703	0.00231211	0.00168904	0.00167097	9.39e-35	0.166	0.0027952	0.0023005	0.22436
rs116248813	T	C	-0.00178898	-0.0491542	0.0072539	0.00712384	0.805	5.2e-12	0.01487	0.0091337	0.10352
rs11635502	A	G	0.0126574	0.0189155	0.00179194	0.00176112	1.62e-12	6.56e-27	-0.001726	0.0024668	0.48412
rs116425781	G	C	0.00862547	0.0721098	0.00678188	0.00664677	0.203	2.02e-27	0.0092735	0.0089739	0.30142
rs116449148	A	G	0.0243669	0.0599575	0.00969568	0.00958087	0.012	3.9e-10	-0.0074406	0.013136	0.5711
rs11646864	G	A	0.00238409	-0.0121413	0.00209396	0.00205995	0.255	3.77e-09	0.00023676	0.0029274	0.93554
rs116487096	A	T	-0.0297145	-0.0115186	0.00447897	0.00440825	3.26e-11	0.00898	0.0068584	0.0056948	0.22847
rs116513478	T	C	0.0981202	0.00085175	0.0125142	0.0122447	4.48e-15	0.945	0.028051	0.013349	0.035614
rs11657236	T	G	0.00897544	-0.0142251	0.00209884	0.00206111	1.9e-05	5.14e-12	-0.0025398	0.0028295	0.36939
rs116603069	A	G	0.00830776	0.0631017	0.00584821	0.00576664	0.155	7.21e-28	0.0038602	0.0081334	0.63507
rs11665760	T	C	0.00581556	0.0118363	0.00187674	0.00184183	0.00194	1.31e-10	-0.0043126	0.0024763	0.081581
rs11671066	G	A	-0.00687945	-0.0133096	0.00186236	0.00183105	0.000221	3.63e-13	-0.0015587	0.0025735	0.54473
rs11679879	A	G	0.0108612	-0.0162836	0.00234299	0.00230594	3.56e-06	1.65e-12	0.0059263	0.0032012	0.06413
rs116885898	C	T	-0.340104	0.108675	0.0131099	0.0129199	2.21e-148	4.05e-17	0.040425	0.016967	0.017196
rs11694716	G	A	0.00397124	0.00965553	0.00172292	0.00169471	0.0212	1.22e-08	0.0036132	0.0023867	0.13005
rs117037316	G	C	0.0208086	0.010751	0.00368242	0.00363183	1.6e-08	0.00307	0.0079483	0.0044937	0.076938
rs117139027	A	G	-0.0654347	0.0148801	0.00836812	0.00829653	5.3e-15	0.0729	-0.019721	0.0087553	0.024294
rs117260553	A	G	-0.0086086	-0.0812083	0.0111997	0.0110332	0.442	1.83e-13	0.033275	0.01487	0.025237
rs117350303	G	A	-0.0630422	-0.10142	0.0107774	0.0106863	4.93e-09	2.3e-21	0.023717	0.012156	0.051041
rs117377791	C	T	0.107206	-0.0101835	0.0153571	0.0149903	2.93e-12	0.497	0.048131	0.026595	0.07033
rs11739254	G	A	-0.0533998	-0.00701225	0.00834854	0.00825996	1.59e-10	0.396	-0.011038	0.0070965	0.11983
rs11745702	C	T	-0.00283028	-0.0162864	0.00189431	0.00186076	0.135	2.09e-18	0.0087857	0.0026177	0.00079025
rs11757517	T	C	-0.0239462	-0.00637225	0.00347155	0.00342123	5.28e-12	0.0625	-0.01	0.0050286	0.046743
rs117602337	T	C	-0.0950528	0.0294021	0.00385642	0.00378602	3.87e-134	8.1e-15	0.010844	0.0049439	0.028284
rs11765031	T	C	0.00118734	-0.0109548	0.00180351	0.00176079	0.51	4.92e-10	0.00049971	0.0023514	0.83171
rs117753658	G	A	-0.0571821	-0.00575521	0.00668891	0.00654467	1.24e-17	0.379	-0.019941	0.0084763	0.018645
rs11781275	C	T	0.000388552	0.0208136	0.00305347	0.00300027	0.899	4e-12	-0.0093131	0.0041922	0.026315
rs117912158	T	C	0.0818891	0.0924121	0.0127849	0.0124995	1.5e-10	1.43e-13	0.028631	0.014167	0.043288
rs117970794	T	C	-0.120411	-0.149185	0.0126931	0.0123553	2.39e-21	1.44e-33	0.014901	0.016155	0.35632
rs118034733	C	G	-0.0293889	-0.00813788	0.00479947	0.00473243	9.16e-10	0.0855	0.0055519	0.0066097	0.40093
rs118039278	A	G	0.111285	-0.00921509	0.00338885	0.00333609	1e-200	0.00574	0.016619	0.0041949	7.4393e-05
rs118088990	A	G	-0.00675524	0.0270024	0.0034121	0.00335706	0.0477	8.73e-16	-0.011917	0.0047192	0.011566
rs118124774	T	G	-0.0105948	-0.0193973	0.00334499	0.00327739	0.00154	3.25e-09	0.0057882	0.0041791	0.16604
rs118163475	T	C	0.0796961	0.00726167	0.00918091	0.0090304	3.94e-18	0.421	-0.026809	0.01112	0.015911
rs11846704	T	C	-0.0123206	0.000759216	0.00184495	0.00181497	2.42e-11	0.676	0.0027647	0.0025822	0.28431
rs11896426	A	T	0.0026619	-0.0113001	0.00200138	0.00196735	0.184	9.26e-09	0.004139	0.0028177	0.14186
rs1196760	G	C	0.0193682	0.00210568	0.0029291	0.00289493	3.78e-11	0.467	0.0042522	0.0039147	0.27738
rs12054451	G	T	0.0150594	0.00271858	0.00186614	0.0018365	7.04e-16	0.139	-0.0011679	0.0026171	0.65541
rs12084478	C	T	-0.0085983	-0.0118517	0.00172404	0.00169604	6.12e-07	2.79e-12	-0.00045611	0.0023461	0.84586
rs12129763	C	T	0.000116442	-0.00970654	0.00166861	0.00164303	0.944	3.47e-09	0.0037685	0.0023114	0.10302
rs12136217	A	G	0.0358309	0.00396037	0.0035092	0.00345197	1.78e-24	0.251	0.0076919	0.004682	0.10041
rs12144930	A	G	0.00126857	0.0240195	0.00362244	0.00356818	0.726	1.68e-11	-0.0045183	0.005146	0.37993
rs12194350	T	C	0.00454223	0.0135405	0.00230528	0.00226811	0.0488	2.37e-09	-0.0017262	0.0031462	0.58324
rs12208357	T	C	0.0593462	0.042406	0.00316784	0.00311878	2.62e-78	4.17e-42	-0.020405	0.0044838	5.3463e-06
rs12214416	A	T	-0.0304855	0.00130984	0.00397649	0.00389658	1.77e-14	0.737	0.011976	0.0054939	0.029264
rs12218844	G	A	-0.0161641	-0.00125878	0.00277274	0.00271056	5.55e-09	0.642	0.0047403	0.0034686	0.17174
rs12233810	T	C	-0.00180337	-0.0104075	0.00186246	0.00183215	0.333	1.34e-08	0.0037464	0.0025608	0.14347
rs12254046	T	C	0.0184494	0.0412957	0.00653792	0.00638944	0.00477	1.03e-10	-0.0078046	0.0073387	0.28756
rs1229499	T	A	0.007803	0.0119573	0.00181939	0.00178946	1.8e-05	2.36e-11	-0.0013845	0.0025347	0.58491
rs12320328	G	A	-0.0257293	-0.0180942	0.0029879	0.0029439	7.23e-18	7.93e-10	-0.0018592	0.0041097	0.65099
rs12331971	G	A	0.00814767	0.0115266	0.00206756	0.00203304	8.12e-05	1.43e-08	0.0014103	0.0028415	0.61968
rs12355391	C	A	0.011956	0.00789433	0.00172611	0.00166517	4.31e-12	2.13e-06	0.0054576	0.0023056	0.017928
rs12409233	C	G	-0.0247767	0.00104706	0.00290722	0.00286405	1.56e-17	0.715	0.0003208	0.0039234	0.93483
rs12437980	T	C	-0.000533804	0.0103132	0.00173487	0.00170572	0.758	1.48e-09	-0.003803	0.002391	0.11172
rs12445401	G	A	0.053575	0.0216595	0.00210869	0.00207082	2.12e-142	1.33e-25	-0.0011613	0.0029084	0.68968
rs12445804	A	G	0.0290581	0.0107546	0.00316767	0.0031111	4.59e-20	0.000547	-0.0028195	0.004379	0.51967
rs12529313	G	A	0.00560887	0.0233031	0.00225104	0.00221772	0.0127	7.96e-26	-0.00054164	0.0031489	0.86343
rs12565026	A	T	-0.00539736	-0.0136582	0.00187219	0.00184286	0.00394	1.25e-13	0.0064881	0.0026128	0.013022
rs12574790	T	C	0.0208127	0.16389	0.00820932	0.00807484	0.0112	1.38e-91	-0.092562	0.01214	2.4535e-14
rs12581963	A	G	0.0170689	0.0184289	0.00322216	0.00316175	1.17e-07	5.59e-09	0.00067048	0.004445	0.8801
rs12601778	T	C	0.00358717	0.0117497	0.0017949	0.00176057	0.0457	2.49e-11	-0.0032517	0.0023158	0.16028
rs12617848	T	C	0.00864935	0.0292021	0.00240913	0.0023661	0.00033	5.39e-35	-0.0060848	0.0032426	0.060582
rs12714264	T	A	-0.118136	-0.00736623	0.00247104	0.00243544	1e-200	0.00249	-0.013238	0.0034175	0.00010729
rs12743272	A	G	-0.000802811	0.0166936	0.0024304	0.00239374	0.741	3.08e-12	0.0020178	0.0033314	0.54472
rs12747477	A	G	-0.338821	0.0022296	0.00908348	0.00897332	1e-200	0.804	-0.012153	0.013043	0.35146
rs12750160	T	C	-0.322248	-0.0133057	0.0102497	0.010134	1e-200	0.189	-0.0028528	0.010641	0.78862
rs12772930	A	G	0.00273918	0.0111185	0.00172698	0.00169282	0.113	5.1e-11	0.00053167	0.0023769	0.823
rs12788711	G	A	0.00268569	0.0114252	0.00208631	0.00204984	0.198	2.49e-08	0.00019515	0.0028656	0.94571
rs12791103	T	G	-0.023076	-0.0611138	0.002778	0.00272893	9.84e-17	4.42e-111	0.02876	0.0038506	8.0953e-14
rs12891399	C	T	0.00214376	0.0119262	0.00174114	0.00171393	0.218	3.44e-12	0.0023076	0.0024072	0.33775
rs12924886	T	A	0.0542273	0.0211843	0.00207781	0.00203625	3.81e-150	2.39e-25	-0.0010446	0.0029124	0.71984
rs12977629	C	A	0.0106892	-0.0108147	0.00176587	0.00173654	1.42e-09	4.73e-10	-0.0043865	0.0023775	0.065036
rs12978957	A	T	-0.0250796	-0.000405931	0.00305307	0.00300103	2.13e-16	0.892	0.005685	0.0042544	0.18147
rs12978990	T	C	0.0126241	0.0211073	0.00248892	0.00244319	3.93e-07	5.66e-18	-0.0027959	0.0033065	0.39779
rs12989189	C	A	0.00321644	0.0160575	0.00256208	0.00251987	0.209	1.86e-10	-0.0027838	0.0034663	0.42193
rs13010956	C	T	-0.0109096	-0.00808722	0.00170634	0.00167747	1.62e-10	1.43e-06	-0.0022097	0.0023023	0.33716
rs13161656	C	T	0.0224598	-0.002719	0.00265533	0.00261201	2.71e-17	0.298	-0.0034174	0.0036868	0.35396
rs13189347	C	A	-0.016538	0.000897385	0.00165943	0.00163345	2.15e-23	0.583	-0.00057092	0.0022868	0.80285
rs13214458	T	G	-0.00341607	-0.0115437	0.00189647	0.00186621	0.0717	6.19e-10	0.0034339	0.0026271	0.19117
rs13239670	C	T	0.00369541	-0.0433771	0.00175252	0.00172092	0.035	3.46e-140	0.018204	0.0022994	2.4464e-15
rs1326122	A	C	-0.0210942	-0.0445379	0.00553047	0.005435	0.000137	2.51e-16	0.01293	0.0078246	0.098438
rs132642	A	T	0.0138409	-0.00347679	0.00221123	0.00217404	3.87e-10	0.11	0.0054896	0.0030346	0.070449
rs13268	G	A	-0.0312371	0.000397829	0.00540137	0.00531657	7.33e-09	0.94	0.003513	0.0072128	0.62622
rs13276352	C	T	0.000542507	0.0271872	0.00206952	0.00203653	0.793	1.19e-40	0.0033275	0.0028153	0.23724
rs1329126	C	A	0.0203479	0.00323641	0.00241853	0.00238252	3.99e-17	0.174	0.0084151	0.0033191	0.011233
rs13418648	G	T	-0.00107706	-0.0101716	0.00183368	0.00180446	0.557	1.73e-08	0.0037558	0.0025376	0.13886
rs137886411	A	G	0.0566734	0.00514895	0.00927057	0.00907247	9.76e-10	0.57	0.0088938	0.010911	0.41499
rs137925862	A	G	0.0050243	-0.0442633	0.00692062	0.00680408	0.468	7.75e-11	0.0060818	0.0081747	0.45689
rs137928795	T	C	0.12513	0.0329859	0.0164524	0.0160861	2.84e-14	0.0403	-0.041975	0.017407	0.015894
rs138335	C	G	0.0127459	-0.00333117	0.00178452	0.00174838	9.17e-13	0.0567	0.00027596	0.0024068	0.90872
rs138361368	A	C	-0.1032	-0.0118938	0.00626462	0.00615748	5.69e-61	0.0534	0.035685	0.0079986	8.1451e-06
rs138483078	A	G	0.0329718	0.00337492	0.00235618	0.00231548	1.7e-44	0.145	-0.0056992	0.003214	0.076191
rs138607350	G	T	0.152212	0.108267	0.00915174	0.00904884	4.09e-62	5.44e-33	-0.015717	0.012898	0.22301
rs139144103	G	A	0.0682796	0.0375683	0.00951057	0.00929818	7e-13	5.34e-05	-0.01467	0.012878	0.25465
rs139232176	A	G	-0.219609	-0.00835054	0.0140116	0.013742	2.3e-55	0.543	-0.01173	0.021049	0.57732
rs139260949	C	T	0.00351277	-0.0220022	0.00362121	0.003553	0.332	5.92e-10	0.0061358	0.0050379	0.22325
rs139397352	G	A	0.070541	0.00917821	0.0103053	0.00999275	7.64e-12	0.358	-0.006669	0.010971	0.54328
rs139605439	A	G	-0.0621109	-0.0849698	0.0147906	0.0144898	2.68e-05	4.52e-09	0.023308	0.014972	0.11953
rs140049599	C	G	-0.121563	0.0633642	0.0144551	0.0142865	4.11e-17	9.2e-06	-0.0017956	0.020328	0.92961
rs140488605	T	C	0.0745369	0.0109822	0.00444486	0.00437129	4.1e-63	0.012	0.012665	0.0055744	0.023093
rs140515992	T	C	-0.0732505	-0.0687741	0.00762185	0.00747603	7.21e-22	3.6e-20	-0.014752	0.010351	0.15411
rs140570886	C	T	0.205935	-0.0115211	0.00734504	0.00724298	5.71e-173	0.112	0.012777	0.0093403	0.17132
rs140667516	G	A	-0.00144831	0.0748319	0.00814686	0.00801087	0.859	9.52e-21	0.010205	0.0090235	0.25809
rs140779352	A	C	-0.077168	-0.142405	0.010258	0.010136	5.37e-14	7.77e-45	0.012817	0.015521	0.40892
rs140947018	A	G	-0.0133501	-0.0335692	0.00499455	0.00492007	0.00752	8.92e-12	-0.0092142	0.0068666	0.17963
rs140959239	T	C	0.0408896	0.135429	0.0124504	0.0121909	0.00102	1.13e-28	0.011871	0.014178	0.40243
rs141142609	G	T	0.0414289	-0.0136474	0.00754558	0.00739013	4.01e-08	0.0648	-0.0035595	0.008234	0.66553
rs141234987	G	A	-0.028679	-0.00469974	0.00520328	0.00511762	3.55e-08	0.358	0.0077989	0.0064569	0.22711
rs1415700	G	A	-0.00972514	-0.0148151	0.00180688	0.00177799	7.35e-08	7.92e-17	0.0053534	0.0024823	0.031033
rs141635455	T	G	-0.036577	-0.0552596	0.00859587	0.00844315	2.09e-05	5.95e-11	-0.013649	0.011738	0.24491
rs141778417	T	C	0.0589911	-0.00581932	0.00879967	0.00866374	2.03e-11	0.502	-0.022827	0.010902	0.036281
rs141964576	G	C	0.0691336	0.00778173	0.0109706	0.0107655	2.94e-10	0.47	0.0022362	0.01449	0.87735
rs142138315	T	C	-0.0498789	-0.0652486	0.0108056	0.0105724	3.91e-06	6.76e-10	-0.010323	0.016132	0.52224
rs142282653	G	A	0.0160915	0.101411	0.0153389	0.0151751	0.294	2.35e-11	0.0044069	0.018987	0.81646
rs143076454	A	G	0.00803013	0.0414574	0.00698276	0.00685904	0.25	1.5e-09	-0.0124	0.0083886	0.13936
rs143373095	G	A	-0.0559075	-0.00666647	0.00857128	0.00844145	6.91e-11	0.43	0.015359	0.011098	0.16636
rs143421598	T	C	0.0110974	0.0711164	0.00831844	0.00817815	0.182	3.44e-18	-0.0065062	0.0091396	0.47655
rs143431312	T	C	0.065051	0.000699924	0.00858791	0.00841708	3.6e-14	0.934	-0.0047304	0.010479	0.65169
rs143646411	C	T	0.0574573	-0.00843301	0.00700879	0.00688118	2.45e-16	0.22	0.0025135	0.0090105	0.78028
rs144116871	T	C	0.0593238	-0.00115881	0.0100425	0.00988846	3.48e-09	0.907	0.01817	0.011155	0.10334
rs144295214	A	G	0.0375806	0.00145262	0.00436142	0.00428423	6.9e-18	0.735	0.010408	0.0052053	0.045554
rs1443223	A	G	0.000688364	-0.0116114	0.00169471	0.00166636	0.685	3.21e-12	0.0041374	0.0023324	0.076083
rs144433805	C	T	-0.0199399	-0.055434	0.0084758	0.0083401	0.0186	3e-11	-0.004161	0.012724	0.74365
rs144458455	G	C	0.0586868	0.0740861	0.0114609	0.011379	3.05e-07	7.48e-11	-0.01609	0.013644	0.23828
rs144750362	C	T	-0.0846628	-0.0151291	0.0118741	0.0117189	1e-12	0.197	-0.0040243	0.016914	0.81194
rs145372536	A	G	0.117392	0.0351621	0.0190661	0.0187442	7.41e-10	0.0607	-0.0092096	0.020369	0.65117
rs145467679	C	T	0.0601127	0.0223749	0.00934837	0.00921129	1.27e-10	0.0151	-0.0052794	0.012547	0.67392
rs145555063	T	C	0.0156505	0.0340332	0.00571202	0.00560777	0.00615	1.29e-09	-0.00093088	0.0069776	0.89387
rs145655010	C	G	-0.0423739	-0.0316794	0.00754184	0.00742243	1.93e-08	1.97e-05	0.013813	0.009964	0.16566
rs145713446	A	T	0.094772	0.0342171	0.0114285	0.0112863	1.11e-16	0.00243	-0.030201	0.015503	0.051409
rs145729706	A	G	0.0672043	0.0218891	0.00662709	0.0065084	3.64e-24	0.00077	0.014356	0.0089625	0.1092
rs145914258	A	G	0.0251451	0.186071	0.00804957	0.00787891	0.00179	2.62e-123	-0.066368	0.010098	4.9615e-11
rs146027376	G	C	0.0625126	0.000278676	0.00803261	0.0078743	7.12e-15	0.972	0.009108	0.0079898	0.25431
rs146096809	A	G	0.00769612	0.0437392	0.00575482	0.00566504	0.181	1.16e-14	-0.0096288	0.0081558	0.23776
rs146304328	A	G	0.0497776	0.0152036	0.0079519	0.00780873	3.85e-10	0.0515	0.0024892	0.0092287	0.78737
rs146304496	A	G	-0.0404209	-0.0123793	0.00490728	0.00482892	1.77e-16	0.0104	0.0067228	0.0065887	0.30756
rs146440887	T	C	0.0354696	0.0713402	0.00839601	0.00826866	2.39e-05	6.26e-18	-0.032494	0.010481	0.0019335
rs1464780	G	A	-0.0086956	-0.0267121	0.00361727	0.00355823	0.0162	6.04e-14	0.0010628	0.0052462	0.83946
rs146785959	C	G	-0.199333	0.00098477	0.00919909	0.00908391	4.04e-104	0.914	0.012642	0.011164	0.25748
rs146795181	A	G	0.0387839	-0.0055218	0.00547796	0.00538154	1.44e-12	0.305	-0.010933	0.0069511	0.11575
rs147259681	T	C	0.0337401	0.0116782	0.00586454	0.00577964	8.75e-09	0.0433	-0.0070869	0.0075075	0.34518
rs147547063	C	T	0.0144252	0.0666807	0.0105128	0.010288	0.17	9.09e-11	0.025392	0.014668	0.083435
rs147555597	A	G	0.141184	0.00179923	0.00939817	0.00927539	5.23e-51	0.846	0.0093739	0.01186	0.42929
rs147636938	T	C	0.170754	0.103278	0.00551414	0.00540476	1e-200	2.14e-81	-0.043943	0.0072904	1.6665e-09
rs147711004	A	G	0.1625	0.0310184	0.0046639	0.00458298	1e-200	1.3e-11	-0.075264	0.0061635	2.7563e-34
rs147905848	G	C	-0.0371023	-0.0151749	0.00432753	0.00424246	1e-17	0.000348	-0.0052493	0.005756	0.36178
rs147957878	T	C	-0.0285764	-0.0608665	0.00930361	0.00920557	0.00213	3.79e-11	0.0030696	0.011797	0.79471
rs148136992	G	A	-0.0240575	-0.00235086	0.00298847	0.0029402	8.27e-16	0.424	0.0026599	0.0038389	0.48837
rs148566631	A	G	0.0237021	0.0170347	0.00255531	0.0025146	1.77e-20	1.25e-11	-0.0037815	0.0035187	0.28251
rs1486000	G	A	-0.00448775	-0.0142059	0.00228049	0.0022404	0.0491	2.29e-10	0.0041045	0.0030723	0.18155
rs148724334	C	G	0.0547133	-0.000973983	0.00735901	0.00721148	1.05e-13	0.893	0.016884	0.0082996	0.041916
rs148949871	A	G	0.0121531	0.0411534	0.00755485	0.00743624	0.108	3.13e-08	-0.011622	0.0099505	0.2428
rs1491508	T	C	0.0152751	0.0137137	0.0020759	0.00204287	1.86e-13	1.91e-11	-0.0052169	0.0028961	0.071652
rs149233695	T	G	-0.0439718	-0.0023308	0.00604985	0.00591454	3.64e-13	0.694	-0.012455	0.0076923	0.10541
rs149347332	G	A	-0.00668037	0.0785386	0.0126253	0.0123869	0.597	2.29e-10	-0.021928	0.016108	0.17342
rs149841512	A	G	0.0362852	0.00861391	0.00616987	0.0060777	4.08e-09	0.156	0.0002275	0.0075263	0.97589
rs149893205	C	T	-0.0169176	-0.0995794	0.0103792	0.0101337	0.103	8.65e-23	0.020353	0.017095	0.23381
rs149951966	C	T	-0.00296404	-0.013325	0.00247569	0.00241776	0.231	3.56e-08	0.0034849	0.002963	0.23953
rs149994632	T	C	-0.00260543	0.0503755	0.00925256	0.00916306	0.778	3.85e-08	-0.0059766	0.013333	0.65397
rs150202096	G	A	0.00247285	-0.0837786	0.0130799	0.0128895	0.85	8.05e-11	0.020172	0.014262	0.15724
rs150474434	A	G	-0.042255	-0.00833153	0.00284724	0.00280282	7.99e-50	0.00295	0.00093234	0.0037878	0.80557
rs150611042	A	C	-0.0187419	-0.0243292	0.00344733	0.00338266	5.43e-08	6.37e-13	0.010311	0.0045395	0.023119
rs150778385	G	T	0.0188896	0.00128429	0.00286474	0.0028166	4.29e-11	0.648	-0.0041521	0.003955	0.2938
rs1508099	C	A	0.00205484	0.0170642	0.00180453	0.00177461	0.255	6.86e-22	-0.005837	0.002524	0.020745
rs1508103	G	A	0.0109556	0.0470431	0.0034093	0.00335096	0.00131	9.04e-45	-0.018153	0.0048331	0.00017267
rs150841922	C	T	0.00559232	0.0539949	0.00929599	0.00915482	0.547	3.68e-09	-0.016147	0.014172	0.25458
rs150893545	T	A	0.0696157	-0.0239666	0.0111593	0.0109613	4.42e-10	0.0288	0.0066329	0.012148	0.58506
rs1509338	A	G	0.0017063	0.00930277	0.00164982	0.001623	0.301	9.93e-09	-0.00088843	0.0022809	0.6969
rs151193598	A	G	0.118523	0.0394395	0.0118711	0.0116168	1.79e-23	0.000686	-0.0014986	0.016332	0.92689
rs151330717	A	G	-0.310484	0.0475664	0.00740891	0.00730408	1e-200	7.4e-11	0.044728	0.0083729	9.1974e-08
rs1571953	C	T	-0.00106372	-0.0124171	0.0019682	0.00193745	0.589	1.46e-10	0.0019257	0.0027449	0.48295
rs15864	C	G	-0.0203586	-0.00211183	0.00180633	0.00177909	1.83e-29	0.235	0.0090179	0.0024736	0.00026678
rs165316	G	A	-0.00892157	-0.0145216	0.00203495	0.00200285	1.16e-05	4.15e-13	-0.0026519	0.0028565	0.35322
rs167139	C	T	0.0141325	0.0108787	0.00189998	0.00186921	1.02e-13	5.89e-09	0.0018612	0.0025558	0.46648
rs1684600	T	C	-0.00277459	0.00993415	0.00181516	0.00178384	0.126	2.56e-08	-0.0018334	0.0024846	0.46058
rs16861497	T	G	-0.0098579	-0.00192051	0.00167948	0.00165096	4.37e-09	0.245	0.0003744	0.0023429	0.87304
rs16988435	T	C	0.031968	0.00486035	0.00377587	0.00371024	2.53e-17	0.19	0.0043569	0.0055284	0.43064
rs17005360	T	C	-0.0245805	-0.0108844	0.00407028	0.00400127	1.55e-09	0.00652	0.001295	0.0052133	0.80383
rs17031494	G	T	0.0330578	0.00527942	0.00217272	0.00213692	2.81e-52	0.0135	-0.0025645	0.0030616	0.40224
rs17053831	G	A	0.0219592	0.0170399	0.00368858	0.00362831	2.63e-09	2.65e-06	-0.0069051	0.0052465	0.18813
rs17109407	G	C	-0.0231045	0.00188524	0.00326844	0.0032157	1.56e-12	0.558	0.00012831	0.0046917	0.97818
rs17110517	T	C	-0.0256802	-0.00360139	0.00391098	0.00384479	5.16e-11	0.349	0.0065911	0.0050362	0.19063
rs17144546	A	G	-0.0353145	-0.00658217	0.00537973	0.00529029	5.23e-11	0.213	-0.0081626	0.0075077	0.27694
rs17249085	T	G	0.0897185	0.00299503	0.00861467	0.00847197	2.13e-25	0.724	0.0018308	0.011399	0.8724
rs1736177	T	C	0.0156449	0.00146855	0.0017994	0.00177069	3.48e-18	0.407	0.0074193	0.002502	0.0030232
rs17382315	T	C	0.00927017	0.0134905	0.00175927	0.00172995	1.37e-07	6.28e-15	-0.0064335	0.0023964	0.0072598
rs1738468	G	T	0.0104671	-9.271e-05	0.00181477	0.0017834	8.03e-09	0.959	0.00042837	0.0023987	0.85826
rs17519079	A	G	-0.00674826	-0.031922	0.00333441	0.00327785	0.043	2.06e-22	-0.00066702	0.0046001	0.88471
rs17528296	T	C	0.036551	0.012238	0.00299753	0.00294979	3.36e-34	3.34e-05	-0.00024758	0.0044162	0.95529
rs1755618	T	G	0.00513384	0.0146545	0.00233577	0.00229891	0.028	1.84e-10	0.0060024	0.0032748	0.06682
rs17603662	T	C	-0.0621188	-0.0149842	0.00569611	0.00561887	1.09e-27	0.00766	-0.011439	0.007662	0.13544
rs17625826	C	A	-0.00663548	-0.0502005	0.00653969	0.0064172	0.31	5.17e-15	0.021884	0.0088882	0.01381
rs17665178	G	C	-0.0182802	-0.000731757	0.00184964	0.00181876	4.93e-23	0.687	-0.00093793	0.0025341	0.7113
rs17665563	T	C	0.0135329	-0.0026076	0.00172014	0.00169257	3.62e-15	0.123	0.0031655	0.0024199	0.19084
rs17779355	A	G	0.0176962	-0.0272825	0.00347354	0.00341954	3.5e-07	1.48e-15	-0.0045752	0.0044708	0.30615
rs17817945	T	C	-0.0210157	-0.0150788	0.00279463	0.00274866	5.48e-14	4.11e-08	0.0076894	0.0036198	0.033649
rs1799963	A	G	-0.0248789	-0.102316	0.00920328	0.00904452	0.00687	1.14e-29	0.019085	0.011002	0.082805
rs1800480	C	G	-0.187116	-0.0384441	0.00873556	0.00858073	8.69e-102	7.45e-06	0.039958	0.010208	9.0596e-05
rs180760728	C	T	-0.34182	-0.0242031	0.00991889	0.00969778	1e-200	0.0126	0.004357	0.013037	0.73822
rs181174790	T	C	0.0185624	0.0748634	0.0094616	0.00929385	0.0498	7.94e-16	-0.012769	0.01222	0.29608
rs181664929	A	G	-0.107	-0.0261664	0.0144949	0.0142705	1.56e-13	0.0667	0.006663	0.018908	0.72455
rs181897168	A	G	-0.0709495	-0.0129638	0.010282	0.0100152	5.19e-12	0.196	-0.0019885	0.012474	0.87334
rs181954094	C	T	-0.00792736	0.0836827	0.0124312	0.0123427	0.524	1.2e-11	-0.030392	0.016635	0.067697
rs182142147	A	G	-0.0693834	-0.00749345	0.0108958	0.0106542	1.92e-10	0.482	0.0092978	0.010649	0.38261
rs182475915	T	A	-0.122631	0.000338166	0.012943	0.0127465	2.68e-21	0.979	0.036315	0.018096	0.044778
rs182483424	G	A	0.00286881	-0.0378138	0.00646712	0.00631659	0.657	2.15e-09	-0.0093045	0.0075772	0.21946
rs182614118	G	A	0.0900666	0.00375062	0.0152254	0.0149997	3.31e-09	0.803	0.022716	0.017294	0.18902
rs182616603	T	C	0.124847	0.0472954	0.0128085	0.0125226	1.9e-22	0.000159	0.017107	0.02123	0.42036
rs1826906	C	T	0.00490588	0.0107924	0.00175507	0.001727	0.00519	4.13e-10	0.0034221	0.0024298	0.15901
rs182768698	T	G	0.0856087	0.0357568	0.0139215	0.0137587	7.78e-10	0.00935	-0.0031656	0.026892	0.90629
rs183150640	C	A	0.0649381	-0.00417522	0.0117906	0.0114864	3.64e-08	0.716	0.012585	0.018726	0.50155
rs183427010	A	G	0.165442	0.0385759	0.0116096	0.0113748	4.45e-46	0.000695	-0.051924	0.015788	0.0010059
rs183605932	T	C	0.0046131	-0.110199	0.0164112	0.0160291	0.779	6.2e-12	0.044165	0.0209	0.034592
rs183811342	C	G	0.122305	-0.0166304	0.0222197	0.0218893	3.71e-08	0.447	-0.0045179	0.024084	0.8512
rs184507838	T	C	-0.116783	-0.0180615	0.00763536	0.00753157	8.25e-53	0.0165	-0.026503	0.013673	0.052575
rs184793043	A	G	0.0482724	0.245653	0.0123336	0.0120303	9.08e-05	1.12e-92	-0.10373	0.015866	6.2507e-11
rs184817754	G	A	-0.0572148	-0.0213634	0.00920265	0.00903541	5.06e-10	0.0181	-0.0057135	0.010872	0.59923
rs185255949	A	G	-0.0344314	-0.0428534	0.00782202	0.00769478	1.07e-05	2.56e-08	0.0082518	0.010823	0.44582
rs186089606	G	A	0.0857546	0.0085632	0.0103621	0.0101768	1.28e-16	0.4	-0.010389	0.016023	0.51671
rs186913468	A	G	0.0183862	0.0853996	0.0114282	0.0112065	0.108	2.53e-14	-0.028791	0.013803	0.036996
rs186968338	A	G	-0.0236275	0.0536614	0.00973621	0.00956694	0.0152	2.03e-08	0.0018585	0.012094	0.87786
rs1870140	A	G	-0.0127029	-0.0069349	0.00226784	0.0022314	2.13e-08	0.00188	0.00017624	0.0031645	0.95559
rs187183066	G	A	0.067567	0.00493483	0.0104823	0.0103488	1.15e-10	0.633	-0.0062394	0.010873	0.56607
rs1871859	T	C	0.0184367	0.0113731	0.00241163	0.00237162	2.09e-14	1.62e-06	0.002002	0.0034904	0.56625
rs187285433	T	C	0.0163207	-0.137708	0.0104692	0.0102595	0.119	4.46e-41	0.02426	0.010767	0.024248
rs187429064	G	A	-0.133848	-0.154083	0.00854232	0.00843126	2.47e-55	1.3e-74	0.0037782	0.010357	0.71528
rs187767402	G	C	0.0659978	0.0112229	0.0113525	0.0110726	6.12e-09	0.311	-0.012188	0.012589	0.33297
rs1879797	G	A	-0.0102549	-0.00150731	0.00180262	0.00177209	1.28e-08	0.395	-0.00070069	0.0024231	0.77245
rs1883711	C	G	0.127743	0.0586475	0.00498287	0.00488405	5.99e-145	3.23e-33	-0.0071638	0.0066726	0.28299
rs1883783	T	G	-0.00564478	-0.0135406	0.00167904	0.00165201	0.000774	2.48e-16	0.0065489	0.0022988	0.0043889
rs188443112	A	G	-0.0938712	-0.0209558	0.0126329	0.0124222	1.08e-13	0.0916	-0.0018906	0.015408	0.90234
rs188521133	C	T	0.0565341	0.23389	0.0121306	0.0118375	3.16e-06	6.79e-87	-0.082595	0.017274	1.7413e-06
rs189149041	C	T	0.143739	0.0052336	0.01138	0.0111334	1.43e-36	0.638	0.01897	0.016177	0.24093
rs190338189	A	G	0.0189549	0.0523974	0.00860696	0.00844305	0.0276	5.44e-10	-0.021183	0.011592	0.067629
rs190513090	T	A	0.0716548	-0.00689522	0.012319	0.0120137	6.01e-09	0.566	0.0077982	0.016687	0.64027
rs190720101	C	T	-0.124176	-0.0120309	0.0190041	0.0185583	6.4e-11	0.517	-0.020957	0.025074	0.40328
rs191687831	A	G	0.0312588	-0.0965058	0.0167046	0.0165214	0.0613	5.18e-09	-0.0083218	0.023327	0.72128
rs191745558	G	A	0.0229021	0.0769858	0.0125495	0.0124071	0.068	5.47e-10	-0.037755	0.022142	0.088166
rs192325752	A	G	0.00519605	0.083582	0.00962797	0.00940295	0.589	6.17e-19	0.0040723	0.012017	0.73471
rs192436363	T	G	0.0725071	0.00891822	0.0112069	0.0109322	9.81e-11	0.415	0.0026066	0.010996	0.81262
rs193220	T	C	-0.00242642	-0.0106358	0.00178865	0.00175927	0.175	1.49e-09	0.0037352	0.0024495	0.12729
rs193248052	A	G	-0.103646	-0.00669226	0.0103701	0.0102058	1.61e-23	0.512	-0.015258	0.013807	0.26913
rs1966500	C	T	-0.00262668	-0.0145431	0.00169611	0.0016685	0.121	2.88e-18	0.0047703	0.0022995	0.038038
rs200756447	T	G	-0.0335211	0.0127807	0.00270936	0.00266368	3.69e-35	1.6e-06	-0.0030118	0.002433	0.21575
rs2011442	C	T	-0.0131892	-0.00744187	0.00176034	0.00173153	6.76e-14	1.72e-05	-0.0046298	0.0024095	0.054672
rs2023929	A	G	-0.0316151	-0.00615971	0.00260372	0.00255905	6.3e-34	0.0161	-0.0062661	0.0033919	0.064697
rs2034945	A	T	-0.0138832	-0.0113376	0.00208998	0.00205389	3.08e-11	3.39e-08	-0.0012057	0.0028338	0.67049
rs204480	T	C	-0.0424406	0.0122037	0.00201182	0.00194877	8.72e-99	3.79e-10	0.014285	0.0026177	4.8465e-08
rs207154	C	T	-0.0304288	0.000249964	0.00277786	0.00273321	6.35e-28	0.927	-0.0010953	0.0039737	0.78283
rs2075915	G	A	-0.00462981	0.0121215	0.0019085	0.00187604	0.0153	1.04e-10	-0.0015065	0.0026535	0.57021
rs2076310	G	A	0.00300889	0.0179373	0.00200271	0.00197577	0.133	1.1e-19	-0.0036962	0.0026458	0.1624
rs2076712	T	G	0.0112177	0.00353847	0.00176022	0.00173201	1.85e-10	0.0411	-0.0032906	0.0024353	0.17662
rs2182784	A	C	0.00334861	0.0129995	0.00201408	0.00197988	0.0964	5.18e-11	-0.0053571	0.0027367	0.050285
rs2235571	G	T	0.0194513	0.00417188	0.0032071	0.00315321	1.32e-09	0.186	-0.0020098	0.00436	0.64482
rs2242945	G	A	0.00517372	0.00990466	0.00173116	0.00170248	0.0028	5.96e-09	0.0025363	0.0023769	0.28595
rs2269341	T	C	0.0228462	0.00461968	0.00170526	0.00167862	6.25e-41	0.00592	0.0022962	0.0023251	0.32337
rs2279013	C	T	0.00259116	-0.0165842	0.00179028	0.00175827	0.148	4.02e-21	0.0074792	0.0024338	0.0021192
rs2298058	T	C	-0.00573999	0.0191	0.00176995	0.0017398	0.00118	4.86e-28	-0.0012759	0.0024752	0.60623
rs2298881	A	C	0.01637	-0.00368681	0.00264565	0.00260111	6.11e-10	0.156	-0.0013442	0.0037805	0.72217
rs2331428	G	A	0.0115758	0.0154429	0.00257112	0.00252903	6.72e-06	1.02e-09	0.0058383	0.0032741	0.074557
rs2374571	A	G	-0.0430325	-0.0112237	0.00541087	0.00530306	1.82e-15	0.0343	-0.0037141	0.007081	0.59992
rs240760	A	T	-0.011761	0.000343107	0.00191863	0.00188614	8.79e-10	0.856	0.00099853	0.0024278	0.68086
rs241056	A	G	-0.0112623	-0.00422725	0.00193135	0.00190034	5.5e-09	0.0261	0.0038474	0.0026526	0.14693
rs245479	A	G	0.00889163	0.0149327	0.00215373	0.00211792	3.65e-05	1.78e-12	-0.0057021	0.0030079	0.058
rs2458247	G	A	-0.00955341	-0.00264128	0.0016593	0.00163208	8.54e-09	0.106	-0.0017503	0.0023018	0.447
rs2461728	A	T	0.00372296	0.0105427	0.00189293	0.00186213	0.0492	1.5e-08	-0.002712	0.0025692	0.29115
rs2465956	C	T	0.0193021	-0.000218827	0.00208998	0.00205658	2.57e-20	0.915	0.0028713	0.0028918	0.32074
rs2479415	C	T	0.0344386	0.00383318	0.00175688	0.0017073	1.48e-85	0.0248	0.0013294	0.0022865	0.56097
rs2495477	G	A	-0.0540576	0.00288527	0.00178118	0.00174296	1e-200	0.0978	-0.004194	0.0023787	0.077878
rs2594205	A	G	0.0143611	0.00235454	0.00254242	0.00249886	1.62e-08	0.346	0.0047088	0.0035531	0.18508
rs2618566	G	T	0.0403986	-0.00568684	0.00180626	0.00176331	8.46e-111	0.00126	-0.00016563	0.0024047	0.94509
rs262695	G	A	0.00199778	0.0123194	0.0018761	0.0018461	0.287	2.5e-11	0.00076652	0.0024792	0.75718
rs2657880	C	G	-0.00163588	0.0127356	0.00215778	0.00212103	0.448	1.92e-09	0.0028605	0.0029425	0.33098
rs2715825	T	G	0.0100143	1.72757e-05	0.00183123	0.00181068	4.54e-08	0.992	-0.0026197	0.0024153	0.27808
rs2736600	T	C	-0.0139942	0.000983289	0.00168977	0.00165915	1.21e-16	0.553	-0.0073675	0.0023321	0.0015822
rs28167	T	C	0.00414153	0.0111092	0.00169293	0.0016659	0.0144	2.58e-11	-0.0039308	0.0023561	0.095245
rs28362459	C	A	0.0160116	0.00355307	0.00279367	0.00275048	9.96e-09	0.196	0.003726	0.0040151	0.35341
rs28364045	A	G	0.0145018	0.0809396	0.0104558	0.0102374	0.165	2.65e-15	0.015222	0.013145	0.24687
rs28375190	G	T	-0.0136847	-0.00901998	0.00232088	0.00228267	3.72e-09	7.77e-05	-0.0023359	0.0032232	0.46863
rs28378644	T	C	0.00353172	-0.0130645	0.0019397	0.00190784	0.0686	7.5e-12	0.0057421	0.0025868	0.026432
rs28399665	T	C	-0.427581	0.131516	0.0115787	0.011402	1e-200	8.84e-31	0.014899	0.018875	0.4299
rs28419182	G	A	-0.00289929	-0.0151396	0.00198666	0.00195434	0.144	9.43e-15	0.0074935	0.0027365	0.0061745
rs28497720	T	C	-0.0181272	0.00068892	0.00188483	0.00185433	6.75e-22	0.71	-0.005597	0.0026157	0.032372
rs2908298	A	G	0.00513581	0.0296658	0.00225076	0.0022157	0.0225	7.02e-41	-0.0073228	0.0031458	0.019924
rs2910439	G	T	-0.000561571	-0.0138349	0.00168789	0.00165504	0.739	6.31e-17	0.0071783	0.0022804	0.0016453
rs2965113	C	T	-0.0853912	0.00896328	0.0025835	0.00253903	1e-200	0.000415	0.014895	0.0036313	4.0982e-05
rs2970902	C	G	0.011941	0.00212278	0.00173745	0.00170919	6.3e-12	0.214	0.0024957	0.0024229	0.303
rs2972831	T	C	0.019181	0.0032774	0.00267946	0.00263897	8.15e-13	0.214	-0.00020156	0.0035702	0.95498
rs3001253	T	C	0.000907104	0.0132213	0.00180947	0.00177389	0.616	9.1e-14	-0.0059935	0.0023232	0.0098863
rs3005923	A	G	-0.10351	-0.016575	0.00947295	0.00933727	8.57e-28	0.0759	0.00054684	0.012904	0.9662
rs3007718	T	A	0.0106083	-0.00213596	0.00168349	0.00165685	2.95e-10	0.197	0.0040698	0.0023511	0.083445
rs3010277	G	A	-0.0173033	-0.00582524	0.00200805	0.00197655	6.88e-18	0.00321	0.0012749	0.0027957	0.64838
rs3120159	A	G	-0.00528009	-0.0101763	0.00170947	0.00168107	0.00201	1.42e-09	0.0025567	0.0023247	0.27143
rs312030	T	C	-0.0583246	-0.03201	0.00318801	0.00314295	9.07e-75	2.32e-24	0.024803	0.0042815	6.9112e-09
rs3136512	C	T	-0.00486699	-0.0160841	0.00171719	0.00168508	0.00459	1.36e-21	0.0080705	0.0022879	0.00041956
rs34019521	C	G	0.0185098	0.0037601	0.00194149	0.00191073	1.52e-21	0.0491	-0.0015844	0.0025978	0.54192
rs34061869	A	G	-0.0199154	-0.00724359	0.00331358	0.00325998	1.85e-09	0.0263	-0.0016953	0.0044145	0.70095
rs34068285	G	A	-0.00228059	0.0175282	0.00289788	0.00281055	0.431	4.47e-10	-0.0017621	0.0036224	0.62666
rs34280588	C	T	0.00576241	0.0112864	0.00190248	0.00186202	0.00245	1.35e-09	-0.0043295	0.0024073	0.072104
rs34460487	A	G	0.0153228	0.0136288	0.00178293	0.00174834	8.39e-18	6.43e-15	-0.00081589	0.002401	0.734
rs34503352	A	G	-0.0286724	-0.00720833	0.00225316	0.00221245	4.27e-37	0.00112	0.0014851	0.0031975	0.64232
rs34591748	G	C	0.000375667	-0.0113337	0.00209956	0.00206146	0.858	3.84e-08	0.0029351	0.0028885	0.30957
rs34707604	C	T	0.0300612	0.0173969	0.00232653	0.00226602	3.42e-38	1.62e-14	0.014487	0.0027355	1.1853e-07
rs34748066	G	A	-0.014105	-0.00147637	0.00174001	0.00170975	5.22e-16	0.388	0.0044033	0.0023631	0.062415
rs34795914	T	G	0.062562	-0.00521548	0.00559638	0.00548891	5.17e-29	0.342	0.0069553	0.007153	0.33088
rs34881821	A	C	-0.00252175	0.0195166	0.00255915	0.00251764	0.324	9.05e-15	-0.00038701	0.0034917	0.91175
rs35045030	T	C	-0.0768765	-0.0692603	0.00795191	0.00778992	4.14e-22	6.06e-19	-0.027481	0.01058	0.0093909
rs350885	A	C	-0.00549612	-0.0172516	0.00190202	0.00187275	0.00386	3.2e-20	-0.0050616	0.002621	0.053465
rs35375945	A	G	0.00179236	-0.0104933	0.00194884	0.00191886	0.358	4.54e-08	0.0014146	0.002679	0.59746
rs35665085	A	G	0.010467	0.0242505	0.00364016	0.00357131	0.00403	1.12e-11	0.00062821	0.0049397	0.8988
rs35784342	C	T	-0.00419613	-0.027553	0.00165272	0.00162625	0.0111	2.18e-64	0.0058837	0.0022797	0.0098543
rs36049922	C	T	0.0433914	0.00177147	0.00493382	0.004848	1.43e-18	0.715	0.012423	0.0057816	0.031663
rs36057372	G	T	0.0256745	0.0154865	0.00448762	0.0044249	1.06e-08	0.000466	0.00014513	0.0056108	0.97936
rs360804	A	G	-0.0220517	-0.00377838	0.00177875	0.00175022	2.7e-35	0.0309	0.0059888	0.0024791	0.015706
rs36218923	T	C	0.128587	-0.00112601	0.0151582	0.0149275	2.19e-17	0.94	-0.020287	0.017358	0.24252
rs362270	T	G	0.00719127	0.0138861	0.00185289	0.00182245	0.000104	2.55e-14	-0.0046267	0.0025041	0.064661
rs369719	G	A	0.0176942	0.00636804	0.00170733	0.00167394	3.63e-25	0.000142	-0.0053544	0.0023024	0.020042
rs3743531	G	C	-0.00440133	0.0268657	0.00492991	0.00483542	0.372	2.76e-08	-0.0076441	0.0068	0.26095
rs3744811	T	C	-0.0010343	-0.0123574	0.00203877	0.00200155	0.612	6.66e-10	-0.0014241	0.0027195	0.6005
rs3746778	A	G	-0.0125855	0.00343072	0.0019562	0.00190984	1.25e-10	0.0724	0.0033773	0.002367	0.15363
rs3751669	A	G	-0.00556225	-0.0161479	0.00228135	0.00224292	0.0148	6.04e-13	0.0056701	0.0029733	0.056519
rs3751973	A	T	-0.0192115	0.00401738	0.00335784	0.00329572	1.06e-08	0.223	-0.00015726	0.0047589	0.97364
rs3758199	C	T	0.0103547	0.0098242	0.00169354	0.00167838	9.7e-10	4.82e-09	-0.00034526	0.0022838	0.87984
rs3761701	T	C	0.00188061	0.0107724	0.00170284	0.00167549	0.269	1.28e-10	-0.0017415	0.0023506	0.45878
rs3780181	G	A	-0.0347918	0.00275237	0.00324511	0.00319327	8.09e-27	0.389	-0.010198	0.0045734	0.025753
rs3814058	C	T	0.0122989	0.00274112	0.00208981	0.00205569	3.98e-09	0.182	0.0030612	0.0030377	0.31359
rs3816339	T	A	0.0127835	-0.00211486	0.00195529	0.00194013	6.24e-11	0.276	0.0046727	0.0028416	0.10009
rs3843293	T	G	0.00156348	0.00896008	0.00162852	0.0016029	0.337	2.27e-08	-0.0018489	0.0022761	0.41663
rs3890746	C	T	-0.0100909	-0.0117307	0.0016486	0.00162239	9.31e-10	4.81e-13	0.0036668	0.0023016	0.11113
rs3950106	C	T	0.034446	0.0208926	0.00507932	0.00498162	1.19e-11	2.74e-05	-0.0053701	0.0062847	0.39284
rs3974807	T	C	0.000310329	0.0150904	0.00220422	0.00216101	0.888	2.89e-12	0.0010909	0.0029003	0.70682
rs41269133	C	T	-0.0248829	0.0084978	0.00287162	0.00282797	4.51e-18	0.00266	-0.01176	0.0041512	0.0046141
rs4148177	A	G	-0.0349277	-0.00974413	0.00164696	0.00162724	8.16e-100	2.12e-09	0.00059087	0.0022968	0.79698
rs414850	C	A	-0.0116462	-0.0107533	0.00170253	0.00167287	7.89e-12	1.29e-10	0.0011035	0.0022953	0.63067
rs419925	C	G	0.010899	-0.0284853	0.00182646	0.00180017	2.41e-09	2.14e-56	-0.00014301	0.0024791	0.954
rs4234798	T	G	-0.0099461	-0.00124326	0.00167231	0.00164554	2.72e-09	0.45	-0.00078623	0.0023387	0.73674
rs4239702	T	C	-0.010985	-0.00640446	0.00180945	0.00178058	1.27e-09	0.000322	-0.0030355	0.0025585	0.23545
rs4294187	G	A	0.00425086	-0.010679	0.00188608	0.00185558	0.0242	8.66e-09	0.0034747	0.0026082	0.18279
rs4352308	C	T	-0.00607186	-0.0121994	0.00181891	0.00179574	0.000843	1.09e-11	0.0048243	0.0024896	0.052653
rs435612	A	G	-0.0222139	-0.00646588	0.00292349	0.00287437	3e-14	0.0245	-0.0021002	0.0041107	0.60942
rs4366770	T	C	-0.00488344	-0.00990515	0.00176979	0.00173518	0.00579	1.14e-08	0.0018911	0.0024408	0.43848
rs4457349	G	A	-0.0365328	-0.0312108	0.00471797	0.0046338	9.68e-15	1.63e-11	-0.0059556	0.007163	0.40573
rs4465	C	T	0.0144045	0.00368586	0.00172435	0.00169503	6.62e-17	0.0297	0.005803	0.0023938	0.015342
rs4485425	A	G	-0.019129	-0.0086531	0.00182893	0.00179933	1.33e-25	1.52e-06	0.0073606	0.0025316	0.0036442
rs4545126	A	G	0.0153411	0.0363945	0.00210715	0.00207061	3.33e-13	3.72e-69	-0.016172	0.002943	3.9103e-08
rs45508991	T	C	0.100184	0.00753985	0.0084398	0.00825775	1.69e-32	0.361	0.0055206	0.01237	0.6554
rs4599176	T	G	0.0122146	0.00409941	0.00194328	0.00190909	3.27e-10	0.0318	0.0042149	0.002588	0.10339
rs4635554	G	T	0.0667384	0.0270293	0.00174099	0.00171233	1e-200	3.94e-56	-0.010458	0.0024086	1.4135e-05
rs4639966	C	T	0.0151284	-0.000631424	0.00190311	0.00187106	1.88e-15	0.736	0.007455	0.0026734	0.0052938
rs4699993	G	A	0.00178693	0.0106156	0.00166026	0.00163277	0.282	7.95e-11	-0.0038726	0.0023038	0.092776
rs4714431	C	A	0.00985327	0.00336935	0.00174307	0.00171446	1.58e-08	0.0494	0.0023287	0.0023507	0.32187
rs4716017	C	T	0.0127856	0.00139784	0.00173562	0.00170592	1.75e-13	0.413	-0.0026667	0.0023453	0.25551
rs4722033	G	A	-0.0168832	-0.001436	0.00169457	0.00166693	2.21e-23	0.389	-0.00269	0.0023418	0.25069
rs4722551	C	T	0.038473	-0.024966	0.00218596	0.00215212	2.46e-69	4.09e-31	0.013199	0.0031207	2.3418e-05
rs4760388	T	C	-0.00997132	-0.00477276	0.00164957	0.00162187	1.5e-09	0.00325	0.0033648	0.0022808	0.14014
rs4768657	T	C	0.00378181	0.0130106	0.00164983	0.00162305	0.0219	1.09e-15	0.0037388	0.0022889	0.10237
rs4780401	G	T	-0.00149228	-0.0106849	0.00170795	0.00167763	0.382	1.9e-10	-0.0028952	0.0023287	0.21377
rs4792904	C	T	0.000922646	0.0251176	0.00400244	0.0039428	0.818	1.88e-10	-0.00015476	0.0055096	0.97759
rs4803525	A	G	0.0104066	-0.00108292	0.00166925	0.00164817	4.54e-10	0.511	0.00074792	0.0023158	0.74673
rs4804414	T	C	0.00281716	0.0215045	0.00165128	0.00162476	0.088	5.47e-40	-0.013435	0.0023	5.189e-09
rs481113	T	A	0.0116904	0.00425388	0.0017014	0.00167094	6.37e-12	0.0109	-0.0010163	0.002336	0.66351
rs4822458	C	T	-0.000788006	0.0117979	0.00168326	0.00165263	0.64	9.41e-13	0.0037268	0.0022889	0.10348
rs4918433	C	T	0.00970635	0.0108355	0.00166616	0.00163854	5.69e-09	3.77e-11	-0.0030332	0.0022997	0.18719
rs4923543	A	G	-0.00140392	-0.0107528	0.00176015	0.00173013	0.425	5.13e-10	0.0040684	0.0024397	0.095399
rs4964757	T	C	0.014075	0.0110658	0.00179963	0.00176997	5.24e-15	4.05e-10	-0.0071835	0.0025049	0.004134
rs4965894	C	T	-0.00795105	0.00942995	0.00170712	0.00167	3.2e-06	1.64e-08	0.0019441	0.0023263	0.40333
rs4970744	C	T	0.0116356	-0.00118439	0.00166828	0.00164882	3.07e-12	0.473	-0.0034945	0.0023139	0.13099
rs4970829	A	G	-0.11002	-0.00555961	0.00317818	0.00312568	1e-200	0.0753	0.013939	0.0044078	0.0015651
rs498372	G	T	-0.0130736	-0.000985675	0.00206028	0.00202573	2.22e-10	0.627	0.0018827	0.0028427	0.5078
rs5004102	C	A	-0.00329323	-0.00946472	0.00164812	0.00162137	0.0457	5.3e-09	0.0030147	0.0022898	0.18799
rs5030873	C	T	0.00511304	0.0129028	0.00176691	0.00174045	0.00381	1.23e-13	-0.0057776	0.0024659	0.019128
rs513533	G	A	0.0223626	0.124243	0.00266001	0.00260982	4.21e-17	1e-200	-0.047459	0.0037805	3.8682e-36
rs528072831	C	T	0.018536	-0.0725642	0.013013	0.012682	0.154	1.05e-08	-0.005577	0.013422	0.67777
rs533427135	T	C	0.00383837	0.080348	0.0121526	0.0119582	0.752	1.83e-11	-0.019005	0.013976	0.17389
rs541786053	A	G	-0.0298496	-0.00881765	0.00545306	0.00532548	4.4e-08	0.0978	0.0035356	0.0066269	0.59368
rs545059597	G	T	0.00136828	0.0209558	0.00360057	0.00353075	0.704	2.93e-09	-0.0083379	0.0037999	0.028219
rs553427	C	T	-0.0382805	-0.00844531	0.00166868	0.00164128	1.83e-116	2.67e-07	-0.017336	0.0022803	2.9125e-14
rs55681439	T	G	-0.0166808	-0.0299152	0.00309606	0.0030431	7.13e-08	8.32e-23	0.016483	0.0044838	0.00023673
rs55696093	G	A	0.0384037	0.0135156	0.00202693	0.00199427	4.7e-80	1.23e-11	-0.0026916	0.0027513	0.32792
rs55712418	A	G	-0.00102406	0.0100221	0.00166204	0.00163472	0.538	8.75e-10	-0.0033958	0.0022824	0.13679
rs55714927	T	C	-0.0352417	-0.0104309	0.00219692	0.00214994	6.56e-58	1.22e-06	0.0037044	0.0028887	0.19971
rs55723005	T	C	0.036117	0.0121905	0.00308448	0.00303194	1.14e-31	5.8e-05	-0.013355	0.0041525	0.001299
rs55726838	A	G	0.0700933	-0.00128969	0.00923467	0.00905338	3.19e-14	0.887	0.016084	0.011329	0.15571
rs55774284	G	C	-0.00931557	-0.0258836	0.00203863	0.0020113	4.89e-06	6.72e-38	0.014305	0.0027518	2.0095e-07
rs55792959	T	C	-0.0984272	-0.015119	0.0132254	0.0130951	9.9e-14	0.248	-0.026042	0.015341	0.089592
rs55921103	G	T	-0.0110923	-0.00543631	0.00175084	0.00172195	2.37e-10	0.00159	-0.00014194	0.0024057	0.95295
rs56017239	G	A	0.0189857	0.0275206	0.00500643	0.00491858	0.000149	2.2e-08	-0.0058829	0.0061014	0.33495
rs56113850	T	C	-0.0131627	0.00262867	0.00180829	0.00177314	3.36e-13	0.138	0.0050149	0.0023036	0.029484
rs56118251	G	A	0.0154151	0.000873271	0.00223279	0.00219643	5.06e-12	0.691	0.00092089	0.0030946	0.76602
rs561797536	T	G	0.0898942	0.00334453	0.0105418	0.0103097	1.5e-17	0.746	-0.0050445	0.015004	0.7367
rs56202412	A	T	-0.0258081	-0.0300332	0.00344501	0.00339246	6.81e-14	8.53e-19	-0.0018456	0.0041299	0.65496
rs56223611	A	C	-0.0144801	0.000980951	0.00234893	0.00230818	7.07e-10	0.671	-0.0054669	0.003275	0.095057
rs56266464	A	G	-0.109414	-0.0136659	0.00342642	0.0033771	1e-200	5.2e-05	-0.0048633	0.0047971	0.31067
rs56294298	A	G	-0.0185192	-0.0192483	0.00313626	0.00307656	3.53e-09	3.94e-10	0.0037266	0.0041253	0.36633
rs56300212	A	G	-0.0127974	-0.00661585	0.00173139	0.00169989	1.45e-13	9.95e-05	0.0052989	0.0022822	0.020243
rs56324302	G	C	-0.0478906	-0.00435875	0.00613685	0.00601213	6.01e-15	0.468	-0.014492	0.0071299	0.04209
rs563915489	G	C	0.0859843	0.0200229	0.0129538	0.0126896	3.18e-11	0.115	-0.028113	0.01342	0.03619
rs56832849	T	C	0.0387498	0.0144496	0.00223785	0.00220211	3.59e-67	5.32e-11	-0.0030227	0.0030214	0.31711
rs571566475	A	G	0.0483292	0.0614058	0.0112463	0.0110404	1.73e-05	2.67e-08	-0.020351	0.017719	0.25074
rs57190680	A	C	0.000651215	-0.0104588	0.00183639	0.00180644	0.723	7.05e-09	0.00311	0.0025667	0.22564
rs57210159	A	G	-0.0135643	0.000871951	0.00240077	0.0023603	1.6e-08	0.712	-0.0045623	0.002609	0.080353
rs57314858	T	C	0.000269361	0.00928256	0.00168921	0.00166237	0.873	2.35e-08	-0.0023648	0.0023238	0.30884
rs574070471	G	A	-0.337536	0.100683	0.00962201	0.00944116	1e-200	1.5e-26	0.025154	0.011307	0.026105
rs5746498	C	T	0.0139188	-0.0012574	0.00202718	0.00199055	6.6e-12	0.528	0.00278	0.0027034	0.3038
rs57596493	T	C	-0.0134788	-0.00433582	0.00189918	0.00186679	1.27e-12	0.0202	0.0025479	0.0026673	0.33946
rs58336089	T	G	0.0143879	0.00149909	0.00229185	0.00225264	3.43e-10	0.506	0.0054497	0.0032051	0.089069
rs58440073	A	G	0.0146508	0.0747651	0.00865876	0.00847511	0.0906	1.13e-18	-0.027948	0.011725	0.017142
rs58895965	A	C	0.000625102	0.0219671	0.00221257	0.00217722	0.778	6.15e-24	-0.0075043	0.00299	0.012081
rs591789	T	C	0.0301145	0.000789509	0.00271451	0.00267184	1.34e-28	0.768	-0.0084033	0.0038428	0.028759
rs5926	T	C	-0.176353	0.0155461	0.0176778	0.0171863	1.94e-23	0.366	0.0030893	0.03066	0.91974
rs59408219	C	T	-0.0182595	-0.0100326	0.00314806	0.00309127	6.62e-09	0.00117	-0.0013759	0.0041849	0.74232
rs6018185	T	C	-0.00158758	-0.0121147	0.00169131	0.00166348	0.348	3.27e-13	0.0056121	0.0023323	0.016118
rs6022851	T	C	0.011079	0.0072287	0.00168807	0.00165763	5.27e-11	1.3e-05	0.0013974	0.0023058	0.54447
rs6028974	C	T	0.0143754	0.00904215	0.0019385	0.00190566	1.21e-13	2.09e-06	-0.00028177	0.0025002	0.91027
rs6029126	T	G	-0.0120476	-0.0109389	0.00201685	0.00198082	2.32e-09	3.34e-08	0.00036814	0.0027445	0.89329
rs6085202	A	G	0.0124321	0.00574329	0.00167123	0.00164322	1.02e-13	0.000474	-4.8045e-05	0.0023143	0.98344
rs6090046	G	T	-0.0100698	-0.0110315	0.00174797	0.0017268	8.37e-09	1.68e-10	0.0036495	0.0022787	0.10924
rs60915609	T	G	-0.0152406	-0.00119449	0.00227289	0.00223586	2.01e-11	0.593	-0.00037114	0.0030803	0.9041
rs6129760	G	A	0.0276423	0.0166181	0.00176614	0.00173821	3.26e-55	1.17e-21	-0.0017715	0.0024384	0.46752
rs617314	A	C	-0.102737	-0.00538957	0.00617647	0.00608806	3.98e-62	0.376	-0.0058934	0.0085514	0.49072
rs61735385	C	G	-0.0146799	-0.00176168	0.00267038	0.00262572	3.86e-08	0.502	-0.0013939	0.0036269	0.70074
rs61754230	T	C	0.0420225	0.0226298	0.00727012	0.00715357	7.46e-09	0.00156	-0.0051418	0.0081423	0.52772
rs61761209	T	C	0.0495966	0.000987719	0.00417148	0.0040979	1.34e-32	0.81	-0.018574	0.0055137	0.00075545
rs61771892	T	C	-0.00379706	-0.0137756	0.00242416	0.00238117	0.117	7.24e-09	0.0030225	0.003096	0.32893
rs61788121	T	G	-0.0376715	-0.00308985	0.00659598	0.00647596	1.12e-08	0.633	0.00083419	0.0071584	0.90723
rs61821645	G	A	-0.00529677	0.0374571	0.00673442	0.00665735	0.432	1.84e-08	-0.0098385	0.0074367	0.18585
rs61887111	T	A	-0.00105277	-0.0106754	0.00186529	0.00183279	0.572	5.72e-09	0.0037772	0.0024788	0.12756
rs61900203	G	A	0.00183261	0.014203	0.00254091	0.00249351	0.471	1.23e-08	-0.0039758	0.0031297	0.20396
rs61905269	A	G	-0.00297703	-0.0191372	0.00225084	0.0022127	0.186	5.2e-18	0.0090796	0.0031184	0.0035959
rs61906076	G	C	0.02154	0.13262	0.00375556	0.00368695	9.72e-09	1e-200	-0.045833	0.0051373	4.6243e-19
rs61937853	G	A	-0.000108574	0.0136726	0.00241312	0.00236956	0.964	7.92e-09	-0.00092416	0.0032461	0.77587
rs62017272	C	T	0.00766476	0.0111262	0.00206458	0.00202699	0.000205	4.04e-08	0.0034378	0.0029269	0.24017
rs62093946	C	T	0.0237876	0.0745711	0.0131131	0.0128165	0.0697	5.94e-09	0.0097497	0.021467	0.64971
rs62111294	T	C	0.0138742	0.00358999	0.00182572	0.00178515	2.98e-14	0.0443	0.0027594	0.0023192	0.23413
rs62118205	A	G	0.0244462	-0.0012285	0.00245222	0.00239536	2.08e-23	0.608	-0.0013973	0.0032158	0.66392
rs62119267	C	A	-0.232667	0.0530944	0.00592446	0.00584061	1e-200	9.85e-20	0.039275	0.0077456	3.9681e-07
rs62129968	A	C	0.00246793	-0.0161559	0.0022538	0.00221579	0.274	3.07e-13	-0.006096	0.0030662	0.046794
rs62131697	T	C	0.0647958	0.00926333	0.0102096	0.0100003	2.2e-10	0.354	0.0071252	0.012037	0.55388
rs62139105	G	A	0.00650101	0.0452352	0.00478062	0.0046945	0.174	5.65e-22	-0.00020764	0.0068767	0.97591
rs621907	T	C	-0.0185368	0.0123718	0.00305357	0.00300518	1.27e-09	3.84e-05	0.002874	0.0042251	0.49637
rs62419249	A	G	0.0127847	-0.00074668	0.00166363	0.00163668	1.53e-14	0.648	0.0032367	0.0022821	0.1561
rs62440924	G	A	-0.0127044	-0.00453916	0.00224059	0.00220283	1.43e-08	0.0393	0.0038594	0.003061	0.20737
rs62441842	G	A	0.0211488	0.00835987	0.00217655	0.00214201	2.56e-22	9.51e-05	0.0024779	0.0029735	0.40466
rs62483619	T	C	0.013259	-0.0118521	0.00198983	0.00195656	2.68e-11	1.38e-09	-0.00075629	0.0026879	0.77843
rs62509311	T	A	-0.0151074	-0.00233629	0.00185334	0.00182266	3.6e-16	0.2	0.0035206	0.0025293	0.16396
rs62523860	A	G	-0.0488093	-0.0904279	0.0079327	0.00773419	7.61e-10	1.4e-31	0.028976	0.0074356	9.742e-05
rs633867	T	C	0.013117	0.0535624	0.00541711	0.00532555	0.0155	8.5e-24	-0.0080555	0.0094552	0.39424
rs634044	C	T	-0.00854451	-0.0366686	0.00200111	0.00196739	1.96e-05	1.57e-77	0.010939	0.0027425	6.6428e-05
rs640306	T	C	0.011167	-0.00028198	0.00174516	0.00171751	1.57e-10	0.87	-0.00069577	0.0024149	0.77326
rs6453188	G	A	0.017551	0.00195315	0.00190956	0.00187787	3.89e-20	0.298	0.004938	0.0025898	0.056555
rs6455682	A	G	-0.0277644	0.0029375	0.00297348	0.00291956	9.88e-21	0.314	0.002113	0.0041164	0.60773
rs6458949	T	G	0.0132399	0.00703997	0.00186619	0.0018353	1.3e-12	0.000125	0.0013221	0.0025771	0.60793
rs6511721	G	A	0.0594179	-0.00131466	0.00174182	0.00168803	1e-200	0.436	-0.0013603	0.0022784	0.55047
rs6599389	A	G	0.000795294	0.0216518	0.00323538	0.00318182	0.806	1.01e-11	-0.0082621	0.0043967	0.060224
rs662138	G	C	0.0391848	0.00748527	0.002154	0.00212001	6.01e-74	0.000414	-0.0018686	0.0029141	0.52138
rs6670347	C	T	-0.114964	-0.00771356	0.00418379	0.00412353	3.18e-166	0.0614	0.032553	0.0057779	1.7623e-08
rs66731238	A	G	-0.00271358	-0.0283477	0.00336728	0.00327564	0.42	4.97e-18	0.0015725	0.003618	0.66383
rs66807996	T	A	0.0564638	-0.00470248	0.00866055	0.00845154	7.05e-11	0.578	0.003094	0.011469	0.78735
rs6685829	T	C	-0.0106222	0.0014258	0.00168642	0.00166116	3e-10	0.391	0.0029705	0.0022806	0.19274
rs6756743	T	C	0.0491343	0.0217776	0.00397426	0.00390064	4.14e-35	2.36e-08	0.000993	0.0053955	0.85398
rs6761337	C	T	-0.010105	0.000542832	0.00179604	0.00176826	1.84e-08	0.759	-0.0030306	0.0024524	0.21655
rs6762098	C	A	-0.0105401	-0.00276095	0.00173025	0.00170231	1.12e-09	0.105	-0.0027245	0.0023792	0.25214
rs67734975	G	C	0.052144	0.00886338	0.00392719	0.00386039	3.12e-40	0.0217	-0.0022194	0.005353	0.67843
rs6787781	C	G	0.0101112	0.0140916	0.00188271	0.00185142	7.85e-08	2.71e-14	-0.0057517	0.0025569	0.024481
rs67890964	C	T	-0.0188852	-0.00475938	0.00176106	0.00173349	7.87e-27	0.00604	0.00095523	0.0023549	0.68501
rs6792725	A	G	0.0159966	0.0148501	0.0018504	0.00182366	5.38e-18	3.86e-16	-0.0020473	0.0025444	0.42104
rs6897249	C	T	-0.0110797	-0.0117326	0.00166378	0.00163693	2.75e-11	7.64e-13	-0.0020579	0.0022915	0.36917
rs6916293	A	C	0.012335	0.00688003	0.00192884	0.00188816	1.61e-10	0.000269	0.0055868	0.0023178	0.015935
rs6934083	T	C	0.0154534	0.0264192	0.00441423	0.00434508	0.000464	1.2e-09	0.0063362	0.0064377	0.325
rs6966722	A	G	-0.000909543	0.0184034	0.00338474	0.00331907	0.788	2.94e-08	-0.0016432	0.0039678	0.67878
rs6967728	A	G	-0.0160004	-0.010025	0.00219311	0.00215539	2.97e-13	3.3e-06	0.0032883	0.0029288	0.26155
rs6987702	C	T	0.0315586	0.0214272	0.00182188	0.001793	3.21e-67	6.46e-33	0.002078	0.0025677	0.41835
rs6998881	C	T	0.00708876	0.0124012	0.00198019	0.00194786	0.000344	1.93e-10	-0.0039531	0.0027826	0.15542
rs7001295	C	T	-0.00214352	-0.0676957	0.00260331	0.00254927	0.41	2.25e-155	0.052279	0.0032338	9.1874e-59
rs7003404	T	C	-0.000625684	0.0125912	0.00201084	0.00198	0.756	2.03e-10	-0.0038548	0.002721	0.15657
rs7011442	T	C	-0.00544928	-0.0123071	0.00180071	0.00177348	0.00248	3.93e-12	0.003952	0.0023152	0.087826
rs7014389	A	T	-0.00274674	0.0173145	0.00241072	0.0023704	0.255	2.78e-13	-0.0027981	0.0034008	0.41064
rs701844	G	A	0.0032508	-0.0125985	0.0016784	0.00164919	0.0528	2.19e-14	0.0059469	0.0022873	0.0093233
rs7022699	G	A	-0.0048416	-0.00916384	0.00166824	0.00164022	0.00371	2.31e-08	-0.0015224	0.0022915	0.50646
rs7031621	A	G	-0.0104995	-0.00954977	0.00168324	0.0016578	4.44e-10	8.39e-09	-8.0003e-06	0.0022763	0.9972
rs704	A	G	0.0203617	-0.0112457	0.00163975	0.00161198	2.1e-35	3.03e-12	-0.011021	0.0022775	1.3056e-06
rs7043344	C	T	-0.00954036	-0.00321141	0.00169339	0.00166679	1.76e-08	0.054	-0.002495	0.0023787	0.29424
rs7046887	T	C	0.013191	0.00521011	0.00164661	0.00162024	1.14e-15	0.0013	0.0031247	0.0022896	0.17234
rs71311871	G	A	-0.0363035	-0.0063294	0.00297194	0.00292601	2.57e-34	0.0305	-0.007999	0.0041479	0.053803
rs71368856	T	C	0.00495093	0.0225931	0.00268312	0.0026381	0.065	1.09e-17	-0.011562	0.0035816	0.0012465
rs71420065	C	T	-0.0167492	-0.00428727	0.00290422	0.00285214	8.06e-09	0.133	-0.0010557	0.0039338	0.78842
rs71443003	A	G	-0.0149526	-0.0431186	0.00308594	0.00303262	1.26e-06	7.06e-46	-0.0056789	0.0039588	0.15143
rs71503752	C	T	-0.00575899	-0.0121782	0.00225107	0.00220052	0.0105	3.13e-08	0.0033607	0.0025411	0.18599
rs715332	C	T	-0.0117084	-0.00604113	0.00191706	0.0018867	1.01e-09	0.00136	0.00061838	0.0026075	0.81254
rs7169797	G	A	-0.0208661	-0.00562412	0.00376574	0.00369478	3.01e-08	0.128	-0.0034443	0.0037909	0.36359
rs7245405	T	C	-0.0250972	-0.0181734	0.00377584	0.00370652	3e-11	9.43e-07	-0.0065959	0.0054004	0.22195
rs7257095	G	C	-0.231849	0.0919757	0.0108805	0.0107392	9.43e-101	1.09e-17	0.014116	0.014902	0.34351
rs72616903	C	T	0.0193895	0.0140339	0.00223565	0.00219856	4.21e-18	1.73e-10	-0.0042169	0.0030919	0.17262
rs7264079	C	G	-0.0286252	-0.0174204	0.002366	0.00232664	1.07e-33	7.03e-14	-0.011759	0.0033048	0.00037373
rs72647039	T	C	0.0365365	0.0142196	0.0060332	0.00591697	1.4e-09	0.0163	0.0048209	0.0080431	0.54891
rs72647321	T	C	0.0267206	0.047897	0.00617899	0.00606532	1.53e-05	2.86e-15	-0.016117	0.0080953	0.046491
rs72647819	T	C	0.0341871	0.00823128	0.00603719	0.00597316	1.49e-08	0.168	-0.0036464	0.0073768	0.62109
rs72749499	G	A	0.0253395	0.0300391	0.00333399	0.00326957	2.95e-14	4.02e-20	-0.0085306	0.004395	0.052261
rs72749502	T	A	0.0253118	0.030137	0.00333816	0.00327388	3.39e-14	3.41e-20	-0.0085986	0.004395	0.050414
rs72754127	A	G	-0.00138225	-0.0191177	0.00295828	0.00290522	0.64	4.69e-11	0.0074647	0.0041572	0.072555
rs72768400	T	G	-0.0344876	0.000137034	0.00487568	0.00476623	1.51e-12	0.977	-0.0059333	0.0052484	0.25826
rs72772042	A	C	-0.0130985	0.00569373	0.00231391	0.00227422	1.51e-08	0.0123	0.00047188	0.0031972	0.88267
rs72783298	T	C	0.0134909	0.00625646	0.00239255	0.00235353	1.71e-08	0.00785	0.003393	0.003124	0.27744
rs72808082	T	C	0.00200451	-0.0432361	0.00601663	0.00589148	0.739	2.16e-13	0.016945	0.0076524	0.026808
rs72885907	A	G	0.00115751	-0.010648	0.00172133	0.00169007	0.501	2.97e-10	-0.00014667	0.0023758	0.95077
rs72916323	A	G	-0.019511	-0.00301432	0.00317279	0.00311658	7.77e-10	0.333	-0.00061247	0.0042706	0.88596
rs72983207	T	A	-0.0408888	0.00366816	0.00683917	0.00670297	2.25e-09	0.584	-0.0064377	0.0085845	0.4533
rs73009178	A	C	-0.00546433	-0.0309177	0.00264653	0.00259822	0.0389	1.19e-32	0.0097158	0.0034543	0.0049133
rs73017544	A	G	-0.039302	-0.0176918	0.00517045	0.0050881	2.93e-14	0.000507	0.015969	0.0064457	0.013234
rs73048314	T	A	-0.0677875	0.0381059	0.00623441	0.00610009	1.55e-27	4.19e-10	0.014979	0.0074172	0.043437
rs7307895	C	A	0.00324638	0.0116587	0.00165932	0.00163306	0.0504	9.39e-13	-0.0044033	0.0023027	0.055851
rs73138819	A	G	0.0287709	-0.106666	0.0105822	0.0103883	0.00655	9.83e-25	0.017973	0.012304	0.14407
rs73147887	G	C	0.0146459	0.00369614	0.00216428	0.00213726	1.31e-11	0.0837	-0.0004427	0.0027658	0.87283
rs73204260	A	G	0.0189305	-0.00698957	0.00264202	0.00260313	7.77e-13	0.00725	0.0079022	0.0035775	0.027186
rs7327867	G	A	0.0192627	0.00499511	0.00165184	0.00162455	2.01e-31	0.00211	0.00024647	0.0022799	0.91391
rs73366943	G	A	-0.00509601	-0.038256	0.00555676	0.00546751	0.359	2.62e-12	0.016752	0.0077404	0.030449
rs73568038	C	G	0.0208736	-0.00168683	0.00367733	0.00360667	1.38e-08	0.64	-0.0043147	0.0050572	0.39356
rs73667472	C	T	-0.00332664	-0.0167452	0.00312334	0.0030712	0.287	4.97e-08	0.00011354	0.0041912	0.97839
rs740516	G	C	-0.0469057	-0.00144009	0.00229806	0.00225846	1.34e-92	0.524	0.0048002	0.0032011	0.13373
rs74180170	C	T	-0.036836	-0.00907277	0.00196762	0.00189588	3.33e-78	1.71e-06	0.011685	0.0025114	3.2756e-06
rs742493	C	T	-0.00856606	-0.0181079	0.00252025	0.00248005	0.000677	2.85e-13	0.0063499	0.00361	0.078583
rs74372902	A	C	0.0541405	0.00816134	0.00731141	0.00718949	1.31e-13	0.256	0.0093521	0.0089752	0.29742
rs74442378	A	G	-0.0322539	-0.0376829	0.00466608	0.00459554	4.76e-12	2.41e-16	-0.010716	0.0063482	0.091401
rs74563318	A	C	-0.0141931	-0.0447511	0.00478653	0.00470227	0.00302	1.78e-21	0.00083098	0.0061996	0.89337
rs74662103	C	A	0.0188918	0.010799	0.00334254	0.00328446	1.59e-08	0.00101	-0.0066374	0.0046471	0.15321
rs74767666	A	G	-0.0100066	-0.0309647	0.00467847	0.00459703	0.0324	1.63e-11	0.0049298	0.0070341	0.4834
rs74773964	C	T	0.00770042	-0.045384	0.00623475	0.0061224	0.217	1.24e-13	-0.0012681	0.0082207	0.87741
rs74845072	A	C	0.03938	0.00122234	0.00439631	0.00432823	3.32e-19	0.778	-0.0075743	0.005792	0.19097
rs74882615	T	C	-0.0368965	-0.0641144	0.0109461	0.0107783	0.00075	2.71e-09	-0.01153	0.012263	0.3471
rs75033371	T	A	0.00341789	-0.04339	0.00626975	0.00615544	0.586	1.8e-12	-0.0095436	0.0071648	0.18286
rs7512552	T	C	-0.0111866	0.00204859	0.00165561	0.00162914	1.41e-11	0.209	0.00018161	0.0022774	0.93644
rs75164422	A	G	-0.034376	-0.0340064	0.0047487	0.00466444	4.52e-13	3.09e-13	0.012655	0.0068562	0.064931
rs7525503	T	G	0.0647782	0.0109294	0.00580894	0.00568333	7.04e-29	0.0545	0.0034844	0.0084301	0.67937
rs755407	T	C	0.00429609	0.0117606	0.00185204	0.00182158	0.0204	1.07e-10	-0.0049713	0.0025845	0.054418
rs75542613	A	G	-0.0282311	-0.0582699	0.00332597	0.00326162	2.1e-17	2.2e-71	-0.0076099	0.0045356	0.093382
rs7560093	A	C	-0.0222264	0.0048386	0.00395904	0.00388511	1.98e-08	0.213	0.007895	0.0052557	0.13306
rs7573769	G	A	-0.0180994	-0.00758914	0.00214734	0.00211286	3.49e-17	0.000328	0.0059455	0.0030556	0.051684
rs7590687	T	C	0.0544221	0.0109473	0.00345454	0.00339464	6.47e-56	0.00126	0.0076139	0.0043744	0.081761
rs75907879	T	C	0.0200726	-0.00142207	0.0026267	0.00257607	2.14e-14	0.581	0.0090981	0.0034316	0.0080193
rs75927231	A	G	-0.0151663	-0.0200448	0.00341261	0.0033596	8.82e-06	2.43e-09	0.0067166	0.0044857	0.13431
rs75941857	A	G	0.015231	0.0723103	0.00909552	0.00895298	0.094	6.66e-16	0.0052369	0.012715	0.68045
rs7612222	T	G	-0.0662536	0.0255801	0.0121407	0.0118898	4.84e-08	0.0314	-0.0043993	0.012526	0.72544
rs76324938	A	G	0.0289608	-0.00284982	0.00473354	0.00466906	9.46e-10	0.542	0.010403	0.0057502	0.070422
rs76732693	A	G	-0.00386039	-0.014152	0.00247795	0.00243985	0.119	6.62e-09	0.0048039	0.0033703	0.15405
rs76771178	C	G	-0.00392948	-0.0240373	0.00344217	0.00338993	0.254	1.33e-12	-0.0052616	0.0039885	0.18711
rs769451	G	T	-0.00227827	-0.0784602	0.0111458	0.0109494	0.838	7.74e-13	0.007025	0.013965	0.61494
rs76964330	G	A	0.0140839	0.0464008	0.00577343	0.00567779	0.0147	3.02e-16	0.00099921	0.0076673	0.89631
rs76970536	A	G	0.058869	0.0111622	0.0031369	0.00308362	1.42e-78	0.000295	-0.020394	0.0044085	3.728e-06
rs76989105	C	G	-0.0897298	0.028638	0.00772703	0.00756923	3.56e-31	0.000155	0.0125	0.010483	0.2331
rs77054368	A	G	-0.0266721	1.38157e-05	0.00433826	0.00425771	7.84e-10	0.997	-0.0018034	0.0053307	0.73513
rs7720984	A	G	-0.00904272	-0.0102153	0.00187687	0.00184726	1.45e-06	3.2e-08	0.003046	0.0025569	0.23355
rs7746081	A	G	-0.0310815	0.00101858	0.00173739	0.00170983	1.42e-71	0.551	0.0016616	0.0024849	0.5037
rs77480718	G	A	-0.0303623	-0.0189467	0.00346877	0.0034145	2.08e-18	2.87e-08	-0.0018802	0.0046751	0.68756
rs77860716	G	A	0.0225834	0.0132312	0.00405209	0.00398374	2.5e-08	0.000896	0.0051262	0.0049518	0.30057
rs7786102	G	A	-0.0227303	0.0211758	0.00182635	0.00179615	1.47e-35	4.42e-32	-0.011296	0.0026208	1.6333e-05
rs77906287	A	G	-0.00671238	-0.0291381	0.00478208	0.00471802	0.16	6.58e-10	-0.0017524	0.0059545	0.76852
rs78073763	G	T	-0.0353772	-0.00217455	0.00327005	0.00320406	2.81e-27	0.497	0.013934	0.0040175	0.00052386
rs7807404	C	T	-0.022496	0.0120075	0.00292952	0.00288014	1.6e-14	3.06e-05	-0.0061378	0.0041935	0.1433
rs7807870	T	C	-0.00119272	0.0221531	0.00180205	0.00177414	0.508	8.83e-36	-0.0081299	0.0024003	0.00070673
rs78198921	G	C	0.0137614	0.0393369	0.0070437	0.0069393	0.0507	1.44e-08	-0.0086981	0.0094045	0.35503
rs7826246	G	A	0.0116787	0.0245714	0.00341819	0.00329941	0.000634	9.53e-14	-0.0062517	0.0041728	0.13408
rs78309295	G	A	0.0223076	0.0685888	0.00609925	0.0059834	0.000255	2.02e-30	-0.037178	0.0076518	1.1821e-06
rs78336107	G	C	0.0162785	0.00203917	0.00261227	0.00256716	4.62e-10	0.427	-0.0036831	0.0037827	0.33022
rs78368482	C	G	-0.0490999	-0.00407024	0.00633748	0.00624179	9.37e-15	0.514	-0.01101	0.0073953	0.13655
rs78422743	G	A	0.0372265	-0.0021418	0.00322132	0.00316758	6.86e-31	0.499	0.016449	0.0048475	0.00069041
rs78424787	A	C	-0.0139401	-0.0291002	0.0044082	0.00434519	0.00157	2.13e-11	0.005066	0.0060679	0.40378
rs78444298	A	G	-0.00285803	-0.0529357	0.00674306	0.00665277	0.672	1.76e-15	0.016655	0.0082786	0.044235
rs78531123	A	G	0.0196715	-0.0275869	0.00353052	0.00347578	2.52e-08	2.07e-15	-0.0060323	0.0045063	0.18069
rs7864568	A	G	-0.0155363	0.0010578	0.00186321	0.00180712	7.53e-17	0.558	0.0050757	0.0024785	0.040575
rs78647991	A	G	-0.0228883	-0.00958964	0.00209427	0.00206185	8.38e-28	3.3e-06	0.0013453	0.0028826	0.64072
rs7870707	C	A	0.0143002	0.00127539	0.00207342	0.00203531	5.31e-12	0.531	0.0028314	0.0027094	0.29601
rs78946096	G	A	-0.0412973	-0.00451637	0.00387575	0.00382385	1.65e-26	0.238	-0.019485	0.0048801	6.5335e-05
rs7898735	C	T	-0.0154717	0.025315	0.00296711	0.002921	1.84e-07	4.45e-18	-0.0078851	0.0039961	0.048471
rs79112951	T	C	-0.00251768	-0.0328912	0.00450385	0.00442652	0.576	1.08e-13	-0.0033944	0.0055759	0.54269
rs79146711	T	C	0.0393911	0.015587	0.00674619	0.00660567	5.25e-09	0.0183	0.00073802	0.0074724	0.92132
rs79202680	T	G	-0.0717617	-0.150313	0.0102733	0.0101581	2.84e-12	1.52e-49	0.014344	0.016682	0.38988
rs793900	T	C	0.0107502	0.0070838	0.00166363	0.00163885	1.03e-10	1.54e-05	0.0034225	0.0023062	0.1378
rs79391862	C	A	-0.0646289	-0.00744587	0.00603927	0.00587336	1e-26	0.205	-0.013073	0.0098256	0.18336
rs7955221	C	A	-0.011502	-0.00277157	0.00169065	0.00166098	1.02e-11	0.0952	-0.0016181	0.0022963	0.48104
rs79610135	C	T	0.00183851	-0.0348209	0.00517268	0.00508289	0.722	7.35e-12	0.0054015	0.0060369	0.37092
rs79701229	A	G	0.150422	0.0316015	0.00818513	0.00802724	1.99e-75	8.26e-05	-0.063881	0.010005	1.7177e-10
rs7979554	A	G	-0.0142846	-0.00342906	0.00237124	0.00232202	1.7e-09	0.14	-0.0035645	0.0025947	0.1695
rs80098465	A	G	-0.042759	-5.59695e-05	0.00463693	0.00455771	2.93e-20	0.99	0.00070498	0.0062688	0.91046
rs80237836	A	T	-0.0729012	-0.0188197	0.0111765	0.010972	6.9e-11	0.0863	0.0099121	0.014733	0.50108
rs80336002	T	C	0.00682089	0.12767	0.0227972	0.0223729	0.765	1.15e-08	0.0024864	0.024229	0.91826
rs80349027	C	G	0.0200519	0.0476533	0.00758379	0.00743251	0.00819	1.44e-10	-0.0052167	0.0093525	0.57699
rs8041391	T	C	0.0147124	0.00591367	0.00237373	0.00232692	5.72e-10	0.011	-0.00059768	0.0031891	0.85134
rs8054124	C	T	0.00567042	0.0123646	0.00195324	0.00191987	0.0037	1.19e-10	-0.0047318	0.0027198	0.081899
rs8102244	C	T	0.0134367	0.00443444	0.00211317	0.00208153	2.04e-10	0.0331	0.00051029	0.0030366	0.86655
rs8191856	G	A	-0.0329393	-0.0177124	0.00537657	0.00529763	8.99e-10	0.000827	-0.0018083	0.0066855	0.78679
rs840939	A	G	-0.00390941	-0.0116598	0.00177411	0.00174227	0.0276	2.2e-11	0.0037808	0.0023262	0.10409
rs887276	T	C	0.0186935	0.000995006	0.00279027	0.00274346	2.09e-11	0.717	-0.007132	0.0040804	0.080487
rs900776	C	A	-0.019488	-0.00367338	0.00223711	0.00220366	3.01e-18	0.0955	0.0046572	0.0030024	0.12087
rs9297994	G	A	0.0315848	0.0215317	0.00172651	0.00169855	9.24e-75	7.98e-37	-0.0024408	0.0024103	0.31124
rs9311400	G	A	0.000101841	-0.011496	0.00164844	0.00162193	0.951	1.36e-12	0.0048038	0.0022808	0.03519
rs9423393	G	A	-0.00403389	-0.0124158	0.00170992	0.00168081	0.0183	1.5e-13	-0.0046898	0.0023505	0.046018
rs9429589	G	A	-0.00966774	-0.00180188	0.00171007	0.00168221	1.57e-08	0.284	-0.0025609	0.002363	0.27847
rs9465220	A	G	0.00737345	0.00955793	0.00174804	0.00171851	2.46e-05	2.67e-08	-0.0031773	0.0023832	0.18247
rs9515199	C	T	-0.0139335	-0.00675124	0.00167191	0.00164929	7.82e-17	4.25e-05	0.0041548	0.0023417	0.076021
rs9524538	A	G	0.0174327	-0.00793184	0.00192552	0.00189429	1.38e-19	2.82e-05	-0.0035167	0.0026454	0.18372
rs9535746	G	A	0.0120038	-0.00209001	0.00219233	0.00215555	4.37e-08	0.332	-0.004278	0.0030294	0.15789
rs9615937	C	G	0.0117848	0.0248506	0.00285826	0.00281156	3.74e-05	9.68e-19	-0.0082416	0.0039315	0.036055
rs9616942	A	G	0.0149287	0.00398654	0.00257614	0.00253078	6.83e-09	0.115	0.0022005	0.0035833	0.53916
rs9653945	A	G	-0.0113538	-0.0132054	0.00171532	0.00168868	3.61e-11	5.28e-15	0.0028513	0.0023881	0.2325
rs969075	T	C	-0.0152619	0.000978609	0.00177998	0.00174916	9.98e-18	0.576	-0.0011002	0.002422	0.64965
rs978458	T	C	0.0125053	-0.00924799	0.00186977	0.00183821	2.26e-11	4.88e-07	0.00067982	0.0025949	0.79334
rs9795910	G	A	-0.0123083	-0.00415221	0.0017379	0.00170855	1.42e-12	0.0151	-0.0031963	0.0023383	0.17165
rs9805560	G	A	0.0109092	0.000978277	0.0016504	0.00162287	3.84e-11	0.547	0.0041953	0.0022885	0.066776
rs9828193	G	A	0.00250489	0.0152529	0.00217093	0.00213372	0.249	8.77e-13	-0.0069913	0.003052	0.021979
rs9837622	A	T	-0.0350233	-0.00336697	0.00321484	0.0031623	1.23e-27	0.287	-0.00052478	0.0043576	0.90414
rs9889153	A	G	0.0157037	0.00257008	0.00194016	0.00190744	5.77e-16	0.178	0.0031885	0.0027143	0.24012
rs9896052	A	C	0.00407664	-0.0101895	0.00186603	0.0018323	0.0289	2.68e-08	0.0035207	0.0025336	0.16465
rs9896627	T	C	-0.00878486	-0.0128131	0.00195642	0.00192215	7.11e-06	2.63e-11	0.0046196	0.00261	0.076736
rs994286	A	G	-0.0345662	-0.0198374	0.00562655	0.00552815	8.08e-10	0.000333	-0.00029502	0.008874	0.97348
rs9967639	T	A	0.018084	0.00302569	0.00317828	0.00312701	1.27e-08	0.333	0.00060131	0.0043289	0.88953

## Sheet: S6
Supplemental Table 6. Final IV set used in the multivariable MR analysis for HDL-C and TG on LDL-C.
SNP	EA	NEA	Beta_HDL	Beta_TG	Se_HDL	Se_TG	P_HDL	P_TG	Beta_outcome	Se_outcome	P_outcome
rs1001204	G	A	-0.0119724	-0.00109986	0.00201264	0.00203298	2.7e-09	0.589	0.00085468	0.0028899	0.76742
rs10028284	T	A	0.0156881	-0.0108597	0.00209365	0.00211379	6.72e-14	2.78e-07	-0.0024561	0.003104	0.42879
rs10028665	T	C	0.0104499	0.000839466	0.00175998	0.00177682	2.89e-09	0.637	-0.0031261	0.0026108	0.23117
rs10030238	G	A	0.0057494	-0.00943844	0.0016239	0.0016395	0.000399	8.57e-09	-0.00087662	0.0024044	0.71542
rs10049088	T	C	0.022548	-0.0187714	0.00164307	0.00165901	7.38e-43	1.11e-29	0.00092214	0.0024275	0.70404
rs10052346	T	G	0.00980333	-0.0100165	0.00167341	0.00168542	4.68e-09	2.8e-09	0.0042327	0.0024286	0.081358
rs10093715	A	T	0.0130194	-0.0117364	0.00175245	0.0017709	1.09e-13	3.42e-11	-0.0031748	0.0024838	0.20119
rs10107837	G	C	-0.0218977	0.0199158	0.00216883	0.00219087	5.72e-24	9.87e-20	0.0021753	0.0028679	0.44815
rs10116849	A	G	-0.0141897	0.0118316	0.00191937	0.00194148	1.44e-13	1.1e-09	-0.0021892	0.0027722	0.42969
rs1012306	C	T	-0.00961205	0.000117377	0.00162625	0.00163662	3.41e-09	0.943	-0.00026685	0.0023762	0.91058
rs10127775	A	T	-0.0460926	0.0420614	0.00162291	0.00163733	1.95e-177	1.55e-145	0.0044757	0.0024133	0.063656
rs10128781	C	T	-0.00315246	-0.0130595	0.0017573	0.0017713	0.0728	1.67e-13	-0.0043373	0.0026162	0.09735
rs1013746	C	T	0.00987418	-0.0176665	0.00210178	0.00211568	2.63e-06	6.81e-17	-0.0034033	0.0030247	0.26053
rs10199829	C	A	0.00402077	-0.0151481	0.00168682	0.00172856	0.0171	1.89e-18	-0.00083898	0.0023959	0.72621
rs1021094	T	C	0.00886811	-0.00834392	0.00159319	0.00160577	2.6e-08	2.03e-07	-0.00042393	0.0023564	0.85723
rs10215153	A	G	-0.00981806	0.0120199	0.00174854	0.00175732	1.97e-08	7.92e-12	0.0013549	0.0025351	0.59302
rs10221267	C	T	-0.00819284	0.0102439	0.00161858	0.00163136	4.15e-07	3.4e-10	-3.6066e-06	0.002353	0.99878
rs10223860	G	T	-0.00183357	0.0109709	0.00171773	0.00173277	0.286	2.43e-10	-0.0044127	0.002543	0.082698
rs10242866	T	C	-0.0233956	0.0135452	0.00164554	0.00165247	7.13e-46	2.47e-16	-0.0043189	0.0024096	0.073077
rs10247757	A	C	0.0156502	-0.00901851	0.00253384	0.00254961	6.55e-10	0.000404	-0.0018145	0.0038316	0.6358
rs10250	T	G	0.0102969	-0.00952483	0.00172124	0.00174085	2.2e-09	4.47e-08	-0.0040411	0.0023892	0.09076
rs10260148	T	C	-0.0305771	0.0254786	0.00180879	0.00182157	4.15e-64	1.87e-44	0.010367	0.0026339	8.2796e-05
rs10273366	G	T	-0.0138946	0.0103092	0.00223784	0.00222613	5.33e-10	3.64e-06	0.0013306	0.0030236	0.65988
rs10273527	T	G	0.0127482	-0.0089166	0.00190595	0.00191363	2.25e-11	3.17e-06	-0.00043379	0.0027937	0.8766
rs10275549	A	T	-0.015251	0.0394597	0.00222308	0.00224105	6.87e-12	2.15e-69	0.0053332	0.0029931	0.074776
rs103294	T	C	0.0572123	-0.0138293	0.00195231	0.00197472	8.98e-189	2.5e-12	0.0089446	0.0028084	0.0014479
rs1037118	A	G	-0.00905481	-0.0105487	0.00176861	0.00177853	3.06e-07	3.01e-09	0.0029864	0.0025411	0.23991
rs10405944	C	T	-0.000572982	-0.0100312	0.00170523	0.00171137	0.737	4.59e-09	-0.0026267	0.0023936	0.27246
rs10419198	T	C	0.00861099	0.0166032	0.00182765	0.00184478	2.46e-06	2.26e-19	0.0063477	0.0027205	0.019633
rs10427109	C	T	-0.0293454	0.0370155	0.0044008	0.00442535	2.59e-11	6.04e-17	0.0022053	0.006769	0.74459
rs1043900	A	G	0.018804	-0.021125	0.00198727	0.00200259	3.01e-21	5.14e-26	-0.0034381	0.0028487	0.22748
rs1044531	C	T	-0.0166092	0.0129352	0.00278084	0.00280929	2.33e-09	4.14e-06	0.0023133	0.0041725	0.5793
rs1046747	A	G	-0.0092259	0.00302765	0.001647	0.00166559	2.12e-08	0.0691	-0.0013621	0.0024353	0.57595
rs10470884	A	G	0.00707152	-0.0151678	0.00188743	0.00190299	0.000179	1.58e-15	-0.0070859	0.0028158	0.011855
rs1055229	T	C	0.0111452	-0.00657052	0.00197295	0.00198973	1.61e-08	0.000959	0.0018094	0.0029482	0.5394
rs1061599	C	A	0.00971206	-0.0111491	0.00179327	0.00180772	6.1e-08	6.94e-10	0.00078676	0.0026717	0.76839
rs10746129	C	T	-0.00892627	0.00923891	0.00160099	0.00160958	2.47e-08	9.47e-09	0.0032724	0.0023693	0.16723
rs10757445	C	G	-0.00657036	0.00967499	0.00169129	0.00171079	0.000102	1.56e-08	0.0032707	0.0024246	0.17736
rs10763928	T	C	-0.0264454	0.0190674	0.00282023	0.00285184	6.79e-21	2.29e-11	-0.0024503	0.0040443	0.54459
rs10775406	A	G	0.010466	-0.0150475	0.00184882	0.00186769	1.51e-08	7.84e-16	-0.0032543	0.0027584	0.23808
rs10784771	G	A	0.00303094	-0.00992532	0.00166517	0.00167328	0.0687	3e-09	-0.0010081	0.0023699	0.67058
rs10786114	C	T	-0.0219898	0.0130276	0.00243399	0.00245467	1.65e-19	1.11e-07	-0.0022137	0.0035521	0.53315
rs10794175	T	G	-0.00943187	0.00553707	0.00162151	0.00163994	6e-09	0.000734	0.0030848	0.0023939	0.19753
rs10796821	A	G	0.00393611	-0.0106683	0.0016435	0.00164121	0.0166	8.02e-11	-0.0018678	0.0023587	0.42845
rs10818471	A	G	0.00995215	-0.0118196	0.00176109	0.00177401	1.59e-08	2.69e-11	-0.00046986	0.0025677	0.85481
rs10826337	A	G	-0.011349	0.00926405	0.00164084	0.00165529	4.63e-12	2.19e-08	-0.0031785	0.0023999	0.18536
rs10852553	A	G	0.0666928	-0.0121334	0.00219654	0.0022205	1e-200	4.65e-08	-0.011011	0.0031535	0.00048025
rs10853981	A	G	-0.0124446	0.0162377	0.00171433	0.00172875	3.89e-13	5.85e-21	-0.0018435	0.0025021	0.46127
rs10857421	C	T	0.0145516	-0.00528814	0.00254385	0.00257899	1.06e-08	0.0403	0.00068233	0.0036738	0.85266
rs10888177	A	G	0.0201508	-0.0190163	0.00164995	0.0016669	2.65e-34	3.81e-30	-0.0048375	0.0023714	0.041359
rs10908475	G	C	-0.0064794	0.0140598	0.00172092	0.00173454	0.000166	5.24e-16	0.0019692	0.0024713	0.42555
rs10911505	C	T	-0.0094526	0.00472542	0.00167594	0.00169085	1.7e-08	0.00519	-0.0032369	0.0024472	0.18593
rs10932536	C	T	0.0102324	-0.00831928	0.00159656	0.00161049	1.46e-10	2.4e-07	-3.2024e-05	0.0023569	0.98916
rs10951236	A	G	-0.0227625	0.0113111	0.00410755	0.00407873	3e-08	0.00555	-0.0078007	0.0056646	0.16848
rs10955991	T	C	0.0195548	0.00528192	0.00171344	0.00172212	3.62e-30	0.00216	-0.0045896	0.0025318	0.069865
rs10958704	G	A	-0.00936173	0.0134879	0.00162256	0.00163844	7.94e-09	1.84e-16	-0.0013671	0.0023987	0.56872
rs10961056	A	G	-0.0101129	0.00887559	0.00170494	0.00172289	3e-09	2.58e-07	0.00078668	0.0024701	0.75012
rs10971981	G	A	0.0101551	-0.0119109	0.00161218	0.00162444	3e-10	2.26e-13	0.0011634	0.0023605	0.62211
rs10985875	G	T	0.00806925	-0.0179293	0.00304991	0.00302479	0.00815	3.08e-09	-0.0010834	0.0037959	0.77533
rs11000759	G	A	0.00924023	-0.00264944	0.00166298	0.00167499	2.75e-08	0.114	-0.0027734	0.0023905	0.24598
rs11009319	A	G	0.00865991	-0.0137948	0.00230516	0.00232402	0.000172	2.93e-09	-0.0050498	0.003441	0.14223
rs11024681	A	G	0.0101234	-0.00147471	0.00171197	0.00172591	3.35e-09	0.393	0.0039972	0.0024692	0.10549
rs11031791	T	A	-0.0121623	0.00512533	0.00163519	0.00164692	1.02e-13	0.00186	-0.0051976	0.0023998	0.030319
rs11033573	T	C	0.0100158	-0.0062889	0.00172571	0.00174031	6.48e-09	0.000302	-0.0039601	0.0025289	0.11737
rs11045172	C	A	0.022924	-0.016646	0.00200793	0.0020288	3.45e-30	2.31e-16	-0.0026563	0.0029698	0.37109
rs11046481	G	T	0.0110274	-0.0170781	0.00197168	0.00198668	2.23e-08	8.23e-18	0.0012345	0.0027814	0.65714
rs11071371	T	C	-0.0698823	-0.0194878	0.00239429	0.00241782	2.83e-187	7.63e-16	-0.012672	0.0035186	0.00031663
rs11076176	G	T	-0.218864	0.0328514	0.00217278	0.00220816	1e-200	4.63e-50	0.022774	0.0032215	1.5582e-12
rs11082315	G	A	0.0130398	-0.00979275	0.002003	0.00202594	7.51e-11	1.34e-06	-0.0010984	0.002953	0.70992
rs11086219	A	C	0.0148634	-0.00784951	0.00186028	0.00187767	1.35e-15	2.91e-05	-0.00012065	0.0026214	0.96329
rs1109334	G	A	-0.00502717	0.00941814	0.00171103	0.00172754	0.0033	4.99e-08	0.0030776	0.0023999	0.19972
rs1109560	A	C	0.0464901	-0.00460746	0.00276047	0.00277609	1.21e-63	0.097	0.011995	0.0040928	0.0033822
rs11113118	A	G	-0.00918553	0.0169119	0.00189985	0.00191607	1.33e-06	1.08e-18	0.0010179	0.0027167	0.7079
rs11123823	G	A	0.00759103	-0.00894512	0.00160809	0.00161815	2.35e-06	3.24e-08	2.0437e-05	0.0023582	0.99309
rs111606268	C	T	0.0364056	0.00774396	0.00522679	0.0052689	3.28e-12	0.142	0.011132	0.0069046	0.10692
rs11170538	C	T	-0.0167307	0.0103711	0.00193456	0.00192062	5.23e-18	6.67e-08	0.0040711	0.0023719	0.086087
rs111712708	A	G	0.00923286	-0.0122368	0.00177304	0.00178411	1.92e-07	6.95e-12	-0.0020216	0.0024165	0.40283
rs111731678	A	T	-0.013445	0.0119666	0.00219713	0.00222649	9.4e-10	7.67e-08	-0.0031677	0.0030141	0.29328
rs111953593	T	C	-0.00828301	-0.0302709	0.00482792	0.00486326	0.0862	4.83e-10	-0.0070106	0.0067975	0.30238
rs11196149	A	G	0.00109501	-0.014355	0.00254948	0.00254718	0.668	1.74e-08	-0.0016544	0.0033246	0.61876
rs11216386	T	C	-0.0203587	0.0216837	0.00273659	0.00275595	1.01e-13	3.6e-15	0.001044	0.0041088	0.79943
rs11229087	T	C	-0.011149	0.00542212	0.0017819	0.00180028	3.93e-10	0.0026	0.0032214	0.0026958	0.23209
rs112299859	C	T	0.0339917	-0.090456	0.0108274	0.0109029	0.00169	1.07e-16	0.023642	0.013962	0.090395
rs112341819	C	G	-0.0310854	0.0230332	0.00541092	0.00545289	9.2e-09	2.4e-05	0.012321	0.0075261	0.10162
rs11242227	G	A	-0.0116659	0.0176259	0.00255447	0.00257603	4.95e-06	7.79e-12	0.0010928	0.0038354	0.77571
rs11245481	A	G	-0.0116045	0.00250374	0.00182598	0.00184898	2.08e-10	0.176	-0.0013172	0.0026231	0.61557
rs11253048	G	A	-0.0116025	-0.0187491	0.00209579	0.00211711	3.09e-08	8.29e-19	-0.010943	0.0030764	0.00037482
rs112552124	T	G	-0.0209491	0.017825	0.00383547	0.00385816	4.71e-08	3.84e-06	0.0030595	0.0055018	0.57815
rs112557500	G	A	-0.0324712	0.0412747	0.00735061	0.00745428	9.99e-06	3.08e-08	-0.0037929	0.0097265	0.69657
rs11264224	C	A	0.0125571	-0.00183684	0.00226421	0.00228831	2.92e-08	0.422	-0.0047794	0.0031886	0.1339
rs11265564	A	G	-0.00999487	0.00582692	0.00164356	0.00165741	1.19e-09	0.000439	-0.0024486	0.0023946	0.30652
rs1126673	C	T	0.0103871	-0.0141862	0.00173976	0.00174527	2.37e-09	4.35e-16	-0.0036455	0.002563	0.15492
rs112877683	A	G	0.174137	-0.0190566	0.00804935	0.00813787	8.66e-104	0.0192	-0.0091578	0.012434	0.46143
rs112924314	T	C	-0.0278677	0.00994385	0.00396162	0.00399989	2e-12	0.0129	-0.0099812	0.0051275	0.051584
rs113231830	G	C	-0.0703687	0.0725139	0.00897759	0.0090852	4.57e-15	1.45e-15	0.011511	0.011728	0.32634
rs113232777	C	T	0.0405012	0.0131321	0.00583503	0.00589145	3.89e-12	0.0258	0.0089043	0.0080558	0.26902
rs113235777	G	C	0.0180404	-0.0428487	0.00738339	0.00741617	0.0146	7.57e-09	-0.0016136	0.011107	0.88449
rs113271699	A	C	0.0812014	-0.0463191	0.0067936	0.00684421	6.29e-33	1.31e-11	-0.01769	0.0097581	0.069848
rs113286621	A	G	0.166657	-0.0220392	0.00827804	0.00830516	3.84e-90	0.00796	-0.019043	0.013699	0.16448
rs113298164	T	C	0.281443	0.143944	0.012983	0.0131761	3.32e-104	8.79e-28	-0.013469	0.027001	0.61789
rs1133400	G	A	-0.00670316	0.0144629	0.00197786	0.00200433	0.000701	5.36e-13	0.0020176	0.0028293	0.47577
rs113411992	T	C	0.0103986	-0.00914541	0.00160435	0.00161782	9.08e-11	1.58e-08	0.0028779	0.0023571	0.2221
rs113647163	A	G	0.0420473	0.00619956	0.00457792	0.00460436	4.12e-20	0.178	0.016121	0.0066793	0.015799
rs113778500	T	C	-0.0308782	0.00894331	0.00556969	0.00563116	2.96e-08	0.112	0.0060508	0.0074866	0.41897
rs114040256	G	A	0.0503668	-0.0706827	0.00983957	0.0100071	3.07e-07	1.63e-12	-0.0071513	0.011348	0.52859
rs114155959	A	C	0.0246353	-0.0132612	0.00443431	0.00449082	2.77e-08	0.00315	-0.0016752	0.00588	0.77573
rs114382562	G	A	-0.0228047	0.100657	0.00930232	0.0092918	0.0142	2.4e-27	0.010954	0.014715	0.45663
rs114529418	A	T	0.02173	-0.0889042	0.00925768	0.00934166	0.0189	1.78e-21	-0.039768	0.011868	0.00080554
rs114797983	T	C	-0.0172803	0.0232732	0.00357882	0.00361203	1.38e-06	1.17e-10	-0.0030193	0.0054056	0.57648
rs1149709	G	A	0.00931292	-0.00840659	0.00163651	0.00165582	1.27e-08	3.83e-07	0.0027683	0.0024071	0.25011
rs115358989	T	C	0.0454757	-0.0507754	0.0082089	0.00831784	3.03e-08	1.03e-09	0.015648	0.010733	0.14485
rs115369740	A	G	-0.0285858	0.0357394	0.00528038	0.00534286	6.18e-08	2.24e-11	0.011767	0.0080157	0.14212
rs11542704	T	C	-0.021633	0.0150027	0.00378078	0.00379908	1.05e-08	7.85e-05	-0.0072071	0.0054709	0.18772
rs115506546	G	A	-0.02215	0.0270785	0.00407488	0.00411555	5.46e-08	4.72e-11	-0.0094104	0.0053489	0.078522
rs11569309	C	T	-0.0127239	0.0137909	0.00200553	0.00202245	2.23e-10	9.17e-12	0.00084137	0.0029476	0.7753
rs11580946	A	G	0.0218821	-0.043354	0.0067859	0.00686796	0.00126	2.75e-10	-0.0039927	0.0092621	0.66641
rs1158553	C	G	0.00999124	-0.0116109	0.00175356	0.00176632	1.21e-08	4.91e-11	-0.0010739	0.0025653	0.67548
rs11586902	T	C	-0.00898104	0.00729425	0.00162897	0.00164095	3.52e-08	8.78e-06	0.001903	0.0023686	0.42172
rs11587362	T	C	0.009504	-0.00551866	0.00168583	0.00170099	1.72e-08	0.00118	-0.0001307	0.0024607	0.95764
rs115912456	G	A	0.0273299	-0.0248881	0.00395147	0.00398696	4.63e-12	4.31e-10	-0.0009274	0.0059326	0.87578
rs116006942	A	G	-0.022339	0.0273682	0.00348334	0.0035167	1.43e-10	7.12e-15	0.00083993	0.0049468	0.86517
rs116008080	A	G	0.0386676	-0.0114022	0.00528248	0.00532762	2.48e-13	0.0323	-0.00022764	0.0077691	0.97663
rs11603123	A	G	-0.0269287	0.0180657	0.00450069	0.0045336	2.19e-09	6.75e-05	-0.0015058	0.0065393	0.81788
rs11605773	C	T	0.0248064	-0.0175417	0.00306671	0.00309099	6.02e-16	1.39e-08	0.01267	0.0045572	0.0054322
rs116204487	C	G	-0.0436805	0.0449368	0.00386821	0.00390076	1.43e-29	1.05e-30	-0.0058627	0.0053718	0.2751
rs11637314	T	C	-0.0153377	0.0132799	0.00252857	0.00254754	1.31e-09	1.86e-07	-0.0019292	0.0039488	0.62516
rs11641586	T	G	0.00717276	-0.0133403	0.0020571	0.00208207	0.000489	1.48e-10	-0.001428	0.0029584	0.62931
rs116425781	G	C	-0.00542003	0.0721098	0.00659312	0.00664677	0.411	2.02e-27	0.0020848	0.0092712	0.82208
rs11642862	T	C	-0.0170837	0.00706135	0.00262103	0.00265127	7.13e-11	0.00774	0.0025598	0.0036912	0.48801
rs11644601	C	T	0.0177111	-0.0258095	0.00177934	0.00179429	2.43e-23	6.5e-47	0.0058121	0.0025793	0.024233
rs116449148	A	G	-0.00724224	0.0599575	0.00951728	0.00958087	0.447	3.9e-10	0.022015	0.013581	0.105
rs11649885	A	G	-0.00791236	0.00904334	0.00163377	0.00164692	1.28e-06	4e-08	9.8251e-05	0.0023603	0.9668
rs11650043	A	G	0.0281919	-0.0221201	0.0031333	0.00314887	2.31e-19	2.14e-12	0.0099381	0.0046457	0.03242
rs11651957	A	G	-0.0235882	0.024491	0.00340013	0.00342411	3.99e-12	8.52e-13	0.0067208	0.0050057	0.17939
rs11656686	T	C	0.00969082	-0.000757168	0.00170044	0.00169064	1.21e-08	0.654	0.0037502	0.002373	0.11403
rs116603069	A	G	0.00301236	0.0631017	0.00571807	0.00576664	0.598	7.21e-28	0.018432	0.0084073	0.02835
rs116636690	A	G	0.0527513	-0.0544956	0.00641425	0.00652236	1.97e-16	6.53e-17	-0.0087488	0.0086432	0.31143
rs11664106	T	A	0.00969053	-0.0105517	0.00190475	0.00190236	3.63e-07	2.91e-08	-0.0032431	0.0024926	0.19323
rs11670364	T	C	0.010043	-0.00665282	0.001823	0.0018439	3.61e-08	0.000309	0.00048359	0.0026349	0.85438
rs116843064	A	G	0.217611	-0.244759	0.00571034	0.00574545	1e-200	1e-200	-0.0047604	0.0084988	0.5754
rs11687971	T	C	0.0115012	-0.0127195	0.00223114	0.00225592	2.54e-07	1.72e-08	-0.0043312	0.0032271	0.17955
rs11690364	A	G	-0.0200276	0.0242749	0.00260679	0.00263043	1.56e-14	2.74e-20	0.015021	0.003878	0.00010728
rs116919951	C	T	-0.0286124	0.0474965	0.00719437	0.00724644	6.98e-05	5.58e-11	0.0034396	0.0098998	0.72826
rs11694828	A	G	0.0160181	-0.000193587	0.00167474	0.0016967	1.13e-21	0.909	0.0012471	0.0024469	0.61029
rs117022969	A	G	0.0305432	-0.0433471	0.00733142	0.0073662	3.1e-05	3.99e-09	-0.0054137	0.0102	0.5956
rs117053202	C	G	-0.0385246	-0.00958546	0.00370205	0.00374079	2.32e-25	0.0104	-0.0073336	0.0054502	0.17844
rs11712910	A	C	-0.0122338	0.00927178	0.00179786	0.00181072	1.01e-11	3.05e-07	-0.0057412	0.002613	0.028009
rs117195351	A	T	0.0285263	-0.0253817	0.0048549	0.00486759	4.21e-09	1.84e-07	0.0018487	0.006867	0.78776
rs117206526	C	A	-0.051508	0.0028148	0.00565121	0.0057157	7.9e-20	0.622	-0.010124	0.0082365	0.219
rs117260553	A	G	0.0401434	-0.0812083	0.0108672	0.0110332	0.000221	1.83e-13	-0.0030587	0.01538	0.84236
rs117288140	T	C	-0.0270466	0.0405593	0.00692912	0.0070272	9.49e-05	7.84e-09	0.011205	0.0084618	0.18543
rs117323391	T	C	-0.0425472	0.0029948	0.00521355	0.00526145	3.33e-16	0.569	-0.016735	0.0068351	0.014352
rs117349201	T	C	-0.0430125	0.0151649	0.00699912	0.00711125	7.98e-10	0.033	-0.016532	0.0091007	0.069282
rs117357660	T	C	0.0865346	-0.00938218	0.00918554	0.00922729	4.48e-21	0.309	-0.013474	0.01311	0.30409
rs117388016	T	G	0.0540657	-0.0112497	0.00570679	0.00573429	2.7e-21	0.0498	0.0053096	0.0091544	0.56191
rs117389878	G	C	0.052187	0.0134735	0.00591934	0.0059744	1.18e-18	0.0241	0.0096432	0.0083374	0.24743
rs1175048	C	T	0.0248146	-0.00418601	0.00344917	0.00349133	6.28e-13	0.231	0.012476	0.004925	0.011305
rs11751347	T	C	-0.0566146	0.0373912	0.00273918	0.00276719	6.66e-95	1.32e-41	-0.018273	0.0039037	2.8559e-06
rs1175293	C	T	-0.0225518	-0.00477056	0.00394517	0.00394169	1.09e-08	0.226	-0.0014768	0.0052883	0.78005
rs11761030	C	T	0.0247395	-0.0481493	0.00822911	0.00827356	0.00264	5.9e-09	-0.0068103	0.013003	0.60045
rs117626736	A	G	-0.0650001	0.0116138	0.0114299	0.0114676	1.29e-08	0.311	-0.010467	0.014239	0.46229
rs11765031	T	C	0.00238122	-0.0109548	0.00175573	0.00176079	0.175	4.92e-10	0.0018714	0.0024318	0.44157
rs117665650	C	G	0.0149887	-0.00421198	0.00271405	0.00274676	3.34e-08	0.125	-0.0028885	0.0038744	0.45595
rs11781886	C	T	-0.00343076	0.0116895	0.00189575	0.00191386	0.0703	1.01e-09	0.0052141	0.0027802	0.060731
rs117824386	A	G	0.0493509	0.00567246	0.00682811	0.00690322	4.92e-13	0.411	0.020386	0.009632	0.034306
rs117828446	G	A	-0.0382048	0.0265926	0.00698133	0.00703243	4.44e-08	0.000156	-0.0096013	0.010761	0.37225
rs117852131	A	G	0.100872	-0.0185024	0.0139742	0.0142776	5.26e-13	0.195	-0.021722	0.014695	0.13938
rs11795343	C	T	0.0108291	-0.00784815	0.0016359	0.00165019	3.6e-11	1.98e-06	0.0016861	0.0024115	0.48443
rs117983609	G	A	0.0850473	-0.0765245	0.00739269	0.00745225	1.26e-30	9.76e-25	-0.019445	0.011072	0.079043
rs118005791	A	C	0.0524083	-0.00900348	0.00824901	0.00837892	2.11e-10	0.283	-0.0081572	0.011808	0.48969
rs118027010	T	C	0.0617756	-0.0122079	0.00720704	0.00725699	1.02e-17	0.0925	-0.0001681	0.0094254	0.98577
rs118045108	T	C	-0.0340388	0.0547057	0.00591613	0.0059632	8.74e-09	4.56e-20	0.0063743	0.0077741	0.41225
rs118078695	A	G	0.130903	0.0317791	0.00789113	0.0079684	8.42e-62	6.66e-05	0.018788	0.010685	0.078683
rs118088990	A	G	-0.00398645	0.0270024	0.00332904	0.00335706	0.231	8.73e-16	-0.0094701	0.0048855	0.052573
rs118139539	G	C	0.0386904	0.0103603	0.00500715	0.00505375	1.1e-14	0.0404	-0.0040424	0.0077843	0.60355
rs11862052	T	C	-0.0785252	0.0111343	0.00231872	0.00234113	1e-200	1.98e-06	0.011104	0.0033022	0.00077172
rs11870735	T	C	-0.0147526	0.0136564	0.00210836	0.00212884	2.61e-12	1.41e-10	-0.0018162	0.0030671	0.55375
rs11941320	C	A	-0.0117518	0.00460464	0.00189594	0.00191087	5.7e-10	0.016	-0.00093189	0.0027084	0.7308
rs11986182	T	A	0.066349	-0.0712692	0.00218178	0.00220442	1e-200	1e-200	-0.0065832	0.0031656	0.037559
rs12023563	A	G	0.00648551	-0.0103076	0.00176265	0.00177845	0.000234	6.8e-09	-0.0030851	0.0025999	0.23539
rs12034991	G	A	-0.0107111	0.00736126	0.00171218	0.00172665	3.95e-10	2.01e-05	-0.0025121	0.0024425	0.30374
rs1204836	A	G	0.0114176	-0.002086	0.00195404	0.00197285	5.12e-09	0.29	0.0039788	0.0028685	0.16543
rs12101186	G	A	-0.0131678	0.00828042	0.00210695	0.00212781	4.11e-10	9.96e-05	0.00031022	0.0030748	0.91964
rs12129763	C	T	0.0105072	-0.00970654	0.00162758	0.00164303	1.08e-10	3.47e-09	-0.001232	0.0023912	0.60639
rs12143329	T	C	0.0113516	-0.00920767	0.00163398	0.0016497	3.73e-12	2.39e-08	-0.0015106	0.0024116	0.53107
rs12155724	T	A	0.00984847	-0.00717838	0.00172838	0.00173902	1.21e-08	3.66e-05	0.00059818	0.0025014	0.811
rs12226389	C	T	-0.0132468	0.0110171	0.00209098	0.00210071	2.37e-10	1.57e-07	-0.00043973	0.0030573	0.88563
rs12234017	G	A	0.0152092	-0.0177715	0.0018272	0.00184258	8.52e-17	5.17e-22	-0.0015095	0.0027311	0.58045
rs12254046	T	C	-0.0109511	0.0412957	0.00643789	0.00638944	0.0889	1.03e-10	0.0049174	0.0075703	0.51598
rs1229486	A	G	-0.00101312	-0.0103228	0.00161143	0.00162151	0.53	1.94e-10	-0.0032319	0.0023642	0.17162
rs12309254	C	T	0.015629	-0.0134065	0.0017098	0.00172559	6.2e-20	7.9e-15	-0.0087593	0.0024576	0.00036517
rs12358424	G	T	-0.0270174	0.0187381	0.00285967	0.00288319	3.46e-21	8.08e-11	-0.0023273	0.0040588	0.56637
rs12372459	T	C	-0.0168402	0.014963	0.00270183	0.00272303	4.58e-10	3.91e-08	0.0014702	0.0037372	0.69403
rs1240808	G	A	0.0112084	-0.00588924	0.00167289	0.00168917	2.08e-11	0.000489	-0.0015022	0.0024889	0.54614
rs12415055	G	A	-0.0193959	0.00540635	0.00250822	0.00252902	1.05e-14	0.0325	-0.0089144	0.0036844	0.015543
rs12434231	C	T	-0.0156488	0.00694194	0.00222884	0.00225201	2.2e-12	0.00205	-0.0010275	0.0032453	0.75154
rs12452187	G	A	-0.00974057	0.00710816	0.00170978	0.00171924	1.22e-08	3.56e-05	0.0022436	0.0024381	0.35745
rs12463464	T	G	-0.00945389	0.0114603	0.00160156	0.00161572	3.57e-09	1.31e-12	0.0048649	0.0023677	0.039907
rs12477711	T	C	-0.0088304	0.0032479	0.0016033	0.00161559	3.64e-08	0.0444	-0.0017469	0.002372	0.46144
rs12502605	C	T	-0.0181805	0.0180119	0.00207173	0.00209423	1.7e-18	7.92e-18	0.0059327	0.003059	0.052451
rs1250530	T	C	0.0132683	-0.00738826	0.00177134	0.00179326	6.86e-14	3.79e-05	0.00041649	0.0025695	0.87123
rs12506484	T	C	-0.0173083	0.0104953	0.00276055	0.00278305	3.61e-10	0.000162	-0.0028343	0.0041452	0.49414
rs12523418	G	A	0.0124946	-0.0109827	0.0017369	0.00175211	6.31e-13	3.65e-10	0.00077548	0.0025633	0.76224
rs12529313	G	A	-0.00261657	0.0233031	0.00221433	0.00221772	0.237	7.96e-26	0.0028074	0.0032572	0.38875
rs12529361	C	T	0.00773285	-0.0179112	0.00204938	0.00207092	0.000161	5.2e-18	-0.00056955	0.0029394	0.84636
rs12533197	G	T	-0.0159914	0.0038675	0.00162617	0.00163094	8.05e-23	0.0177	0.0059912	0.0023843	0.011979
rs12534129	C	T	-0.0119329	0.0127483	0.00168739	0.00169358	1.53e-12	5.17e-14	0.0046354	0.0024315	0.056598
rs1253920	T	G	0.0103758	0.000483692	0.00163268	0.00164753	2.08e-10	0.769	0.00047984	0.0024366	0.84388
rs12545916	A	G	-0.012394	0.0120609	0.00190584	0.00191538	7.86e-11	3.04e-10	0.0051322	0.0028726	0.073996
rs12571496	A	C	-0.0248796	0.0171068	0.00208028	0.00209871	5.77e-33	3.61e-16	-0.012816	0.0030713	3.0103e-05
rs12574158	G	C	-0.0115364	0.0173337	0.00236414	0.00238581	1.06e-06	3.72e-13	0.00025146	0.0034017	0.94107
rs12574790	T	C	-0.0974448	0.16389	0.00802651	0.00807484	6.45e-34	1.38e-91	0.042806	0.012521	0.00062912
rs12575459	A	G	0.0205825	-0.00877806	0.00305573	0.00307684	1.63e-11	0.00433	0.0030132	0.0043328	0.48677
rs12585801	A	G	0.0140692	-0.0044066	0.0022632	0.00227904	5.08e-10	0.0532	-0.0013499	0.0033339	0.68554
rs12597335	A	G	0.0228125	-0.0032695	0.00160317	0.00161874	6e-46	0.0434	-0.0053441	0.0023569	0.023363
rs12598451	A	G	-0.010323	0.00406339	0.00187551	0.00190036	3.71e-08	0.0325	0.0018771	0.002678	0.48334
rs12617848	T	C	0.00056495	0.0292021	0.00234179	0.0023661	0.809	5.39e-35	0.013009	0.0033531	0.00010466
rs12654983	A	G	-0.0202341	0.026836	0.00347409	0.00350749	5.74e-09	1.99e-14	-0.0094228	0.0050358	0.06132
rs1268855	T	C	-0.00454671	0.0132835	0.00216059	0.00218448	0.0353	1.2e-09	-0.0058593	0.0032453	0.071002
rs1271145	A	G	0.0326776	-0.0113182	0.00562481	0.00564195	6.26e-09	0.0448	-0.00031515	0.007744	0.96754
rs12721043	A	C	0.212329	-0.177506	0.00771167	0.00774216	6.98e-167	2.49e-116	-0.011481	0.011142	0.30279
rs12725301	T	C	-0.00810381	0.0140934	0.00200513	0.00202416	5.31e-05	3.34e-12	-0.00023272	0.0028771	0.93553
rs1273581	C	G	-0.0450072	0.00851209	0.00332711	0.00336687	1.08e-41	0.0115	0.0006166	0.0049138	0.90014
rs12772930	A	G	-0.00271044	0.0111185	0.00167831	0.00169282	0.106	5.1e-11	0.001141	0.0024594	0.64269
rs12788711	G	A	-0.00805328	0.0114252	0.00202615	0.00204984	7.05e-05	2.49e-08	-0.0035364	0.0029631	0.23269
rs12791103	T	G	0.0182914	-0.0611138	0.00271076	0.00272893	1.5e-11	4.42e-111	-0.022892	0.0039834	9.0918e-09
rs12832859	T	C	0.0427355	-0.00478139	0.00237751	0.0023906	3.06e-72	0.0455	-0.0010993	0.003593	0.75964
rs12907378	A	G	-0.0533163	-0.0121602	0.00269176	0.00272502	2.58e-87	8.1e-06	-0.012291	0.0039143	0.0016897
rs12928099	A	C	0.017503	-0.0258457	0.00175978	0.00177432	2.62e-23	4.59e-48	0.0057461	0.0025823	0.026066
rs12931143	C	T	-0.0120495	0.0087661	0.00169122	0.00171602	1.04e-12	3.25e-07	-0.0051361	0.0023571	0.029333
rs12940636	C	T	0.0117085	-0.00365797	0.00168424	0.00169877	3.61e-12	0.0313	0.00084967	0.0024834	0.73225
rs12949173	C	G	-0.00528777	0.0134286	0.00209041	0.00211319	0.0114	2.09e-10	0.0022916	0.0027885	0.41119
rs12956499	A	G	-0.0234974	0.0019384	0.00426623	0.00431233	3.63e-08	0.653	-0.0035284	0.0060491	0.55969
rs12975319	A	G	-0.0164533	0.00704205	0.00176972	0.00178649	1.44e-20	8.09e-05	0.0016848	0.0025807	0.51387
rs12978990	T	C	-0.00594959	0.0211073	0.00242273	0.00244319	0.0141	5.66e-18	0.0080209	0.0034186	0.018964
rs13027837	A	G	0.0130836	-0.0114271	0.00216803	0.00219276	1.59e-09	1.88e-07	-0.0051475	0.003127	0.09973
rs13056230	T	C	-0.00799349	0.00918679	0.00161728	0.00163732	7.71e-07	2.01e-08	0.00092341	0.0023757	0.6975
rs13066793	G	A	0.017521	-0.0171525	0.00286055	0.00288278	9.07e-10	2.68e-09	0.001685	0.0041094	0.68178
rs13214458	T	G	0.0067854	-0.0115437	0.00185269	0.00186621	0.00025	6.19e-10	-0.00096385	0.0027163	0.72271
rs13237518	A	C	-0.0133279	0.0104269	0.00165127	0.00165914	6.96e-16	3.29e-10	0.00037089	0.0023852	0.87643
rs13239670	C	T	0.0198602	-0.0433771	0.0017082	0.00172092	3.03e-31	3.46e-140	0.00014539	0.0023788	0.95126
rs1326122	A	C	0.0349595	-0.0445379	0.00541472	0.005435	1.07e-10	2.51e-16	-0.023251	0.0081107	0.0041483
rs13273592	C	T	-0.0200583	0.0230446	0.00177097	0.00178204	9.74e-30	2.99e-38	0.012137	0.0026056	3.1935e-06
rs1330145	G	T	-0.00880568	0.00325696	0.00159938	0.00161316	3.68e-08	0.0435	0.0014102	0.0023668	0.5513
rs13303359	A	C	-0.0134163	0.0156831	0.0018083	0.00183038	1.18e-13	1.05e-17	0.0010792	0.0023777	0.64991
rs13303368	G	C	0.0109526	-0.00131883	0.00182225	0.00183669	1.85e-09	0.473	0.0027371	0.0024075	0.25558
rs133441	T	A	-0.011263	0.0144534	0.00199681	0.00201244	1.7e-08	6.87e-13	0.0025186	0.002808	0.36975
rs13404250	T	C	0.01042	-0.00919738	0.00171136	0.00172121	1.14e-09	9.11e-08	0.0027534	0.00254	0.27836
rs13428915	T	G	0.0183549	-0.0168337	0.00195857	0.00197458	7.15e-21	1.53e-17	0.00068514	0.0029259	0.81486
rs13432396	A	C	-0.0131007	-0.000592641	0.0016144	0.00162796	4.86e-16	0.716	-0.0044824	0.0023674	0.058308
rs13432533	G	A	0.00951204	-0.00352726	0.00160666	0.00162042	3.21e-09	0.0295	-0.0028833	0.0023648	0.22275
rs13734	A	G	-0.0155864	0.00234475	0.00207132	0.00208981	5.28e-14	0.262	0.0074184	0.0030494	0.014985
rs138122475	A	G	-0.0432179	0.0211014	0.00773932	0.00778405	2.35e-08	0.00671	0.011507	0.0096354	0.23239
rs138283783	C	T	0.0802083	0.0259615	0.0076614	0.00770981	1.2e-25	0.000759	-0.012313	0.011899	0.30078
rs138436155	C	G	-0.0410741	0.0253196	0.00508946	0.00514706	7.01e-16	8.69e-07	0.0041705	0.0059879	0.48613
rs138572354	A	C	-0.0477019	0.020048	0.00335148	0.00338953	5.71e-46	3.33e-09	-0.0018317	0.0049283	0.71013
rs138692142	T	C	-0.0738522	0.0303358	0.00978125	0.00996196	4.34e-14	0.00233	-0.013502	0.011687	0.24795
rs138783171	G	A	-0.0308345	0.0292129	0.00481416	0.00485129	1.5e-10	1.73e-09	-0.0025952	0.0071037	0.71486
rs138808037	T	C	-0.0455633	0.0304617	0.0050935	0.00514552	3.71e-19	3.22e-09	0.02408	0.0071204	0.00072018
rs138966397	A	T	0.0817464	-0.0796777	0.00770548	0.00772381	2.71e-26	5.97e-25	-0.00050308	0.012661	0.9683
rs139211342	A	G	0.107506	-0.00794298	0.0105326	0.0106928	1.85e-24	0.458	0.024219	0.012863	0.059721
rs139446067	C	A	-0.021325	0.0275927	0.00495856	0.00502519	1.7e-05	4e-08	0.0010612	0.0069124	0.87799
rs139473010	A	C	0.0324871	-0.030416	0.00520892	0.0052416	4.47e-10	6.52e-09	0.010227	0.007649	0.18122
rs139580320	C	A	-0.0268713	0.012014	0.0048311	0.00487554	2.66e-08	0.0137	-0.0077253	0.0069136	0.26382
rs139692954	T	A	0.062805	0.00214403	0.010709	0.0108312	4.5e-09	0.843	0.012973	0.016505	0.43187
rs139752533	T	C	0.0614168	-0.017091	0.0107599	0.0108934	1.14e-08	0.117	0.00043944	0.016086	0.97821
rs139828053	C	T	-0.0279735	0.000711054	0.00506361	0.00512493	3.31e-08	0.89	-0.0051972	0.0068511	0.4481
rs139937507	T	C	0.0444538	-0.00353601	0.00465881	0.0047242	1.4e-21	0.454	0.0031997	0.0058015	0.58126
rs140133389	C	G	-0.0856399	0.0245949	0.00415545	0.00418364	2.28e-94	4.13e-09	0.014126	0.0060414	0.01938
rs140201358	G	C	-0.0590546	0.027381	0.00722112	0.00724548	2.89e-16	0.000157	-0.00098247	0.010061	0.92221
rs140234541	C	T	-0.0733239	0.00180846	0.0120122	0.0121759	1.03e-09	0.882	-0.019798	0.0183	0.27932
rs140390701	T	C	0.0859064	-0.0448242	0.0114198	0.0114996	5.37e-14	9.7e-05	0.019683	0.016063	0.22045
rs140515992	T	C	0.00446285	-0.0687741	0.00744386	0.00747603	0.549	3.6e-20	-0.033016	0.010693	0.0020175
rs140667516	G	A	0.00313874	0.0748319	0.0078933	0.00801087	0.691	9.52e-21	0.025489	0.0093615	0.0064743
rs140947018	A	G	0.013072	-0.0335692	0.00488335	0.00492007	0.00743	8.92e-12	-0.0051802	0.0071093	0.46621
rs140959239	T	C	-0.0193518	0.135429	0.0119976	0.0121909	0.107	1.13e-28	0.04258	0.014666	0.0036918
rs141201631	C	T	-0.0528183	0.00584727	0.00849927	0.00856817	5.15e-10	0.495	0.0087157	0.013154	0.50761
rs141705406	T	C	0.0309905	-0.0104921	0.00430747	0.00435038	6.26e-13	0.0159	0.011217	0.006193	0.070116
rs141933555	A	G	-0.0328824	0.0292849	0.00400305	0.00404593	2.13e-16	4.55e-13	0.0035492	0.0057879	0.53974
rs142412997	C	G	0.0514152	-0.111442	0.013387	0.0135715	0.000123	2.18e-16	0.0086793	0.019449	0.65541
rs1425485	T	C	0.0205189	-0.0161522	0.00189534	0.00191125	2.59e-27	2.89e-17	0.0006257	0.0028246	0.82469
rs142674900	C	G	0.0500082	-0.0661995	0.0108671	0.0110906	4.19e-06	2.39e-09	0.0018413	0.013176	0.88886
rs142694060	G	C	-0.105449	0.0162005	0.00834776	0.0085055	1.41e-36	0.0568	0.028901	0.011049	0.0089033
rs142714712	T	A	0.108257	-0.160118	0.0146788	0.0148481	1.64e-13	4.11e-27	-0.025757	0.020938	0.21865
rs143315658	C	T	0.0644459	-0.0678099	0.00342922	0.0034516	8.59e-79	6.26e-86	-0.0065781	0.0052571	0.21083
rs143393480	T	G	-0.0539864	0.0499557	0.00888388	0.00895373	1.23e-09	2.41e-08	0.016164	0.011225	0.14987
rs143421598	T	C	-0.00375343	0.0711164	0.0080508	0.00817815	0.641	3.44e-18	0.020752	0.0094326	0.027807
rs143834286	C	T	-0.0339038	0.0267859	0.00598767	0.00604651	1.49e-08	9.42e-06	0.004459	0.0078615	0.57058
rs1438588	A	G	0.0118385	-0.0041984	0.00166644	0.00167685	1.21e-12	0.0123	-0.0052231	0.0024367	0.032072
rs144014029	C	T	0.0861219	-0.0802784	0.00764584	0.00770326	1.98e-29	1.98e-25	-0.018996	0.011322	0.093387
rs144032256	T	C	-0.0674722	0.0079534	0.00699844	0.00710974	5.36e-22	0.263	0.0023108	0.0096269	0.8103
rs144151632	A	G	0.0299505	-0.0854675	0.0133583	0.0135504	0.025	2.84e-10	-0.018048	0.01424	0.20499
rs144468328	A	G	0.0341058	-0.0419832	0.00707232	0.00714566	1.42e-06	4.22e-09	-0.0018387	0.011485	0.8728
rs144578061	C	A	0.0911996	-0.0801192	0.009359	0.00944961	1.95e-22	2.28e-17	-0.0013437	0.013775	0.92229
rs1445996	T	C	-0.00829716	0.0110456	0.00166889	0.00167875	6.64e-07	4.72e-11	0.0026656	0.002463	0.27915
rs144941883	G	C	0.0582453	-0.000793571	0.00933199	0.00936673	4.33e-10	0.932	0.018056	0.014786	0.22203
rs1451194	T	C	-0.00630058	0.00960032	0.00166512	0.00168011	0.000154	1.1e-08	-0.0035747	0.0024331	0.14178
rs145347194	C	T	0.0929796	0.0322585	0.00300722	0.00303332	1e-200	2.05e-26	0.013474	0.0041961	0.0013229
rs145396448	T	C	-0.0687553	-0.00115814	0.0123185	0.0122432	2.38e-08	0.925	0.018422	0.011872	0.12073
rs145521244	A	G	-0.0586468	-0.0125802	0.0049187	0.00495421	8.96e-33	0.0111	-0.0027263	0.0068773	0.6918
rs145555063	T	C	-0.0160696	0.0340332	0.00552301	0.00560777	0.00362	1.29e-09	0.0051242	0.0072146	0.47755
rs145835700	T	G	0.0155808	-0.0357341	0.00526852	0.00531604	0.0031	1.79e-11	0.0001482	0.0071643	0.9835
rs145904381	C	T	0.0502111	-0.031777	0.00749379	0.00752987	2.08e-11	2.44e-05	-0.0035564	0.010871	0.74356
rs145914258	A	G	-0.0614899	0.186071	0.00778161	0.00787891	2.75e-15	2.62e-123	0.025244	0.010458	0.01578
rs145990683	A	G	0.0630306	-0.0387742	0.00878945	0.00880681	7.44e-13	1.07e-05	-0.010707	0.013991	0.44409
rs146182298	T	C	-0.0213321	0.0240858	0.00417704	0.00420393	3.27e-07	1.01e-08	-0.00027368	0.0060646	0.96401
rs146458927	T	C	-0.0392723	-0.0204033	0.0048599	0.00488764	6.43e-16	2.99e-05	-0.011861	0.0071996	0.099475
rs1464780	G	A	0.0166873	-0.0267121	0.00353414	0.00355823	2.34e-06	6.04e-14	-0.0024871	0.0054228	0.64649
rs147056003	G	T	0.0423878	-0.0116586	0.00277785	0.00281493	1.43e-52	3.45e-05	-0.0088982	0.0039061	0.022724
rs147070419	G	T	-0.0543511	0.085747	0.0117	0.0118972	3.39e-06	5.71e-13	-0.013233	0.014099	0.34792
rs147146149	G	C	-0.0614703	-0.0185794	0.00715193	0.00720227	8.33e-18	0.00989	-0.031814	0.0104	0.0022205
rs147294109	T	C	-0.0296264	0.01166	0.00531798	0.00537326	2.53e-08	0.03	-0.0075897	0.0075297	0.31347
rs147320189	T	C	0.0221216	-0.0631848	0.00878281	0.0088299	0.0118	8.32e-13	-0.015556	0.013705	0.25635
rs147464145	T	C	0.160384	-0.0284872	0.00789051	0.00796902	7.54e-92	0.000351	-0.011224	0.010721	0.29518
rs147495290	A	G	0.0637071	-0.0601877	0.00990534	0.00993229	1.26e-10	1.36e-09	-0.028343	0.016686	0.089394
rs147525635	G	A	0.00846526	-0.0123715	0.0017393	0.00175129	1.13e-06	1.62e-12	0.0035302	0.0023767	0.13745
rs147547063	C	T	0.0200071	0.0666807	0.0101785	0.010288	0.0493	9.09e-11	0.0093266	0.015216	0.53991
rs147957878	T	C	0.0335849	-0.0608665	0.00911969	0.00920557	0.000231	3.79e-11	-0.014432	0.012208	0.23714
rs147972269	C	T	0.0904394	-0.103121	0.0114674	0.0116213	3.1e-15	7.09e-19	0.00022097	0.016825	0.98952
rs148358468	A	G	-0.0440358	0.0462895	0.00394207	0.00397903	5.67e-29	2.79e-31	-0.0065736	0.0054253	0.22565
rs1486000	G	A	0.0120998	-0.0142059	0.00221911	0.0022404	4.97e-08	2.29e-10	0.00086985	0.0031764	0.7842
rs148636348	A	G	-0.0302049	0.0323782	0.00581653	0.00586785	2.07e-07	3.43e-08	0.010811	0.008724	0.21528
rs148654654	T	C	0.183665	-0.0189482	0.0109387	0.0110488	2.87e-63	0.0864	-0.039775	0.013689	0.0036643
rs149548627	G	A	-0.0215841	0.0792997	0.0106651	0.0106306	0.043	8.68e-14	0.0077287	0.016719	0.6439
rs149893205	C	T	0.0135843	-0.0995794	0.0101346	0.0101337	0.18	8.65e-23	-0.023826	0.017742	0.1793
rs149994632	T	C	-0.0239451	0.0503755	0.0091714	0.00916306	0.00903	3.85e-08	0.0052569	0.013764	0.70252
rs150266133	T	C	-0.137358	0.0261521	0.0134023	0.0136502	1.2e-24	0.0554	0.035921	0.018954	0.058064
rs150416160	G	C	-0.0219296	0.0237954	0.00431796	0.00435986	3.8e-07	4.82e-08	-7.1345e-05	0.0060085	0.99053
rs150611042	A	C	0.0199658	-0.0243292	0.00334158	0.00338266	2.3e-09	6.37e-13	-0.011826	0.0046957	0.011789
rs150718550	G	A	0.00764895	-0.0575799	0.00880473	0.0088038	0.385	6.14e-11	-0.022024	0.013343	0.098823
rs150742285	T	C	-0.0568285	0.0149534	0.00972876	0.00978417	5.18e-09	0.126	-0.0070388	0.023695	0.76642
rs1508099	C	A	-0.00991232	0.0170642	0.00175307	0.00177461	1.57e-08	6.86e-22	0.006138	0.0026106	0.018713
rs1508103	G	A	-0.0186611	0.0470431	0.00331838	0.00335096	1.87e-08	9.04e-45	0.011187	0.0049973	0.025183
rs1509338	A	G	-0.00723191	0.00930277	0.00161173	0.001623	7.22e-06	9.93e-09	0.00045564	0.0023591	0.84685
rs151073910	T	C	0.00996811	-0.0571068	0.0101823	0.0104099	0.328	4.12e-08	-0.012183	0.01345	0.36506
rs151235402	T	C	-0.0692712	0.0424803	0.0064023	0.00644832	2.78e-27	4.46e-11	-0.0035093	0.0095684	0.7138
rs1534696	C	A	-0.0148816	0.0156414	0.00165994	0.00167029	3.1e-19	7.64e-21	-0.00012123	0.0023734	0.95926
rs1536317	T	C	-0.0224614	0.00903517	0.00406714	0.00410405	3.34e-08	0.0277	-0.0062554	0.0062752	0.31884
rs1545301	T	C	-0.00893855	0.00793766	0.00160792	0.00162224	2.71e-08	9.93e-07	-0.0012208	0.0023709	0.6066
rs1560390	C	T	-0.0466793	-0.0143451	0.00196973	0.00199709	3.75e-124	6.82e-13	-0.0073297	0.002852	0.01017
rs1571953	C	T	0.00741751	-0.0124171	0.00192102	0.00193745	0.000113	1.46e-10	-0.0030253	0.0028373	0.28631
rs1650527	T	C	-0.0207102	0.0219417	0.00190255	0.00192052	1.35e-27	3.14e-30	-0.00047674	0.0028141	0.86547
rs1672867	A	G	-0.151327	0.0210085	0.00663981	0.00667677	5.65e-115	0.00165	0.046393	0.0091494	3.9668e-07
rs16861373	A	G	0.0181629	-0.0121714	0.00241789	0.00243942	5.83e-14	6.05e-07	0.0054294	0.0035255	0.12356
rs16872619	G	A	-0.0096609	0.0128741	0.00224981	0.00226262	1.75e-05	1.27e-08	-0.00053369	0.0033226	0.87239
rs1689796	G	T	-0.0272973	0.00648741	0.0017045	0.00172017	1.01e-57	0.000162	0.011919	0.0024981	1.8325e-06
rs16958055	A	G	-0.174443	0.0301186	0.0232033	0.0234142	5.56e-14	0.198	-0.035622	0.034729	0.30502
rs16965150	T	C	0.0427229	-0.0101809	0.0051076	0.00516431	6.03e-17	0.0487	-0.0037574	0.0071482	0.59913
rs17029977	C	T	0.0151334	-0.00121783	0.00235303	0.00237513	1.26e-10	0.608	0.006327	0.0035217	0.072406
rs17052061	G	T	0.0211791	-0.0184282	0.00216084	0.00217698	1.11e-22	2.56e-17	-0.0060936	0.0030524	0.045897
rs17054104	T	C	0.00354058	0.0231427	0.00254949	0.00257759	0.165	2.75e-19	0.012894	0.0038142	0.00072389
rs17120765	A	G	-0.0190805	0.0262722	0.0027859	0.00281044	7.44e-12	8.93e-21	0.001451	0.0040105	0.7175
rs17326656	T	G	-0.0134251	0.00968379	0.00191277	0.00193256	2.24e-12	5.42e-07	0.0062844	0.0027737	0.023471
rs17369163	G	C	-0.0283126	0.00964042	0.00246957	0.00249415	1.99e-30	0.000111	0.0026875	0.0036058	0.45607
rs17432483	C	T	-0.0205957	0.0156221	0.00341378	0.00344373	1.61e-09	5.72e-06	-0.00030911	0.0049144	0.94985
rs17519079	A	G	0.00784188	-0.031922	0.00324498	0.00327785	0.0157	2.06e-22	-0.0078842	0.0047579	0.097501
rs17570439	C	T	-0.0127094	0.012116	0.00193091	0.00194807	4.64e-11	4.99e-10	-0.0053717	0.0027714	0.052586
rs17593921	T	C	0.0106265	-0.0274235	0.00496996	0.00499905	0.0325	4.12e-08	-0.0018766	0.007217	0.79485
rs17633378	T	C	0.00969077	-0.00724143	0.00163077	0.00164418	2.81e-09	1.06e-05	-0.0031355	0.0024197	0.19504
rs1767141	A	C	-0.0242982	-0.0110293	0.00277804	0.00280674	2.2e-18	8.51e-05	-0.012145	0.0040992	0.0030477
rs17821056	C	A	0.0139557	0.00747338	0.00165019	0.00166638	2.74e-17	7.3e-06	0.0046616	0.0024256	0.054624
rs17821316	A	C	0.0677136	0.0189518	0.00166645	0.00169902	1e-200	6.8e-29	0.0092035	0.0023544	9.2648e-05
rs17849502	T	G	-0.0210462	-0.00822339	0.0038171	0.00384714	3.51e-08	0.0326	0.0011701	0.0052963	0.82515
rs17875327	G	A	-0.017388	0.022776	0.00261059	0.00262627	2.73e-11	4.23e-18	0.00072821	0.0038219	0.84889
rs17876031	A	G	0.00694625	-0.0126792	0.00185426	0.00187741	0.00018	1.44e-11	-0.0035724	0.0025274	0.15753
rs1799963	A	G	0.0542357	-0.102316	0.00888888	0.00904452	1.05e-09	1.14e-29	-0.019222	0.011373	0.091002
rs180828242	G	A	-0.0653897	0.0703703	0.00954844	0.00958662	7.48e-12	2.13e-13	-0.0079258	0.016531	0.63161
rs181174790	T	C	-0.0104846	0.0748634	0.009195	0.00929385	0.254	7.94e-16	0.01683	0.01263	0.18265
rs181405169	T	C	-0.0168142	0.0472429	0.00745667	0.00752494	0.0241	3.43e-10	0.019602	0.010968	0.073908
rs181703090	T	C	-0.0506589	0.0689712	0.00851988	0.00864578	2.75e-09	1.49e-15	0.0073561	0.010618	0.48844
rs182570046	T	C	0.13287	-0.15473	0.0160667	0.0162447	1.34e-16	1.65e-21	-0.013491	0.019187	0.48196
rs183366661	G	A	0.0821725	-0.0768921	0.00993338	0.00980396	1.31e-16	4.4e-15	0.0023395	0.018514	0.89944
rs1839437	T	A	-0.0111846	0.0068998	0.00181434	0.00182553	7.07e-10	0.000157	0.00033078	0.0025848	0.89817
rs184793043	A	G	-0.105176	0.245653	0.0120041	0.0120303	1.92e-18	1.12e-92	0.060116	0.016392	0.00024505
rs1852683	A	T	0.00424815	-0.00927504	0.0016395	0.0016525	0.00957	1.99e-08	0.0032164	0.0024194	0.18371
rs185406241	C	T	-0.0584696	0.0669469	0.0108083	0.0108677	6.31e-08	7.27e-10	-0.0080081	0.018902	0.67181
rs1861649	C	T	0.00956923	-0.0139755	0.0023526	0.00237651	4.75e-05	4.09e-09	0.0021348	0.003548	0.54737
rs1866631	G	A	0.0109852	-0.00392005	0.0016314	0.00164785	1.66e-11	0.0174	2.4359e-05	0.0023842	0.99185
rs186800534	G	C	0.146566	0.0298243	0.010249	0.0103744	2.17e-46	0.00404	0.020294	0.01243	0.10254
rs186913468	A	G	-0.0147516	0.0853996	0.0110547	0.0112065	0.182	2.53e-14	0.003896	0.014272	0.78487
rs1869143	G	T	-0.0139039	-0.0025104	0.00232522	0.00235071	2.24e-09	0.286	-0.0056943	0.0033276	0.087036
rs186968338	A	G	-0.0100216	0.0536614	0.00955417	0.00956694	0.294	2.03e-08	0.018675	0.012472	0.1343
rs187007743	G	T	-0.0516674	0.0200566	0.00945972	0.00971358	4.71e-08	0.0389	0.0041511	0.010632	0.69621
rs187013686	T	C	0.153453	-0.170102	0.0099448	0.0099599	1.02e-53	2.14e-65	-0.03771	0.018469	0.04117
rs187285433	T	C	0.0371002	-0.137708	0.0101558	0.0102595	0.000259	4.46e-41	0.011155	0.011141	0.31671
rs187471874	A	C	0.0903942	-0.0181023	0.00830216	0.00839434	1.31e-27	0.031	-0.0092832	0.011426	0.41652
rs1879760	G	A	0.000136029	-0.00969856	0.0017223	0.0017386	0.937	2.43e-08	-0.0022156	0.0025712	0.38884
rs188098846	A	T	0.0933667	-0.013719	0.0132898	0.0133999	2.13e-12	0.306	0.0028978	0.020509	0.88764
rs1882752	C	G	0.0276118	0.0113364	0.0017914	0.00181427	1.33e-53	4.15e-10	-0.0038341	0.0026426	0.14681
rs1883783	T	G	0.00496001	-0.0135406	0.00163519	0.00165201	0.00242	2.48e-16	-0.0066205	0.0023775	0.0053595
rs188443653	C	A	0.161348	-0.174119	0.00967422	0.00971291	1.89e-62	7.32e-72	-0.0051853	0.013586	0.70272
rs188501176	G	A	-0.0714145	-0.00554254	0.00710606	0.00723952	9.21e-24	0.444	-0.030056	0.0096906	0.0019249
rs188521133	C	T	-0.0787393	0.23389	0.0117425	0.0118375	2.01e-11	6.79e-87	0.080947	0.017928	6.3336e-06
rs1889233	A	G	0.00343924	-0.0159831	0.00246611	0.00249366	0.163	1.46e-10	-0.0022932	0.0036068	0.52492
rs189452693	C	T	0.0811479	0.0129645	0.0109583	0.011036	1.31e-13	0.24	0.029375	0.017233	0.088277
rs189965467	C	T	-0.077117	0.0435632	0.00943148	0.00943558	2.92e-16	3.9e-06	0.011659	0.011821	0.324
rs190045610	T	A	-0.0238408	0.0292643	0.00514281	0.00519902	3.56e-06	1.81e-08	3.6586e-05	0.0071106	0.99589
rs191088797	T	C	0.104845	-0.0199206	0.00823232	0.00834274	3.74e-37	0.017	-0.0076035	0.013121	0.56225
rs1913196	A	G	-0.00933291	0.00585715	0.0016059	0.00161747	6.19e-09	0.000293	0.0012755	0.0023667	0.58995
rs191745558	G	A	-0.0355385	0.0769858	0.0123216	0.0124071	0.00392	5.47e-10	0.0029705	0.022826	0.89646
rs192185279	T	G	-0.0320248	0.0174044	0.00530645	0.00535332	1.59e-09	0.00115	-0.0070833	0.0079021	0.37005
rs192208805	A	G	-0.0832342	7.43886e-05	0.0131684	0.0133406	2.6e-10	0.996	0.0048887	0.018892	0.79581
rs192325752	A	G	-0.00564304	0.083582	0.00929959	0.00940295	0.544	6.17e-19	0.033107	0.012412	0.0076474
rs192423204	T	A	0.103334	-0.079292	0.00734977	0.007404	6.74e-45	9.2e-27	-0.016375	0.010439	0.11674
rs192491645	G	T	-0.0836875	0.0214911	0.0079624	0.00802052	7.74e-26	0.00737	0.026977	0.010477	0.010024
rs193220	T	C	0.00273088	-0.0106358	0.00173747	0.00175927	0.116	1.49e-09	-0.0027899	0.0025333	0.27077
rs1946990	G	A	-0.0104859	0.0143273	0.00168186	0.0016965	4.53e-10	3.03e-17	0.0022909	0.0024498	0.34972
rs1949102	G	A	0.0106386	-0.00533248	0.0018181	0.00183296	4.87e-09	0.00362	0.0041705	0.0026558	0.11634
rs1955512	G	A	-0.0101371	0.0067581	0.00166877	0.00168384	1.24e-09	5.98e-05	0.00035489	0.0024243	0.88361
rs1966500	C	T	0.00717568	-0.0145431	0.00165251	0.0016685	1.41e-05	2.88e-18	-0.0025949	0.0023789	0.27536
rs197230	G	A	0.00512347	-0.0099483	0.00162503	0.00163964	0.00162	1.3e-09	-0.0005734	0.0023835	0.80989
rs1988650	T	C	0.0115275	-0.0095619	0.00200365	0.00201527	8.75e-09	2.09e-06	-0.0043415	0.0029013	0.13455
rs1990622	G	A	-0.0135672	0.0100746	0.00164114	0.00164953	1.37e-16	1.01e-09	0.00015924	0.00239	0.94688
rs1994721	A	G	0.0139797	-0.00952817	0.00222627	0.00224208	3.4e-10	2.14e-05	0.0024956	0.003332	0.45388
rs2004793	G	A	-0.0204553	-0.0210009	0.00292706	0.00295238	2.78e-12	1.13e-12	-0.0082023	0.0042521	0.053732
rs2044755	A	T	-0.015324	0.0145391	0.00243719	0.00245757	3.22e-10	3.3e-09	0.00029897	0.0036016	0.93384
rs2055355	G	A	0.0130245	-0.0042149	0.00177136	0.00178714	1.94e-13	0.0184	0.006464	0.0025526	0.011333
rs2069827	T	G	-0.0155646	0.00176932	0.00265179	0.00266508	4.37e-09	0.507	-0.0033641	0.0040363	0.40458
rs2072947	C	T	-0.0104662	0.00886428	0.00160478	0.00161542	6.94e-11	4.08e-08	-0.0011036	0.0023618	0.64032
rs2074107	A	G	0.00647416	-0.01159	0.0020115	0.00203457	0.00129	1.22e-08	0.003268	0.0028979	0.25944
rs2076310	G	A	-0.00543115	0.0179373	0.00197225	0.00197577	0.00589	1.1e-19	0.0015435	0.002737	0.57281
rs208770	A	G	0.00957063	-0.0099187	0.00165398	0.00166307	7.19e-09	2.46e-09	-0.0014708	0.0024293	0.54488
rs2088348	C	T	-0.00356831	-0.0128569	0.00194787	0.00196338	0.067	5.82e-11	5.5159e-05	0.0028414	0.98451
rs2124038	C	G	-0.00715122	0.0107466	0.00189561	0.00190817	0.000162	1.78e-08	0.0024768	0.0028068	0.37754
rs2126606	C	T	-0.0105764	0.00196838	0.00170773	0.00172314	5.89e-10	0.253	-0.00088574	0.0025512	0.72845
rs2160251	A	G	0.00494954	-0.0100554	0.00162336	0.0016429	0.0023	9.33e-10	-0.0021649	0.002368	0.3606
rs2172071	C	T	-0.0117984	0.00841012	0.00172478	0.00173961	7.89e-12	1.33e-06	-0.0037842	0.0025323	0.13508
rs2185454	G	T	-0.0121639	0.00746147	0.0017195	0.00173058	1.5e-12	1.62e-05	-0.0012887	0.0025114	0.60785
rs220082	T	A	0.00215362	-0.0118033	0.00203583	0.00205911	0.29	9.91e-09	-0.0023827	0.0029036	0.41188
rs2218793	A	C	-0.0119064	0.00416528	0.00175833	0.00178031	1.28e-11	0.0193	0.0033479	0.0026123	0.19997
rs2229738	T	C	-0.0237354	0.024063	0.0028781	0.00289165	1.63e-16	8.68e-17	-0.0041102	0.0047575	0.38762
rs2230808	T	C	-0.0333132	-0.00671882	0.00187245	0.00188927	8.26e-71	0.000376	-0.0098396	0.0027763	0.00039384
rs2234962	C	T	0.0109456	-0.00413191	0.00191535	0.00193168	1.1e-08	0.0324	-0.0023581	0.0028543	0.40872
rs2245133	C	T	-0.0137084	0.00489984	0.00216979	0.00218787	2.65e-10	0.0251	-0.006221	0.0031622	0.049154
rs2254038	T	C	-0.0108456	0.00183195	0.00166104	0.00167243	6.6e-11	0.273	-6.8454e-05	0.0023937	0.97719
rs2254780	T	C	0.01651	-0.0047928	0.00228414	0.00229954	4.9e-13	0.0371	0.00974	0.0038104	0.010584
rs2276808	C	T	-0.0137271	0.0108513	0.00162629	0.0016379	3.15e-17	3.47e-11	0.0035761	0.0023745	0.13207
rs2280209	C	A	-0.0122977	0.000706016	0.00168437	0.00170105	2.85e-13	0.678	-0.0030288	0.0024694	0.22
rs2292811	G	A	-0.013446	0.0150102	0.00231531	0.00234609	6.34e-09	1.57e-10	0.0042656	0.0033494	0.20283
rs2298058	T	C	-0.00458945	0.0191	0.00172131	0.0017398	0.00767	4.86e-28	-0.0031766	0.0025602	0.2147
rs2298330	A	G	0.0137619	-0.00843297	0.00248996	0.00251529	3.26e-08	0.0008	0.0024689	0.0036975	0.50432
rs2302883	C	T	-0.0110498	0.0127586	0.00193034	0.00194506	1.04e-08	5.4e-11	-0.0015692	0.0027785	0.57224
rs231541	C	G	-0.02382	0.0297293	0.00217626	0.00220191	6.99e-28	1.53e-41	0.0033081	0.0032027	0.30164
rs2325976	T	C	0.0101183	-0.00517846	0.00165685	0.00166893	1.02e-09	0.00192	-0.0026118	0.0024518	0.28675
rs235314	C	T	0.0186682	9.29139e-05	0.00162096	0.00163246	1.09e-30	0.955	-0.0019601	0.0023627	0.40677
rs2365346	G	A	0.0121501	-0.00976705	0.00173565	0.00172005	2.55e-12	1.36e-08	-0.0028598	0.0024124	0.23583
rs2384998	T	C	-0.0130378	0.0102271	0.00197312	0.00199099	3.9e-11	2.8e-07	-0.001506	0.0029193	0.60594
rs2414598	G	A	0.0494803	0.00888496	0.00594863	0.00598637	8.95e-17	0.138	-0.0045319	0.0095604	0.63548
rs2415142	T	G	0.010498	-0.0110126	0.00163035	0.00164273	1.2e-10	2.03e-11	-0.001451	0.0023686	0.54015
rs2422493	A	G	0.020425	-0.00314971	0.00162529	0.00164201	3.21e-36	0.0551	-0.0036084	0.0023895	0.13101
rs2433204	G	A	0.0100413	-0.00295955	0.00163182	0.00165073	7.58e-10	0.073	-0.0011427	0.0024012	0.63414
rs2437818	C	G	0.0665003	0.0121435	0.0036524	0.00370377	4.52e-74	0.00104	0.03366	0.0053142	2.3939e-10
rs2457981	G	A	-0.010871	0.00581322	0.00167796	0.00169461	9.25e-11	0.000603	0.0049144	0.0024071	0.041185
rs2494747	G	T	0.0263988	-0.00484304	0.00175052	0.00174634	2.17e-51	0.00555	0.0054645	0.0024259	0.024287
rs2509967	G	C	-0.00755863	0.0103398	0.00168164	0.00170183	6.96e-06	1.23e-09	0.0027749	0.0024303	0.25353
rs2534600	A	C	-0.012689	0.00114563	0.0016711	0.00168276	3.12e-14	0.496	0.00042911	0.0024051	0.85839
rs254560	A	G	-0.0103612	0.00239412	0.00161223	0.00162781	1.3e-10	0.141	-0.0012258	0.0023919	0.6083
rs2591062	A	T	0.0118003	-0.014445	0.00189467	0.00190662	4.72e-10	3.56e-14	-0.0043691	0.0026853	0.10373
rs2593217	C	A	0.0114832	-0.0139217	0.00188759	0.0018995	1.18e-09	2.32e-13	-0.0046179	0.0026778	0.084621
rs2602844	C	T	0.0109651	-0.0103584	0.00161877	0.00162725	1.26e-11	1.95e-10	-0.0031979	0.0023874	0.18041
rs261290	T	C	0.102902	0.0287233	0.00168132	0.00170167	1e-200	6.37e-64	0.019136	0.0024762	1.0962e-14
rs2616213	T	C	-0.00813154	0.0112541	0.00162807	0.00164324	5.9e-07	7.45e-12	0.00052229	0.0023766	0.82605
rs2620818	A	G	-0.0120392	0.0117265	0.00168238	0.00169721	8.3e-13	4.87e-12	-0.0015266	0.0024194	0.52805
rs262695	G	A	-0.00856325	0.0123194	0.00182659	0.0018461	2.76e-06	2.5e-11	0.0022555	0.002564	0.37902
rs2641367	C	T	0.0109753	-0.00613412	0.00176978	0.00173969	5.59e-10	0.000422	0.0025483	0.0024079	0.28992
rs2750415	G	A	0.0170454	-0.00707794	0.00211041	0.00212999	6.65e-16	0.000891	0.0052062	0.0031632	0.099791
rs2768548	C	T	-0.0141694	0.0093242	0.00188817	0.00190668	6.18e-14	1.01e-06	0.0020718	0.0028273	0.46368
rs2777795	A	G	-0.053785	-0.025855	0.00272964	0.00276392	1.99e-86	8.4e-21	-0.023583	0.0039589	2.5737e-09
rs2792751	T	C	0.0290416	-0.0186944	0.00175008	0.00176448	7.65e-62	3.15e-26	0.019248	0.0026424	3.2439e-13
rs2806367	C	T	0.0168944	-0.0136615	0.00197703	0.00199748	1.28e-17	7.95e-12	5.2937e-05	0.0028335	0.98509
rs2821226	A	G	-0.0127849	0.0157668	0.00177325	0.00181843	5.6e-13	4.3e-18	0.001265	0.0023747	0.59424
rs282230	T	C	0.0324229	-0.00454647	0.004172	0.00421536	7.75e-15	0.281	-0.012485	0.0060155	0.037946
rs28273	A	G	-0.00957671	0.0118142	0.00167546	0.00168327	1.09e-08	2.24e-12	-0.00010252	0.0024533	0.96667
rs2835336	A	G	-0.0103283	0.00356837	0.00161138	0.00163198	1.46e-10	0.0288	-0.0016973	0.0023585	0.47174
rs28364045	A	G	0.0137721	0.0809396	0.0101287	0.0102374	0.174	2.65e-15	0.024583	0.013596	0.070583
rs285186	G	A	0.0119054	-0.0148575	0.00253814	0.00256093	2.72e-06	6.57e-09	-0.0022878	0.003641	0.52977
rs2853096	C	T	-0.0093872	0.00262645	0.00167585	0.00168783	2.13e-08	0.12	-0.00076209	0.0024464	0.75541
rs28549876	G	T	0.0117847	-0.0132265	0.00191038	0.00192615	6.88e-10	6.57e-12	0.00031426	0.0028199	0.91126
rs28553367	G	T	0.0054602	-0.0115587	0.00189145	0.00188126	0.00389	8.04e-10	-0.0041256	0.0026417	0.11835
rs28577186	G	A	-0.00713806	0.0105728	0.00176874	0.00178681	5.44e-05	3.28e-09	0.0019712	0.0025061	0.43155
rs28584179	T	C	-0.0261253	0.0497028	0.00277319	0.00276583	4.48e-21	3.33e-72	0.0045749	0.0041297	0.26794
rs28624578	C	T	-0.00863166	0.0124451	0.00220405	0.00222946	8.99e-05	2.38e-08	-0.00070232	0.0031328	0.82262
rs28696795	G	A	-0.0189295	0.0169558	0.00332117	0.00330785	1.2e-08	2.96e-07	0.00043937	0.004259	0.91783
rs28743105	G	C	0.0122588	-1.41429e-05	0.00203662	0.00202194	1.75e-09	0.994	-0.0056249	0.0025418	0.026899
rs28819812	A	C	0.0170228	-0.0155235	0.00171163	0.00172454	2.64e-23	2.23e-19	0.0016346	0.0025257	0.51751
rs28873836	C	G	-0.0228631	0.00540504	0.00181779	0.00183809	2.81e-36	0.00328	-0.0025495	0.0026687	0.33941
rs289566	A	G	-0.00813109	0.00934461	0.00163997	0.00165231	7.12e-07	1.55e-08	-0.0019063	0.002433	0.43332
rs289751	G	A	0.111107	-0.022376	0.00411579	0.00415782	1.68e-160	7.38e-08	-0.027393	0.005683	1.4353e-06
rs2899297	G	A	0.0196232	-0.0206872	0.00164188	0.00165281	6.36e-33	6.07e-36	-0.0044803	0.0024023	0.062188
rs2908298	A	G	-0.00804243	0.0296658	0.00220159	0.0022157	0.000259	7.02e-41	0.0085396	0.0032526	0.0086527
rs2911136	G	C	0.0109633	-0.00661667	0.00167095	0.00168571	5.34e-11	8.67e-05	-0.0031221	0.0024429	0.20125
rs2927475	T	C	0.0535319	-0.0630713	0.00868631	0.00883121	7.15e-10	9.21e-13	-0.016793	0.009783	0.086064
rs2939614	G	A	-0.0481496	-0.0100665	0.00828139	0.00820049	6.09e-09	0.22	0.0092541	0.0080273	0.24898
rs2958557	T	C	-0.0782148	0.0837946	0.0101122	0.0102226	1.04e-14	2.46e-16	0.012036	0.013455	0.37102
rs29999	A	G	0.0313702	-0.0368962	0.00614248	0.00619637	3.27e-07	2.61e-09	-0.006747	0.0095583	0.48027
rs3004079	A	G	0.0184144	-0.0171047	0.00323876	0.00326785	1.3e-08	1.66e-07	-0.0017571	0.0047774	0.71303
rs3110452	A	G	-0.00348795	-0.010807	0.00166912	0.00168521	0.0366	1.43e-10	0.0037024	0.0024331	0.12809
rs3112494	C	T	-0.0197597	0.00407692	0.00235369	0.00238203	4.65e-17	0.087	-0.0050114	0.0034716	0.14887
rs3200218	G	A	-0.0229753	0.0261437	0.00185364	0.00187109	2.79e-35	2.3e-44	0.0062167	0.0027591	0.024248
rs3204635	A	G	-0.0161897	0.0103394	0.00181588	0.00183275	4.85e-19	1.69e-08	0.0082066	0.0026261	0.001778
rs32074	C	T	0.00672173	-0.0279733	0.0028527	0.00288885	0.0185	3.55e-22	-0.013801	0.0040594	0.00067431
rs3217805	G	C	0.0101948	-0.00609189	0.00184528	0.00181971	3.3e-08	0.000815	0.00083771	0.0023987	0.72691
rs3289	C	T	-0.166173	0.151692	0.00513455	0.00518219	1e-200	2.37e-188	0.010219	0.0072273	0.1574
rs335519	G	A	0.00933514	-0.00720262	0.0016262	0.0016398	9.44e-09	1.12e-05	0.0015676	0.0023974	0.51319
rs33558	C	A	-0.00958189	0.00951151	0.00161231	0.00162402	2.8e-09	4.72e-09	0.0023273	0.0023561	0.32325
rs33999310	A	G	0.0292336	-0.018583	0.00260973	0.00262705	4e-29	1.51e-12	-0.010864	0.0037537	0.0038014
rs34068285	G	A	-0.00756846	0.0175282	0.00286872	0.00281055	0.00833	4.47e-10	0.00064008	0.0037498	0.86446
rs34110646	C	A	0.0270048	0.000745504	0.00440003	0.0044423	8.39e-10	0.867	0.0096607	0.005531	0.0807
rs34162548	T	C	0.0314613	-0.0252425	0.0037402	0.00375817	4.04e-17	1.86e-11	-0.0064213	0.0051403	0.21159
rs34245505	G	C	-0.00788049	0.0141129	0.00216376	0.00218217	0.00027	9.97e-11	-0.0028847	0.0029936	0.33523
rs34246353	C	T	-0.0249574	0.00742102	0.0027091	0.00273352	3.19e-20	0.00663	0.0012899	0.00408	0.7519
rs34311866	C	T	-0.01791	0.0188209	0.00206172	0.0020783	3.72e-18	1.35e-19	0.0029329	0.0031055	0.34497
rs34409228	T	C	0.0294631	-0.0025988	0.00244569	0.0024584	2.01e-33	0.29	0.0097689	0.0035563	0.0060167
rs34457392	G	A	0.00932286	-0.0166441	0.00264729	0.00266765	0.000429	4.4e-10	-0.0025324	0.0039189	0.51814
rs34459496	T	C	0.0228727	-0.0464189	0.00349825	0.0035399	6.22e-11	2.77e-39	-0.0091506	0.0046154	0.047409
rs34522020	A	T	-0.00529515	0.0157855	0.00238574	0.00240738	0.0265	5.49e-11	-0.00012402	0.0034382	0.97123
rs346756	A	G	0.00591904	-0.0194401	0.00310545	0.00312855	0.0566	5.17e-10	0.0026056	0.004346	0.54882
rs34758451	T	C	0.0104646	-0.0109168	0.00191922	0.00190597	4.97e-08	1.02e-08	-0.00131	0.0023939	0.58422
rs34881821	A	C	-0.0067491	0.0195166	0.0024963	0.00251764	0.00686	9.05e-15	0.00065844	0.0036123	0.85537
rs34931250	T	C	-0.0487449	0.0220515	0.00348299	0.00350091	1.67e-44	3e-10	0.022212	0.0049122	6.1305e-06
rs35053761	A	C	-0.0202553	0.0170022	0.00308195	0.00311113	4.96e-11	4.63e-08	0.0063612	0.0046651	0.1727
rs35083969	G	C	0.03501	0.00164574	0.00188867	0.00191241	1.04e-76	0.389	0.005053	0.0027193	0.063142
rs350859	T	C	-0.00881185	0.01214	0.00204656	0.00203653	1.66e-05	2.51e-09	0.00052751	0.0025926	0.83877
rs350885	A	C	-8.02535e-05	-0.0172516	0.00185448	0.00187275	0.965	3.2e-20	-0.0051333	0.002711	0.058295
rs35136575	G	C	0.0328166	-0.0161677	0.00228594	0.0022994	9.79e-47	2.05e-12	-0.019314	0.0030347	1.9649e-10
rs35144691	A	G	-0.00715423	0.0120537	0.00184663	0.00186246	0.000107	9.68e-11	-0.00031442	0.0026944	0.9071
rs35168378	T	C	-0.00789037	0.0339304	0.00562317	0.00568266	0.161	2.36e-09	0.011025	0.0072574	0.12873
rs35175715	T	C	-0.0128494	0.00806958	0.00159053	0.0016094	6.55e-16	5.33e-07	-0.0048494	0.0023629	0.040141
rs35246381	C	T	0.00259223	0.0342721	0.00190656	0.00192026	0.174	3.02e-71	0.018545	0.0028342	6.0231e-11
rs35351957	A	G	-0.0107589	0.00823246	0.00181984	0.00183893	3.38e-09	7.58e-06	0.0012066	0.0025233	0.63253
rs35360670	A	C	-0.0161862	0.0234715	0.0040628	0.00410129	6.78e-05	1.05e-08	0.0036532	0.0053344	0.49345
rs35374654	T	A	0.019523	0.000711049	0.00203068	0.00206184	6.98e-22	0.73	0.0010612	0.0028016	0.70484
rs35502610	A	G	0.020903	-0.00882141	0.00297241	0.00299664	2.03e-12	0.00324	-0.0089616	0.0044451	0.043793
rs35577047	C	A	-0.0637555	0.0186606	0.00781117	0.00779708	3.29e-16	0.0167	0.020156	0.012149	0.097085
rs35652202	A	G	0.0117148	-0.0148448	0.00187663	0.00189369	4.31e-10	4.54e-15	-0.0024747	0.0026789	0.35561
rs35665085	A	G	0.00760878	0.0242505	0.00355541	0.00357131	0.0324	1.12e-11	0.0082813	0.0051071	0.1049
rs35784342	C	T	-0.000946846	-0.027553	0.0016127	0.00162625	0.557	2.18e-64	-0.007951	0.0023575	0.00074453
rs36017758	A	G	0.0557401	0.0134329	0.00384284	0.00387803	1.13e-47	0.000533	0.0092988	0.0053415	0.081707
rs36082697	T	G	-0.00839922	0.0151781	0.0026898	0.00271042	0.00179	2.14e-08	0.00061133	0.0038966	0.87533
rs36184164	G	T	-0.014678	0.0175914	0.00266693	0.00265615	3.72e-08	3.52e-11	0.004155	0.0036717	0.25779
rs362270	T	G	-0.00873235	0.0138861	0.00180565	0.00182245	1.32e-06	2.55e-14	0.0066978	0.0025893	0.00969
rs3736951	T	C	-0.0106576	0.0038795	0.00173249	0.00172162	7.67e-10	0.0242	0.0028981	0.0023742	0.22222
rs3744811	T	C	0.00524196	-0.0123574	0.00197583	0.00200155	0.00798	6.66e-10	0.0021865	0.0028137	0.43712
rs3747973	A	G	-0.0150496	0.00826299	0.00164719	0.00166119	6.45e-20	6.55e-07	-0.0020307	0.002397	0.39689
rs3759023	C	T	-0.012743	0.00527185	0.00183915	0.0018644	4.25e-12	0.00469	-0.0037292	0.00268	0.16408
rs3761069	A	G	0.0152177	-0.00083748	0.00228242	0.00229415	2.6e-11	0.715	-0.0052927	0.0031587	0.093819
rs3761701	T	C	-0.00736481	0.0107724	0.00166179	0.00167549	9.34e-06	1.28e-10	0.0027363	0.0024307	0.26029
rs3784254	T	G	-0.00725064	-0.00926239	0.00159536	0.00161421	5.5e-06	9.58e-09	-0.0017606	0.0023551	0.45474
rs3785329	A	G	0.0158716	-0.00258407	0.00279506	0.00282988	1.36e-08	0.361	-0.0014419	0.0040153	0.71952
rs3803357	C	A	-0.0109415	0.0105021	0.00160599	0.0016164	9.56e-12	8.18e-11	0.0016058	0.0023586	0.49598
rs3803800	A	G	-0.0183182	0.0121368	0.00192407	0.00193924	1.72e-21	3.89e-10	0.0037571	0.0028811	0.19222
rs3806577	C	T	0.00776704	-0.00945443	0.00163306	0.00165006	1.97e-06	1.01e-08	-0.0039502	0.0023922	0.098676
rs3811476	A	G	0.0155238	-0.016856	0.00285853	0.0028876	5.61e-08	5.3e-09	0.0014708	0.0041418	0.72251
rs381681	G	A	-0.0503493	0.00466026	0.00503664	0.00506635	1.58e-23	0.358	0.006862	0.0074267	0.3555
rs38205	A	C	-0.00930188	0.0122867	0.00168304	0.00169105	3.26e-08	3.71e-13	0.00095089	0.0024474	0.69762
rs3843293	T	G	-0.00355307	0.00896008	0.00158966	0.0016029	0.0254	2.27e-08	-0.00068841	0.0023545	0.77
rs3900595	G	T	0.0217812	-0.0152431	0.00241848	0.00243312	2.13e-19	3.73e-10	-0.0069541	0.0037472	0.063481
rs3905247	T	C	-0.0326077	-0.013485	0.002115	0.00213946	1.25e-53	2.92e-10	-0.0053592	0.0030954	0.083386
rs39324	G	A	-0.013325	0.012479	0.00169483	0.00170278	3.78e-15	2.33e-13	0.004358	0.0024789	0.078744
rs3941597	A	C	-0.0122812	-0.00230655	0.00196485	0.00198796	4.09e-10	0.246	-0.0043706	0.002862	0.12673
rs3974807	T	C	-0.0030244	0.0150904	0.00215127	0.00216101	0.16	2.89e-12	-0.00015417	0.0030012	0.95903
rs4006430	C	G	-0.0107242	0.00926719	0.00193227	0.00195203	2.86e-08	2.06e-06	-0.00011072	0.0028312	0.9688
rs406329	T	C	0.00989896	-0.0101965	0.00166416	0.00167336	2.71e-09	1.11e-09	-0.0017429	0.0024305	0.47332
rs4077194	G	T	0.018807	-0.00566849	0.00160064	0.00161229	7.09e-32	0.000438	0.0048314	0.0023614	0.040753
rs412119	T	C	0.00958141	0.00370876	0.00175465	0.00172463	4.75e-08	0.0315	0.0033431	0.0024715	0.17617
rs4121823	T	A	-0.0694398	-0.00242857	0.00220172	0.00222908	1e-200	0.276	-0.011815	0.0032614	0.00029158
rs41272086	A	G	-0.0548132	0.0374821	0.00266905	0.00269551	1.01e-93	5.88e-44	-0.018408	0.0038215	1.4577e-06
rs41272114	T	C	0.0271099	-0.0215683	0.00419855	0.00422887	1.07e-10	3.39e-07	-0.011284	0.0060975	0.064221
rs41292412	T	C	-0.053992	0.0480368	0.00870254	0.00877374	5.5e-10	4.37e-08	0.016417	0.010795	0.12831
rs4129968	G	A	-0.00967367	0.00816288	0.00174189	0.00175631	2.8e-08	3.36e-06	-0.00077596	0.0024694	0.75335
rs41310053	T	C	0.0589356	-0.0302591	0.0107409	0.0107924	4.09e-08	0.00505	0.014527	0.015701	0.35484
rs4135240	C	T	0.00572647	-0.0102372	0.00168202	0.00169679	0.000663	1.61e-09	-0.0010008	0.0025242	0.69174
rs4143772	A	G	0.0128546	-0.0127523	0.00161763	0.00163247	1.92e-15	5.64e-15	0.0022055	0.0023794	0.35398
rs4149307	T	C	0.0649223	0.0077597	0.00221643	0.00223904	1.34e-188	0.000529	0.023247	0.0032689	1.1484e-12
rs419842	A	T	0.0135077	-0.0106036	0.00218274	0.00220046	6.08e-10	1.44e-06	0.0017398	0.0032403	0.59133
rs4233758	C	T	0.00465323	0.0141497	0.00223732	0.0022586	0.0375	3.73e-10	0.0041682	0.0032514	0.19985
rs4239651	T	C	-0.0243442	0.00654281	0.00201586	0.00203354	1.41e-33	0.00129	0.0038179	0.0028972	0.18757
rs4244866	G	C	0.0093722	-0.00699442	0.00166803	0.00167231	1.92e-08	2.88e-05	0.0030729	0.0024004	0.2005
rs4277989	A	G	-0.010752	0.00818861	0.00163277	0.00164916	4.54e-11	6.86e-07	0.0016396	0.0023712	0.48926
rs4311	T	C	-0.0084171	0.00995756	0.00162726	0.00164093	2.31e-07	1.29e-09	-0.0020812	0.0023698	0.37982
rs4320509	C	G	0.000158021	0.0337804	0.00249063	0.0025182	0.949	4.97e-41	-0.0013063	0.0035042	0.70931
rs4347951	C	T	0.00693667	-0.00971006	0.00175232	0.00177253	7.54e-05	4.3e-08	-0.00061922	0.0025447	0.80774
rs4365062	T	C	0.0105721	-0.0149795	0.00161584	0.00162693	6.04e-11	3.35e-20	-0.0039096	0.0023673	0.098641
rs4366770	T	C	0.00605517	-0.00990515	0.00172009	0.00173518	0.000431	1.14e-08	-0.003664	0.0025236	0.14652
rs4378243	G	T	-0.00764168	0.0130554	0.00212925	0.00214219	0.000332	1.1e-09	0.0049494	0.0031653	0.11791
rs4391043	T	A	-0.0100005	0.0116999	0.00193644	0.00195325	2.41e-07	2.1e-09	0.004035	0.002856	0.15771
rs4450871	G	A	0.0123551	-0.0149913	0.00182081	0.00186793	1.16e-11	1.01e-15	-0.0042773	0.0023686	0.070944
rs4489042	C	G	0.0101203	-0.00720076	0.00166384	0.00167706	1.18e-09	1.76e-05	0.0015433	0.0024356	0.52632
rs4516580	T	C	0.0142814	-0.00760676	0.00221051	0.00223296	1.04e-10	0.000658	-0.0048654	0.0031945	0.12775
rs4545126	A	G	-0.0218332	0.0363945	0.00204844	0.00207061	1.59e-26	3.72e-69	0.012294	0.0030453	5.4112e-05
rs45611741	T	C	-0.233132	0.385463	0.0110219	0.0111561	2.66e-99	1e-200	0.087126	0.01377	2.4973e-10
rs4572467	T	C	-0.00154351	0.0124085	0.00177288	0.00176458	0.384	2.04e-12	0.006356	0.0025123	0.011408
rs4597680	T	C	0.0122167	-0.00917299	0.00201478	0.00203142	1.33e-09	6.32e-06	-0.0029631	0.0028711	0.30205
rs4609187	A	G	0.0112782	-0.00719747	0.00183912	0.00185272	8.66e-10	0.000102	0.0013081	0.0026753	0.62487
rs4647760	A	C	-0.0342782	0.0175929	0.00540826	0.0054649	2.33e-10	0.00129	-0.0028789	0.007129	0.68633
rs465193	G	A	0.0122142	-0.00494753	0.002043	0.00206535	2.25e-09	0.0166	-0.0018927	0.0030296	0.53216
rs4660446	T	C	0.013532	-0.00518628	0.00176284	0.00175527	1.64e-14	0.00313	0.0056838	0.0024974	0.022854
rs4675812	G	A	-0.0137035	0.00781784	0.0016291	0.00164316	4.04e-17	1.96e-06	0.0058989	0.0023901	0.013584
rs4684787	T	C	-0.0104146	0.00690756	0.00183507	0.00184776	1.38e-08	0.000185	-0.0037357	0.002524	0.13886
rs4698880	A	G	0.00923434	-0.012303	0.00195216	0.00196529	2.24e-06	3.85e-10	0.0055968	0.0028539	0.049866
rs4708870	C	T	-0.0271981	0.00649577	0.00325328	0.0032785	6.26e-17	0.0476	0.011774	0.0050166	0.018925
rs4714902	C	A	0.0108951	-0.00129642	0.0017905	0.00178099	1.17e-09	0.467	-0.00030889	0.0024477	0.89958
rs4721624	G	A	-0.0193765	0.0104622	0.00318282	0.00320449	1.14e-09	0.0011	0.0018525	0.0044459	0.67691
rs4740383	A	G	-0.00923659	0.00580119	0.00163457	0.00165697	1.6e-08	0.000463	-0.0011108	0.0024068	0.64444
rs4741016	C	T	-0.0151493	0.0108751	0.00190926	0.0019291	2.11e-15	1.73e-08	-0.00019812	0.0027984	0.94356
rs4752518	T	C	-0.0133596	0.0114437	0.002044	0.00206534	6.32e-11	3.01e-08	-0.00067857	0.0029705	0.81931
rs4756026	T	C	0.013372	-0.00950889	0.00185455	0.00187627	5.58e-13	4.02e-07	0.00056327	0.0026756	0.83326
rs4765145	C	T	-0.0141396	0.00807111	0.00190604	0.00191823	1.19e-13	2.58e-05	0.0010683	0.0027414	0.69678
rs4765615	C	T	-0.0180731	0.00315635	0.00169573	0.00169233	1.6e-26	0.0622	0.0012386	0.0023834	0.60328
rs4768657	T	C	0.00277315	0.0130106	0.00160902	0.00162305	0.0848	1.09e-15	0.0029255	0.0023674	0.21655
rs4770433	G	A	0.00828105	-0.011456	0.00159374	0.00160554	2.04e-07	9.66e-13	-0.0011763	0.0023613	0.61837
rs4775425	G	A	-0.0107141	0.0097258	0.00159762	0.00161638	2e-11	1.78e-09	0.0043052	0.002378	0.07023
rs4776793	T	C	-0.00900044	0.0131237	0.00166709	0.00168089	6.71e-08	5.83e-15	-0.0017282	0.0024584	0.48207
rs4783972	C	A	0.0190722	-0.00342862	0.00165993	0.00167822	1.49e-30	0.0411	-0.00019556	0.0024688	0.93687
rs4788481	G	T	-0.0121273	0.00385968	0.00184038	0.00186646	4.41e-11	0.0386	0.0030368	0.0025819	0.23953
rs4792904	C	T	-0.0208533	0.0251176	0.00391071	0.0039428	9.69e-08	1.88e-10	-0.010562	0.0056927	0.063556
rs4800381	G	T	-0.00787794	0.0112163	0.00159425	0.00161096	7.75e-07	3.34e-12	0.0005106	0.0023661	0.82915
rs4804101	T	G	-0.0133608	0.0214602	0.00162765	0.00164308	2.24e-16	5.5e-39	-0.00089724	0.002381	0.70629
rs4804312	C	T	0.010574	-0.0110052	0.00167268	0.00169015	2.59e-10	7.45e-11	0.0011507	0.0023754	0.62808
rs4804414	T	C	-0.0131121	0.0215045	0.00160985	0.00162476	3.8e-16	5.47e-40	-0.0006772	0.0023796	0.77596
rs4804833	A	G	-0.0142756	0.0188964	0.00163848	0.00165321	2.97e-18	2.96e-30	-0.0045501	0.0024172	0.059785
rs4814593	T	A	-0.0118349	0.00682847	0.00212496	0.00214279	2.56e-08	0.00144	-0.0026057	0.0031598	0.40959
rs4820325	G	A	0.0196178	-0.0213179	0.00164219	0.00165302	6.8e-33	4.72e-38	-0.0054077	0.0023879	0.023538
rs4822458	C	T	0.00317487	0.0117979	0.00164039	0.00165263	0.0529	9.41e-13	7.5622e-05	0.0023677	0.97452
rs4838074	T	C	-0.0116386	0.0110417	0.00175381	0.00176541	3.22e-11	3.99e-10	-0.0001979	0.0026263	0.93993
rs4847406	C	T	0.0175588	-0.0102252	0.00168755	0.00170139	2.35e-25	1.86e-09	0.004294	0.0023621	0.069087
rs4855447	A	G	0.0126098	-0.00523994	0.00197081	0.00198783	1.57e-10	0.00839	0.0044281	0.0028614	0.12173
rs4876629	C	T	-0.00363092	-0.0119609	0.00167937	0.00169174	0.0306	1.55e-12	0.0012624	0.0024295	0.60333
rs4889543	C	T	-0.00922083	0.0020288	0.00159173	0.0016102	6.92e-09	0.208	7.3311e-05	0.0023614	0.97523
rs4894128	C	T	0.00647444	-0.0107787	0.00172931	0.00174406	0.000181	6.4e-10	-0.0007851	0.0025451	0.75772
rs4916493	T	A	-0.007446	0.0103724	0.00166217	0.00167506	7.48e-06	5.93e-10	-0.0027232	0.0024537	0.26707
rs4923543	A	G	0.00251083	-0.0107528	0.0017126	0.00173013	0.143	5.13e-10	-0.0032127	0.0025243	0.20311
rs4970484	A	G	0.0177203	-0.0138099	0.00269325	0.00266863	4.72e-11	2.28e-07	-0.0046066	0.0035302	0.19192
rs4976033	G	A	-0.0135149	0.0171386	0.00165791	0.00166678	3.59e-16	8.45e-25	0.0030976	0.0024336	0.20308
rs4986970	T	A	-0.0779924	-0.00347154	0.00477027	0.00481749	4.37e-60	0.471	-0.014273	0.0064277	0.026384
rs513533	G	A	-0.057508	0.124243	0.00258476	0.00260982	1.16e-109	1e-200	0.029079	0.0039144	1.0991e-13
rs546355	C	T	-0.012974	0.00105344	0.00172337	0.00173857	5.14e-14	0.545	-0.0060084	0.002551	0.018506
rs549058	T	G	0.0195867	-0.0161193	0.00240334	0.00242354	3.65e-16	2.91e-11	0.003005	0.0036194	0.40641
rs550996856	A	G	-0.0644906	0.0199369	0.0116416	0.0118521	3.03e-08	0.0925	-0.029061	0.024164	0.22912
rs555075	T	C	0.0154052	-0.0223959	0.00161519	0.0016345	1.46e-21	9.88e-43	0.00063636	0.0023689	0.78821
rs555766713	T	C	0.267978	-0.256477	0.010632	0.0105234	3.54e-140	3.38e-131	-0.01778	0.012216	0.14556
rs55712418	A	G	-0.00661806	0.0100221	0.00162917	0.00163472	4.86e-05	8.75e-10	-0.0035256	0.0023608	0.13533
rs55793253	C	T	-0.023053	0.0108783	0.00219891	0.00221627	1.03e-25	9.18e-07	-0.0072103	0.0032211	0.025191
rs55824420	C	G	-0.0810592	0.00443694	0.00934108	0.00945845	4.04e-18	0.639	-2.3138e-05	0.012878	0.99857
rs55898152	G	A	-0.0106499	0.00778773	0.00172849	0.00174256	7.21e-10	7.85e-06	-0.0020259	0.0025128	0.42011
rs559220724	C	A	-0.216206	0.356366	0.0108739	0.0110096	5.71e-88	1e-200	0.073837	0.013181	2.1245e-08
rs56106855	C	G	0.0144429	-0.00305777	0.00178688	0.00180433	6.33e-16	0.0901	-0.0072629	0.0026034	0.0052758
rs56150145	T	C	0.042317	0.0011775	0.00685625	0.00688887	6.74e-10	0.864	0.015127	0.010447	0.14765
rs56175545	C	T	-0.0131221	0.0154547	0.00201493	0.00202901	7.39e-11	2.6e-14	0.0019315	0.00304	0.52518
rs56196860	A	C	0.0331075	-0.0185122	0.00537523	0.00539498	7.31e-10	0.000601	0.0024389	0.0067466	0.71773
rs56208677	T	C	0.157523	-0.0256444	0.00322123	0.00325435	1e-200	3.27e-15	-0.026321	0.0046456	1.4637e-08
rs56213993	C	T	0.016624	-0.00257167	0.00182863	0.00183456	9.82e-20	0.161	-0.0043491	0.0025504	0.088149
rs56279768	T	C	0.0149261	-0.0196442	0.00181842	0.00183898	2.24e-16	1.23e-26	-0.0054214	0.0026369	0.039784
rs56334435	T	C	-0.0130903	0.00260681	0.00188331	0.00190017	3.64e-12	0.17	0.0034201	0.0027473	0.21317
rs56373382	A	T	-0.023085	0.0237081	0.0032693	0.00330371	1.65e-12	7.17e-13	-0.0012311	0.0047027	0.79348
rs56761357	A	C	-0.0144164	0.00621562	0.00234806	0.00236031	8.27e-10	0.00845	-0.0015086	0.0035163	0.6679
rs56925758	A	G	0.0244033	-0.013924	0.00203446	0.00205208	3.78e-33	1.16e-11	-0.0017013	0.0030331	0.57487
rs57256697	T	C	0.0289535	7.95422e-05	0.00507865	0.00509238	1.19e-08	0.988	0.010337	0.0084251	0.21985
rs57314858	T	C	-0.0053774	0.00928256	0.00164749	0.00166237	0.0011	2.35e-08	0.00039022	0.0024025	0.87097
rs573455	A	G	0.0202463	-0.0232837	0.00160887	0.00162231	2.58e-36	1.03e-46	-0.002196	0.0023598	0.35207
rs5745110	T	C	0.0153378	-0.00404779	0.00240035	0.00242347	1.66e-10	0.0949	-0.0025904	0.0034785	0.45647
rs5750627	C	T	-0.0106235	0.0165179	0.00175958	0.00176796	1.57e-09	9.37e-21	0.0013596	0.002553	0.59435
rs5752792	C	T	-0.0140162	0.0145738	0.00228611	0.00230775	8.73e-10	2.7e-10	0.0032636	0.0030958	0.29179
rs5753463	A	G	-0.0172742	0.0118301	0.00306457	0.0030982	1.73e-08	0.000134	0.0028646	0.0040576	0.4802
rs57817879	C	G	-0.0121219	0.005885	0.00210034	0.00212311	7.86e-09	0.00557	0.0005807	0.0030899	0.85093
rs58138751	T	C	0.0480823	-0.00953312	0.00354301	0.00358771	5.95e-42	0.00788	-0.011598	0.0054205	0.03238
rs58301047	C	G	0.0241584	-0.0139133	0.00203914	0.0020506	2.22e-32	1.16e-11	-0.0015421	0.0030292	0.61071
rs58440073	A	G	-0.0409937	0.0747651	0.00842141	0.00847511	1.13e-06	1.13e-18	-0.0030157	0.012109	0.80332
rs58640099	A	G	0.00714496	-0.0105621	0.00189052	0.00188155	0.000157	1.98e-08	-0.0028032	0.002376	0.23807
rs58895965	A	C	-0.00730062	0.0219671	0.00215449	0.00217722	0.000703	6.15e-24	0.012082	0.0030926	9.3578e-05
rs59685758	C	G	-0.0166941	0.0144859	0.00262955	0.00265389	2.17e-10	4.81e-08	0.0027258	0.0036808	0.45898
rs59781045	T	C	0.0831399	-0.0448651	0.00316772	0.00319835	7.95e-152	1.06e-44	-0.008413	0.0047023	0.073594
rs60011038	T	C	-0.0136184	0.0234889	0.00187185	0.00188532	3.45e-13	1.25e-35	0.0012803	0.0027335	0.63953
rs6012281	A	G	-0.0152156	0.00167828	0.0021035	0.00208996	4.71e-13	0.422	0.0055973	0.0028146	0.046743
rs6018185	T	C	0.00455927	-0.0121147	0.00164248	0.00166348	0.00551	3.27e-13	-0.0025832	0.0024131	0.28441
rs6018424	T	C	0.0134822	-0.00853798	0.00202596	0.00204201	2.84e-11	2.9e-05	0.0021204	0.0029454	0.47159
rs60374119	G	A	0.00865133	-0.0166857	0.00269176	0.00272004	0.00131	8.55e-10	-0.0066247	0.0039389	0.092593
rs6064563	C	T	-0.0102915	0.0111565	0.001611	0.00162493	1.68e-10	6.61e-12	0.0044714	0.0023559	0.057702
rs6068177	C	A	0.0101392	-0.0126095	0.00180874	0.0018182	2.07e-08	4.06e-12	-0.0012438	0.0026256	0.63571
rs60713274	A	G	-0.0096177	0.00891883	0.00161876	0.00163283	2.83e-09	4.7e-08	-0.00014396	0.0023651	0.95147
rs6078	A	G	0.0327721	0.0294985	0.00499022	0.00502293	5.12e-11	4.29e-09	0.0082759	0.0071139	0.2447
rs6088461	T	G	-0.0189473	0.0116717	0.00166932	0.00167883	7.39e-30	3.59e-12	-0.0048581	0.0023897	0.042059
rs6093428	A	G	-0.013962	0.0252253	0.00309177	0.00312676	6.31e-06	7.17e-16	0.012788	0.0044221	0.0038289
rs6096939	C	G	0.0111565	-0.0111642	0.00167409	0.00168855	2.66e-11	3.8e-11	0.0010725	0.002441	0.66039
rs6130969	T	G	-0.0720067	0.0585276	0.00830219	0.00833761	4.2e-18	2.22e-12	0.035189	0.014002	0.011968
rs61362984	G	A	0.0136865	-0.0253798	0.00168829	0.00170411	5.2e-16	3.64e-50	-0.0054745	0.0024343	0.024521
rs6139651	G	A	0.0144285	-0.0114917	0.00245929	0.00248158	4.44e-09	3.64e-06	0.00059199	0.0037919	0.87594
rs61461737	G	A	0.0167774	-0.00782592	0.0030338	0.0030618	3.2e-08	0.0106	-0.0046618	0.0046157	0.3125
rs61733623	G	A	-0.0496591	0.047223	0.00646307	0.00654507	1.55e-14	5.39e-13	-0.0042397	0.008855	0.63209
rs61900203	G	A	-0.00668255	0.014203	0.00251205	0.00249351	0.00781	1.23e-08	0.00067596	0.0032371	0.83459
rs61906076	G	C	-0.0542501	0.13262	0.00366188	0.00368695	1.18e-49	1e-200	0.028081	0.0053126	1.2529e-07
rs61907608	T	C	0.106693	-0.0717687	0.00826052	0.00830707	3.66e-38	5.65e-18	0.013978	0.015682	0.37275
rs61941677	G	C	-0.0596463	0.0128194	0.00244334	0.00246256	1.28e-131	1.93e-07	-0.0015005	0.0035896	0.67593
rs62017272	C	T	0.0027937	0.0111262	0.00201592	0.00202699	0.166	4.04e-08	0.0023983	0.0030274	0.42825
rs62035546	T	C	0.0375064	-0.00479351	0.0026471	0.00267889	1.43e-45	0.0736	-0.0051309	0.0039793	0.19726
rs62070804	T	C	-0.0397409	0.0389992	0.00646595	0.00652489	7.94e-10	2.27e-09	0.010434	0.0089159	0.2419
rs62075812	T	C	0.00304245	-0.0138318	0.00203969	0.00205941	0.136	1.86e-11	-0.0031569	0.0029608	0.28631
rs62093946	C	T	-0.066147	0.0745711	0.0127903	0.0128165	2.32e-07	5.94e-09	-0.013435	0.022028	0.54192
rs62104048	T	C	0.0137828	0.00143739	0.00222476	0.00224197	5.82e-10	0.521	-0.0054438	0.0033007	0.099092
rs62129968	A	C	-0.00138628	-0.0161559	0.00219625	0.00221579	0.528	3.07e-13	-0.0017965	0.00317	0.5709
rs62139105	G	A	-0.00429724	0.0452352	0.00469538	0.0046945	0.36	5.65e-22	0.0090606	0.0071202	0.20319
rs62189714	A	C	0.0100863	-0.00131373	0.00167643	0.00169409	1.78e-09	0.438	0.003149	0.002405	0.19042
rs62243070	A	G	-0.0104482	0.00677724	0.0017813	0.00179733	4.48e-09	0.000163	0.0034757	0.0025423	0.17157
rs62271368	A	T	-0.0178023	0.0148985	0.00279554	0.00282651	1.91e-10	1.36e-07	-0.004431	0.0040494	0.27386
rs62366190	G	C	0.00812919	-0.0100243	0.00176524	0.00177948	4.12e-06	1.77e-08	-0.00078104	0.0024898	0.75375
rs62397245	G	C	-0.0081096	0.0152605	0.00190047	0.00191696	1.98e-05	1.71e-15	0.00010437	0.0028444	0.97073
rs62483619	T	C	-0.00310664	-0.0118521	0.00194729	0.00195656	0.111	1.38e-09	0.0035156	0.0027799	0.20601
rs62523860	A	G	0.0380453	-0.0904279	0.00772732	0.00773419	8.5e-07	1.4e-31	-0.033753	0.0076853	1.1237e-05
rs62544382	G	T	-0.00980403	-0.0013666	0.00165688	0.00167314	3.28e-09	0.414	0.0007363	0.0023986	0.75886
rs62547093	G	A	0.0122545	-0.00456963	0.00217892	0.00219368	1.86e-08	0.0372	-0.00048551	0.0032859	0.88253
rs625476	C	T	-0.0103389	0.0120192	0.00171077	0.00172468	1.51e-09	3.19e-12	0.0024396	0.0024975	0.32868
rs62566526	A	G	-0.0205515	0.00794447	0.00329506	0.00333537	4.46e-10	0.0172	-0.0085557	0.0049619	0.084658
rs62568179	A	G	-0.0754624	-0.0130717	0.00243484	0.00245921	1e-200	1.06e-07	-0.027414	0.0035743	1.7273e-14
rs629819	A	G	-0.0107412	0.0112417	0.00175248	0.00176728	8.84e-10	2e-10	0.0024156	0.0024916	0.3323
rs633867	T	C	0.0029922	0.0535624	0.00528713	0.00532555	0.571	8.5e-24	0.020725	0.0097769	0.034021
rs634044	C	T	0.00763226	-0.0366686	0.00195009	0.00196739	9.09e-05	1.57e-77	-0.0071621	0.0028351	0.011532
rs634401	T	G	-0.0655172	0.0524272	0.00798281	0.00806104	2.26e-16	7.83e-11	-0.0071537	0.013044	0.5834
rs635711	T	G	0.0100309	-0.00103155	0.00181402	0.00183031	3.21e-08	0.573	0.0012867	0.0023991	0.59173
rs6448429	T	C	-0.0182855	0.0190526	0.00215898	0.00218134	2.46e-17	2.45e-18	0.008524	0.0031926	0.0075864
rs6461354	T	C	-0.0233227	0.0136597	0.0016445	0.00165139	1.18e-45	1.32e-16	-0.0043326	0.0024094	0.072141
rs647016	T	A	-0.0124979	0.0071836	0.0022617	0.00228354	3.28e-08	0.00166	0.0032463	0.0032549	0.3186
rs6486121	C	T	0.0106393	-0.0160522	0.00166407	0.00167837	1.62e-10	1.13e-21	-0.0013503	0.0024515	0.58176
rs650194	A	G	-0.0113432	0.00858776	0.00171157	0.00172255	3.42e-11	6.18e-07	-5.9781e-05	0.002495	0.98088
rs6503091	G	A	0.00938641	-0.00530622	0.00164585	0.00166541	1.18e-08	0.00144	0.0037939	0.0024188	0.11677
rs653169	A	G	0.0166452	-0.00748249	0.00171499	0.00173545	2.85e-22	1.62e-05	-0.00061221	0.0025591	0.81093
rs6542680	C	T	0.0222901	-0.0147045	0.00203903	0.00206147	8.13e-28	9.82e-13	0.015249	0.0030931	8.2245e-07
rs6585209	G	C	-0.010341	0.00329808	0.0016695	0.00168574	5.86e-10	0.0504	-0.0003012	0.002435	0.90156
rs6595187	G	A	0.0142473	-0.0186839	0.0017779	0.00179343	1.11e-15	2.05e-25	-0.001252	0.0026236	0.63321
rs664732	C	G	-0.0231437	0.0284957	0.00390566	0.00392757	3.11e-09	4.01e-13	-0.0070193	0.0059967	0.24179
rs6663556	G	C	-0.0314654	0.0063071	0.00392436	0.00396644	1.08e-15	0.112	0.016137	0.0057463	0.0049827
rs66731238	A	G	0.00373735	-0.0283477	0.00324964	0.00327564	0.25	4.97e-18	0.0021427	0.0037408	0.56678
rs6688009	T	C	-0.0142633	0.00980228	0.00219588	0.00221943	8.28e-11	1e-05	-0.0059834	0.0032092	0.062262
rs6691831	G	A	0.0108132	-0.005353	0.0019127	0.00192853	1.57e-08	0.00551	-0.0010352	0.0027292	0.70445
rs6710091	G	C	0.0163528	-0.0117336	0.00169403	0.00170891	4.76e-22	6.6e-12	0.0043663	0.0024661	0.076634
rs6715637	T	G	-0.0144024	0.0184959	0.00253739	0.0025636	1.38e-08	5.4e-13	-0.00067094	0.0037083	0.85642
rs672341	A	G	0.0136461	-0.00981229	0.0016363	0.00165074	7.45e-17	2.78e-09	0.0035343	0.0023847	0.13832
rs673375	G	C	0.0110017	-0.0122067	0.00191036	0.00193237	8.46e-09	2.67e-10	0.00093894	0.0028055	0.73787
rs6750720	G	C	0.0120371	-0.00651667	0.0016889	0.00170283	1.02e-12	0.00013	0.0032815	0.0024936	0.18818
rs67638406	A	G	0.0123187	-0.00730817	0.00170104	0.00171715	4.43e-13	2.08e-05	-0.0004838	0.0024573	0.84392
rs6772271	C	T	-0.0106579	0.00951167	0.00179402	0.00180825	2.84e-09	1.44e-07	0.0021216	0.0026166	0.41746
rs6773596	T	C	0.0126772	-0.00603474	0.00201856	0.00203738	3.38e-10	0.00306	0.0028888	0.0030634	0.34568
rs6773982	A	T	-0.00536187	0.0213021	0.00337653	0.00340436	0.112	3.92e-10	0.0027514	0.0050585	0.58651
rs6787781	C	G	-0.00678116	0.0140916	0.00183863	0.00185142	0.000226	2.71e-14	0.0012624	0.0026439	0.63304
rs67883055	A	C	0.0289829	-0.00984114	0.00413662	0.00417352	2.44e-12	0.0184	0.00061734	0.0052371	0.90616
rs6792725	A	G	0.00197993	0.0148501	0.00180242	0.00182366	0.272	3.86e-16	0.0059157	0.0026309	0.024545
rs686030	C	A	-0.0482289	-0.0156617	0.0022774	0.00230163	1.55e-99	1.01e-11	-0.0082883	0.0033824	0.014269
rs6866562	G	A	0.0114944	-0.00850252	0.00160672	0.00162136	8.43e-13	1.57e-07	-0.0011476	0.0023619	0.62706
rs6924387	G	A	-0.0122801	0.00183273	0.00166628	0.00168071	1.71e-13	0.276	-0.0014626	0.0024119	0.54424
rs6934083	T	C	-0.0109711	0.0264192	0.00431019	0.00434508	0.0109	1.2e-09	0.011803	0.0066456	0.075734
rs6944945	A	G	-0.00974775	0.00734222	0.00174329	0.00175347	2.25e-08	2.82e-05	-0.0007145	0.0025722	0.78118
rs6966722	A	G	-0.00942152	0.0184034	0.00328843	0.00331907	0.00417	2.94e-08	-0.0022939	0.0041034	0.57614
rs6972751	T	C	-0.00813619	0.010321	0.00181485	0.00182471	7.36e-06	1.55e-08	-0.0036675	0.0026171	0.16111
rs6977416	A	G	-0.0165409	0.0150955	0.00170147	0.00171113	2.44e-22	1.12e-18	0.0028364	0.0025227	0.26086
rs6988657	C	G	0.0023315	-0.0114282	0.00172271	0.00173941	0.176	5.03e-11	0.0031947	0.0024534	0.19286
rs6992709	A	G	0.0132398	-0.0117388	0.00228821	0.0023101	7.2e-09	3.74e-07	0.0028866	0.0032874	0.37991
rs7009673	T	C	-0.0200283	0.0232143	0.00178097	0.00179388	2.43e-29	2.65e-38	0.011954	0.0026121	4.7311e-06
rs7009861	G	C	-0.00911496	0.0058858	0.00165457	0.00167434	3.61e-08	0.000439	-0.0030519	0.0024212	0.2075
rs7010207	T	C	0.014357	-0.00747754	0.00183176	0.00184984	4.58e-15	5.29e-05	0.0041584	0.0026797	0.12071
rs7011442	T	C	0.0050963	-0.0123071	0.00174795	0.00177348	0.00355	3.93e-12	-0.0023836	0.0023941	0.31944
rs7012891	C	T	-0.030684	0.049569	0.00187367	0.00188702	2.82e-60	4.41e-152	0.020067	0.002781	5.3765e-13
rs7014389	A	T	-0.00178352	0.0173145	0.00235349	0.0023704	0.449	2.78e-13	-0.0016897	0.0035209	0.63129
rs7022699	G	A	0.00372925	-0.00916384	0.0016274	0.00164022	0.0219	2.31e-08	-0.0026738	0.0023694	0.25912
rs7103486	G	T	-0.0140651	0.00233549	0.00180244	0.00182142	6.03e-15	0.2	0.0071358	0.0025772	0.0056252
rs7110647	T	C	0.00884984	-0.0047158	0.00161768	0.00163326	4.48e-08	0.00388	-0.0019048	0.0023597	0.41953
rs7133543	G	A	-0.0110907	0.00824955	0.00168516	0.00169581	4.66e-11	1.15e-06	0.0053278	0.002403	0.026613
rs7134150	A	G	-0.0243663	0.0224566	0.0032741	0.00329878	9.91e-14	9.93e-12	-0.012027	0.0047117	0.010693
rs7134375	A	C	0.0183817	-0.0130016	0.00160598	0.00161601	2.47e-30	8.59e-16	-0.00021004	0.0023776	0.92961
rs71387113	T	A	-0.042675	0.00577062	0.00392114	0.00397792	1.38e-27	0.147	0.012134	0.0050751	0.01681
rs71443003	A	G	-0.00285488	-0.0431186	0.00299945	0.00303262	0.341	7.06e-46	-0.016506	0.004093	5.5164e-05
rs71511793	G	A	0.0456474	0.00236563	0.00596694	0.00602199	2.01e-14	0.694	0.009956	0.0090045	0.26887
rs71516780	T	G	0.0206391	-0.0174941	0.00351561	0.00354299	4.34e-09	7.91e-07	0.0047807	0.0045166	0.28984
rs71558326	T	G	-0.0124712	0.00889402	0.00191976	0.00194013	8.24e-11	4.56e-06	0.00021073	0.0027344	0.93857
rs7159513	A	G	-0.01148	0.0124435	0.00220028	0.00222738	1.81e-07	2.32e-08	-0.0040011	0.0032092	0.2125
rs7170463	G	A	0.0116251	-0.0115513	0.00176298	0.00178165	4.28e-11	8.96e-11	-0.0022196	0.002547	0.3835
rs7200805	T	C	-0.121368	0.0145767	0.00509981	0.00513579	3.46e-125	0.00454	0.010275	0.0070516	0.1451
rs7211132	G	T	0.00884222	-0.00715598	0.00159442	0.00160783	2.93e-08	8.56e-06	-0.00053357	0.0023667	0.82163
rs7214563	T	C	-0.0188015	0.0160981	0.00303381	0.00305787	5.74e-10	1.41e-07	0.00085785	0.0043716	0.84443
rs7233549	G	A	0.0252286	0.00299062	0.00171039	0.00172271	3.07e-49	0.0826	0.011582	0.0025244	4.4796e-06
rs7235246	G	C	-0.00492379	-0.0148222	0.0024902	0.00251116	0.048	3.58e-09	-0.00043674	0.0036762	0.90543
rs7251733	A	G	-0.00994656	0.0197748	0.00220242	0.00222639	6.3e-06	6.57e-19	0.0055536	0.0031356	0.076535
rs72647321	T	C	-0.0221478	0.047897	0.00602065	0.00606532	0.000234	2.86e-15	0.022679	0.0083757	0.0067746
rs72679249	G	A	-0.00847163	0.0129965	0.00178007	0.00179976	1.94e-06	5.15e-13	-0.0068648	0.00261	0.0085342
rs72729582	G	A	0.0199378	-0.0109739	0.00312058	0.0031533	1.67e-10	0.000501	-0.0052889	0.0046233	0.25264
rs72735627	T	C	0.0159796	-0.0213479	0.00303098	0.00306988	1.35e-07	3.55e-12	0.0030734	0.0040401	0.44681
rs72754154	A	G	0.0249855	-0.0229458	0.00362084	0.00365779	5.18e-12	3.54e-10	-0.0067335	0.0054502	0.21666
rs72758725	C	T	-0.0100524	0.00616617	0.001764	0.0017806	1.21e-08	0.000534	-0.0017295	0.0026174	0.50877
rs72766660	A	G	-0.0213728	0.0229924	0.00389682	0.0039363	4.14e-08	5.19e-09	-0.0068965	0.0055408	0.21325
rs72771232	C	T	0.0218334	-0.0150178	0.00309532	0.00313498	1.74e-12	1.66e-06	-0.0032327	0.0045123	0.47374
rs72786781	A	T	0.170665	-0.0354133	0.00530204	0.00538192	1e-200	4.7e-11	-0.010824	0.0076723	0.15832
rs72808082	T	C	0.0116319	-0.0432361	0.00582231	0.00589148	0.0457	2.16e-13	-0.0045868	0.0079183	0.56241
rs72819629	A	T	-0.0172973	0.0131848	0.00186711	0.00188147	1.97e-20	2.42e-12	-0.0067395	0.0027406	0.013929
rs72823039	A	G	0.0247181	-0.00109791	0.00430162	0.00433839	9.13e-09	0.8	-0.0066591	0.0057812	0.24938
rs72824773	A	G	-0.111207	0.0769667	0.0115544	0.011541	6.29e-22	2.58e-11	0.012955	0.018134	0.47497
rs72826982	C	T	-0.00593489	0.0208971	0.00358825	0.00362894	0.0981	8.49e-09	0.0053425	0.0046618	0.25179
rs72844048	A	G	-0.053531	0.0122992	0.00719782	0.00730226	1.03e-13	0.0921	-0.016807	0.0088217	0.056753
rs72872737	G	A	-0.0152842	0.0214678	0.00330305	0.00333159	3.7e-06	1.17e-10	0.0057191	0.0047845	0.23196
rs72911802	A	G	-0.0507492	0.0277655	0.00834642	0.00844906	1.2e-09	0.00102	-0.015386	0.0093318	0.099195
rs72934503	G	A	0.0111739	-0.00612313	0.0020249	0.00201036	3.42e-08	0.00232	0.0019756	0.0024105	0.41244
rs7298463	C	G	-0.0165726	0.0089655	0.00217434	0.00219707	2.5e-14	4.49e-05	-0.0052348	0.0031306	0.094495
rs73009178	A	C	0.0134917	-0.0309177	0.00253838	0.00259822	1.07e-07	1.19e-32	-0.013385	0.0035706	0.00017768
rs7308602	A	G	0.012355	-0.00822931	0.002091	0.00210093	3.45e-09	8.97e-05	0.0030516	0.003277	0.35175
rs7311276	G	A	0.0102216	-0.00665203	0.00163533	0.00164779	4.09e-10	5.42e-05	-0.0029125	0.0023613	0.21742
rs73119518	T	G	-0.0223403	0.0182364	0.00379248	0.00378103	3.85e-09	1.41e-06	0.0023779	0.0049107	0.62823
rs7312441	A	C	0.00670352	-0.0106782	0.00172579	0.00174277	0.000103	8.95e-10	-0.0033963	0.0024818	0.17117
rs73138819	A	G	0.0381135	-0.106666	0.0102884	0.0103883	0.000212	9.83e-25	0.0008389	0.012713	0.94739
rs73165503	C	G	-0.0276583	0.0167935	0.00267905	0.00269435	5.49e-25	4.58e-10	0.0066168	0.0042513	0.11961
rs73208821	C	G	-0.0469861	0.0469406	0.0031771	0.00320665	1.73e-49	1.6e-48	0.0029534	0.0043927	0.50137
rs73555880	A	G	0.0453161	-0.0069066	0.00709757	0.00714171	1.72e-10	0.334	0.018341	0.010668	0.085562
rs73597479	T	C	-0.00874289	-0.0245033	0.00431161	0.00434795	0.0426	1.74e-08	-0.0053656	0.0062204	0.38837
rs73667438	G	C	-0.0741101	0.0648776	0.00629066	0.00634616	4.89e-32	1.56e-24	-0.007718	0.0095729	0.42011
rs73669716	C	T	0.0418081	-0.0526333	0.00586721	0.00593364	1.04e-12	7.29e-19	0.00027049	0.0079438	0.97284
rs737337	C	T	-0.052322	0.0113238	0.0028056	0.00282877	1.28e-77	6.25e-05	-0.0080264	0.0044331	0.070213
rs737733	C	A	0.00905737	-0.00432163	0.00165976	0.00167439	4.84e-08	0.00985	-0.000987	0.0023819	0.6786
rs73909006	G	T	-0.0219408	-0.000185157	0.00390932	0.00395984	2e-08	0.963	0.0089173	0.0059124	0.1315
rs7404696	C	T	0.0158443	-0.0092478	0.00183544	0.00185419	6.01e-18	6.12e-07	-0.00022804	0.0026484	0.93138
rs742493	C	T	0.0111173	-0.0181079	0.00245778	0.00248005	6.09e-06	2.85e-13	-0.0080767	0.0037343	0.030552
rs74543117	C	T	-0.0141169	0.0108769	0.00241223	0.00243171	4.85e-09	7.72e-06	-0.002187	0.003473	0.52888
rs74563318	A	C	0.00307414	-0.0447511	0.00465034	0.00470227	0.509	1.78e-21	-0.025202	0.0064169	8.5841e-05
rs74645322	G	C	-0.0725367	0.0631904	0.00634152	0.00639871	2.69e-30	5.32e-23	-0.0066855	0.0098132	0.49569
rs74709851	G	A	-0.0389169	0.0633036	0.00636386	0.00639345	9.64e-10	4.11e-23	0.02675	0.0085159	0.001683
rs74882615	T	C	0.00403097	-0.0641144	0.0106421	0.0107783	0.705	2.71e-09	-0.0094623	0.012643	0.4542
rs7497973	G	A	-0.00945877	0.00388026	0.00162261	0.00163936	5.56e-09	0.0179	0.0034949	0.0023598	0.13859
rs750019	A	T	-0.0146693	0.000231729	0.00179317	0.00181057	2.82e-16	0.898	0.00015245	0.0026009	0.95326
rs75033371	T	A	0.00944924	-0.04339	0.00604963	0.00615544	0.118	1.8e-12	-0.00036328	0.0074135	0.96092
rs75152587	T	G	-0.0822244	0.0070457	0.00728493	0.00739483	1.52e-29	0.341	0.0066098	0.010646	0.53467
rs75160368	A	G	0.00381637	-0.0193991	0.00296578	0.0029976	0.198	9.7e-11	-0.0029475	0.0040067	0.46195
rs75246752	C	G	0.0694142	0.0311783	0.0100385	0.0102048	4.69e-12	0.00225	0.02324	0.010399	0.025428
rs75322037	G	A	0.0255748	-0.0370634	0.00563927	0.00571896	5.76e-06	9.12e-11	-0.0091133	0.0070282	0.19474
rs75346962	C	T	-0.0470478	0.00363532	0.00593044	0.0059674	2.13e-15	0.542	0.003314	0.0085651	0.69882
rs75463836	A	G	-0.0198531	0.0166504	0.00360825	0.00364329	3.75e-08	4.87e-06	5.8405e-05	0.0048795	0.99045
rs7553823	A	T	-0.0238627	0.0152998	0.00392506	0.00396356	1.21e-09	0.000113	-0.01017	0.0056127	0.069985
rs755407	T	C	-0.0108849	0.0117606	0.00180815	0.00182158	1.75e-09	1.07e-10	-0.0013592	0.0026725	0.61104
rs75571736	A	G	0.0155741	-0.0145946	0.00276449	0.0027903	1.76e-08	1.69e-07	-0.00095794	0.0039549	0.80861
rs75609851	A	G	0.16998	-0.207884	0.00851058	0.00864335	9.5e-89	8.09e-128	-0.0036671	0.011943	0.75882
rs75658883	T	C	-0.0679956	-0.00368267	0.00520058	0.00525973	4.6e-39	0.484	0.0096658	0.0070542	0.17062
rs75662196	C	G	0.0442685	-0.0586925	0.00553005	0.00559956	1.19e-15	1.05e-25	-0.0081049	0.0072613	0.26434
rs7568603	T	G	-0.0097897	0.0114256	0.00163083	0.00164539	1.94e-09	3.81e-12	0.0041975	0.0024053	0.08097
rs75706039	T	C	-0.0432218	0.00891232	0.00577426	0.00584361	7.14e-14	0.127	0.0026384	0.0079495	0.73997
rs75772194	G	A	-0.0144563	0.0153002	0.00212771	0.00215141	1.09e-11	1.15e-12	-0.0079742	0.0031698	0.011882
rs7586605	C	T	-0.0120117	0.00194883	0.00181958	0.00183566	4.07e-11	0.288	-0.00057906	0.0026381	0.82626
rs75941857	A	G	0.00531621	0.0723103	0.00889362	0.00895298	0.55	6.66e-16	0.015877	0.013155	0.22744
rs7605145	A	C	0.012315	-0.0107519	0.00197771	0.00199827	4.76e-10	7.42e-08	-0.0020237	0.0028678	0.48041
rs76086106	A	G	0.0308176	-0.00905933	0.00405247	0.00407712	2.86e-14	0.0263	0.0040389	0.0061632	0.51226
rs76144871	A	G	0.0212648	0.00106985	0.00379844	0.00383206	2.16e-08	0.78	0.0078391	0.005875	0.1821
rs7622114	C	A	-0.0139707	0.00926164	0.00162695	0.00163911	8.92e-18	1.6e-08	0.0043914	0.0023983	0.067099
rs76290759	G	A	0.272963	0.035495	0.00853816	0.00859471	1e-200	3.63e-05	0.072156	0.011904	1.3477e-09
rs76392461	A	G	-0.0870625	0.00501692	0.012269	0.0122801	1.28e-12	0.683	-0.00054985	0.018758	0.97662
rs76423146	T	C	-0.165444	0.150639	0.00515821	0.00520657	1e-200	4.66e-184	0.0092794	0.0072423	0.2001
rs76438892	G	A	-0.0786763	-0.0125918	0.0114389	0.0114984	6.07e-12	0.273	-0.021184	0.020377	0.29853
rs76516661	C	A	-0.0484951	0.00058418	0.00576792	0.00578261	4.18e-17	0.92	-0.011869	0.0078092	0.12855
rs7658703	C	T	-0.0119969	0.000918656	0.00199767	0.00201582	1.91e-09	0.649	0.00497	0.0028666	0.08296
rs76623698	C	A	0.0584059	-0.0606648	0.0106497	0.0107332	4.15e-08	1.59e-08	-0.015394	0.015321	0.31501
rs76656279	C	G	-0.0203693	0.0112992	0.00331338	0.00336051	7.87e-10	0.000773	-0.004774	0.0051319	0.35223
rs76702034	G	A	0.0201811	-0.0153405	0.00350344	0.0035206	8.39e-09	1.32e-05	-0.0006173	0.0049954	0.90165
rs76732693	A	G	0.0108416	-0.014152	0.00241909	0.00243985	7.41e-06	6.62e-09	-0.0012356	0.0034877	0.72314
rs76820699	T	C	0.0547407	-0.0928493	0.00892446	0.00904966	8.58e-10	1.07e-24	-0.041157	0.011781	0.0004767
rs76868109	C	A	-0.157454	0.130359	0.00511299	0.00514753	1e-200	1.71e-141	-0.0097279	0.006477	0.13312
rs768878	T	C	-0.00764727	0.0111048	0.0019619	0.00197654	9.7e-05	1.93e-08	-0.0022518	0.0028536	0.43005
rs7693147	C	T	0.0112885	-0.0070468	0.00200225	0.00201957	1.72e-08	0.000484	0.0043112	0.0028306	0.12775
rs76964330	G	A	0.00487808	0.0464008	0.0056241	0.00567779	0.386	3.02e-16	0.014004	0.0079356	0.077623
rs77050717	A	G	-0.206666	0.0338636	0.00654811	0.00665976	1e-200	3.68e-07	0.020822	0.0084051	0.013239
rs77125494	C	T	0.0398615	0.00297681	0.00619488	0.00626116	1.24e-10	0.634	0.01126	0.008079	0.1634
rs77213073	T	C	0.0167794	-0.045304	0.00580488	0.00585876	0.00385	1.05e-14	0.0059453	0.0078352	0.44797
rs7732198	C	T	-0.0102583	0.00916745	0.00161419	0.00162553	2.08e-10	1.7e-08	0.00074559	0.0023641	0.75247
rs77442565	C	T	0.0155619	-0.0094347	0.00226328	0.00228072	6.16e-12	3.52e-05	-0.000369	0.0034752	0.91544
rs7751478	T	C	0.00325129	-0.00924419	0.00163621	0.00165005	0.0469	2.11e-08	-0.0024625	0.0023776	0.30034
rs7753368	G	T	-0.0047798	0.0174528	0.00307119	0.00310592	0.12	1.92e-08	0.0023421	0.0046011	0.61073
rs77620153	A	G	0.00306504	-0.0211152	0.00345213	0.00348003	0.375	1.3e-09	0.003681	0.0052012	0.47911
rs7786102	G	A	-0.008559	0.0211758	0.00178588	0.00179615	1.65e-06	4.42e-32	-0.010407	0.0027099	0.00012294
rs77906287	A	G	-0.00257385	-0.0291381	0.00466706	0.00471802	0.581	6.58e-10	-0.0069928	0.0061595	0.25625
rs77916918	A	G	0.0316874	-0.0176733	0.00474072	0.00477928	2.32e-11	0.000217	-0.001718	0.0064573	0.7902
rs7807870	T	C	-0.00878588	0.0221531	0.00176071	0.00177414	6.04e-07	8.83e-36	0.0069291	0.0024824	0.0052503
rs78198921	G	C	-0.000294662	0.0393369	0.00688586	0.0069393	0.966	1.44e-08	0.00054175	0.0097299	0.9556
rs7835627	G	A	0.0241863	-0.0267668	0.00163467	0.00164969	1.56e-49	3.34e-59	-0.0054442	0.0023876	0.022593
rs78424787	A	C	0.0151453	-0.0291002	0.00429385	0.00434519	0.00042	2.13e-11	-0.013525	0.0062773	0.031193
rs78444298	A	G	0.0218508	-0.0529357	0.00657195	0.00665277	0.000885	1.76e-15	-0.01962	0.0085576	0.021869
rs7848507	G	T	0.0105324	-0.00772445	0.00169899	0.00171327	5.67e-10	6.53e-06	-0.0020342	0.0024352	0.40353
rs78517535	C	T	-0.0647869	0.0676079	0.00899268	0.00906254	5.83e-13	8.64e-14	-0.0030981	0.013177	0.81412
rs78577579	T	G	0.0208661	-0.0219932	0.00373965	0.00377731	2.41e-08	5.8e-09	-0.0065527	0.0054786	0.23167
rs7858	T	C	0.0150875	-0.0102811	0.00223214	0.00225333	1.39e-11	5.05e-06	0.0028043	0.0032714	0.39132
rs78823812	C	A	-0.0255826	0.0149583	0.00444486	0.00449638	8.64e-09	0.000879	-0.0029659	0.0060853	0.62598
rs78980904	C	T	0.0545807	-0.0633757	0.00192687	0.00194273	1.65e-176	1e-200	-0.043837	0.0028169	1.3764e-54
rs7898735	C	T	-0.00955743	0.025315	0.00289647	0.002921	0.000968	4.45e-18	-0.011681	0.0041351	0.0047304
rs78994850	C	T	0.0388993	-0.0250821	0.00455999	0.00459862	1.46e-17	4.92e-08	0.00021865	0.0062185	0.97195
rs79070935	A	C	-0.0546827	0.0400441	0.00917144	0.00925464	2.49e-09	1.51e-05	0.010326	0.0099712	0.3004
rs79112951	T	C	-0.00556284	-0.0328912	0.00437731	0.00442652	0.204	1.08e-13	-0.010937	0.0057588	0.057543
rs79144925	T	C	-0.0540812	0.0103241	0.00318952	0.00322304	1.74e-64	0.00136	0.0016559	0.0047766	0.72885
rs79161510	C	T	-0.0122552	0.0215171	0.00363819	0.00366022	0.000756	4.14e-09	0.00075015	0.0049741	0.88013
rs79202680	T	G	0.0148869	-0.150313	0.0100851	0.0101581	0.14	1.52e-49	-0.0926	0.017303	8.7131e-08
rs79224506	T	C	-0.0212128	0.0278416	0.00330827	0.00332992	1.44e-10	6.22e-17	0.0072922	0.0048982	0.13656
rs7927024	C	T	-0.00963077	-0.0490382	0.00620573	0.00629686	0.121	6.82e-15	-0.010416	0.0073963	0.15905
rs79311290	G	A	-0.0134717	0.0169608	0.00306305	0.00307111	1.09e-05	3.34e-08	-0.0046057	0.0040148	0.25131
rs79331191	A	T	-0.0689877	-0.0315522	0.0091458	0.00925092	4.59e-14	0.000648	-0.030152	0.011762	0.010361
rs7945314	C	T	-0.0321463	0.00967742	0.00504784	0.00512342	1.91e-10	0.0589	-0.0014987	0.0065704	0.81957
rs79480747	A	C	0.0955054	0.0182545	0.0122333	0.0126406	5.86e-15	0.149	-0.001492	0.013591	0.91258
rs7954144	A	G	-0.0284263	-0.00153333	0.00160813	0.00161973	6.35e-70	0.344	-0.0056339	0.002352	0.016605
rs79610135	C	T	-0.000952777	-0.0348209	0.00504381	0.00508289	0.85	7.35e-12	-0.0099053	0.0062582	0.11348
rs79634051	C	G	0.0465236	-0.0392267	0.00557894	0.00562874	7.48e-17	3.19e-12	-0.010121	0.0070526	0.15126
rs7978985	A	G	-0.026806	-0.00736371	0.00445897	0.00452021	1.84e-09	0.103	-0.008612	0.0059817	0.14995
rs79803363	A	G	-0.0313587	0.0063216	0.00383309	0.00387121	2.81e-16	0.102	0.00029373	0.005117	0.95422
rs798889	T	G	0.055758	-0.0140825	0.00195485	0.00198235	6.09e-179	1.21e-12	0.0067439	0.0028422	0.017656
rs79966097	T	C	-0.0233965	0.0414661	0.0067316	0.00679774	0.00051	1.06e-09	0.0125	0.0084987	0.14135
rs800648	T	C	-0.0100335	0.00495954	0.00166842	0.00168276	1.81e-09	0.00321	-0.0024341	0.0024474	0.31995
rs8010219	A	G	0.0110713	-0.0041769	0.00186611	0.00188661	2.98e-09	0.0268	-0.00018485	0.0027911	0.9472
rs80213066	T	C	-0.015526	0.0230457	0.00413676	0.00418208	0.000175	3.58e-08	-0.0081153	0.0057366	0.15717
rs80236739	G	A	-0.0435833	-0.00604532	0.00459002	0.00467436	2.2e-21	0.196	-0.012944	0.0053665	0.015868
rs8029570	G	T	0.00678609	0.0124013	0.00171262	0.00172834	7.42e-05	7.22e-13	-0.0063673	0.0025052	0.011033
rs80329431	T	G	-0.00500517	0.0171296	0.00242644	0.00245071	0.0391	2.76e-12	0.0053326	0.0035587	0.13401
rs8045011	C	T	0.00125745	0.0107324	0.00181914	0.00181087	0.489	3.09e-09	0.0032204	0.0023615	0.17267
rs805318	T	C	0.0114147	-0.00838313	0.00161349	0.0016229	1.5e-12	2.4e-07	0.003486	0.002381	0.14317
rs8079270	T	C	-0.0201821	0.0104134	0.00298195	0.00299455	1.3e-11	0.000506	-0.003563	0.0046774	0.44622
rs837500	C	T	-0.0253736	-0.0028258	0.00175221	0.00175661	1.6e-47	0.108	-0.0068514	0.0024646	0.0054386
rs837640	C	T	0.0128102	-0.0195145	0.00319597	0.00323453	6.12e-05	1.61e-09	-0.0060485	0.0043786	0.16716
rs840943	C	T	0.00449652	-0.0102197	0.00161479	0.0016298	0.00536	3.6e-10	-0.0042534	0.0023693	0.072626
rs851058	A	G	0.0163303	-0.0156437	0.00166324	0.00167825	9.39e-23	1.15e-20	0.0036877	0.0023939	0.12345
rs854562	T	C	-0.010592	-0.00139451	0.00173117	0.00173819	9.45e-10	0.422	-0.003036	0.0025356	0.23117
rs871845	G	A	-0.0124111	0.0065845	0.0016883	0.00170367	1.96e-13	0.000111	0.0050477	0.0024555	0.039813
rs920803	A	C	0.0101125	-0.00597514	0.00183504	0.00184646	3.57e-08	0.00121	0.00052966	0.0027891	0.84939
rs9213	A	G	0.0153919	-0.0121005	0.00168731	0.00170151	7.36e-20	1.15e-12	0.0034595	0.0024587	0.15942
rs921919	G	A	0.0399235	0.000227787	0.00175325	0.00176485	8.86e-115	0.897	0.0038724	0.0025544	0.12953
rs9242	C	T	-0.00965494	0.00366272	0.00164998	0.00166592	4.87e-09	0.0279	0.0018765	0.0023538	0.42532
rs924466	A	G	-0.020274	0.00322181	0.00194641	0.00196016	2.09e-25	0.1	0.0013548	0.0028339	0.63259
rs9287851	A	G	0.00954332	-0.0123666	0.00197665	0.00199675	1.38e-06	5.89e-10	-0.0048735	0.0028298	0.085028
rs929826	G	C	0.0111715	-0.0101123	0.00165005	0.00166567	1.28e-11	1.27e-09	0.0025602	0.0023975	0.28559
rs9311400	G	A	0.00709948	-0.011496	0.00160662	0.00162193	9.92e-06	1.36e-12	-0.0031179	0.0023593	0.18633
rs932988	T	C	-0.0102252	0.00456675	0.00162595	0.00164311	3.2e-10	0.00545	0.001655	0.0023521	0.48167
rs9447497	C	T	0.00923715	-0.000543843	0.00166153	0.00167314	2.71e-08	0.745	-0.0034309	0.0024607	0.16324
rs9462920	A	T	0.00669521	-0.0118968	0.00182316	0.00184187	0.00024	1.05e-10	-0.0019481	0.0027144	0.47295
rs9554263	G	C	-0.0117987	0.00571573	0.00189757	0.00191999	5.04e-10	0.00291	-0.0035171	0.0028551	0.218
rs960230	A	G	0.0115081	-0.0132493	0.00196965	0.00198888	5.14e-09	2.71e-11	0.00077828	0.0028632	0.78576
rs9604045	T	G	0.0152702	0.00449796	0.00221365	0.00224053	5.27e-12	0.0447	0.0026543	0.0028325	0.34871
rs9610329	T	C	-0.00985932	0.0117869	0.0016934	0.00170837	5.81e-09	5.22e-12	0.0022172	0.0024253	0.36061
rs9615937	C	G	-0.00364773	0.0248506	0.002796	0.00281156	0.192	9.68e-19	0.0058927	0.0040671	0.14737
rs9638774	T	G	-0.0100877	0.00802638	0.00183361	0.00184299	3.76e-08	1.33e-05	-0.00061088	0.0026644	0.81866
rs9648555	G	A	0.00948146	-0.00594365	0.00162552	0.0016346	5.45e-09	0.000277	0.00022957	0.002371	0.92286
rs9657371	A	C	0.00739555	-0.0102811	0.00164486	0.00165908	6.92e-06	5.76e-10	0.0026414	0.0024059	0.27226
rs966700	C	G	-0.00961895	0.0101721	0.00179967	0.00182028	9.05e-08	2.29e-08	0.00091127	0.0025945	0.72542
rs9746779	G	A	0.0125876	-0.014974	0.00165977	0.00167581	3.35e-14	4.06e-19	-0.0031294	0.0024388	0.19943
rs9787203	A	T	-0.0148634	0.00861425	0.00263932	0.00262491	1.79e-08	0.00103	-0.0016014	0.0037704	0.67103
rs9817452	T	G	0.0228512	-0.0193132	0.00166836	0.00168499	1.06e-42	2.05e-30	0.00096378	0.0024325	0.69195
rs9828193	G	A	-0.0122702	0.0152529	0.00211399	0.00213372	6.46e-09	8.77e-13	0.0035589	0.003157	0.25962
rs9896425	G	A	-0.0100687	0.00771276	0.00173257	0.00174757	6.19e-09	1.02e-05	0.0012517	0.0025328	0.62116
rs9896627	T	C	0.00601332	-0.0128131	0.00190375	0.00192215	0.00158	2.63e-11	-0.0053053	0.0026997	0.049394
rs9938413	T	C	0.0766261	-0.0152148	0.00243545	0.00246168	1e-200	6.38e-10	-0.0047205	0.0036164	0.1918
rs9955201	A	G	0.0552758	0.0086027	0.00405647	0.00407242	2.78e-42	0.0346	0.020178	0.0066558	0.0024328
rs9976784	A	G	-0.0182914	0.00712715	0.0019894	0.00200356	3.77e-20	0.000375	-0.0047041	0.0029556	0.11147
rs9980890	G	A	0.000859995	-0.0108275	0.00161351	0.00162954	0.594	3.04e-11	-0.0051034	0.0023596	0.030554
rs9990842	G	A	-0.0035515	0.0114681	0.00202048	0.00203784	0.0788	1.83e-08	0.004721	0.00294	0.10832

## Sheet: S7
Supplemental Table 7. Final IV set used in the multivariable MR analysis for HDL-C and LDL-C on TG.
SNP	EA	NEA	Beta_HDL	Beta_LDL	Se_HDL	Se_LDL	P_HDL	P_LDL	Beta_outcome	Se_outcome	P_outcome
rs1001204	G	A	-0.0119724	0.00270533	0.00201264	0.00206343	2.7e-09	0.19	-0.001469	0.0028475	0.60592
rs10028665	T	C	0.0104499	0.00133977	0.00175998	0.00180436	2.89e-09	0.458	-0.0038555	0.0025723	0.13392
rs10069335	T	A	0.00702755	0.0464214	0.00673054	0.00688091	0.296	1.52e-11	0.0052884	0.010542	0.61592
rs10079961	T	G	-0.000179945	-0.0196253	0.00279677	0.00288086	0.949	9.6e-12	-0.008006	0.0039612	0.043269
rs10122824	T	G	-0.0018122	0.0105495	0.00171805	0.00176611	0.292	2.33e-09	0.0036353	0.0024654	0.14034
rs1012306	C	T	-0.00961205	0.000816541	0.00162625	0.00167227	3.41e-09	0.625	0.0038484	0.0023411	0.10021
rs1013710	A	G	0.001163	0.0304718	0.00161113	0.00165498	0.47	1.05e-75	0.012021	0.0023281	2.4256e-07
rs10171847	G	C	0.00503634	-0.0137086	0.00165217	0.00169301	0.0023	5.62e-16	-0.0048157	0.0024093	0.045631
rs10184376	T	C	-0.00197821	-0.0271297	0.0030201	0.00310033	0.512	2.12e-18	-0.005043	0.0043776	0.24931
rs10184673	G	A	0.00522422	0.0195289	0.00164265	0.00168475	0.00147	4.55e-31	0.00232	0.0023768	0.32901
rs10186063	A	C	0.0024371	-0.0136345	0.00184888	0.00189647	0.187	6.51e-13	-0.0044539	0.0027371	0.10369
rs10250	T	G	0.0102969	-0.00286892	0.00172124	0.0017675	2.2e-09	0.105	-0.0032293	0.0023541	0.17012
rs10263252	A	G	-0.0177913	-0.0214609	0.00199298	0.00203385	4.38e-19	4.98e-26	0.0001602	0.0028327	0.9549
rs10273366	G	T	-0.0138946	0.00430258	0.00223784	0.00226938	5.33e-10	0.058	0.0054475	0.0029791	0.067462
rs10273527	T	G	0.0127482	-0.00216055	0.00190595	0.00194708	2.25e-11	0.267	-0.0048156	0.0027525	0.080201
rs10279638	A	G	-0.00158272	0.0173602	0.00291349	0.00297752	0.587	5.53e-09	0.0079339	0.0044803	0.076587
rs103294	T	C	0.0572123	-2.2874e-05	0.00195231	0.00200295	8.98e-189	0.991	-0.011971	0.0027668	1.5145e-05
rs10407439	A	G	0.0194621	-0.0654216	0.00180056	0.0018487	3.12e-27	1e-200	0.0080342	0.0025431	0.0015823
rs10409772	A	C	0.0091974	0.0167681	0.00291816	0.00298791	0.00162	2e-08	0.0070593	0.0044837	0.11539
rs10419086	G	A	0.0467323	-0.051965	0.00398237	0.00409004	8.45e-32	5.53e-37	-0.033036	0.0054892	1.763e-09
rs1042023	C	G	-0.0177438	0.132414	0.00768719	0.0078864	0.021	2.88e-63	0.014931	0.011572	0.19693
rs10423802	T	C	0.00919646	0.0133169	0.00195784	0.00201074	2.64e-06	3.52e-11	-0.00388	0.0028587	0.17469
rs1044573	G	A	-0.00109059	0.00985364	0.00164046	0.00167778	0.506	4.28e-09	0.0028521	0.0023195	0.21885
rs10463352	A	G	0.011348	0.00212355	0.00163788	0.00168035	4.25e-12	0.206	-0.0044478	0.0023705	0.060612
rs10733608	T	G	0.0105412	0.00608591	0.0016136	0.0016558	6.46e-11	0.000237	0.0015005	0.0023393	0.52124
rs10741741	T	C	0.010456	0.0020017	0.00171469	0.00176047	1.07e-09	0.256	0.0010376	0.0025275	0.68144
rs10750325	A	G	-0.0128053	0.00319489	0.00162954	0.00167347	3.9e-15	0.0562	0.0059968	0.0023762	0.011616
rs10757273	A	C	0.00178009	-0.0161003	0.00187024	0.00189748	0.341	2.16e-17	-0.0055329	0.0023696	0.019545
rs10773048	C	T	-0.0216674	0.00194116	0.00164492	0.00168435	1.27e-39	0.249	0.014398	0.0023204	5.4814e-10
rs10783589	C	T	-0.0134775	0.00210445	0.00168242	0.00172448	1.14e-15	0.222	0.0065126	0.0024387	0.0075734
rs10797566	T	G	0.0044759	0.0153235	0.00167501	0.00172046	0.00754	5.26e-19	0.0057934	0.0023637	0.014245
rs1081106	C	T	-0.0114722	0.0565516	0.00304347	0.00311725	0.000164	1.5e-73	-0.0011912	0.0044344	0.78822
rs10814052	A	C	-0.00412767	0.0121709	0.00217481	0.00223167	0.0577	4.93e-08	0.0031364	0.0030907	0.31021
rs10818580	A	G	0.00210969	0.011009	0.00183574	0.00189063	0.25	5.78e-09	-0.0047106	0.0026527	0.075769
rs10832956	T	C	-0.00260716	-0.0211529	0.00177996	0.00182597	0.143	4.94e-31	-0.0068383	0.0026533	0.0099592
rs10852553	A	G	0.0666928	-0.00989891	0.00219654	0.00226069	1e-200	1.19e-05	-0.016788	0.0031067	6.5344e-08
rs10876171	G	A	0.00621763	0.0124445	0.00171651	0.00175801	0.000292	1.45e-12	0.0046689	0.0024103	0.052733
rs10888898	A	G	0.0030415	-0.0400746	0.00175069	0.00178719	0.0823	2.34e-111	0.00053521	0.0024336	0.82593
rs10932008	G	A	-0.00567286	-0.0245058	0.00214867	0.00220784	0.00829	1.26e-28	-0.004438	0.0029696	0.13506
rs10936349	T	C	0.00396762	0.0111891	0.00175326	0.00179982	0.0236	5.07e-10	-0.0035511	0.0024326	0.14435
rs10955991	T	C	0.0195548	0.00159122	0.00171344	0.00175174	3.62e-30	0.364	0.0029929	0.0024945	0.23021
rs10987077	G	A	0.0129815	-0.000210455	0.00211772	0.00214883	8.79e-10	0.922	-0.0049692	0.0025049	0.047278
rs11031791	T	A	-0.0121623	-0.00115392	0.00163519	0.00167594	1.02e-13	0.491	0.0051373	0.0023645	0.029804
rs11052705	T	C	0.00973334	0.0045006	0.00167875	0.00171507	6.71e-09	0.00869	-0.0016105	0.002358	0.49462
rs1105654	G	A	-0.0496281	-0.010666	0.00168578	0.00173429	1.73e-190	7.75e-10	-0.00077421	0.0024576	0.75274
rs11071371	T	C	-0.0698823	-0.00544048	0.00239429	0.00246225	2.83e-187	0.0271	-0.023591	0.0034668	1.0132e-11
rs11077553	A	G	0.00544736	-0.0128614	0.00196056	0.00201384	0.00546	1.7e-10	0.0021762	0.0027752	0.43294
rs11079681	T	C	-0.00337405	0.0135153	0.00160994	0.00165364	0.0361	3.01e-16	0.0066144	0.0023218	0.0043886
rs11082315	G	A	0.0130398	-0.000520195	0.002003	0.00205462	7.51e-11	0.8	-0.0059027	0.0029095	0.042483
rs11086219	A	C	0.0148634	-0.000754905	0.00186028	0.00191626	1.35e-15	0.694	-0.0035213	0.0025831	0.17281
rs1109560	A	C	0.0464901	0.0166146	0.00276047	0.00282722	1.21e-63	4.19e-09	0.0025938	0.0040324	0.52007
rs11105294	A	G	-0.00509219	0.0123242	0.0017152	0.00175727	0.00299	2.33e-12	0.0059628	0.0024395	0.014517
rs111232683	C	G	-0.00987575	0.0140383	0.0019479	0.00199078	3.98e-07	1.77e-12	0.0001046	0.0024484	0.96592
rs111243475	T	C	0.00832022	0.0343093	0.00464423	0.00478139	0.0732	7.2e-13	0.01228	0.0067662	0.069535
rs111273322	A	G	-0.0120107	0.0203201	0.00256219	0.0026302	2.76e-06	1.11e-14	0.0072844	0.0037666	0.053123
rs11129736	G	A	0.0131245	-0.00165081	0.00222863	0.00228563	3.88e-09	0.47	-0.0025688	0.0031538	0.41535
rs111358663	A	T	0.0264525	-0.16152	0.00702498	0.00720223	0.000166	2.18e-111	0.036825	0.0095162	0.00010899
rs11159099	G	A	-0.00932195	-0.00950962	0.00162373	0.00166729	9.41e-09	1.17e-08	0.0038685	0.0023209	0.09556
rs111606268	C	T	0.0364056	0.00940653	0.00522679	0.00537053	3.28e-12	0.0799	0.011779	0.0068025	0.08335
rs11161570	T	C	0.00889026	0.00212654	0.00159311	0.00163161	2.4e-08	0.192	-0.0015328	0.0023199	0.5088
rs111656050	A	G	0.00976281	-0.0174188	0.00239978	0.00243058	4.74e-05	7.69e-13	-0.0026296	0.0030634	0.39068
rs111731678	A	T	-0.013445	3.69489e-05	0.00219713	0.00225952	9.4e-10	0.987	0.006133	0.0029699	0.038921
rs111740474	A	G	-0.0254899	0.105515	0.0089192	0.00941102	0.00426	3.57e-29	0.010136	0.010023	0.3119
rs11175540	A	T	0.00468259	0.0261065	0.00333094	0.00341478	0.16	2.09e-14	0.0033284	0.0045933	0.46868
rs111874802	C	T	-0.0314515	0.0107116	0.00543176	0.00556504	7.03e-09	0.0543	0.0077298	0.0074123	0.29703
rs11187530	C	T	0.0148762	-0.00646341	0.00272668	0.00280229	4.88e-08	0.0211	-0.0020132	0.0038744	0.60333
rs112091556	T	C	0.0285918	-0.000511066	0.00512783	0.00528457	2.46e-08	0.923	-0.0073566	0.0066472	0.26841
rs112125426	T	G	-0.00743629	0.0941675	0.00992487	0.0101896	0.454	2.43e-20	0.032384	0.011963	0.006788
rs112146339	C	T	-0.0332391	0.113377	0.00933322	0.00959359	0.000369	3.15e-32	0.023623	0.012487	0.058518
rs1121985	A	C	-0.00224511	-0.0110476	0.00168343	0.00173061	0.182	1.73e-10	-0.0051555	0.0024119	0.032554
rs11226111	C	T	-0.0140544	-0.0103043	0.00228186	0.00234679	7.31e-10	1.13e-05	0.0018124	0.0032398	0.57589
rs1123571	A	G	0.00151348	-0.0111135	0.00166139	0.00169327	0.362	5.26e-11	-0.00028784	0.0023322	0.90177
rs11242111	A	G	0.0224829	0.016389	0.00366053	0.00375859	8.15e-10	1.3e-05	-0.0058725	0.0053306	0.27062
rs11245481	A	G	-0.0116045	0.00141549	0.00182598	0.00188128	2.08e-10	0.452	0.0041209	0.0025845	0.11083
rs11249925	G	A	0.017937	0.00924074	0.00169382	0.00173742	3.33e-26	1.05e-07	0.00042711	0.0024198	0.8599
rs112575086	T	C	-0.00291848	-0.0154593	0.002443	0.00250629	0.232	6.91e-10	0.0026517	0.0036163	0.46339
rs112650492	G	C	-0.0296915	-0.000585314	0.0053168	0.00546998	2.34e-08	0.915	-0.0060745	0.007159	0.39616
rs112670287	C	A	0.017385	0.0416306	0.00684513	0.00700547	0.0111	2.81e-09	-0.0041423	0.010401	0.69044
rs112682351	C	A	0.00643035	0.0416797	0.00678116	0.00693789	0.343	1.88e-09	0.0086386	0.0095745	0.36693
rs112847776	G	C	0.00255432	0.028805	0.00291926	0.00300112	0.382	8.14e-22	-4.6505e-05	0.0040627	0.99087
rs112877683	A	G	0.174137	-0.0141944	0.00804935	0.00825454	8.66e-104	0.0855	-0.033653	0.012258	0.0060449
rs112924314	T	C	-0.0278677	-0.00679665	0.00396162	0.00409235	2e-12	0.0967	0.011374	0.005052	0.02436
rs113271699	A	C	0.0812014	-0.0187618	0.0067936	0.00696309	6.29e-33	0.00705	-0.052683	0.0096125	4.2405e-08
rs113286621	A	G	0.166657	-0.0229866	0.00827804	0.00845456	3.84e-90	0.00655	-0.024816	0.013496	0.065952
rs113298164	T	C	0.281443	-0.0166989	0.012983	0.0133979	3.32e-104	0.213	0.15011	0.026596	1.6616e-08
rs113456417	C	T	0.0330377	0.0493801	0.00835117	0.00849259	7.62e-05	6.08e-09	-0.0050276	0.013204	0.70339
rs113548930	A	T	0.0108331	0.0267463	0.00440028	0.00451139	0.0138	3.05e-09	-0.0014887	0.0058946	0.80061
rs113565903	T	C	-0.0335806	0.0388906	0.00531513	0.00545837	2.65e-10	1.04e-12	0.016066	0.0068361	0.018763
rs113647163	A	G	0.0420473	0.0135226	0.00457792	0.00467992	4.12e-20	0.00386	0.0046616	0.0065811	0.47874
rs113778500	T	C	-0.0308782	-0.00208535	0.00556969	0.00574473	2.96e-08	0.717	0.0025815	0.0073742	0.72628
rs113953439	A	G	-0.0148206	-0.00108595	0.00211825	0.00217581	2.62e-12	0.618	0.0069354	0.0030464	0.022812
rs114040256	G	A	0.0503668	-0.0708882	0.00983957	0.0101755	3.07e-07	3.25e-12	-0.022854	0.01118	0.040938
rs114872747	C	T	-0.0249455	0.0951254	0.0149802	0.0152054	0.0959	3.95e-10	0.0017186	0.021001	0.93478
rs1149709	G	A	0.00931292	-0.00177283	0.00163651	0.00168396	1.27e-08	0.292	-0.0010576	0.0023715	0.65562
rs115426759	G	A	0.0169395	-0.0852953	0.0143378	0.0148216	0.237	8.67e-09	0.0082065	0.014049	0.55914
rs11550348	A	G	-0.0238788	-0.0255246	0.00247058	0.00253383	4.24e-22	7.23e-24	0.0075152	0.0035212	0.032822
rs115590407	A	G	-0.00727467	0.0739636	0.00947173	0.00977703	0.442	3.88e-14	5.7635e-05	0.013024	0.99647
rs115692156	G	A	0.00709511	-0.0754246	0.00830544	0.0085091	0.393	7.72e-19	0.0021975	0.01317	0.86749
rs115717608	C	T	-0.0298941	0.0439742	0.00652006	0.00671509	4.54e-06	5.81e-11	-0.0063105	0.0068906	0.35977
rs11587362	T	C	0.009504	0.000142979	0.00168583	0.00173006	1.72e-08	0.934	-0.0038812	0.0024245	0.10941
rs11591026	T	G	-0.00819488	0.0279066	0.00401927	0.00412003	0.0415	1.26e-11	0.0050854	0.005708	0.37297
rs11591147	T	G	0.0350739	-0.432401	0.00634114	0.00647577	3.18e-08	1e-200	-0.0025753	0.0087877	0.76948
rs116008080	A	G	0.0386676	0.000919203	0.00528248	0.00542264	2.48e-13	0.865	-0.015873	0.0076541	0.038096
rs11605773	C	T	0.0248064	0.00905551	0.00306671	0.00315107	6.02e-16	0.00406	-0.013193	0.0044902	0.0033023
rs11605884	C	T	-0.0348585	-0.049031	0.00506526	0.00519812	5.91e-12	4.01e-21	0.03278	0.0081173	5.3864e-05
rs11620731	T	C	0.00831809	-0.0249009	0.00226531	0.00232814	0.000241	1.07e-26	0.0038855	0.0033163	0.24135
rs11621792	T	C	0.00257892	0.0207703	0.00165655	0.00168904	0.12	9.39e-35	0.0053257	0.002344	0.023085
rs11642862	T	C	-0.0170837	0.00584141	0.00262103	0.00269524	7.13e-11	0.0302	0.004176	0.0036369	0.25088
rs116513478	T	C	0.000128674	0.0981202	0.012038	0.0125142	0.991	4.48e-15	0.0062492	0.013608	0.64608
rs11655645	G	A	0.00324026	-0.0447141	0.00713266	0.00738134	0.65	1.38e-09	-0.0082912	0.0093117	0.37325
rs11656686	T	C	0.00969082	0.00662368	0.00170044	0.00174747	1.21e-08	0.00015	0.00044445	0.002338	0.84923
rs11659469	A	G	-0.0350216	-0.0141763	0.00172334	0.00177012	8.23e-92	1.16e-15	-0.0034809	0.0024703	0.15882
rs116885898	C	T	0.0909129	-0.340104	0.0126381	0.0131099	6.31e-13	2.21e-148	0.076091	0.017269	1.0527e-05
rs11694828	A	G	0.0160181	-0.000689903	0.00167474	0.00172605	1.13e-21	0.689	0.0018451	0.0024109	0.44408
rs117053202	C	G	-0.0385246	-0.00278316	0.00370205	0.00381276	2.32e-25	0.465	-0.00071642	0.0053706	0.89388
rs117077869	C	T	-0.0117647	0.0538454	0.0091025	0.0093652	0.196	8.95e-09	0.0012997	0.013873	0.92536
rs117139027	A	G	-0.00734546	-0.0654347	0.00821669	0.00836812	0.371	5.3e-15	-0.0076758	0.0089015	0.38852
rs1171600	C	A	0.00900015	0.00216374	0.00161375	0.00165964	2.44e-08	0.192	-0.00068021	0.0023442	0.77168
rs117200056	T	G	-0.0235559	-0.0175835	0.00264816	0.00273038	5.83e-19	1.2e-10	0.012227	0.0035616	0.00059668
rs117206526	C	A	-0.051508	0.000228086	0.00565121	0.00582667	7.9e-20	0.969	-0.0030411	0.0081153	0.70785
rs117323391	T	C	-0.0425472	-0.00349704	0.00521355	0.00535548	3.33e-16	0.514	-0.0039457	0.0067364	0.55806
rs117357660	T	C	0.0865346	-0.00259004	0.00918554	0.00939283	4.48e-21	0.783	-0.010822	0.012916	0.40209
rs117377791	C	T	0.00497839	0.107206	0.0149506	0.0153571	0.739	2.93e-12	-0.0043886	0.027061	0.87117
rs117388016	T	G	0.0540657	0.00543068	0.00570679	0.00582947	2.7e-21	0.352	-0.0010625	0.0090188	0.90622
rs117389878	G	C	0.052187	0.0127884	0.00591934	0.00608372	1.18e-18	0.0355	-0.0022477	0.0082161	0.78441
rs11739254	G	A	0.00681579	-0.0533998	0.00803642	0.00834854	0.396	1.59e-10	0.010992	0.007219	0.12784
rs1175048	C	T	0.0248146	0.00441526	0.00344917	0.00354764	6.28e-13	0.213	0.012095	0.0048519	0.012674
rs11751347	T	C	-0.0566146	-0.0280676	0.00273918	0.0028137	6.66e-95	1.95e-23	0.038267	0.003846	2.544e-23
rs1175293	C	T	-0.0225518	-0.00809451	0.00394517	0.00402369	1.09e-08	0.0443	-0.0026146	0.005211	0.61584
rs117626736	A	G	-0.0650001	0.00398893	0.0114299	0.0116669	1.29e-08	0.732	-0.0041701	0.014029	0.76627
rs117629249	G	A	0.00762813	-0.0325104	0.00549318	0.00564134	0.165	8.27e-09	-0.0024008	0.0077326	0.7562
rs117665650	C	G	0.0149887	-0.0021941	0.00271405	0.00278921	3.34e-08	0.431	-0.005521	0.0038174	0.1481
rs117753658	G	A	-0.0216683	-0.0571821	0.00650725	0.00668891	0.000869	1.24e-17	-0.016894	0.0086398	0.050539
rs117777720	T	C	0.00280696	-0.0138177	0.00187143	0.001915	0.134	5.37e-13	-0.0068354	0.0027257	0.012151
rs117824386	A	G	0.0493509	-0.00977189	0.00682811	0.00707345	4.92e-13	0.167	0.016706	0.009493	0.078443
rs11783088	G	A	-0.0118818	-0.00952529	0.00189248	0.00194432	3.42e-10	9.63e-07	0.0041789	0.0026776	0.1186
rs117948289	T	C	-0.0124632	-0.0472634	0.00607323	0.00624258	0.0402	3.7e-14	0.013856	0.0083507	0.097069
rs118005791	A	C	0.0524083	-0.0132659	0.00824901	0.00854477	2.11e-10	0.121	-0.0013769	0.011631	0.90576
rs118027010	T	C	0.0617756	-0.000896249	0.00720704	0.00740783	1.02e-17	0.904	0.027689	0.0092875	0.0028707
rs118039278	A	G	0.015354	0.111285	0.00330482	0.00338885	3.39e-06	1e-200	-0.043076	0.0042786	7.729e-24
rs118054030	A	C	-0.00687064	0.0326436	0.00391513	0.00402687	0.0793	5.21e-16	-0.0082034	0.0054942	0.13541
rs118078695	A	G	0.130903	0.00150688	0.00789113	0.00820729	8.42e-62	0.854	0.054213	0.010526	2.6039e-07
rs118115977	T	C	-0.00438002	0.0413618	0.00741419	0.00758338	0.555	4.92e-08	0.0028726	0.0095394	0.76332
rs118139539	G	C	0.0386904	-0.000554996	0.00500715	0.00513742	1.1e-14	0.914	0.0099923	0.0076721	0.19277
rs118163475	T	C	-0.0252563	0.0796961	0.00893426	0.00918091	0.0047	3.94e-18	0.014243	0.011325	0.20851
rs11846704	T	C	0.00231289	-0.0123206	0.00179935	0.00184495	0.199	2.42e-11	0.00085691	0.0026318	0.74473
rs11862052	T	C	-0.0785252	0.00972993	0.00231872	0.00239114	1e-200	4.72e-05	0.013435	0.0032536	3.6387e-05
rs11881756	C	T	0.0274335	-0.114274	0.00265373	0.00272362	4.76e-25	1e-200	0.012306	0.00364	0.00072331
rs11941320	C	A	-0.0117518	-0.00367297	0.00189594	0.00194351	5.7e-10	0.0588	0.00014646	0.0026689	0.95624
rs1196760	G	C	0.00243045	0.0193682	0.00286848	0.0029291	0.397	3.78e-11	0.0084538	0.0039917	0.034191
rs12034991	G	A	-0.0107111	-0.00243802	0.00171218	0.00175535	3.95e-10	0.165	0.0032988	0.0024066	0.17047
rs12054451	G	T	-0.000674536	0.0150594	0.00182023	0.00186614	0.711	7.04e-16	0.0038995	0.0026661	0.14358
rs12101186	G	A	-0.0131678	8.30558e-05	0.00210695	0.00216519	4.11e-10	0.969	0.0054545	0.0030296	0.071798
rs12136217	A	G	-0.00592659	0.0358309	0.00341945	0.0035092	0.0831	1.78e-24	-0.0040873	0.0047683	0.39134
rs12154949	A	G	-0.012907	0.000850461	0.00216437	0.00221593	2.47e-09	0.701	0.0049957	0.00303	0.099204
rs12208357	T	C	-0.0298216	0.0593462	0.00308481	0.00316784	4.15e-22	2.62e-78	0.044045	0.0045668	5.2127e-22
rs12214416	A	T	0.0109199	-0.0304855	0.00388045	0.00397649	0.00489	1.77e-14	0.013118	0.0056025	0.019211
rs12320328	G	A	-0.00476092	-0.0257293	0.00291599	0.0029879	0.103	7.23e-18	-0.012419	0.0041856	0.0030074
rs1240808	G	A	0.0112084	0.000317082	0.00167289	0.00171667	2.08e-11	0.853	-0.0052568	0.0024522	0.032059
rs12409233	C	G	0.00513662	-0.0247767	0.00283626	0.00290722	0.0701	1.56e-17	-0.00061064	0.0039966	0.87856
rs12415055	G	A	-0.0193959	-0.00739645	0.00250822	0.00257079	1.05e-14	0.00401	0.0019215	0.0036299	0.59656
rs1244099	T	G	-0.0148891	0.00199412	0.00200534	0.0020548	1.13e-13	0.332	0.0075732	0.0028343	0.0075404
rs12445804	A	G	0.00524288	0.0290581	0.00307574	0.00316767	0.0883	4.59e-20	0.014887	0.0044615	0.00084783
rs12452187	G	A	-0.00974057	0.000475486	0.00170978	0.00174953	1.22e-08	0.786	8.4465e-05	0.0024021	0.97195
rs12463234	T	C	-0.0022145	-0.0122827	0.00218384	0.00224177	0.311	4.28e-08	0.0034715	0.0031186	0.26563
rs12466769	A	G	-0.00950445	0.000632838	0.00165865	0.0016981	1e-08	0.709	0.0030703	0.002373	0.19571
rs1250530	T	C	0.0132683	-0.00416247	0.00177134	0.00182335	6.86e-14	0.0224	-0.0066321	0.0025315	0.0087976
rs12506484	T	C	-0.0173083	-0.000640527	0.00276055	0.0028281	3.61e-10	0.821	0.0034045	0.0040837	0.40447
rs12524288	A	C	0.0215436	-0.0154624	0.00310584	0.0031973	4.02e-12	1.32e-06	-0.0077562	0.0043692	0.075864
rs12533197	G	T	-0.0159914	0.00583318	0.00162617	0.00166175	8.05e-23	0.000448	0.0026258	0.0023494	0.26372
rs12533280	T	C	-0.00932026	0.015997	0.00201667	0.00206326	3.81e-06	8.96e-15	0.0079951	0.0029946	0.0075895
rs1253920	T	G	0.0103758	0.000576589	0.00163268	0.00167409	2.08e-10	0.731	0.0047577	0.0024007	0.047504
rs12551960	T	C	0.0152802	0.0333328	0.00304687	0.00314515	5.3e-07	3.04e-26	-0.001079	0.0043495	0.80408
rs12597335	A	G	0.0228125	-0.00258335	0.00160317	0.00164729	6e-46	0.117	-0.0030172	0.0023221	0.19384
rs12599192	G	A	-0.0108137	-0.0219494	0.00186832	0.00191838	7.13e-09	2.59e-30	-0.003582	0.0026358	0.17415
rs1271145	A	G	0.0326776	-0.0121652	0.00562481	0.00575775	6.26e-09	0.0346	-0.0041632	0.0076315	0.58539
rs12714264	T	A	0.00392896	-0.118136	0.0024117	0.00247104	0.103	1e-200	-0.005168	0.0034836	0.13793
rs1273581	C	G	-0.0450072	1.61646e-05	0.00332711	0.00343027	1.08e-41	0.996	0.0075273	0.0048416	0.12002
rs12736389	C	G	-0.0118179	0.0144558	0.00212324	0.00217653	2.61e-08	3.1e-11	0.0015093	0.0030465	0.62032
rs12747477	A	G	0.0234326	-0.338821	0.00891737	0.00908348	0.0086	1e-200	4.4961e-05	0.013264	0.9973
rs12750160	T	C	0.0360628	-0.322248	0.00991944	0.0102497	0.000277	1e-200	-0.0052693	0.010854	0.62734
rs12832859	T	C	0.0427355	-0.00744944	0.00237751	0.00243422	3.06e-72	0.00221	-0.0068816	0.0035401	0.051909
rs12907378	A	G	-0.0533163	-0.00682104	0.00269176	0.00277399	2.58e-87	0.0139	-0.01723	0.0038564	7.9047e-06
rs12914552	C	G	-0.0173857	-6.3232e-05	0.00229414	0.00235892	3.5e-14	0.979	-0.0020569	0.0033212	0.5357
rs12924886	T	A	-0.00407767	0.0542273	0.00201903	0.00207781	0.0434	3.81e-150	0.028799	0.0029684	2.985e-22
rs12951761	A	G	0.00478828	-0.0109186	0.00163862	0.00168077	0.00348	8.24e-11	-0.0047607	0.0023193	0.040112
rs12956499	A	G	-0.0234974	0.00854768	0.00426623	0.00438326	3.63e-08	0.0512	0.0030576	0.0059599	0.60793
rs12975319	A	G	-0.0164533	0.00293844	0.00176972	0.00181979	1.44e-20	0.106	0.0036931	0.0025424	0.14634
rs12978957	A	T	0.00904977	-0.0250796	0.00296908	0.00305307	0.0023	2.13e-16	0.0010532	0.0043407	0.80829
rs12981974	C	G	0.00226153	-0.0357716	0.00261532	0.00264786	0.387	1.37e-41	-0.01549	0.003583	1.5379e-05
rs13010956	C	T	0.00251601	-0.0109096	0.00167838	0.00170634	0.134	1.62e-10	-0.0030759	0.0023463	0.18986
rs13023530	A	G	1.98388e-05	0.0178162	0.00297495	0.00304974	0.995	5.16e-09	0.0022448	0.004252	0.59754
rs13057311	A	G	-0.00245291	-0.0121111	0.00185624	0.00190875	0.186	2.22e-10	-0.0044816	0.0026103	0.086006
rs13161656	C	T	-2.31299e-05	0.0224598	0.00258754	0.00265533	0.993	2.71e-17	-0.00042242	0.0037586	0.91052
rs13167972	G	A	0.0102822	0.00175758	0.00163362	0.00167391	3.09e-10	0.294	-0.0041135	0.0023731	0.083027
rs13189347	C	A	-0.0018408	-0.016538	0.00162141	0.00165943	0.256	2.15e-23	-0.0024545	0.0023305	0.29225
rs132631	A	C	0.00576519	0.0140234	0.00215567	0.00221252	0.00749	2.32e-10	-3.2147e-05	0.0030997	0.99173
rs13268	G	A	-4.60191e-05	-0.0312371	0.00527518	0.00540137	0.993	7.33e-09	-0.0066235	0.007348	0.36737
rs13270724	C	G	0.0101213	-0.00560728	0.0016456	0.00168652	7.72e-10	0.000885	-0.00044036	0.0023825	0.85336
rs1329126	C	A	0.00936079	0.0203479	0.00235463	0.00241853	7.02e-05	3.99e-17	0.0045711	0.0033806	0.17632
rs1330145	G	T	-0.00880568	0.00223907	0.00159938	0.00164526	3.68e-08	0.174	0.0020414	0.0023318	0.38134
rs13303368	G	C	0.0109526	0.00162424	0.00182225	0.00187281	1.85e-09	0.386	-0.00043424	0.0023721	0.85475
rs13322435	G	A	0.0228776	0.0031721	0.00168141	0.00172797	3.68e-42	0.0664	-0.014898	0.0023826	4.041e-10
rs13360862	G	A	-0.0115818	-0.00134752	0.00199744	0.00205068	6.7e-09	0.511	0.0042661	0.0028343	0.13228
rs13432533	G	A	0.00951204	0.000192178	0.00160666	0.00164514	3.21e-09	0.907	-0.002939	0.0023299	0.20716
rs13734	A	G	-0.0155864	0.00721997	0.00207132	0.00212498	5.28e-14	0.00068	0.0013037	0.0030045	0.66436
rs1375131	C	T	0.0138606	0.020758	0.00209884	0.00211485	4e-11	9.67e-23	-0.0067631	0.0026802	0.011626
rs137886411	A	G	-0.000246616	0.0566734	0.00897767	0.00927057	0.978	9.76e-10	-0.0020977	0.011113	0.85028
rs137928795	T	C	-0.0556021	0.12513	0.0158656	0.0164524	0.000457	2.84e-14	-0.0032523	0.017682	0.85406
rs138122475	A	G	-0.0432179	0.000429779	0.00773932	0.00794644	2.35e-08	0.957	0.012591	0.0094958	0.18485
rs138170286	A	G	-0.0286067	-0.00344271	0.0052437	0.00530008	4.89e-08	0.516	0.0067201	0.0048243	0.16363
rs138204164	G	C	-0.00225618	-0.0137907	0.00236291	0.0024196	0.34	1.2e-08	-0.00060602	0.0035013	0.86259
rs138283783	C	T	0.0802083	0.0102721	0.0076614	0.00781978	1.2e-25	0.189	0.025527	0.01172	0.029396
rs138335	C	G	0.00183358	0.0127459	0.00174241	0.00178452	0.293	9.17e-13	0.0011333	0.0024529	0.64406
rs138361368	A	C	0.0274652	-0.1032	0.00608461	0.00626462	6.37e-06	5.69e-61	-0.014434	0.0081725	0.077363
rs138468797	T	C	0.0578098	0.019985	0.00930202	0.00959634	5.14e-10	0.0373	0.0065953	0.013386	0.62222
rs138483078	A	G	-0.00215197	0.0329718	0.00229408	0.00235618	0.348	1.7e-44	-0.0036084	0.0032742	0.27043
rs138569349	A	G	0.0416795	0.0181507	0.00647588	0.00658522	1.23e-10	0.00585	-0.013974	0.0094939	0.14104
rs138692142	T	C	-0.0738522	-0.0102732	0.00978125	0.0100964	4.34e-14	0.309	0.0057114	0.011517	0.61995
rs138762595	A	G	-0.0236507	-0.0400103	0.00693503	0.00709549	0.000649	1.71e-08	0.0011978	0.0092823	0.89733
rs139144103	G	A	-0.0349401	0.0682796	0.00923763	0.00951057	0.000155	7e-13	0.029249	0.013122	0.025808
rs139211342	A	G	0.107506	0.001891	0.0105326	0.0108134	1.85e-24	0.861	0.027673	0.012674	0.028997
rs139232176	A	G	0.00480861	-0.219609	0.013645	0.0140116	0.725	2.3e-55	-0.019095	0.021334	0.37075
rs139397352	G	A	-0.00680171	0.070541	0.00991155	0.0103053	0.493	7.64e-12	0.023189	0.011169	0.037874
rs139692954	T	A	0.062805	0.00444001	0.010709	0.0111309	4.5e-09	0.69	-0.012909	0.016261	0.4273
rs139752533	T	C	0.0614168	0.0252299	0.0107599	0.0110394	1.14e-08	0.0223	-0.017853	0.015848	0.25993
rs139828053	C	T	-0.0279735	-0.0129083	0.00506361	0.00521475	3.31e-08	0.0133	-0.003291	0.0067494	0.62584
rs139907312	A	G	0.0110239	0.0596074	0.00951473	0.00984232	0.247	1.39e-09	0.005308	0.011248	0.63699
rs139937507	T	C	0.0444538	0.00358397	0.00465881	0.00480567	1.4e-21	0.456	-0.0016637	0.0057159	0.771
rs140049599	C	G	-0.0102935	-0.121563	0.0139924	0.0144551	0.462	4.11e-17	0.042708	0.020679	0.0389
rs140133389	C	G	-0.0856399	0.0119617	0.00415545	0.00427658	2.28e-94	0.00516	0.006882	0.0059524	0.24761
rs140234541	C	T	-0.0733239	-0.0161415	0.0120122	0.0124339	1.03e-09	0.194	0.002191	0.018024	0.90325
rs140390701	T	C	0.0859064	0.0108502	0.0114198	0.0117044	5.37e-14	0.354	-0.035801	0.015833	0.023746
rs140488605	T	C	0.00362342	0.0745369	0.00431762	0.00444486	0.401	4.1e-63	0.0056209	0.0056847	0.32278
rs140570886	C	T	0.000841498	0.205935	0.00716244	0.00734504	0.906	5.71e-173	-0.11677	0.0095035	1.082e-34
rs141142609	G	T	-0.000981164	0.0414289	0.0072682	0.00754558	0.893	4.01e-08	0.0031215	0.0084046	0.71034
rs141148474	C	A	0.0145846	0.00392994	0.00264268	0.00271311	3.41e-08	0.147	-0.0046932	0.0039795	0.23826
rs141201631	C	T	-0.0528183	-0.0156301	0.00849927	0.00872371	5.15e-10	0.0732	0.00439	0.01296	0.7348
rs141234987	G	A	0.00996697	-0.028679	0.00505754	0.00520328	0.0488	3.55e-08	-0.0097854	0.0065909	0.13763
rs141361464	G	C	0.0268472	8.38897e-05	0.00447021	0.00464359	1.9e-09	0.986	-0.0075971	0.0054692	0.16481
rs141607720	T	C	0.0483651	0.0104312	0.00806087	0.00829394	1.97e-09	0.209	0.0081849	0.011695	0.484
rs141705406	T	C	0.0309905	-0.00131522	0.00430747	0.00443233	6.26e-13	0.767	-0.0050561	0.0061027	0.40738
rs141778417	T	C	-0.01961	0.0589911	0.00852929	0.00879967	0.0215	2.03e-11	-0.012314	0.011093	0.26696
rs141964576	G	C	-0.00663645	0.0691336	0.0106621	0.0109706	0.534	2.94e-10	-0.0047486	0.014736	0.74727
rs142694060	G	C	-0.105449	0.0198164	0.00834776	0.00865404	1.41e-36	0.022	0.023238	0.010886	0.032789
rs142799836	A	G	0.0465297	0.00424304	0.00780573	0.00804412	2.51e-09	0.598	-0.014679	0.0097801	0.13339
rs143373095	G	A	0.0289114	-0.0559075	0.00838145	0.00857128	0.000562	6.91e-11	-0.0063317	0.011327	0.57615
rs143646411	C	T	-0.000646361	0.0574573	0.00682306	0.00700879	0.925	2.45e-16	-0.00095696	0.0091778	0.91696
rs143834286	C	T	-0.0339038	0.00662778	0.00598767	0.00614668	1.49e-08	0.281	0.0099462	0.0077459	0.19912
rs1438588	A	G	0.0118385	-0.00517851	0.00166644	0.00170422	1.21e-12	0.00238	-0.0028516	0.0024009	0.23494
rs143968008	A	G	0.0236442	0.0641964	0.00957041	0.00988141	0.0135	8.21e-11	0.011642	0.012616	0.35612
rs144032256	T	C	-0.0674722	0.0235484	0.00699844	0.00724383	5.36e-22	0.00115	0.0092207	0.0094823	0.33085
[truncated: 568 more rows]

## Sheet: S8
Supplemental Table 8. Final IV set used in the multivariable MR analysis for lipids on FI.
[truncated: 661 more rows]

[truncated: 19 more sheets: S9, S10, S11, S12, S13, S14, S15, S16, S17, S18, S19, S20, S21, S22, S23, S24, S25, S26, S27]
